# Supplementary material
Source: PubMed Central journal article supplement (PMC3128916)
Supplement: emm-43-374-s001.pdf [file emm-43-374-s001.pdf]

Supplementary Table 1. Studies genes and SNPs.

| Gene region         | Gene       | SNP500 alias  | dbSNP ID   | Genomic systematic |              |
|---------------------|------------|---------------|------------|--------------------|--------------|
| ACAD11              | ACAD11     | ACAD11-01     | rs11927882 | IVS13-7789C>T      |              |
|                     |            | ACAD11-02     | rs2305623  | IVS12-91A>C        |              |
| ADAM19              | ADAM19     | ADAM19-02     | rs10067096 | Ex19-23T>G         |              |
|                     |            | ADAM19-23     | rs4704871  | IVS16+175G>A       |              |
|                     |            | ADAM19-19     | rs1990950  | IVS15-571C>A       |              |
|                     |            | ADAM19-05     | rs11466782 | IVS14-152T>C       |              |
|                     |            | ADAM19-13     | rs17054657 | IVS12-1205G>A      |              |
|                     |            | ADAM19-21     | rs2863747  | IVS11-796G>C       |              |
|                     |            | ADAM19-12     | rs1422795  | Ex9-56A>G          |              |
|                     |            | ADAM19-11     | rs1422794  | IVS8-74C>A         |              |
|                     |            | ADAM19-26     | rs6860540  | IVS8-1852C>T       |              |
|                     |            | ADAM19-22     | rs4368711  | IVS7+1160G>A       |              |
|                     |            | ADAM19-20     | rs2042247  | IVS6-153T>C        |              |
|                     |            | ADAM19-03     | rs10454970 | IVS5+4868C>T       |              |
|                     |            | ADAM19-06     | rs11742401 | IVS5+4475G>A       |              |
|                     |            | ADAM19-14     | rs17054692 | IVS4+2520T>C       |              |
|                     |            | ADAM19-29     | rs9313634  | IVS4+327G>A        |              |
|                     |            | ADAM19-27     | rs6895161  | IVS3-1565G>A       |              |
|                     |            | ADAM19-10     | rs1363618  | IVS3-5352T>G       |              |
|                     |            | ADAM19-01     | rs10060687 | IVS3-5797C>T       |              |
|                     |            | ADAM19-15     | rs17054709 | IVS3-8289G>A       |              |
|                     |            | ADAM19-28     | rs6896064  | IVS3-10017A>C      |              |
| ADAM19-07           | rs12187501 | IVS3-12799G>A |            |                    |              |
| ADAM19-24           | rs4704883  | IVS3+2794C>A  |            |                    |              |
| ADAM19-16           | rs17054724 | IVS3+2261G>A  |            |                    |              |
| ADAM19-31           | rs11465254 | IVS2-2580G>A  |            |                    |              |
| ADAM19-25           | rs6556091  | IVS1+1282T>A  |            |                    |              |
| ALOX12              | ICHTHYIN   | ICHTHYIN-02   | rs3734029  | Ex6-977T>C         |              |
|                     | ALOX12     | ALOX12-09     | rs2292350  | IVS2-156G>A        |              |
|                     |            | ALOX12-07     | rs434473   | Ex8+14A>G          |              |
|                     |            | ALOX12-06     | rs312462   | Ex14+90G>A         |              |
| ALOX12B/<br>ALOX15B | ALOX12B    | ALOX12B-16    | rs9911644  | *4387T>C           |              |
|                     |            | ALOX12B-11    | rs3935951  | *1672A>G           |              |
|                     |            | ALOX12B-17    | rs12943817 | *1254G>A           |              |
|                     |            | ALOX12B-01    | rs12937410 | IVS12-30T>C        |              |
|                     |            | ALOX12B-07    | rs6503075  | IVS12+162C>T       |              |
|                     |            | ALOX12B-08    | rs6503076  | IVS8-391G>A        |              |
|                     |            | ALOX12B-03    | rs2304908  | IVS5+7C>G          |              |
|                     |            | ALOX12B-15    | rs7219450  | IVS2-1173T>A       |              |
|                     |            | ALOX12B-14    | rs4360988  | IVS2-1304C>A       |              |
|                     |            | ALOX12B-02    | rs2278635  | Ex1+107T>C         |              |
|                     |            | ALOX12B-12    | rs4792199  | -1357G>A           |              |
|                     |            | ALOX12B-13    | rs4792203  | -2434G>A           |              |
|                     |            | ALOX12B-10    | rs16957160 | -3664T>C           |              |
|                     |            | ALOX15B       | ALOX15B-07 | rs4383207          | -6191A>G     |
|                     |            |               | ALOX15B-04 | rs4468690          | -1719C>T     |
|                     |            |               | ALOX15B-01 | rs4247362          | IVS3-1145T>C |

|         |         |            |            |               |
|---------|---------|------------|------------|---------------|
|         |         | ALOX15B-05 | rs8078865  | *3430C>T      |
|         |         | ALOX15B-06 | rs9916382  | *3844C>T      |
| ALOX15  | ALOX15  | ALOX15-19  | rs916055   | Ex14+241T>C   |
|         |         | ALOX15-17  | rs7217186  | IVS7-129G>A   |
|         |         | ALOX15-02  | rs2664593  | -185C>G       |
| ALOX5   | ALOX5   | ALOX15-18  | rs748694   | -5242A>G      |
|         |         | ALOX5-45   | rs1864414  | IVS1+684T>G   |
|         |         | ALOX5-51   | rs4948671  | IVS2+1927C>T  |
|         |         | ALOX5-53   | rs7918542  | IVS3+4867A>G  |
|         |         | ALOX5-52   | rs7099684  | IVS3+5771A>T  |
|         |         | ALOX5-46   | rs2115819  | IVS3-6550A>G  |
|         |         | ALOX5-41   | rs10900213 | IVS3-2925G>T  |
|         |         | ALOX5-43   | rs12264801 | IVS4-4745G>A  |
|         |         | ALOX5-48   | rs3780901  | IVS4-2113C>T  |
|         |         | ALOX5-49   | rs3780906  | IVS6+1402A>G  |
|         |         | ALOX5-44   | rs1487562  | IVS7+4610C>T  |
|         |         | ALOX5-54   | rs901681   | IVS7-1349T>G  |
|         |         | ALOX5-47   | rs2291427  | IVS8+143A>G   |
|         |         | ALOX5-55   | rs4948674  | *4554A>C      |
| ALOX5AP | ALOX5AP | ALOX5AP-13 | rs4076128  | -4599A>G      |
|         |         | ALOX5AP-11 | rs4073260  | -3293A>G      |
|         |         | ALOX5AP-17 | rs4769055  | IVS1+18C>A    |
|         |         | ALOX5AP-12 | rs4075131  | IVS1+1107A>G  |
|         |         | ALOX5AP-20 | rs9578196  | IVS1+1745C>T  |
|         |         | ALOX5AP-02 | rs10507391 | IVS1+2284A>T  |
|         |         | ALOX5AP-18 | rs4769871  | IVS1+2696C>T  |
|         |         | ALOX5AP-16 | rs4503649  | IVS1-4023G>A  |
|         |         | ALOX5AP-08 | rs3885907  | IVS1-3742C>A  |
|         |         | ALOX5AP-01 | rs10162089 | IVS1-1459G>A  |
|         |         | ALOX5AP-05 | rs12431114 | IVS1-745A>G   |
|         |         | ALOX5AP-14 | rs4254165  | IVS1-319A>G   |
|         |         | ALOX5AP-22 | rs4147063  | IVS2+1658T>C  |
|         |         | ALOX5AP-07 | rs17245204 | IVS2-2201C>T  |
|         |         | ALOX5AP-21 | rs9579648  | IVS3+773G>C   |
|         |         | ALOX5AP-03 | rs10507393 | IVS3+1262T>C  |
|         |         | ALOX5AP-19 | rs9315051  | IVS4-1904A>G  |
|         |         | ALOX5AP-10 | rs3935645  | IVS4-523T>C   |
|         |         | ALOX5AP-09 | rs3935644  | IVS4-441G>A   |
|         |         | ALOX5AP-15 | rs4445746  | *3191A>G      |
| ALOXE3  | ALOXE3  | ALOXE3-12  | rs6503078  | *3304C>A      |
|         |         | ALOXE3-04  | rs3809882  | Ex15-372A>C   |
|         |         | ALOXE3-06  | rs6503080  | IVS14+3129G>A |
|         |         | ALOXE3-10  | rs9894356  | IVS14+329C>A  |
|         |         | ALOXE3-01  | rs2289588  | IVS12-150G>A  |
|         |         | ALOXE3-11  | rs9912048  | IVS12-1002G>A |
|         |         | ALOXE3-07  | rs7215288  | IVS12+1882G>A |
|         |         | ALOXE3-08  | rs7215658  | IVS12+1622G>T |
|         |         | ALOXE3-09  | rs9892383  | IVS12+1558A>G |
|         |         | ALOXE3-02  | rs3027208  | IVS7+369G>A   |
|         |         | ALOXE3-03  | rs3027215  | IVS3-131G>A   |

|         |            |                    |            |               |            |             |
|---------|------------|--------------------|------------|---------------|------------|-------------|
| BPI/LBP | BPI        | BPI-19             | rs7274607  | -9060C>T      |            |             |
|         |            | BPI-18             | rs4811656  | -5369C>G      |            |             |
|         |            | BPI-16             | rs1341022  | -62C>G        |            |             |
|         |            | BPI-04             | rs5741798  | IVS1+43C>G    |            |             |
|         |            | BPI-10             | rs6024718  | IVS1+298A>G   |            |             |
|         |            | BPI-12             | rs6069668  | IVS1+875C>G   |            |             |
|         |            | BPI-13             | rs6069672  | IVS1+1567T>C  |            |             |
|         |            | BPI-05             | rs5741800  | IVS2+197G>A   |            |             |
|         |            | BPI-14             | rs6127742  | IVS7-1722G>A  |            |             |
|         |            | BPI-06             | rs5741806  | IVS8-79C>T    |            |             |
|         |            | BPI-11             | rs6024876  | IVS9+475A>G   |            |             |
|         |            | BPI-08             | rs5743533  | IVS11-132G>A  |            |             |
|         |            | BPI-15             | rs6127776  | IVS12+1108T>C |            |             |
|         |            | BPI-02             | rs2275954  | IVS12-165A>G  |            |             |
|         |            | BPI-17             | rs2425362  | *3530A>C      |            |             |
|         |            | LBP                | LBP        | LBP-13        | rs7273717  | -3210C>T    |
|         |            |                    |            | LBP-12        | rs5741812  | -920A>T     |
| LBP-09  | rs1780617  |                    |            | -762G>A       |            |             |
| LBP-11  | rs2232578  |                    |            | -204A>G       |            |             |
| LBP-04  | rs1609800  |                    |            | IVS2+445T>A   |            |             |
| LBP-08  | rs6014804  |                    |            | IVS3-1246G>C  |            |             |
| LBP-01  | rs11086565 |                    |            | IVS5-1428A>G  |            |             |
| LBP-03  | rs12624843 |                    |            | IVS5-262G>A   |            |             |
| LBP-05  | rs1780624  |                    |            | IVS5-56C>G    |            |             |
| LBP-06  | rs1780627  |                    |            | IVS9-7T>C     |            |             |
| LBP-10  | rs1780629  |                    |            | *4154C>T      |            |             |
| LBP-14  | rs737091   |                    |            | *4611C>T      |            |             |
| C1D     | C1D        |                    |            | C1D-04        | rs7582426  | *2829T>C    |
|         |            |                    |            | C1D-02        | rs10496160 | IVS2-309C>G |
|         |            | C1D-01             | rs10203061 | IVS1-7308T>C  |            |             |
|         |            | C1D-03             | rs4671871  | IVS1+4436C>T  |            |             |
|         |            | C1QA/C1QG<br>/C1QB | C1QA       | C1QA-03       | -3755G>C   |             |
| C1QA-02 | -638A>G    |                    |            |               |            |             |
| C1QB    | C1QB       | C1QB-02            | rs631090   | IVS1+267T>C   |            |             |
|         |            | C1QB-01            | rs629409   | IVS1-567C>T   |            |             |
|         |            | C1QB-03            | rs12088436 | *3964A>C      |            |             |
|         | C1QG       | C1QG-03            | rs12404537 | -1148C>T      |            |             |
|         |            | C1QG-02            | rs672693   | IVS2+749G>A   |            |             |
|         |            | C1QG-05            | rs17433222 | *4369A>G      |            |             |
|         |            | C1QG-06            | rs291989   | *5622T>C      |            |             |
|         |            | C1QG-04            | rs12756603 | *7599A>G      |            |             |
|         |            | C1QBP              | C1QBP      | C1QBP-01      | rs2285747  | IVS3-50C>G  |
|         |            |                    |            | C1QBP-02      | rs2472614  | IVS2+393C>G |
| DHX33   | DHX33-03   |                    | rs3744711  | Ex12-1025T>C  |            |             |
| C1QR1   | C1QR1      | DHX33-02           | rs2074437  | Ex12+750A>G   |            |             |
|         |            | C1QR1-09           | rs17682491 | *6719G>A      |            |             |
|         |            | C1QR1-06           | rs2749817  | *5331G>A      |            |             |
|         |            | C1QR1-03           | rs7492     | Ex2-263T>C    |            |             |
|         |            | C1QR1-05           | rs2749812  | Ex2+1685T>C   |            |             |

|             |       |           |            |               |
|-------------|-------|-----------|------------|---------------|
|             |       | C1QR1-02  | rs3746732  | Ex1-447T>C    |
|             |       | C1QR1-07  | rs6048546  | -7371T>C      |
|             |       | C1QR1-04  | rs1884655  | -7545T>C      |
| C1RL        | C1RL  | C1RL-10   | rs3813729  | *6783G>A      |
|             |       | C1RL-11   | rs1801046  | *6688C>T      |
|             |       | C1RL-09   | rs7135975  | *5419T>C      |
|             |       | C1RL-05   | rs3782928  | Ex6+1085A>G   |
|             |       | C1RL-04   | rs3742089  | Ex6+162A>G    |
|             |       | C1RL-02   | rs11613834 | IVS5-104T>C   |
|             |       | C1RL-03   | rs17198395 | IVS5-788G>A   |
|             |       | C1RL-01   | rs11043785 | IVS5+197G>A   |
|             |       | C1RL-06   | rs744141   | IVS2-487C>G   |
|             |       | C1RL-08   | rs3782924  | -377G>A       |
|             |       | C1RL-07   | rs10845008 | -7912G>A      |
| C1S         | C1S   | C1S-06    | rs3919533  | -6415C>T      |
|             |       | C1S-01    | rs11064497 | IVS2-118C>T   |
|             |       | C1S-04    | rs7968584  | IVS5-163C>T   |
|             |       | C1S-02    | rs7183     | Ex12-318G>T   |
| C2          | BF    | BF-01     | rs1048709  | Ex3-35A>G     |
|             |       | BF-03     | rs537160   | IVS7+111A>G   |
|             |       | BF-02     | rs4151657  | IVS10+206T>C  |
|             | C2    | C2-04     | rs3130683  | -7162T>C      |
|             |       | C2-07     | rs9267677  | -2888T>C      |
|             |       | C2-03     | rs2734335  | -1585G>A      |
|             |       | C2-01     | rs7746553  | IVS2+32C>G    |
|             |       | C2-02     | rs9332739  | Ex7-35G>C     |
|             |       | C2-06     | rs609061   | IVS9-574G>A   |
|             | STK19 | STK19-02  | rs389883   | IVS5+130G>T   |
|             |       | STK19-01  | rs389512   | IVS5+264G>C   |
| C3          | C3    | C3-18     | rs379527   | *1450G>T      |
|             |       | C3-08     | rs2277984  | IVS36-4G>A    |
|             |       | C3-17     | rs344550   | IVS33-713G>C  |
|             |       | C3-04     | rs1389623  | IVS33+202C>T  |
|             |       | C3-06     | rs2241393  | IVS29-147C>G  |
|             |       | C3-11     | rs344548   | IVS29+318C>G  |
|             |       | C3-15     | rs11569523 | IVS27+1598G>A |
|             |       | C3-02     | rs11569521 | IVS27+1153C>G |
|             |       | C3-13     | rs3745568  | IVS27+27A>C   |
|             |       | C3-14     | rs423490   | Ex21-52T>C    |
|             |       | C3-12     | rs366510   | IVS19-24C>A   |
|             |       | C3-01     | rs11569450 | IVS18+27C>G   |
|             |       | C3-03     | rs11672613 | IVS17+1841A>G |
|             |       | C3-05     | rs2230205  | Ex14-10G>A    |
|             |       | C3-07     | rs2250656  | IVS2-111A>G   |
|             |       | C3-16     | rs163913   | -2034G>A      |
|             |       | GPR108-01 | rs171094   | *2719T>C      |
| C4BPA/C4BPB | C4BPA | C4BPA-04  | rs17020993 | IVS3-369A>G   |
|             |       | C4BPA-08  | rs2842704  | IVS4+576G>A   |
|             |       | C4BPA-11  | rs4259650  | IVS4-3771A>G  |
|             |       | C4BPA-10  | rs4425986  | IVS4-3487C>T  |

|      |       |          |            |               |
|------|-------|----------|------------|---------------|
|      |       | C4BPA-09 | rs2842707  | IVS5-36G>C    |
|      |       | C4BPA-01 | rs1126618  | Ex6-32T>C     |
|      |       | C4BPA-07 | rs2491393  | IVS7+19A>G    |
|      |       | C4BPA-03 | rs12087872 | IVS8-1216A>G  |
|      | C4BPB | C4BPB-04 | rs4142863  | -7222C>T      |
|      |       | C4BPB-03 | rs2842754  | -5573T>C      |
|      |       | C4BPB-02 | rs2808467  | *526G>T       |
|      |       | C4BPB-01 | rs12063780 | *2019C>G      |
| C5   | C5    | C5-10    | rs7026551  | IVS31-604T>G  |
|      |       | C5-08    | rs2269066  | IVS30+39G>A   |
|      |       | C5-07    | rs2159776  | IVS22+2358G>A |
|      |       | C5-14    | rs7040033  | IVS21-466C>T  |
|      |       | C5-12    | rs7031036  | IVS20+4003G>C |
|      |       | C5-03    | rs12685344 | IVS20+3206C>T |
|      |       | C5-01    | rs10116271 | IVS15+384G>A  |
|      |       | C5-09    | rs2416810  | IVS10+482C>T  |
|      |       | C5-04    | rs1468673  | IVS1-1229G>A  |
| C5R1 | C5R1  | C5R1-01  | rs4427917  | IVS1+2560G>C  |
| C6   | C6    | C6-16    | rs9200     | Ex18-271G>A   |
|      |       | C6-09    | rs3805711  | IVS17+3066G>A |
|      |       | C6-15    | rs918608   | IVS15+1223T>C |
|      |       | C6-08    | rs2301247  | IVS14-428A>G  |
|      |       | C6-10    | rs3805715  | IVS13+287T>C  |
|      |       | C6-19    | rs6865420  | IVS13+204T>G  |
|      |       | C6-12    | rs6451566  | IVS9-4732A>G  |
|      |       | C6-06    | rs17260228 | IVS9+3223G>A  |
|      |       | C6-11    | rs4413571  | IVS5-1647A>T  |
|      |       | C6-03    | rs13168926 | IVS4-1040T>C  |
|      |       | C6-13    | rs6451568  | IVS4+1646G>A  |
|      |       | C6-14    | rs7443604  | IVS4+858C>A   |
|      |       | C6-04    | rs1444903  | IVS1-951G>A   |
|      |       | C6-07    | rs1822821  | IVS1-1309C>G  |
|      |       | C6-02    | rs10512766 | IVS1+143G>C   |
|      |       | C6-18    | rs16871019 | -14082T>C     |
|      |       | C6-20    | rs7444800  | -14356T>C     |
|      |       | C6-17    | rs10071904 | -16607T>C     |
| C7   | C7    | C7-14    | rs13175903 | -1772G>A      |
|      |       | C7-13    | rs12153063 | -1518A>C      |
|      |       | C7-03    | rs1910016  | IVS1+1874C>T  |
|      |       | C7-02    | rs16870514 | IVS1+5447G>A  |
|      |       | C7-18    | rs9292794  | IVS1+7026T>C  |
|      |       | C7-04    | rs2455307  | IVS2+806G>A   |
|      |       | C7-06    | rs2675982  | IVS12+556C>T  |
|      |       | C7-08    | rs324058   | IVS12-293C>A  |
|      |       | C7-09    | rs3805221  | IVS14+343C>T  |
|      |       | C7-10    | rs3828511  | IVS15-517G>T  |
|      |       | C7-11    | rs6860438  | IVS16-165G>T  |
|      |       | C7-12    | rs971075   | IVS17+574A>G  |
|      |       | C7-01    | rs1450665  | IVS17-391G>T  |
|      |       | C7-17    | rs7732104  | *1760A>G      |

|           |            |             |            |              |              |               |
|-----------|------------|-------------|------------|--------------|--------------|---------------|
| C8A/C8B   | C8A        | C7-15       | rs2122564  | *5698C>T     |              |               |
|           |            | C8A-08      | rs671137   | -1094T>C     |              |               |
|           |            | C8A-03      | rs622299   | IVS1-5160C>T |              |               |
|           |            | C8A-02      | rs1885002  | IVS2-241A>G  |              |               |
|           |            | C8A-01      | rs10489624 | IVS6+260T>C  |              |               |
|           |            | C8A-05      | rs6696110  | IVS7+7321T>G |              |               |
|           |            | C8A-06      | rs6699859  | IVS7+8610T>C |              |               |
|           |            | C8A-07      | rs679350   | IVS7-7528G>A |              |               |
|           |            | C8A-04      | rs624298   | IVS9+748A>G  |              |               |
|           |            | C8B         | C8B-12     | rs911248     | *2567A>C     |               |
|           |            |             | C8B-04     | rs641714     | IVS11-519C>G |               |
|           |            |             | C8B-06     | rs652553     | IVS9-461A>G  |               |
|           |            |             | C8B-02     | rs17301153   | IVS9-1823G>A |               |
|           | C8B-09     |             | rs9661996  | IVS9-1949G>T |              |               |
|           | C8B-07     |             | rs658285   | IVS5-910C>T  |              |               |
|           | C8G        | C8G         | C8B-05     | rs647571     | IVS4+752A>G  |               |
|           |            |             | C8B-01     | rs1013579    | Ex3-43G>A    |               |
|           |            |             | C8B-08     | rs683916     | IVS2+219T>A  |               |
|           |            |             | C8B-11     | rs1984266    | -1473C>T     |               |
| C8B-10    |            |             | rs1774916  | -8211A>G     |              |               |
| C8G-01    |            |             | rs2071006  | Ex1-7T>G     |              |               |
| C9        |            |             | C9         | C9-10        | rs17383601   | *1441G>C      |
|           |            |             |            | C9-05        | rs187451     | IVS9+3789A>C  |
|           |            |             |            | C9-07        | rs261753     | IVS5+6436A>G  |
|           |            |             |            | C9-06        | rs261752     | IVS5+3272T>C  |
|           | C9-02      | rs11953839  |            | IVS5+2340C>T |              |               |
|           | C9-09      | rs4957473   |            | IVS1-865T>C  |              |               |
|           | DAB2       | DAB2        |            | DAB2-03      | rs700238     | *6017G>C      |
|           |            |             |            | DAB2-01      | rs1046033    | *2970C>T      |
|           |            |             |            | DAB2-04      | rs700239     | IVS14-162G>T  |
|           |            |             |            | CARD15       | CARD15       | CARD15-37     |
| CARD15-34 | rs17312836 | IVS2-304A>C |            |              |              |               |
| CARD15-22 | rs751271   | IVS6+290T>G |            |              |              |               |
| CARD15-38 | rs8056611  | *1916A>G    |            |              |              |               |
| CARD15-39 | rs718226   | *3832A>G    |            |              |              |               |
| CARD4     | CARD4      | CARD4-10    | rs5743369  |              |              | IVS13+806A>G  |
|           |            | CARD4-01    | rs10267377 |              |              | IVS12-1796C>G |
|           |            | CARD4-05    | rs2907749  | IVS9+16T>C   |              |               |
|           |            | CARD4-02    | rs2075821  | Ex6-480G>A   |              |               |
|           |            | CARD4-12    | rs7789045  | IVS5+731A>T  |              |               |
|           |            | CARD4-07    | rs3823773  | IVS1-304A>G  |              |               |
|           |            | CARD4-11    | rs6949758  | IVS1-2022C>G |              |               |
|           |            | CARD4-09    | rs4722986  | IVS1-4866C>T |              |               |
|           |            | CARD4-04    | rs2529440  | IVS1+6428G>A |              |               |
|           |            | CARD4-08    | rs4720004  | IVS1+6003A>G |              |               |
|           |            | CARD4-06    | rs2970503  | IVS1+5013C>T |              |               |
|           |            | CARD4-03    | rs2256023  | IVS1+3231A>G |              |               |
|           |            | CCL18       | CCL18      | CCL18-03     | rs8073066    | -8410C>T      |
|           |            |             |            | CCL18-01     | rs2015070    | IVS1+14C>T    |
|           |            |             |            | CCL18-02     | rs11080372   | *4637A>G      |

|                                         |          |            |            |             |             |
|-----------------------------------------|----------|------------|------------|-------------|-------------|
| CCL2/CCL7<br>/CCL11/CCL8<br>/CCL13/CCL1 | CCL2     | CCL18-05   | rs854477   | *4756A>G    |             |
|                                         |          | CCL2-01    |            | -9513A>G    |             |
|                                         |          | CCL2-03    |            | -6609C>T    |             |
|                                         | CCL7     | CCL2-02    |            |             | -5795T>A    |
|                                         |          | CCL2-04    | rs991804   |             | *3878T>C    |
|                                         |          | CCL7-02    | rs2190970  |             | -2646T>C    |
|                                         |          | CCL7-03    | rs3091322  |             | *1038A>G    |
|                                         |          | CCL7-04    | rs3091324  |             | *2094G>T    |
|                                         |          | CCL7-05    | rs3091327  |             | *2420A>G    |
|                                         | CCL11    | CCL7-06    | rs8081047  |             | *4093C>T    |
|                                         |          | CCL11-04   | rs3091328  |             | -9106A>G    |
|                                         |          | CCL11-01   | rs12948058 |             | -1960A>G    |
|                                         |          | CCL11-05   | rs4795895  |             | -1381A>G    |
|                                         |          | CCL11-06   | rs4795896  |             | -575C>T     |
|                                         |          | CCL11-03   | rs17735961 |             | -487A>C     |
|                                         |          | CCL11-02   | rs16969415 |             | -425C>T     |
|                                         |          | CCL11-08   | rs714910   |             | *2555A>C    |
|                                         | CCL8     | CCL11-07   | rs4795904  |             | *4271A>G    |
| CCL8-07                                 |          | rs885691   |            | -5295T>C    |             |
| CCL8-03                                 |          | rs3138034  |            | -3795C>T    |             |
| CCL8-06                                 |          | rs8082480  |            | -3660A>C    |             |
| CCL8-04                                 |          | rs3138035  |            | -571C>T     |             |
| CCL13                                   | CCL8-01  | rs3138037  |            | IVS2-77T>C  |             |
|                                         | CCL13-02 | rs442319   |            | -8073A>G    |             |
| CCL20                                   | CCL13-01 |            |            | -1039A>G    |             |
|                                         | CCL1     | CCL1-04    | rs408121   | *10429T>C   |             |
|                                         | CCL24    | CCL1-03    | rs365654   |             | *9868T>C    |
|                                         |          | CCL1-01    | rs2282691  |             | IVS2+495A>T |
|                                         |          | CCL1-05    | rs7502772  |             | -8883T>C    |
|                                         | CCL26    | CCL1-02    | rs12603965 |             | -10029G>A   |
|                                         |          | CCL20-03   | rs13389224 |             | -9592C>T    |
| CCL20-04                                |          | rs1827924  |            | -8892A>G    |             |
| CCL20-02                                |          | rs13034664 |            | -6048A>G    |             |
| CCL20-06                                |          | rs6749704  |            | -785C>T     |             |
| CCL24                                   | CCL20-07 | rs940339   |            | *3462T>C    |             |
|                                         | CCL24-04 | rs13340508 |            | *3428G>A    |             |
|                                         | CCL24-06 | rs7797547  |            | *3313T>C    |             |
|                                         | CCL24-03 | rs13340490 |            | *1442T>C    |             |
|                                         | CCL24-01 | rs11465307 |            | IVS2-512T>C |             |
| CCL5                                    | CCL24-02 | rs2302004  |            | IVS1+106T>C |             |
|                                         | CCL26-03 | rs11465353 |            | *361G>T     |             |
|                                         | CCL26-02 | rs11465352 |            | *288G>T     |             |
| CCR1/CCR3                               | CCL26-01 | rs2240478  |            | IVS2+4C>T   |             |
|                                         | CCL5-05  | rs4795095  |            | *2080T>C    |             |
| CCR1/CCR3                               | CCL5-03  | rs2107538  |            | -470G>A     |             |
|                                         | CCR1     | CCR1-03    | rs3136673  |             | *2120A>G    |
|                                         |          | CCR1-02    | rs3136671  |             | *1561A>G    |
|                                         |          | CCR1-04    | rs3181077  |             | -4847A>G    |
|                                         | CCR3     | CCR3-15    | rs1979672  |             | -32540A>G   |
|                                         |          | CCR3-14    | rs1979671  |             | -32434T>C   |

|       |         |            |            |              |
|-------|---------|------------|------------|--------------|
|       |         | CCR3-12    | rs1388604  | -29771T>A    |
|       |         | CCR3-16    | rs9842716  | -24475A>G    |
|       |         | CCR3-07    | rs13073976 | IVS1+2634T>C |
|       |         | CCR3-10    | rs6441948  | IVS1-7979A>G |
|       |         | CCR3-13    | rs1907635  | IVS1-5640T>C |
|       |         | CCR3-08    | rs13326331 | IVS1-5195C>T |
|       |         | CCR3-11    | rs12489891 | *2800C>G     |
| CCR4  | CCR4    | CCR4-01    | rs2228428  | Ex2-476C>T   |
|       |         | CCR4-02    | rs6770096  | *511C>T      |
| CCR6  | CCR6    | CCR6-14    | rs9459883  | -19105C>G    |
|       |         | CCR6-11    | rs3093024  | -16829G>A    |
|       |         | CCR6-05    | rs1855025  | IVS1+883A>G  |
|       |         | CCR6-12    | rs3798315  | IVS1-4817C>T |
|       |         | CCR6-02    | rs3093012  | IVS1-1245A>G |
|       |         | CCR6-01    | rs3093010  | IVS1-919C>A  |
|       |         | CCR6-10    | rs3093009  | IVS1-49A>G   |
|       |         | CCR6-09    | rs3093007  | Ex3+48T>C    |
|       |         | CCR6-07    | rs3093003  | *2630A>G     |
|       |         | CCR6-06    | rs3093002  | *3216A>G     |
|       |         | CCR6-03    | rs367523   | *3932C>G     |
| CCR7  | CCR7    | CCR7-01    | rs2023906  | IVS2+1459C>T |
|       |         | CCR7-04    | rs588019   | IVS2+38C>T   |
|       |         | CCR7-02    | rs2290065  | IVS1-1166C>T |
|       |         | CCR7-03    | rs3136685  | IVS1+1853G>A |
| CCR8  | CCR8    | CCR8-04    | rs872066   | -5301A>G     |
| CCR9  | CCR9    | CCR9-12    | rs9842595  | -13734T>G    |
|       |         | CCR9-08    | rs1860264  | -13340A>C    |
|       |         | CCR9-13    | rs9868455  | -12214C>T    |
|       |         | CCR9-10    | rs6441929  | -11634A>G    |
|       |         | CCR9-01    | rs12638201 | IVS1-2119G>A |
|       |         | CCR9-04    | rs2236938  | IVS2+2493G>A |
|       |         | CCR9-06    | rs7614342  | IVS2-1485A>T |
|       |         | CCR9-11    | rs875890   | *1896T>A     |
|       |         | CCR9-09    | rs4683147  | *4873A>G     |
| CD14  | CD14    | CD14-06    | rs4914     | Ex2-148G>C   |
|       |         | CD14-03    | rs2569190  | -259T>C      |
|       | PRO1580 | PRO1580-01 | rs3822356  | IVS6-56A>G   |
| CD180 | CD180   | CD180-07   | rs1560160  | *5547C>A     |
|       |         | CD180-12   | rs6890674  | *2833T>A     |
|       |         | CD180-01   | rs1697143  | IVS2+610C>A  |
|       |         | CD180-06   | rs1428469  | IVS1+2287A>G |
|       |         | CD180-10   | rs3756561  | -610G>A      |
|       |         | CD180-08   | rs1697142  | -3377A>G     |
|       |         | CD180-04   | rs10058233 | -6013G>A     |
|       |         | CD180-09   | rs1705392  | -7798G>C     |
|       |         | CD180-05   | rs10223101 | -9350G>A     |
| CD209 | CD209   | CD209-11   | rs8112310  | *3604A>T     |
|       |         | CD209-03   | rs4804802  | Ex7+517T>C   |
|       |         | CD209-04   | rs8105483  | IVS5-178G>C  |
|       |         | CD209-07   | rs2287886  | -138T>C      |



|             |         |            |            |              |
|-------------|---------|------------|------------|--------------|
|             |         | CD209-10   | rs735240   | -938T>C      |
|             |         | CD209-06   | rs11881682 | -2978T>C     |
|             |         | CD209-08   | rs4804805  | -4148T>C     |
|             |         | CD209-09   | rs4804806  | -4227T>C     |
| SECTM1      | SECTM1  | SECTM1-05  | rs4452007  | IVS2-304A>G  |
|             |         | SECTM1-03  | rs6502097  | IVS1-1011G>C |
|             |         | SECTM1-02  | rs4789763  | IVS1+2292T>C |
|             |         | SECTM1-04  | rs12450996 | -8992T>C     |
| CENTA1      | CENTA1  | CENTA1-01  | rs10279968 | IVS4-5759G>C |
| CLCA1/CLCA2 | CLCA1   | CLCA1-23   | rs4393129  | -4741C>T     |
|             |         | CLCA1-22   | rs3753276  | -2389T>C     |
|             |         | CLCA1-21   | rs2791519  | IVS1+35T>G   |
|             |         | CLCA1-03   | rs1358826  | IVS2+1431T>C |
|             |         | CLCA1-08   | rs2753377  | IVS2-260T>A  |
|             |         | CLCA1-09   | rs2753384  | IVS4-1259C>T |
|             |         | CLCA1-16   | rs926065   | IVS4-643G>T  |
|             |         | CLCA1-12   | rs3765989  | IVS5+2127A>T |
|             |         | CLCA1-04   | rs2734690  | IVS5+2199G>A |
|             |         | CLCA1-02   | rs1321695  | IVS5-141C>A  |
|             |         | CLCA1-05   | rs2734697  | IVS6+718A>T  |
|             |         | CLCA1-19   | rs2734700  | IVS6-706G>A  |
|             |         | CLCA1-20   | rs2734704  | IVS6-394A>G  |
|             |         | CLCA1-11   | rs2791494  | Ex11+107T>C  |
|             |         | CLCA1-01   | rs1321690  | IVS11+142C>A |
|             |         | CLCA1-10   | rs2791491  | IVS13+973G>T |
|             |         | CLCA1-18   | rs2246583  | *987C>G      |
|             |         | CLCA1-17   | rs17129266 | *3381C>G     |
|             | CLCA2   | CLCA2-01   | rs12728761 | *6634C>G     |
| CNTNAP1     | CNTNAP1 | CNTNAP1-03 | rs4028634  | IVS1-190T>C  |
|             |         | CNTNAP1-02 | rs3760386  | IVS11-22G>A  |
| CRP         | CRP     | CRP-16     | rs3093077  | *3678G>T     |
|             |         | CRP-15     | rs2808630  | *2446A>G     |
|             |         | CRP-03     | rs1205     | Ex2-155G>A   |
|             |         | CRP-02     | rs1800947  | Ex2+491G>C   |
|             |         | CRP-14     | rs1417938  | IVS1+29A>T   |
| CTNNB1      | CTNNB1  | CTNNB1-23  | rs13072632 | IVS1-3068T>C |
|             |         | CTNNB1-13  | rs4135385  | IVS13-67A>G  |
| CYBA        | CYBA    | CYBA-08    | rs12709102 | IVS5+205A>G  |
|             |         | CYBA-14    | rs3794624  | IVS1+290C>T  |
|             | IL17C   | IL17C-01   | rs2254073  | IVS2+87T>C   |
|             | MVD     | MVD-02     | rs8854     | Ex10+149G>A  |
|             |         | MVD-01     | rs3736112  | IVS6+52G>A   |
| CYP21A2     | CYP21A2 | CYP21A2-04 | rs6474     | Ex3+16G>->A  |
|             |         | CYP21A2-06 | rs12525076 | IVS5+35A>G   |
| DAF         | DAF     | DAF-01     | rs4844592  | IVS5+1029T>A |
|             |         | DAF-02     | rs11117564 | *4015A>C     |
| DEF6        | DEF6    | DEF6-02    | rs9380500  | IVS1+502G>C  |
|             |         | DEF6-04    | rs6938946  | IVS5+148C>T  |
|             |         | DEF6-03    | rs6915410  | *3016C>T     |
|             | ZNF76   | ZNF76-01   | rs729925   | IVS5-1109C>A |

|          |                 |             |            |               |            |             |
|----------|-----------------|-------------|------------|---------------|------------|-------------|
| DEFA3    | DEFA3           | DEFA3-08    | rs4841815  | -3505G>A      |            |             |
|          |                 | DEFA3-11    | rs7825750  | -5430G>A      |            |             |
|          |                 | DEFA3-12    | rs7841223  | -7022T>C      |            |             |
|          |                 | DEFA3-05    | rs4288398  | -7265T>C      |            |             |
|          |                 | DEFA3-13    | rs883182   | -8020C>G      |            |             |
|          |                 | DEFA3-06    | rs4332159  | -8476T>C      |            |             |
|          |                 | DEFA3-02    | rs17382179 | -9364G>C      |            |             |
|          |                 | DEFA3-10    | rs6984215  | -10505G>A     |            |             |
|          |                 | DEFA3-09    | rs6605579  | -10751T>G     |            |             |
|          |                 | DEFA4/DEFA6 | DEFA4      | DEFA4-04      | rs2738112  | *5147C>T    |
| DEFA4-05 | rs2741683       |             |            | *5061A>G      |            |             |
| DEFA4-06 | rs4526381       |             |            | *4173G>A      |            |             |
| DEFA4-03 | rs2702860       |             |            | *3299G>A      |            |             |
| DEFA4-02 | rs13251447      |             |            | *2831T>G      |            |             |
| DEFA6    | DEFA4-01        |             | rs2738100  | Ex3+83T>C     |            |             |
|          | DEFA6-09        |             | rs2741692  | *2232C>T      |            |             |
|          | DEFA6-03        |             | rs13275170 | *2095G>A      |            |             |
|          | DEFA6-01        |             | rs712276   | Ex2-53T>C     |            |             |
|          | DEFA6-06        |             | rs2738120  | IVS1-187C>G   |            |             |
|          | DEFA6-02        |             | rs11784359 | -78C>A        |            |             |
|          | DEFA6-08        |             | rs2741689  | -698A>G       |            |             |
|          | DEFA6-07        |             | rs2741688  | -1794A>G      |            |             |
|          | DEFA6-05        |             | rs2738116  | -2859C>T      |            |             |
|          | DEFA6-10        |             | rs3918350  | -3223G>A      |            |             |
|          | DEFA6-04        |             | rs2702938  | -3517G>A      |            |             |
|          | DEFA5           |             | DEFA5      | DEFA5-02      | rs10503360 | *4897A>C    |
|          |                 |             |            | DEFA5-07      | rs9644778  | *3298T>G    |
|          |                 |             |            | DEFA5-01      | rs10095331 | IVS1+198T>C |
| DEFA5-04 |                 | rs4610776   |            | -457T>A       |            |             |
| DEFA5-06 |                 | rs7834209   |            | -5528C>A      |            |             |
| DEFA5-03 |                 | rs4240691   |            | -7184G>A      |            |             |
| DEFB1    |                 | DEFB1       |            | DEFB1-06      | rs2741109  | *3587T>C    |
|          | DEFB1-02        |             | rs2702833  | *3146C>A      |            |             |
|          | DEFB1-07        |             | rs2741112  | *2685G>C      |            |             |
|          | DEFB1-01        |             | rs2702829  | *997T>C       |            |             |
|          | DEFB1-12        |             | rs2980924  | IVS1+3326T>C  |            |             |
|          | DEFB1-11        |             | rs5743407  | -1655C>G      |            |             |
|          | DEFB1-08        |             | rs2977826  | -4694A>G      |            |             |
|          | DEFB1-09        |             | rs2978858  | -5236C>G      |            |             |
|          | DEFB1-04        |             | rs2738169  | -7178C>T      |            |             |
|          | DEFB1-13        |             | rs7826831  | -7728G>A      |            |             |
|          | DEFB1-03        |             | rs2738163  | -9836A>G      |            |             |
|          | DEFB118/DEFB119 |             | DEFB118    | DEFB118-01    | rs6057649  | IVS1-202C>A |
|          |                 |             | DEFB119    | DEFB119-01    | rs709045   | Ex4-48A>G   |
| DEFB126  | DEFB126         | DEFB126-02  | rs16994490 | *2729A>G      |            |             |
|          |                 | DEFB126-03  | rs6054706  | *3530C>T      |            |             |
|          |                 | DEFB126-01  | rs13036802 | *6441C>T      |            |             |
| DEFB127  | DEFB127         | DEFB127-01  | rs1434789  | -285G>T       |            |             |
| DLG5     | DLG5            | DLG5-02     | rs1248623  | IVS19-1378A>G |            |             |
|          |                 | DLG5-01     | rs11002306 | IVS8-888T>A   |            |             |

|          |           |            |            |               |             |          |
|----------|-----------|------------|------------|---------------|-------------|----------|
|          |           | DLG5-06    | rs1248650  | -6164T>C      |             |          |
| FCER1A   | FCER1A    | FCER1A-01  | rs16841987 | IVS1+5723G>A  |             |          |
|          |           | FCER1A-05  | rs7548864  | IVS1-4841G>A  |             |          |
|          |           | FCER1A-03  | rs2251746  | IVS1-36T>C    |             |          |
|          |           | FCER1A-04  | rs2494250  | *528C>G       |             |          |
|          |           | FCER1A-02  | rs16842010 | *2271C>T      |             |          |
|          | OR10J3    | OR10J3-02  | rs2494251  | *2308T>C      |             |          |
|          |           | OR10J3-01  | rs2427829  | *1448T>C      |             |          |
| FCER1G   | APOA2     | APOA2-04   | rs6413453  | IVS3-4C>T     |             |          |
|          |           | APOA2-06   | rs5085     | IVS3+197G>C   |             |          |
|          |           | APOA2-02   | rs5082     | -491C>T       |             |          |
|          | FCER1G    | FCER1G-04  | rs11587213 | -236A>G       |             |          |
|          |           | FCER1G-01  | rs12094497 | IVS1+1143G>A  |             |          |
|          |           | FCER1G-02  | rs2070902  | IVS1-111C>T   |             |          |
|          |           | FCER1G-03  | rs3557     | Ex5-146T>G    |             |          |
|          |           | FCER1G-06  | rs4489574  | *979C>T       |             |          |
|          |           | FCER1G-07  | rs7528588  | *1200C>G      |             |          |
|          |           |            | FCER1G-05  | rs12721035    | *2605T>C    |          |
|          |           | NDUFS2     | NDUFS2-03  | rs4656993     | IVS3-60A>G  |          |
|          |           |            | NDUFS2-01  | rs16832694    | IVS4+419A>G |          |
|          |           |            | NDUFS2-02  | rs3924264     | IVS4-299T>C |          |
|          |           |            | NDUFS2-04  | rs4656994     | IVS7-24G>A  |          |
|          | FCER2     | FCER2      | FCER2-11   | rs1078625     | *2015T>C    |          |
| FCER2-04 |           |            | rs12971845 | IVS8-2896A>G  |             |          |
| FCER2-02 |           |            | rs11260013 | IVS8+2035G>A  |             |          |
| FCER2-05 |           |            | rs12984649 | IVS8+255C>T   |             |          |
| FCER2-09 |           |            | rs7249320  | IVS4+197G>T   |             |          |
| FCER2-12 |           |            | rs12984870 | IVS2-417T>C   |             |          |
| FCER2-10 |           |            | rs12980031 | IVS2+189C>A   |             |          |
| FCER2-07 |           |            | rs2287868  | IVS1-41A>G    |             |          |
| FCER2-03 |           |            | rs11672997 | IVS1-134C>T   |             |          |
| FCER2-06 |           |            | rs1990975  | IVS1+631A>G   |             |          |
| FCER2-13 |           |            | rs4804221  | -4541G>A      |             |          |
| FCER2-14 |           |            | rs753733   | -4919T>C      |             |          |
| FCGR2A   |           |            | FCGR2A     | FCGR2A-13     | rs7551957   | -5215C>T |
|          |           |            |            | FCGR2A-10     | rs10800309  | -3099G>A |
|          | FCGR2A-06 | rs4656308  |            | IVS3-859C>T   |             |          |
|          | FCGR2A-11 | rs12142755 |            | IVS5+997A>G   |             |          |
|          | FCGR2A-03 | rs12029217 |            | Ex7+99C>T     |             |          |
|          |           | HSPA6      |            | HSPA6-03      | rs12129787  | -1861C>T |
|          |           |            |            | HSPA6-01      | rs10737548  | -903C>T  |
| FCGRT    | FCGRT     | FCGRT-03   | rs2946863  | -3612G>C      |             |          |
|          |           | FCGRT-02   | rs2335534  | -1680A>G      |             |          |
|          |           | FCGRT-01   | rs3810194  | IVS4+7T>C     |             |          |
| FGF2     | FGF2      | FGF2-18    | rs308447   | -9384T>C      |             |          |
|          |           | FGF2-09    | rs308428   | IVS1+16001A>G |             |          |
|          |           | FGF2-01    | rs11938826 | IVS1+24107C>G |             |          |
|          |           | FGF2-02    | rs167428   | IVS1-24037T>C |             |          |
|          |           | FGF2-12    | rs308441   | IVS1-23411C>T |             |          |
|          |           | FGF2-03    | rs17006215 | IVS1-22043G>A |             |          |

|                       |        |           |            |               |
|-----------------------|--------|-----------|------------|---------------|
|                       |        | FGF2-07   | rs308379   | IVS1-14580A>T |
|                       |        | FGF2-14   | rs3789138  | IVS1-12755A>G |
|                       |        | FGF2-17   | rs308388   | IVS1-10397G>A |
|                       |        | FGF2-04   | rs17006255 | IVS2+1414A>C  |
|                       | NUDT6  | NUDT6-02  | rs11737764 | IVS4+6943A>G  |
|                       |        | NUDT6-01  | rs11098676 | IVS4+569A>G   |
| FOXJ2                 | FOXJ2  | FOXJ2-01  | rs11057065 | *2797C>T      |
| GPR44                 | GPR44  | GPR44-01  | rs533116   | -6387G>A      |
|                       | ZP1    | ZP1-02    | rs679682   | -4638T>C      |
|                       |        | ZP1-01    | rs530880   | -2893T>C      |
| HES7                  | HES7   | HES7-01   | rs1442849  | *767G>A       |
|                       |        | HES7-02   | rs3027279  | -190A>C       |
| HGF                   | HGF    | HGF-09    | rs5745752  | IVS16+143G>A  |
|                       |        | HGF-02    | rs2074724  | IVS15+341G>A  |
|                       |        | HGF-15    | rs5745696  | IVS9+861G>A   |
|                       |        | HGF-01    | rs12707453 | IVS8+2588T>C  |
|                       |        | HGF-06    | rs5745646  | Ex5+253G>A    |
|                       |        | HGF-04    | rs5745616  | IVS1+844G>A   |
|                       |        | HGF-13    | rs3735520  | -1651C>T      |
|                       |        | HGF-10    | rs11763015 | -2141C>A      |
|                       |        | HGF-12    | rs17501108 | -4606C>A      |
|                       |        | HGF-17    | rs7790870  | -5624G>C      |
|                       |        | HGF-11    | rs1558001  | -7792G>A      |
| ICAM1/ICAM4<br>/ICAM5 | ICAM1  | ICAM1-15  |            | IVS2-3499C>G  |
|                       |        | ICAM1-16  |            | Ex7+546C>T    |
|                       |        | ICAM1-32  | rs3093030  | *1439C>T      |
|                       | ICAM4  | ICAM4-01  | rs281438   | *594G>T       |
|                       | ICAM5  | ICAM5-08  | rs281440   | -415G>A       |
| ICAM2                 | ICAM2  | ICAM2-03  | rs3181027  | *3597C>A      |
|                       |        | ICAM2-02  | rs3764868  | IVS3+290C>T   |
| ICAM3                 | ICAM3  | RAVER1-01 | rs3181049  | IVS2+19C>T    |
|                       |        | ICAM3-01  | rs2230399  | Ex7+133G>C    |
|                       |        | ICAM3-03  | rs281413   | IVS2-82C>T    |
|                       |        | ICAM3-06  | rs2304240  | Ex2-35T>C     |
|                       |        | ICAM3-05  | rs3176766  | IVS1-154C>T   |
|                       |        | ICAM3-04  | rs281414   | Ex1+23C>T     |
|                       | TYK2   | TYK2-63   | rs4611572  | *3592C>G      |
| IL11RA                | IL11RA | IL11RA-02 | rs11575584 | *498A>G       |
|                       |        | IL11RA-06 | rs913836   | *3176C>T      |
|                       |        | IL11RA-04 | rs4879816  | *8632A>C      |
| IL8                   | IL8    | IL8-33    | rs4694178  | *4506A>C      |
| IL8RA/IL8RB           | IL8RA  | IL8RA-25  | rs1008563  | *1993C>T      |
|                       |        | IL8RA-14  | rs1008562  | *1909G>C      |
|                       |        | IL8RA-04  | rs2854386  | *1379G>C      |
|                       | IL8RB  | IL8RB-05  | rs4674257  | -10750A>G     |
|                       |        | IL8RB-07  | rs6761387  | IVS2+2465C>T  |
|                       |        | IL8RB-06  | rs4674261  | *4401C>G      |
| IRAK2                 | IRAK2  | IRAK2-01  | rs457414   | -3754A>C      |
|                       |        | IRAK2-02  | rs11465853 | IVS1+249G>C   |
|                       |        | IRAK2-18  | rs3844280  | IVS1+5526C>T  |

|       |       |          |            |               |
|-------|-------|----------|------------|---------------|
|       |       | IRAK2-21 | rs708030   | IVS1+5762C>T  |
|       |       | IRAK2-15 | rs2619508  | IVS1-3572T>G  |
|       |       | IRAK2-28 | rs1169670  | IVS2+3903G>C  |
|       |       | IRAK2-12 | rs155266   | IVS2+11024T>A |
|       |       | IRAK2-10 | rs1144911  | IVS2-7988G>A  |
|       |       | IRAK2-16 | rs263410   | IVS2-66A>C    |
|       |       | IRAK2-17 | rs263413   | IVS3+512G>A   |
|       |       | IRAK2-24 | rs7373858  | IVS3-1289G>A  |
|       |       | IRAK2-14 | rs2302862  | IVS6-125T>C   |
|       |       | IRAK2-19 | rs3844283  | Ex9-36C>G     |
|       |       | IRAK2-27 | rs779905   | IVS9-38C>T    |
|       |       | IRAK2-26 | rs779904   | IVS10+660T>C  |
|       |       | IRAK2-25 | rs776514   | IVS10-668T>C  |
|       |       | IRAK2-22 | rs708035   | Ex11+21T>A    |
|       |       | IRAK2-11 | rs11706450 | IVS11+1523T>C |
|       |       | IRAK2-23 | rs713016   | IVS11-1736C>T |
| IRAK3 | IRAK3 | IRAK3-10 | rs1732893  | -9623C>A      |
|       |       | IRAK3-09 | rs1436849  | -7961C>T      |
|       |       | IRAK3-07 | rs11176078 | -7822C>T      |
|       |       | IRAK3-12 | rs2701652  | -2202G>C      |
|       |       | IRAK3-03 | rs1168758  | IVS1-3357C>G  |
|       |       | IRAK3-04 | rs1732877  | IVS2+1471T>C  |
|       |       | IRAK3-08 | rs1152888  | Ex5+3A>G      |
|       |       | IRAK3-05 | rs3782347  | IVS8-6350A>G  |
|       |       | IRAK3-11 | rs17826057 | IVS8-5102G>A  |
|       |       | IRAK3-01 | rs1152912  | IVS8-4358A>G  |
|       |       | IRAK3-02 | rs1152918  | IVS8-1964T>C  |
|       |       | IRAK3-06 | rs10506481 | *2159C>T      |
| IRAK4 | IRAK4 | IRAK4-02 | rs4251460  | IVS2+693A>C   |
|       |       | IRAK4-01 | rs4238087  | IVS2-718A>G   |
|       |       | IRAK4-05 | rs1461567  | IVS2-334G>A   |
|       |       | IRAK4-03 | rs4251513  | IVS8-1906G>C  |
|       | PTK9  | PTK9-01  | rs17121283 | *3794G>A      |
| ITGB2 | ITGB2 | ITGB2-27 | rs440555   | *4540C>T      |
|       |       | ITGB2-28 | rs441019   | *4253T>A      |
|       |       | ITGB2-26 | rs2117341  | *3889C>T      |
|       |       | ITGB2-25 | rs125810   | *2633T>C      |
|       |       | ITGB2-05 | rs235325   | IVS11+460T>C  |
|       |       | ITGB2-16 | rs4818740  | IVS10+178T>A  |
|       |       | ITGB2-06 | rs235328   | IVS9-498C>G   |
|       |       | ITGB2-21 | rs2838727  | IVS8-932G>A   |
|       |       | ITGB2-02 | rs170963   | IVS8+836A>G   |
|       |       | ITGB2-22 | rs2838729  | IVS7-340T>C   |
|       |       | ITGB2-03 | rs2026882  | IVS5+427G>A   |
|       |       | ITGB2-13 | rs3746972  | IVS3-825T>C   |
|       |       | ITGB2-19 | rs760462   | IVS3-1089A>G  |
|       |       | ITGB2-18 | rs760458   | IVS3+1282G>T  |
|       |       | ITGB2-17 | rs760456   | IVS3+784C>G   |
|       |       | ITGB2-10 | rs2838734  | IVS3+459A>G   |
|       |       | ITGB2-14 | rs3788150  | IVS1-3102A>C  |

|            |       |          |            |              |
|------------|-------|----------|------------|--------------|
|            |       | ITGB2-11 | rs2838735  | IVS1-4582A>G |
|            |       | ITGB2-12 | rs2838737  | IVS1-4880A>G |
|            |       | ITGB2-01 | rs1474552  | IVS1+3446A>G |
|            |       | ITGB2-15 | rs3788151  | IVS1+3171G>A |
|            |       | ITGB2-20 | rs2070946  | -10499A>G    |
|            |       | ITGB2-23 | rs2838739  | -13952T>C    |
| JAK3       | JAK3  | INSL3-01 | rs2286662  | Ex1-13A>G    |
|            |       | INSL3-02 | rs2382987  | -1702T>C     |
|            |       | JAK3-23  | rs11888    | *1925G>A     |
|            |       | JAK3-15  | rs2072496  | IVS14-30C>T  |
|            |       | JAK3-12  | rs3212752  | IVS12+9A>G   |
|            |       | JAK3-19  | rs3212741  | IVS8-28C>T   |
|            |       | JAK3-21  | rs867174   | IVS6+195T>C  |
|            |       | JAK3-02  | rs3212711  | IVS2+22C>T   |
|            |       | JAK3-18  | rs3212701  | IVS1+1731G>A |
|            |       | JAK3-16  | rs2110586  | IVS1+1446A>G |
|            |       | JAK3-20  | rs7250423  | IVS1+138G>A  |
|            |       | JAK3-26  | rs7245564  | -8651C>A     |
|            |       | JAK3-22  | rs10402563 | -9728T>G     |
| KLK1/KLK15 | KLK1  | KLK1-03  | rs197589   | *4314C>G     |
|            |       | KLK1-04  | rs3212846  | *1192A>G     |
|            |       | KLK1-06  | rs5519     | *137A>G      |
|            |       | KLK1-01  | rs2659058  | IVS1+853G>A  |
|            |       | KLK1-02  | rs2740502  | IVS1+773C>G  |
|            |       | KLK1-05  | rs3212855  | -764A>C      |
|            | KLK15 | KLK15-01 | rs2560935  | IVS1+351A>G  |
|            |       | KLK15-06 | rs3745523  | -141G>A      |
|            |       | KLK15-03 | rs2659056  | -1194A>G     |
|            |       | KLK15-04 | rs266850   | -1448T>C     |
|            |       | KLK15-05 | rs266851   | -1590G>A     |
| KLK2       | KLK2  | KLK2-04  | rs2739476  | -2911A>G     |
|            |       | KLK2-06  | rs3760728  | -2137G>C     |
|            |       | KLK2-01  | rs198977   | Ex5+118C>T   |
| KLK4       | KLK4  | KLK4-13  | rs806019   | *4207C>G     |
|            |       | KLK4-05  | rs1654553  | IVS4+499A>G  |
|            |       | KLK4-02  | rs2979451  | IVS4+227A>G  |
|            |       | KLK4-01  | rs198968   | IVS1+606T>C  |
|            |       | KLK4-09  | rs2664152  | -1155C>A     |
|            |       | KLK4-10  | rs2664153  | -1257T>C     |
|            |       | KLK4-06  | rs1701930  | -5551T>C     |
|            |       | KLK4-08  | rs2659079  | -7496T>C     |
|            |       | KLK4-03  | rs10420003 | -7984G>A     |
|            |       | KLK4-11  | rs268922   | -8621G>T     |
|            |       | KLK4-04  | rs10427094 | -8882G>A     |
|            |       | KLK4-14  | rs8100631  | -9551G>A     |
| KLK6/KLK7  | KLK6  | KLK6-03  | rs4592765  | *2388G>A     |
|            |       | KLK6-01  | rs1654537  | IVS5+42T>C   |
|            | KLK7  | KLK7-02  | rs1701958  | *4076C>G     |
|            |       | KLK7-01  | rs1618440  | *3263G>A     |
| KLKB1      | KLKB1 | KLKB1-13 | rs4253236  | -1278C>T     |

|        |        |           |            |               |
|--------|--------|-----------|------------|---------------|
|        |        | KLKB1-10  | rs4253246  | IVS3-682A>T   |
|        |        | KLKB1-01  | rs2304595  | IVS7-93G>A    |
|        |        | KLKB1-05  | rs4253302  | IVS11+149A>G  |
|        |        | KLKB1-11  | rs4253311  | IVS11-1059A>G |
|        |        | KLKB1-06  | rs4253315  | IVS11-285C>T  |
|        |        | KLKB1-03  | rs3775302  | IVS13-566A>G  |
|        |        | KLKB1-14  | rs925453   | Ex15+36T>C    |
|        |        | KLKB1-02  | rs3087505  | Ex15-139A>G   |
|        |        | KLKB1-09  | rs3822055  | *311C>T       |
|        |        | KLKB1-12  | rs6844764  | *2166C>G      |
|        |        | KLKB1-08  | rs13135645 | *2496C>T      |
|        |        | KLKB1-07  | rs11132383 | *3293C>T      |
| LMAN1  | LMAN1  | LMAN1-09  | rs2298711  | Ex11+8A>T     |
|        |        | LMAN1-04  | rs4940866  | IVS10+1057T>C |
|        |        | LMAN1-02  | rs12953981 | IVS8-3271G>A  |
|        |        | LMAN1-01  | rs1127220  | Ex2-19A>G     |
|        |        | LMAN1-07  | rs2282582  | -2684T>A      |
|        |        | LMAN1-08  | rs2282583  | -3229G>A      |
|        |        | LMAN1-06  | rs1899894  | -6176A>G      |
|        |        | LMAN1-05  | rs11876937 | -6323T>C      |
| LTBR   | LTBR   | LTBR-03   | rs3759333  | -1577C>T      |
|        |        | LTBR-04   | rs4301834  | *739A>G       |
|        |        | LTBR-01   | rs11064160 | *2604C>T      |
|        |        | LTBR-02   | rs12296430 | *3396C>G      |
|        | SCNN1A | SCNN1A-01 | rs3759324  | -1711G>A      |
| LY6G6D | BAT5   | BAT5-02   | rs2295663  | IVS2-178T>C   |
|        |        | BAT5-01   | rs1266071  | IVS2+355G>A   |
|        | LY6G6D | LY6G6D-02 | rs805287   | -4402G>A      |
| LY96   | LY96   | LY96-06   | rs1905045  | -3663C>T      |
|        |        | LY96-03   | rs16938755 | IVS1+347T>C   |
|        |        | LY96-02   | rs11786591 | IVS1-687C>T   |
|        |        | LY96-07   | rs1991262  | IVS2+2209G>C  |
|        |        | LY96-01   | rs10504554 | IVS2-2523T>C  |
|        |        | LY96-05   | rs7838017  | IVS3-3325C>T  |
| MAL    | MAL    | MAL-06    | rs6747563  | -8417A>G      |
|        |        | MAL-05    | rs2279785  | -1279G>C      |
|        |        | MAL-04    | rs7560571  | IVS1+1144G>A  |
|        |        | MAL-01    | rs1316873  | IVS1+7016C>G  |
|        |        | MAL-03    | rs3113002  | IVS1+9100G>A  |
|        |        | MAL-02    | rs3112982  | IVS3+416T>C   |
| MASP1  | MASP1  | MASP1-169 | rs1848450  | *5986A>G      |
|        |        | MASP1-173 | rs720511   | *5817T>C      |
|        |        | MASP1-168 | rs16861729 | *2532A>G      |
|        |        | MASP1-99  | rs3821801  | Ex18+829A>G   |
|        |        | MASP1-60  | rs17040    | Ex18+482T>C   |
|        |        | MASP1-21  | rs3733001  | IVS16-34G>A   |
|        |        | MASP1-155 | rs3914010  | IVS16-651T>C  |
|        |        | MASP1-166 | rs9880761  | IVS15-315C>T  |
|        |        | MASP1-148 | rs11720718 | IVS15-447C>T  |
|        |        | MASP1-42  | rs1001073  | IVS13-397T>C  |

|       |       |           |            |               |
|-------|-------|-----------|------------|---------------|
|       |       | MASP1-142 | rs16861755 | IVS13+320T>C  |
|       |       | MASP1-163 | rs850316   | IVS12-467C>T  |
|       |       | MASP1-154 | rs3864097  | IVS12+1237C>T |
|       |       | MASP1-164 | rs876650   | IVS12+232C>G  |
|       |       | MASP1-69  | rs12489890 | Ex12-544C>T   |
|       |       | MASP1-40  | rs874603   | Ex12-1166C>T  |
|       |       | MASP1-121 | rs850312   | Ex12+548G>A   |
|       |       | MASP1-48  | rs696405   | IVS11-1868A>C |
|       |       | MASP1-24  | rs3815623  | IVS11+227C>T  |
|       |       | MASP1-53  | rs710459   | IVS10+790C>T  |
|       |       | MASP1-162 | rs710462   | IVS9+1476C>A  |
|       |       | MASP1-50  | rs698090   | IVS9+306G>A   |
|       |       | MASP1-31  | rs698092   | IVS6-94T>C    |
|       |       | MASP1-32  | rs698094   | IVS6+148T>C   |
|       |       | MASP1-45  | rs3105782  | IVS5-193T>C   |
|       |       | MASP1-156 | rs4686864  | IVS4+1538C>T  |
|       |       | MASP1-167 | rs1357134  | IVS3+563T>C   |
|       |       | MASP1-64  | rs850307   | IVS2-960C>A   |
|       |       | MASP1-57  | rs710469   | IVS2-4010C>T  |
|       |       | MASP1-160 | rs698102   | IVS2+10332G>A |
|       |       | MASP1-165 | rs879537   | IVS2+7518T>A  |
|       |       | MASP1-152 | rs3107217  | IVS2+6794A>T  |
|       |       | MASP1-159 | rs698085   | IVS2+6190C>T  |
|       |       | MASP1-158 | rs698084   | IVS2+5965G>A  |
|       |       | MASP1-08  | rs13064994 | IVS1-2172C>T  |
|       |       | MASP1-172 | rs710474   | -2640C>T      |
|       |       | MASP1-170 | rs3107215  | -7947C>G      |
|       |       | MASP1-171 | rs4686870  | -8420G>A      |
| MASP2 | MASP2 | MASP2-05  | rs12711521 | Ex10+24G>T    |
|       |       | MASP2-15  | rs6695096  | IVS8-76G>A    |
|       |       | MASP2-17  | rs7548659  | -174C>A       |
| MBL2  | MBL2  | MBL2-89   | rs12771266 | *6720T>C      |
|       |       | MBL2-83   | rs2506     | Ex4-370T>G    |
|       |       | MBL2-08   | rs930507   | Ex4+5C>G      |
|       |       | MBL2-06   | rs1838066  | IVS2-250T>C   |
|       |       | MBL2-04   | rs1982266  | IVS1-90T>C    |
|       |       | MBL2-40   | rs920724   | -1401T>C      |
|       |       | MBL2-86   | rs11003132 | -6051G>A      |
|       |       | MBL2-87   | rs11003134 | -6763T>G      |
|       |       | MBL2-84   | rs10824800 | -6914T>G      |
|       |       | MBL2-88   | rs11003137 | -8501T>C      |
|       |       | MBL2-85   | rs10824801 | -9670T>A      |
| MBP   | MBP   | MBP-33    | rs1789256  | *5331G>A      |
|       |       | MBP-31    | rs17026    | Ex11-191A>G   |
|       |       | MBP-19    | rs470821   | IVS10-791A>G  |
|       |       | MBP-07    | rs2279078  | IVS10+550A>G  |
|       |       | MBP-21    | rs470934   | IVS8-792C>A   |
|       |       | MBP-26    | rs8086634  | IVS6-324G>A   |
|       |       | MBP-30    | rs9676140  | IVS5-983G>C   |
|       |       | MBP-02    | rs11661054 | IVS5-2259G>T  |



|      |      |            |            |              |
|------|------|------------|------------|--------------|
|      |      | MBP-22     | rs4890785  | IVS5-2957A>G |
|      |      | MBP-29     | rs9675994  | IVS5-4443G>A |
|      |      | MBP-27     | rs8090438  | IVS5-5096T>A |
|      |      | MBP-28     | rs8094402  | IVS5-5433T>C |
|      |      | MBP-04     | rs17576751 | IVS5-7027G>A |
|      |      | MBP-24     | rs4890875  | IVS5-8043T>C |
|      |      | MBP-16     | rs470498   | IVS5-9705G>C |
|      |      | MBP-09     | rs2974260  | IVS5+9361C>A |
|      |      | MBP-12     | rs3794845  | IVS5+7288C>G |
|      |      | MBP-20     | rs470895   | IVS5+6284T>C |
|      |      | MBP-01     | rs10514234 | IVS5+6056A>G |
|      |      | MBP-11     | rs3794842  | IVS5+4688G>A |
|      |      | MBP-17     | rs470681   | IVS5+3868G>A |
|      |      | MBP-10     | rs3794834  | IVS5+1708G>C |
|      |      | MBP-05     | rs17576996 | IVS4-685T>G  |
|      |      | MBP-14     | rs470261   | IVS4-898T>C  |
|      |      | MBP-23     | rs4890788  | IVS4+482G>A  |
|      |      | MBP-08     | rs2282557  | Ex4-428G>A   |
|      |      | MBP-25     | rs7232502  | Ex4+1607G>A  |
|      |      | MBP-36     | rs921336   | IVS3-3248C>A |
|      |      | MBP-32     | rs17660901 | IVS3-4794G>C |
|      |      | MBP-34     | rs2282574  | IVS3-9081T>C |
| MCP  | MCP  | MCP-08     | rs2761435  | -7091C>G     |
|      |      | MCP-05     | rs4844390  | IVS5+58A>G   |
|      |      | MCP-01     | rs17006738 | IVS5+1312G>A |
|      |      | MCP-06     | rs6671947  | IVS5+1700C>G |
|      |      | MCP-04     | rs2796278  | IVS9-814A>C  |
|      |      | MCP-02     | rs1962149  | IVS9-78G>A   |
|      |      | MCP-07     | rs7541230  | IVS10-861T>C |
| MEFV | MEFV | MEFV-04    | rs186493   | *3809C>A     |
|      |      | MEFV-05    | rs224234   | *1170G>T     |
|      |      | MEFV-01    | rs224205   | IVS5-69G>A   |
|      |      | MEFV-02    | rs224215   | IVS2-1580T>C |
|      |      | MEFV-03    | rs224225   | Ex2+29T>C    |
| MIF  | MIF  | SLC2A11-01 | rs1984309  | *3778A>G     |
|      |      | MIF-15     | rs12628766 | -2747G>T     |
|      |      | MIF-22     | rs875643   | -2663G>A     |
|      |      | MIF-20     | rs738806   | -2489A>G     |
|      |      | MIF-21     | rs738807   | -2416C>T     |
|      |      | MIF-18     | rs2000466  | *568G>T      |
|      |      | MIF-16     | rs17004044 | *2601C>T     |
|      |      | MIF-19     | rs5760093  | *3046A>G     |
|      |      | MIF-17     | rs17004047 | *3625A>G     |
|      |      | MIF-14     | rs1007888  | *3807T>C     |
|      |      | MIF-23     | rs2000467  | *4239A>G     |
| MPO  | MPO  | LPO-11     | rs8178407  | IVS11-54A>G  |
|      |      | MPO-04     | rs2071409  | IVS11-6A>C   |
|      |      | MPO-03     | rs2243828  | -764T>C      |
|      |      | MPO-18     | rs4401102  | -2717G>A     |
|      |      | MPO-17     | rs12452417 | -9082T>C     |

|          |            |             |            |               |            |              |
|----------|------------|-------------|------------|---------------|------------|--------------|
| MUC6     | MUC6       | MUC6-13     | rs10902076 | -29331G>C     |            |              |
|          |            | MUC6-05     | rs11245935 | -47233G>A     |            |              |
|          |            | MUC6-06     | rs11245936 | -47649T>C     |            |              |
|          |            | MUC6-03     | rs7934606  | -57232A>G     |            |              |
|          |            | MUC6-04     | rs10902089 | -57644T>C     |            |              |
|          |            | MUC6-01     | rs10794293 | -62226G>A     |            |              |
|          |            | MUC6-08     | rs7480563  | -64936A>G     |            |              |
|          |            | MUC6-07     | rs7126405  | -66583A>G     |            |              |
|          |            | MUC6-09     | rs4077757  | -69121T>A     |            |              |
|          |            | MUC6-10     | rs4077759  | -69263G>A     |            |              |
|          |            | MUC6-14     | rs7952385  | -72336A>G     |            |              |
|          |            | MUC7        | MUC7       | MUC7-07       | rs13149271 | -3007A>G     |
|          |            |             |            | MUC7-08       | rs4629524  | -2691A>G     |
|          |            |             |            | MUC7-02       | rs2306950  | IVS1-286A>T  |
| MUC7-01  | rs10003641 |             |            | IVS2+635T>C   |            |              |
| MUC7-05  | rs6826961  |             |            | Ex3+186C>G    |            |              |
| MUC7-03  | rs3733492  |             |            | Ex3-1021T>C   |            |              |
| MUC7-09  | rs6600832  |             |            | *5912C>T      |            |              |
| MYD88    | ACAA1      |             |            | ACAA1-01      | rs2239621  | IVS3-237G>A  |
|          | MYD88      |             |            | MYD88-01      | rs7744     | Ex5-493A>G   |
|          |            | MYD88-02    | rs9881120  | *3639A>T      |            |              |
| NCF2     | NCF2       | NCF2-30     | rs3843293  | IVS6+466C>A   |            |              |
|          |            | NCF2-29     | rs12753665 | IVS3+673C>T   |            |              |
|          |            | NCF2-27     | rs10797888 | IVS2-190A>G   |            |              |
|          |            | NCF2-31     | rs3845466  | IVS2+4270C>T  |            |              |
|          |            | NCF2-28     | rs11588654 | IVS1-283A>G   |            |              |
|          |            | NCF2-34     | rs11579965 | -3696G>C      |            |              |
|          |            | NCF2-35     | rs2333686  | -6635G>A      |            |              |
| NCF4     | FLJ90680   | FLJ90680-01 | rs760521   | -3670G>C      |            |              |
|          |            | NCF4-44     | rs5756372  | -7722C>G      |            |              |
|          |            | NCF4-49     | rs9680849  | -6756A>T      |            |              |
|          |            | NCF4-39     | rs10854693 | -5203A>G      |            |              |
|          |            | NCF4-41     | rs1883113  | -4529C>G      |            |              |
|          |            | NCF4-42     | rs4821542  | -4295C>T      |            |              |
|          |            | NCF4-35     | rs4821544  | IVS1+1258T>C  |            |              |
|          |            | NCF4-36     | rs741998   | IVS1-1243G>A  |            |              |
|          |            | NCF4-37     | rs746713   | IVS1-728T>C   |            |              |
|          |            | NCF4-38     | rs760519   | IVS4+202C>T   |            |              |
|          |            | NCF4-18     | rs729749   | IVS4+342T>C   |            |              |
|          |            | NCF4-34     | rs2075938  | IVS4-135A>G   |            |              |
|          |            | NCF4-33     | rs2072711  | IVS7+88A>G    |            |              |
|          |            | NCF4-12     | rs3788523  | IVS7+1040T>C  |            |              |
|          |            | NCF4-47     | rs6000462  | *481A>G       |            |              |
|          |            | NCF4-43     | rs5750326  | *2419A>C      |            |              |
|          |            | NCF4-45     | rs5756381  | *3750A>G      |            |              |
|          |            | NFKB1       | NFKB1      | NFKB1-40      | rs3774934  | IVS1+4529A>G |
|          |            |             |            | NFKB1-36      | rs1585213  | IVS1-1971C>T |
| NFKB1-41 | rs4647992  |             |            | IVS4+305C>T   |            |              |
| NFKB1-42 | rs4648006  |             |            | IVS5+2447C>T  |            |              |
| NFKB1-37 | rs230510   |             |            | IVS5-11979A>T |            |              |

|       |       |          |            |                |
|-------|-------|----------|------------|----------------|
|       |       | NFKB1-35 | rs13117745 | IVS5-9442C>T   |
|       |       | NFKB1-43 | rs4648022  | IVS6-1596C>T   |
|       |       | NFKB1-38 | rs230540   | IVS6-1366T>C   |
|       |       | NFKB1-39 | rs3755867  | IVS16-979A>G   |
|       |       | NFKB1-44 | rs4648090  | IVS16-585G>A   |
|       |       | NFKB1-45 | rs4648110  | IVS22+58T>A    |
|       |       | NFKB1-46 | rs4648127  | IVS23+1167C>T  |
|       |       | NFKB1-14 | rs230547   | IVS23-1330T>C  |
|       |       | NFKB1-47 | rs7674640  | *3030C>T       |
| NOS1  | NOS1  | NOS1-23  | rs816361   | IVS28+720G>C   |
|       |       | NOS1-26  | rs9658490  | IVS21-362G>C   |
|       |       | NOS1-06  | rs1353939  | IVS20-2790G>A  |
|       |       | NOS1-01  | rs10850803 | IVS18-589T>C   |
|       |       | NOS1-08  | rs2291908  | IVS18+15A>G    |
|       |       | NOS1-21  | rs816351   | IVS17-2172T>C  |
|       |       | NOS1-09  | rs2293054  | Ex13-21T>C     |
|       |       | NOS1-10  | rs2293055  | IVS12-105C>T   |
|       |       | NOS1-17  | rs6490121  | IVS10+1995C>T  |
|       |       | NOS1-24  | rs884847   | IVS6+296T>C    |
|       |       | NOS1-25  | rs9658354  | IVS5-154T>A    |
|       |       | NOS1-15  | rs532967   | IVS3-4108T>C   |
|       |       | NOS1-04  | rs11611788 | IVS3-10145A>G  |
|       |       | NOS1-19  | rs7298903  | IVS3+2061A>G   |
|       |       | NOS1-18  | rs7295972  | IVS3+1903T>C   |
|       |       | NOS1-02  | rs11068446 | IVS3+1657G>A   |
|       |       | NOS1-20  | rs816293   | IVS2+5451G>C   |
|       |       | NOS1-05  | rs12578547 | IVS2+4803A>G   |
|       |       | NOS1-32  | rs9658282  | IVS2+686T>A    |
|       |       | NOS1-12  | rs3782218  | IVS1-2217G>A   |
|       |       | NOS1-16  | rs545654   | IVS1-7755G>A   |
|       |       | NOS1-28  | rs12424669 | IVS1-9662G>A   |
|       |       | NOS1-07  | rs1552227  | IVS1-9741G>A   |
|       |       | NOS1-14  | rs483589   | IVS1-12237C>T  |
|       |       | NOS1-03  | rs1123425  | IVS1+13212T>C  |
|       |       | NOS1-13  | rs3782221  | IVS1+3436C>T   |
|       |       | NOS1-27  | rs11068458 | -33867T>C      |
|       |       | NOS1-29  | rs1879417  | -34640G>A      |
|       |       | NOS1-30  | rs4767535  | -36000G>A      |
| NOS2A | NOS2A | NOS2A-29 | rs9901734  | *3242G>C       |
|       |       | NOS2A-28 | rs8081248  | *2307C>T       |
|       |       | NOS2A-11 | rs2255929  | IVS23-197A>T   |
|       |       | NOS2A-12 | rs2297516  | IVS17+273T>G   |
|       |       | NOS2A-19 | rs9797244  | IVS15-521A>G   |
|       |       | NOS2A-22 | rs2248814  | IVS12-52T>C    |
|       |       | NOS2A-09 | rs12944039 | IVS11+952C>->T |
|       |       | NOS2A-16 | rs4795067  | IVS9-593T>C    |
|       |       | NOS2A-13 | rs3729508  | IVS7+11A>G     |
|       |       | NOS2A-18 | rs944725   | IVS6+399G>A    |
|       |       | NOS2A-14 | rs3794763  | IVS5-1094C>T   |
|       |       | NOS2A-17 | rs8072199  | IVS2-134G>A    |

|         |         |            |            |               |
|---------|---------|------------|------------|---------------|
|         |         | NOS2A-25   | rs2779248  | -1996G>A      |
|         |         | NOS2A-20   | rs11080358 | -4760T>C      |
|         |         | NOS2A-26   | rs2779252  | -5534C>A      |
|         |         | NOS2A-21   | rs12150211 | -8596T>C      |
|         |         | NOS2A-23   | rs2531863  | -11714T>C     |
| NOS3    | ATG9B   | ATG9B-01   | rs2373929  | IVS8+146C>T   |
|         | NOS3    | NOS3-41    | rs4496877  | -10385G>T     |
|         |         | NOS3-40    | rs2373961  | -9681T>C      |
|         |         | NOS3-39    | rs12703107 | -7262G>T      |
|         |         | NOS3-01    | rs1799983  | Ex8-63T>G     |
|         |         | NOS3-38    | rs3918227  | IVS14+1554C>A |
|         |         | NOS3-23    | rs743507   | IVS21+113C>T  |
| PFKFB2  | PFKFB2  | PFKFB2-02  | rs17258746 | Ex16+349T>A   |
|         |         | PFKFB2-03  | rs3748671  | Ex16+733C>T   |
|         |         | PFKFB2-04  | rs6673422  | Ex16-882A>G   |
| PTGDR   | PTGDR   | PTGDR-08   | rs803022   | -8898A>T      |
|         |         | PTGDR-06   | rs2040049  | -8444T>A      |
|         |         | PTGDR-07   | rs803014   | -4402G>A      |
|         |         | PTGDR-04   | rs4898758  | IVS1+1390A>G  |
|         |         | PTGDR-02   | rs1254609  | IVS1-2981A>G  |
|         |         | PTGDR-01   | rs10498445 | IVS1-1008C>G  |
|         |         | PTGDR-05   | rs708486   | IVS1-478A>G   |
| RAC1    | RAC1    | RAC1-07    | rs6967221  | IVS3-464G>A   |
|         |         | RAC1-08    | rs702484   | IVS4+261C>G   |
|         |         | RAC1-06    | rs6463554  | IVS4-492G>C   |
|         |         | RAC1-10    | rs836551   | IVS7+141G>C   |
|         |         | RAC1-09    | rs4720672  | *1761C>T      |
|         |         | RAC1-11    | rs836554   | *3157C>T      |
| RAC2    | RAC2    | RAC2-09    | rs4821609  | *4634T>C      |
|         |         | RAC2-05    | rs6572     | Ex7-136G>C    |
|         |         | RAC2-19    | rs8135343  | IVS4+127C>T   |
|         |         | RAC2-20    | rs9607432  | IVS2-1525A>G  |
|         |         | RAC2-01    | rs1476002  | IVS2-1830A>G  |
|         |         | RAC2-16    | rs2239774  | Ex2-27C>G     |
|         |         | RAC2-17    | rs2239775  | IVS1-143G>T   |
|         |         | RAC2-15    | rs2239773  | IVS1-591C>T   |
|         |         | RAC2-14    | rs2213430  | IVS1+1194A>G  |
|         |         | RAC2-24    | rs739043   | -5041T>C      |
|         |         | RAC2-21    | rs12484031 | -9081T>C      |
| SCGB1A1 | SCGB1A1 | SCGB1A1-05 | rs3889277  | -7746G>C      |
|         |         | SCGB1A1-04 | rs2509973  | -7196C>A      |
|         |         | SCGB1A1-02 | rs10897270 | -3560C>T      |
|         |         | SCGB1A1-01 | rs3741240  | Ex1+20G>A     |
|         |         | SCGB1A1-03 | rs2509963  | *2367T>C      |
| SELE    | SELE    | SELE-38    | rs4656699  | *7325G>A      |
|         |         | SELE-39    | rs4656701  | *6981G>C      |
|         |         | SELE-31    | rs1076637  | IVS7-57G>A    |
|         |         | SELE-32    | rs2076059  | IVS5-107G>A   |
|         |         | SELE-37    | rs3917412  | IVS4+474A>G   |
|         |         | SELE-02    | rs3917410  | IVS3-25T>C    |

|          |          |             |            |               |
|----------|----------|-------------|------------|---------------|
|          |          | SELE-35     | rs12084893 | -5632T>C      |
|          |          | SELE-18     | rs6427213  | -10392T>C     |
| SELP     | F5       | F5-04       | rs3753305  | IVS1+1409G>C  |
|          | SELP     | SELP-18     | rs3917854  | IVS16-336G>A  |
|          |          | SELP-20     | rs6128     | Ex14+59G>A    |
|          |          | SELP-15     | rs3917818  | IVS12+245C>T  |
|          |          | SELP-05     | rs3766122  | IVS10-413A>G  |
|          |          | SELP-14     | rs3917802  | IVS10-670A>G  |
|          |          | SELP-29     | rs760694   | IVS10-2284A>C |
|          |          | SELP-04     | rs2420378  | IVS10+2346T>A |
|          |          | SELP-13     | rs3917744  | IVS8+752T>C   |
|          |          | SELP-01     | rs2076074  | IVS8+156C>T   |
|          |          | SELP-12     | rs3917740  | IVS7-339C>T   |
|          |          | SELP-11     | rs3917739  | IVS7-451G>A   |
|          |          | SELP-27     | rs6131     | Ex7+31G>A     |
|          |          | SELP-09     | rs3917709  | IVS3-1614C>T  |
|          |          | SELP-08     | rs3917688  | IVS1-2623G>A  |
|          |          | SELP-07     | rs3917683  | IVS1-2916A>G  |
|          |          | SELP-06     | rs3917681  | IVS1-3246T>C  |
|          |          | SELP-25     | rs3753306  | -919G>A       |
|          |          | SELP-23     | rs17523783 | -2928C>A      |
|          |          | SELP-28     | rs6691334  | -3070T>C      |
|          |          | SELP-22     | rs12401978 | -5472T>A      |
| SELPLG   | CORO1C   | CORO1C-01   | rs1558802  | *4930T>A      |
|          | SELPLG   | SELPLG-03   | rs9668031  | *2529G>A      |
|          |          | SELPLG-01   | rs2228315  | Ex2+191G>A    |
|          |          | SELPLG-02   | rs3782522  | IVS1+2791G>A  |
| SENP3    | SENP3    | SENP3-02    | rs4968212  | IVS3+35T>C    |
|          |          | SENP3-01    | rs10438740 | IVS7-790G>A   |
| SERPINB2 | SERPINB2 | SERPINB2-02 | rs9320031  | IVS2+1805C>A  |
|          |          | SERPINB2-01 | rs6105     | Ex5-17C>G     |
|          |          | SERPINB2-03 | rs1916661  | *4580G>T      |
| SERPINB3 | SERPINB3 | SERPINB3-06 | rs4941210  | *847G>A       |
|          |          | SERPINB3-01 | rs1065205  | Ex8+301A>G    |
|          |          | SERPINB3-05 | rs3867263  | -3159A>G      |
|          |          | SERPINB3-02 | rs12327459 | -5306G>A      |
|          |          | SERPINB3-03 | rs12960185 | -7917T>C      |
| SERPINC1 | SERPINC1 | SERPINC1-05 | rs6691053  | *4071A>G      |
|          |          | SERPINC1-04 | rs2295957  | *3383A>G      |
|          |          | SERPINC1-02 | rs941989   | IVS2-719G>A   |
|          |          | SERPINC1-01 | rs2227589  | IVS1+141G>A   |
|          |          | SERPINC1-03 | rs1951626  | -5703C>T      |
|          |          | SERPINC1-06 | rs7528380  | -9755T>C      |
| SERPINE1 | SERPINE1 | SERPINE1-08 | rs6950982  | -5071A>G      |
|          |          | SERPINE1-07 | rs2227631  | -2136A>G      |
|          |          | SERPINE1-03 | rs2227667  | IVS3-407A>G   |
|          |          | SERPINE1-04 | rs2227672  | IVS4+336G>T   |
|          |          | SERPINE1-02 | rs2070682  | IVS5+93T>C    |
|          |          | SERPINE1-05 | rs2227692  | IVS7+162C>T   |
|          |          | SERPINE1-01 | rs1050813  | Ex9-692G>A    |

|             |              |              |            |               |
|-------------|--------------|--------------|------------|---------------|
| SERPING1    | LOC390183    | LOC390183-03 | rs2649663  | NC_-12807T>C  |
|             |              | LOC390183-02 | rs3758919  | NC_-18305C>T  |
| SERPING1    | SERPING1     | SERPING1-01  | rs1005510  | IVS2-130C>T   |
|             |              | SERPING1-02  | rs11603020 | IVS6+312T>C   |
| SERPINI1    | SERPINI1     | SERPINI1-02  | rs11921535 | IVS1+6460G>A  |
|             |              | SERPINI1-16  | rs9883327  | IVS1+24404G>A |
|             |              | SERPINI1-14  | rs9856551  | IVS1-26235A>G |
|             |              | SERPINI1-15  | rs9859639  | IVS1-20593A>T |
|             |              | SERPINI1-03  | rs13090836 | IVS2-98T>C    |
|             |              | SERPINI1-06  | rs16851469 | IVS5+344A>C   |
|             |              | SERPINI1-18  | rs9858935  | IVS5-3691G>A  |
|             |              | SERPINI1-04  | rs13093535 | IVS6+1300T>C  |
|             |              | SERPINI1-09  | rs3804617  | IVS6+2242T>C  |
|             |              | SERPINI1-01  | rs10513634 | IVS6+2657T>A  |
|             |              | SERPINI1-07  | rs16851498 | IVS6+5087A>G  |
|             |              | SERPINI1-08  | rs3792297  | IVS6+5461G>C  |
|             |              | SERPINI1-05  | rs1552746  | IVS6+5891C>T  |
|             |              | SERPINI1-12  | rs7641394  | IVS6+6478T>C  |
|             |              | SERPINI1-10  | rs6785838  | IVS6+7771C>G  |
|             |              | SERPINI1-13  | rs7651327  | IVS6-5781T>C  |
|             |              | SERPINI1-11  | rs720958   | IVS6-213A>G   |
| SERPINI1-17 | rs3792298    | IVS7-279C>A  |            |               |
| SOCS1       | SOCS1        | SOCS1-10     | rs149597   | *4757G>C      |
|             |              | SOCS1-11     | rs243317   | -7995T>G      |
| SOCS2       | SOCS2        | SOCS2-04     | rs7969157  | -9570G>T      |
|             |              | SOCS2-02     | rs3782415  | IVS2-743T>C   |
|             |              | SOCS2-03     | rs3816997  | *1830C>A      |
| SOCS3       | SOCS3        | SOCS2-01     | rs10745657 | *4545A>G      |
|             |              | SOCS3-02     | rs8069976  | *4648G>T      |
|             |              | SOCS3-01     | rs4969168  | Ex2-935T>C    |
|             |              | SOCS3-03     | rs4969170  | -5361T>C      |
| SOCS4       | SOCS4        | SOCS3-04     | rs8074003  | -9316G>A      |
|             |              | SOCS4-03     | rs1952438  | IVS1-633G>A   |
|             |              | SOCS4-01     | rs11851178 | IVS2+3423A>G  |
|             |              | WDHD1-01     | rs1209087  | IVS2+209G>A   |
| SOD1        | SOD1         | SOD1-08      | rs202445   | -6415T>C      |
|             |              | SOD1-03      | rs10432782 | IVS2+192T>G   |
|             |              | SOD1-16      | rs1041740  | IVS4+474C>T   |
|             |              | SFRS15-02    | rs2833475  | IVS19-153T>C  |
| SOD2        | SOD2         | SOD2-20      | rs5746136  | Ex5-330G>A    |
|             |              | SOD2-29      | rs2758331  | IVS4+816G>T   |
|             |              | SOD2-16      | rs2758352  | -8721T>C      |
| SOD3        | SOD3         | SOD3-27      | rs2284659  | -6346T>G      |
|             |              | SOD3-28      | rs758946   | *5420C>T      |
| STAT1/STAT4 | GLS<br>STAT1 | GLS-01       | rs13035504 | Ex18-920C>G   |
|             |              | STAT1-21     | rs1400657  | *1888A>C      |
|             |              | STAT1-19     | rs4853533  | IVS24-1328A>G |
|             |              | STAT1-15     | rs13395505 | IVS24+1042C>T |
|             |              | STAT1-01     | rs2066804  | IVS21-8C>T    |
|             |              | STAT1-20     | rs7562024  | IVS11+433A>G  |

|              |        |           |            |               |
|--------------|--------|-----------|------------|---------------|
|              |        | STAT1-11  | rs12693591 | IVS9-557G>T   |
|              |        | STAT1-10  | rs10173099 | IVS5-1443G>A  |
|              |        | STAT1-22  | rs1467199  | -5772G>C      |
|              |        | STAT1-23  | rs6751855  | -10041T>C     |
|              | STAT4  | STAT4-41  | rs16833177 | *6933G>A      |
|              |        | STAT4-46  | rs7558921  | *6341G>C      |
|              |        | STAT4-45  | rs6740131  | *4983T>C      |
|              |        | STAT4-43  | rs3024912  | *1478T>G      |
|              |        | STAT4-24  | rs3024896  | IVS21-474G>A  |
|              |        | STAT4-36  | rs925847   | IVS21+144G>A  |
|              |        | STAT4-17  | rs16833215 | IVS14+5417T>C |
|              |        | STAT4-29  | rs4853540  | IVS14+1899A>C |
|              |        | STAT4-23  | rs3024861  | IVS10-1111A>T |
|              |        | STAT4-22  | rs3024851  | IVS8+711T>A   |
|              |        | STAT4-08  | rs10168266 | IVS5-1307G>A  |
|              |        | STAT4-44  | rs6434435  | IVS3-12813C>T |
|              |        | STAT4-12  | rs11693480 | IVS3-16644G>T |
|              |        | STAT4-33  | rs7574865  | IVS3-23582A>C |
|              |        | STAT4-19  | rs16833260 | IVS3-30514C>G |
|              |        | STAT4-31  | rs6752770  | IVS3-32512T>C |
|              |        | STAT4-16  | rs1551443  | IVS3+14821A>G |
|              |        | STAT4-09  | rs10189819 | IVS3+2590A>G  |
|              |        | STAT4-11  | rs11685878 | IVS3+1884A>G  |
|              |        | STAT4-10  | rs1031509  | IVS3+1150A>C  |
|              |        | STAT4-13  | rs12327969 | IVS3+568C>G   |
|              |        | STAT4-42  | rs16833437 | -6442C>A      |
|              |        | STAT4-38  | rs1031507  | -7688G>T      |
|              |        | STAT4-40  | rs13022931 | -7799T>C      |
| STAT2        | STAT2  | STAT2-02  | rs2066808  | IVS22-54T>C   |
| STAT3/STAT5A | STAT5A | STAT5A-02 | rs16967637 | IVS5-1215C>A  |
|              |        | STAT5A-01 | rs12601982 | IVS19+172A>G  |
|              | STAT3  | STAT3-04  | rs2293152  | IVS13+43C>G   |
|              |        | STAT3-06  | rs7217655  | IVS4+1553G>A  |
|              |        | STAT3-05  | rs6503695  | IVS2-802A>G   |
|              |        | STAT3-01  | rs17593222 | IVS1-12433G>C |
|              |        | STAT3-02  | rs3785898  | IVS1-14563G>T |
|              |        | STAT3-03  | rs12949918 | IVS1+14024A>G |
| STAT5B       | STAT5B | STAT5B-04 | rs9900213  | IVS4-307C>A   |
|              |        | STAT5B-03 | rs6503691  | IVS1-9935G>A  |
| STAT6        | NAB2   | NAB2-03   | rs324020   | IVS2-198A>C   |
|              | STAT6  | STAT6-05  | rs703817   | Ex22-638G>A   |
|              |        | STAT6-03  | rs324015   | Ex22+445A>G   |
|              |        | STAT6-15  | rs3024974  | IVS17+53C>T   |
|              |        | STAT6-14  | rs3024971  | IVS14-41A>C   |
|              |        | STAT6-01  | rs167769   | IVS1+1137G>A  |
|              |        | STAT6-16  | rs324013   | -8599G>A      |
|              |        | STAT6-19  | rs11172106 | -10813G>C     |
| TICAM1       | TICAM1 | TICAM1-05 | rs11667699 | *4596T>C      |
|              |        | TICAM1-03 | rs11085101 | *4294T>C      |
|              |        | TICAM1-02 | rs1107009  | *2564C>G      |

|                     |                     |             |            |               |
|---------------------|---------------------|-------------|------------|---------------|
|                     |                     | TICAM1-01   | rs1046673  | Ex1-250C>T    |
|                     |                     | TICAM1-06   | rs4807650  | -3222G>A      |
|                     |                     | TICAM1-07   | rs4807651  | -4465T>C      |
|                     |                     | TICAM1-04   | rs11667267 | -5299T>C      |
| TLR1/TLR6<br>/TLR10 | TLR1                | TLR1-02     |            | *2281G>A      |
|                     |                     | TLR10-04    |            | *959G>A       |
|                     | TLR6                | TLR10-01    | rs10856839 | Ex4+38A>C     |
|                     |                     | TLR10-05    | rs7653908  | IVS1+2321C>G  |
|                     |                     | TLR6-02     | rs1039559  | -501C>T       |
| TLR6-03             |                     | rs5743794   | -1632A>G   |               |
| TLR2                | TLR2                | TLR6-04     | rs6531670  | -3927G>A      |
|                     |                     | TLR2-17     | rs13150331 | -24437A>G     |
|                     |                     | TLR2-05     | rs3804100  | Ex3+1366T>C   |
| TLR3                | TLR3                | TLR2-20     | rs7656411  | *1240G>T      |
|                     |                     | TLR3-11     | rs956239   | -14431C>T     |
|                     |                     | TLR3-07     | rs4861699  | -13033A>G     |
|                     |                     | TLR3-09     | rs5743303  | -8920A>T      |
|                     |                     | TLR3-10     | rs5743305  | -8440T>A      |
|                     |                     | TLR3-03     | rs7657186  | IVS1+3637G>A  |
|                     |                     | TLR3-01     | rs13126816 | IVS1-3589G>A  |
|                     |                     | TLR3-05     | rs3775291  | Ex4+601C>T    |
|                     |                     | TLR3-08     | rs4862633  | *3944C>T      |
|                     |                     | TLR3-06     | rs4608848  | *4076C>T      |
|                     |                     | TLR4        | TLR4       | TLR4-07       |
| TLR4-29             | rs10759932          |             |            | -1606T>C      |
| TLR4-27             | rs2149356           |             |            | IVS3-468T>G   |
| TLR4-28             | rs5030728           |             |            | IVS3-385G>A   |
| TLR4-11             | rs11536889          |             |            | *1204C>G      |
| TLR4-23             | rs1927906           |             |            | *3188T>C      |
| TLR4-12             | rs1554973           |             |            | *3885C>T      |
| TLR4-32             | rs7044464           |             |            | *4470A>T      |
| TLR9                | PTK9L               |             |            | PTK9L-01      |
|                     |                     | PTK9L-02    | rs353547   | IVS2+179A>G   |
| TNFRSF18<br>TNFSF18 | TNFRSF18<br>TNFSF18 | TNFRSF18-01 | rs9729550  | *3728T>G      |
|                     |                     | TNFSF18-03  | rs975074   | IVS1-658G>T   |
|                     |                     | TNFSF18-01  | rs2236876  | IVS1+2395C>T  |
|                     |                     | TNFSF18-02  | rs723858   | IVS1+1618A>T  |
| TNFSF9              | TNFSF9              | TNFSF18-04  | rs7537126  | -1312G>A      |
|                     |                     | TNFSF9-01   | rs12151125 | -6641G>T      |
|                     |                     | TNFSF9-02   | rs348337   | -391C>T       |
|                     |                     | TNFSF9-04   | rs348390   | *1584A>G      |
| TOLLIP              | TOLLIP              | TOLLIP-08   | rs3750919  | *5437C>T      |
|                     |                     | TOLLIP-03   | rs3829223  | IVS5-1923G>A  |
|                     |                     | TOLLIP-02   | rs3793964  | IVS5-3499A>G  |
|                     |                     | TOLLIP-01   | rs11042484 | IVS1-1288C>T  |
|                     |                     | TOLLIP-05   | rs5743899  | IVS1-6540G>A  |
| TRAM1               | TRAM1               | TOLLIP-04   | rs5743867  | IVS1+2345C>T  |
|                     |                     | TRAM1-02    | rs2622653  | IVS10-1960T>C |
|                     |                     | TRAM1-06    | rs268626   | IVS4+37T>C    |
|                     |                     | TRAM1-03    | rs268593   | IVS1-60G>A    |



|       |       |          |            |               |
|-------|-------|----------|------------|---------------|
|       |       | TRAM1-04 | rs268594   | IVS1-813A>G   |
|       |       | TRAM1-07 | rs13271014 | -8831T>C      |
| TSLP  | TSLP  | TSLP-08  | rs764916   | -7397C>G      |
|       |       | TSLP-09  | rs764917   | -7081A>C      |
|       |       | TSLP-07  | rs1837253  | -5716T>C      |
|       |       | TSLP-04  | rs1898671  | IVS1+243C>T   |
|       |       | TSLP-01  | rs11466741 | IVS2+75C>T    |
|       |       | TSLP-05  | rs2289277  | Ex3+42C>G     |
|       |       | TSLP-06  | rs2289278  | Ex3+123C>G    |
|       |       | TSLP-02  | rs11466749 | Ex4+942A>G    |
|       |       | TSLP-03  | rs11466750 | Ex4-831G>A    |
| VCAM1 | VCAM1 | VCAM1-51 | rs1582091  | -8283T>G      |
|       |       | VCAM1-02 | rs1041163  | -1591C>T      |
|       |       | VCAM1-57 | rs3176860  | IVS2+912A>G   |
|       |       | VCAM1-73 | rs3917010  | IVS4+420A>C   |
|       |       | VCAM1-61 | rs3176867  | IVS4-458C>T   |
|       |       | VCAM1-74 | rs3917012  | IVS5+721G>T   |
|       |       | VCAM1-62 | rs3176869  | IVS5-321A>T   |
|       |       | VCAM1-68 | rs3181088  | IVS7+468C>T   |
|       |       | VCAM1-65 | rs3176874  | IVS7-172A>G   |
|       |       | VCAM1-77 | rs3917018  | IVS8-1457A>G  |
| XDH   | XDH   | XDH-50   | rs10490361 | *5274G>C      |
|       |       | XDH-52   | rs207432   | *4836T>G      |
|       |       | XDH-49   | rs9308919  | IVS30+909A>G  |
|       |       | XDH-37   | rs17038412 | IVS24+1809A>T |
|       |       | XDH-36   | rs1429376  | IVS22-151T>G  |
|       |       | XDH-33   | rs12621192 | IVS22+178G>A  |
|       |       | XDH-44   | rs2163059  | IVS12-292T>C  |
|       |       | XDH-47   | rs6718606  | IVS12-765G>C  |
|       |       | XDH-45   | rs3769618  | IVS11+420G>A  |
|       |       | XDH-39   | rs206849   | IVS6-2088T>C  |
|       |       | XDH-40   | rs206855   | IVS6+3391T>A  |
|       |       | XDH-41   | rs206858   | IVS6+1267C>G  |
|       |       | XDH-42   | rs206860   | IVS4-1239C>T  |
|       |       | XDH-46   | rs494852   | IVS3-642G>A   |
|       |       | XDH-35   | rs1429372  | IVS2-375T>C   |
|       |       | XDH-38   | rs206811   | IVS1+576T>C   |
|       |       | XDH-53   | rs4952236  | -7406C>A      |

Supplementary Table 2. Effect on total WBC counts of SNPs of innate immunity genes by benzene exposure status<sup>1</sup>.

| Gene            | SNP        |       | Controls | WBC <sup>2</sup> | P     | Exposed | WBC <sup>2</sup> | P      |
|-----------------|------------|-------|----------|------------------|-------|---------|------------------|--------|
| <i>ACAD11</i>   | rs11927882 | AA    | 51       | 6786±185         |       | 132     | 5512±139         |        |
|                 |            | AG    | 40       | 6205±168         | 0.179 | 87      | 5536±127         | 0.789  |
|                 |            | GG    | 12       | 6383±135         | 0.579 | 10      | 4970±932         | 0.421  |
|                 |            | GG+AG | 52       | 6246±159         | 0.199 | 97      | 5477±124         | 0.919  |
|                 |            | Trend |          |                  | 0.295 |         |                  | 0.875  |
| <i>ACAD11</i>   | rs2305623  | GG    | 32       | 6978±178         |       | 73      | 5642±143         |        |
|                 |            | GT    | 54       | 6254±171         | 0.131 | 115     | 5437±132         | 0.509  |
|                 |            | TT    | 17       | 6465±164         | 0.314 | 40      | 5455±118         | 0.789  |
|                 |            | TT+GT | 71       | 6304±169         | 0.131 | 155     | 5442±128         | 0.544  |
|                 |            | Trend |          |                  | 0.214 |         |                  | 0.700  |
| <i>ICHTHYIN</i> | rs3734029  | CC    | 44       | 6725±183         |       | 103     | 5490±131         |        |
|                 |            | CT    | 42       | 6386±180         | 0.557 | 111     | 5409±126         | 0.710  |
|                 |            | TT    | 17       | 6282±131         | 0.268 | 16      | 6175±172         | 0.038  |
|                 |            | TT+CT | 59       | 6356±166         | 0.398 | 127     | 5506±135         | 0.837  |
|                 |            | Trend |          |                  | 0.287 |         |                  | 0.278  |
| <i>ADAM19</i>   | rs10067096 | AA    | 103      | 6514±174         |       | 226     | 5500±133         |        |
|                 |            | AC    |          |                  |       | 4       | 5450±128         | 0.787  |
| <i>ADAM19</i>   | rs4704871  | TT    | 45       | 6678±183         |       | 105     | 5460±131         |        |
|                 |            | CT    | 41       | 6429±180         | 0.726 | 111     | 5454±126         | 0.960  |
|                 |            | CC    | 17       | 6282±131         | 0.314 | 14      | 6143±184         | 0.091  |
|                 |            | CC+CT | 58       | 6386±166         | 0.530 | 125     | 5531±135         | 0.645  |
|                 |            | Trend |          |                  | 0.366 |         |                  | 0.286  |
| <i>ADAM19</i>   | rs1990950  | TT    | 43       | 6753±184         |       | 105     | 5460±131         |        |
|                 |            | GT    | 35       | 6331±186         | 0.559 | 111     | 5454±126         | 0.960  |
|                 |            | GG    | 23       | 6470±134         | 0.459 | 14      | 6143±184         | 0.091  |
|                 |            | GG+GT | 58       | 6386±166         | 0.454 | 125     | 5531±135         | 0.645  |
|                 |            | Trend |          |                  | 0.436 |         |                  | 0.286  |
| <i>ADAM19</i>   | rs11466782 | AA    | 71       | 6477±168         |       | 171     | 5394±126         |        |
|                 |            | AG    | 27       | 6604±198         | 0.890 | 56      | 5841±151         | 0.092  |
|                 |            | GG    | 5        | 6540±149         | 0.842 | 3       | 5067±643         | 0.355  |
|                 |            | GG+AG | 32       | 6594±189         | 0.855 | 59      | 5802±148         | 0.126  |
|                 |            | Trend |          |                  | 0.830 |         |                  | 0.205  |
| <i>ADAM19</i>   | rs17054657 | CC    | 83       | 6583±165         |       | 188     | 5443±125         |        |
|                 |            | CT    | 17       | 6053±214         | 0.153 | 41      | 5778±162         | 0.261  |
|                 |            | TT    | 3        | 7200±151         | 0.409 | 1       | 4600             | <0.001 |
|                 |            | TT+CT | 20       | 6225±207         | 0.300 | 42      | 5750±161         | 0.346  |
|                 |            | Trend |          |                  | 0.578 |         |                  | 0.484  |
| <i>ADAM19</i>   | rs2863747  | CC    | 75       | 6549±168         |       | 185     | 5426±123         |        |
|                 |            | CG    | 24       | 6388±196         | 0.548 | 43      | 5874±164         | 0.150  |
|                 |            | GG    | 4        | 6600±172         | 0.690 | 1       | 4600             | <0.001 |
|                 |            | GG+CG | 28       | 6418±190         | 0.670 | 44      | 5845±163         | 0.206  |
|                 |            | Trend |          |                  | 0.832 |         |                  | 0.318  |
| <i>ADAM19</i>   | rs1422795  | TT    | 68       | 6631±172         |       | 164     | 5439±124         |        |
|                 |            | CT    | 29       | 6141±179         | 0.181 | 62      | 5582±131         | 0.326  |
|                 |            | CC    | 6        | 6983±163         | 0.410 | 4       | 6650±376         | 0.817  |
|                 |            | CC+CT | 35       | 6286±177         | 0.337 | 66      | 5647±152         | 0.329  |
|                 |            |       |          |                  |       |         |                  |        |

|               |            |       |    |          |       |     |          |        |
|---------------|------------|-------|----|----------|-------|-----|----------|--------|
|               |            | Trend |    |          | 0.660 |     |          | 0.418  |
| <i>ADAM19</i> | rs1422794  | TT    | 80 | 6625±183 |       | 186 | 5520±139 |        |
|               |            | GT    | 21 | 6095±128 | 0.108 | 43  | 5400±105 | 0.924  |
|               |            | GG    | 2  | 6450±233 | 0.927 |     |          |        |
|               |            | GG+GT | 23 | 6126±132 | 0.140 | 43  | 5400±105 | 0.924  |
|               |            | Trend |    |          | 0.238 |     |          | 0.924  |
| <i>ADAM19</i> | rs6860540  | AA    | 55 | 6820±180 |       | 125 | 5464±128 |        |
|               |            | AG    | 37 | 6038±163 | 0.035 | 94  | 5477±126 | 0.940  |
|               |            | GG    | 11 | 6582±154 | 0.898 | 11  | 6082±218 | 0.334  |
|               |            | GG+AG | 48 | 6163±161 | 0.077 | 105 | 5540±138 | 0.691  |
|               |            | Trend |    |          | 0.263 |     |          | 0.465  |
| <i>ADAM19</i> | rs4368711  | CC    | 66 | 6589±173 |       | 161 | 5401±121 |        |
|               |            | CT    | 30 | 6317±179 | 0.493 | 65  | 5671±136 | 0.155  |
|               |            | TT    | 7  | 6643±174 | 0.756 | 4   | 6650±376 | 0.802  |
|               |            | TT+CT | 37 | 6378±176 | 0.614 | 69  | 5728±156 | 0.166  |
|               |            | Trend |    |          | 0.810 |     |          | 0.263  |
| <i>ADAM19</i> | rs2042247  | AA    | 46 | 6700±172 |       | 122 | 5389±120 |        |
|               |            | AG    | 38 | 6261±194 | 0.288 | 94  | 5591±135 | 0.204  |
|               |            | GG    | 18 | 6578±134 | 0.960 | 13  | 5838±216 | 0.514  |
|               |            | GG+AG | 56 | 6363±177 | 0.405 | 107 | 5621±146 | 0.174  |
|               |            | Trend |    |          | 0.697 |     |          | 0.233  |
| <i>ADAM19</i> | rs10454970 | GG    | 91 | 6581±178 |       | 197 | 5511±125 |        |
|               |            | AG    | 12 | 6000±134 | 0.248 | 33  | 5427±173 | 0.963  |
| <i>ADAM19</i> | rs11742401 | CC    | 84 | 6648±174 |       | 188 | 5413±122 |        |
|               |            | CT    | 14 | 5593±160 | 0.010 | 40  | 5968±168 | 0.116  |
|               |            | TT    | 4  | 6600±172 | 0.729 | 1   | 4600     | <0.001 |
|               |            | TT+CT | 18 | 5817±163 | 0.043 | 41  | 5934±167 | 0.157  |
|               |            | Trend |    |          | 0.192 |     |          | 0.256  |
| <i>ADAM19</i> | rs17054692 | AA    | 79 | 6648±185 |       | 174 | 5479±126 |        |
|               |            | AG    | 22 | 6059±127 | 0.252 | 54  | 5563±154 | 0.553  |
|               |            | GG    | 2  | 6200±707 | 0.797 | 2   | 5500±141 | 0.161  |
|               |            | GG+AG | 24 | 6071±122 | 0.290 | 56  | 5561±151 | 0.519  |
|               |            | Trend |    |          | 0.356 |     |          | 0.481  |
| <i>ADAM19</i> | rs9313634  | CC    | 53 | 6764±179 |       | 113 | 5366±121 |        |
|               |            | CT    | 38 | 6161±173 | 0.154 | 105 | 5556±128 | 0.182  |
|               |            | TT    | 12 | 6525±138 | 0.885 | 12  | 6242±232 | 0.180  |
|               |            | TT+CT | 50 | 6248±165 | 0.219 | 117 | 5626±142 | 0.103  |
|               |            | Trend |    |          | 0.413 |     |          | 0.081  |
| <i>ADAM19</i> | rs6895161  | CC    | 69 | 6562±170 |       | 162 | 5366±119 |        |
|               |            | CT    | 30 | 6390±186 | 0.499 | 67  | 5833±158 | 0.023  |
|               |            | TT    | 4  | 6600±172 | 0.720 | 1   | 4600     | <0.001 |
|               |            | TT+CT | 34 | 6415±182 | 0.591 | 68  | 5815±157 | 0.035  |
|               |            | Trend |    |          | 0.743 |     |          | 0.071  |
| <i>ADAM19</i> | rs1363618  | AA    | 48 | 6392±176 |       | 93  | 5470±128 |        |
|               |            | AC    | 52 | 6598±175 | 0.449 | 108 | 5469±135 | 0.779  |
|               |            | CC    | 3  | 7000±147 | 0.534 | 29  | 5700±141 | 0.651  |
|               |            | CC+AC | 55 | 6620±172 | 0.437 | 137 | 5518±136 | 0.696  |
|               |            | Trend |    |          | 0.420 |     |          | 0.637  |
| <i>ADAM19</i> | rs10060687 | GG    | 47 | 6428±176 |       | 92  | 5465±129 |        |

|        |            |       |    |          |       |     |          |       |
|--------|------------|-------|----|----------|-------|-----|----------|-------|
|        |            | AG    | 52 | 6571±176 | 0.553 | 108 | 5469±135 | 0.740 |
|        |            | AA    | 4  | 6775±128 | 0.998 | 29  | 5700±141 | 0.628 |
|        |            | AA+AG | 56 | 6586±173 | 0.566 | 137 | 5518±136 | 0.657 |
|        |            | Trend |    |          | 0.597 |     |          | 0.605 |
| ADAM19 | rs17054709 | CC    | 49 | 6355±176 |       | 96  | 5471±128 |       |
|        |            | CT    | 51 | 6637±174 | 0.344 | 106 | 5467±134 | 0.836 |
|        |            | TT    | 3  | 7000±147 | 0.503 | 28  | 5714±144 | 0.691 |
|        |            | TT+CT | 54 | 6657±172 | 0.333 | 134 | 5519±136 | 0.753 |
|        |            | Trend |    |          | 0.320 |     |          | 0.689 |
| ADAM19 | rs6896064  | TT    | 67 | 6561±173 |       | 168 | 5374±119 |       |
|        |            | GT    | 24 | 6158±194 | 0.313 | 58  | 5809±156 | 0.034 |
|        |            | GG    | 12 | 6958±126 | 0.292 | 2   | 4750±212 | 0.023 |
|        |            | GG+GT | 36 | 6425±177 | 0.713 | 60  | 5773±155 | 0.059 |
|        |            | Trend |    |          | 0.797 |     |          | 0.133 |
| ADAM19 | rs12187501 | CC    | 49 | 6355±176 |       | 93  | 5470±128 |       |
|        |            | CT    | 51 | 6637±174 | 0.344 | 106 | 5443±135 | 0.942 |
|        |            | TT    | 3  | 7000±147 | 0.503 | 31  | 5774±140 | 0.389 |
|        |            | TT+CT | 54 | 6657±172 | 0.333 | 137 | 5518±136 | 0.696 |
|        |            | Trend |    |          | 0.320 |     |          | 0.464 |
| ADAM19 | rs4704883  | GG    | 29 | 6507±191 |       | 55  | 5393±122 |       |
|        |            | GT    | 49 | 6427±163 | 0.725 | 117 | 5347±118 | 0.765 |
|        |            | TT    | 25 | 6692±179 | 0.716 | 58  | 5905±161 | 0.059 |
|        |            | TT+GT | 74 | 6516±168 | 0.701 | 175 | 5532±136 | 0.277 |
|        |            | Trend |    |          | 0.709 |     |          | 0.060 |
| ADAM19 | rs17054724 | CC    | 59 | 6314±169 |       | 116 | 5500±127 |       |
|        |            | CT    | 43 | 6740±178 | 0.202 | 93  | 5385±134 | 0.495 |
|        |            | TT    | 1  | 8600     |       | 21  | 5995±152 | 0.299 |
|        |            | TT+CT | 44 | 6782±178 | 0.202 | 114 | 5497±139 | 0.857 |
|        |            | Trend |    |          | 0.202 |     |          | 0.634 |
| ADAM19 | rs11465254 | CC    | 93 | 6594±177 |       | 196 | 5507±136 |       |
|        |            | CT    | 9  | 5667±128 | 0.102 | 34  | 5450±116 | 0.829 |
|        |            | TT    | 1  | 6700     | 0.294 |     |          |       |
|        |            | TT+CT | 10 | 5770±125 | 0.144 | 34  | 5450±116 | 0.829 |
|        |            | Trend |    |          | 0.260 |     |          | 0.829 |
| ADAM19 | rs6556091  | AA    | 88 | 6643±178 |       | 195 | 5504±136 |       |
|        |            | AT    | 13 | 5654±132 | 0.061 | 35  | 5471±115 | 0.688 |
|        |            | TT    | 2  | 6400±424 | 0.766 |     |          |       |
|        |            | TT+AT | 15 | 5753±126 | 0.070 | 35  | 5471±115 | 0.688 |
|        |            | Trend |    |          | 0.108 |     |          | 0.688 |
| ALOX12 | rs2292350  | GG    | 64 | 6388±163 |       | 88  | 5580±129 |       |
|        |            | AG    | 31 | 6652±185 | 0.862 | 101 | 5412±125 | 0.417 |
|        |            | AA    | 8  | 6988±220 | 0.757 | 38  | 5455±149 | 0.525 |
|        |            | AA+AG | 39 | 6721±190 | 0.788 | 139 | 5424±131 | 0.371 |
|        |            | Trend |    |          | 0.748 |     |          | 0.438 |
| ALOX12 | rs434473   | AA    | 25 | 6480±167 |       | 75  | 5480±143 |       |
|        |            | AG    | 49 | 6602±188 | 0.952 | 100 | 5577±139 | 0.366 |
|        |            | GG    | 29 | 6393±157 | 0.780 | 55  | 5382±105 | 0.996 |
|        |            | GG+AG | 78 | 6524±177 | 0.878 | 155 | 5508±128 | 0.518 |
|        |            | Trend |    |          | 0.780 |     |          | 0.886 |

|         |            |       |    |          |       |     |          |       |
|---------|------------|-------|----|----------|-------|-----|----------|-------|
| ALOX12  | rs312462   | GG    | 75 | 6521±170 |       | 174 | 5527±136 |       |
|         |            | AG    | 25 | 6536±197 | 0.488 | 47  | 5468±128 | 0.730 |
|         |            | AA    | 3  | 6133±569 | 0.828 | 9   | 5111±843 | 0.127 |
|         |            | AA+AG | 28 | 6493±187 | 0.491 | 56  | 5411±122 | 0.461 |
|         |            | Trend |    |          | 0.514 |     |          | 0.261 |
| ALOX12  | rs2271316  | CC    | 47 | 6528±166 |       | 52  | 5594±144 |       |
|         |            | CG    | 33 | 6236±137 | 0.633 | 109 | 5493±122 | 0.710 |
|         |            | GG    | 23 | 6883±229 | 0.600 | 65  | 5480±144 | 0.482 |
|         |            | GG+CG | 56 | 6502±181 | 0.904 | 174 | 5488±130 | 0.567 |
|         |            | Trend |    |          | 0.657 |     |          | 0.480 |
| ALOX15B | rs4383207  | AA    | 48 | 6415±155 |       | 103 | 5491±124 |       |
|         |            | AG    | 43 | 6677±177 | 0.562 | 106 | 5519±146 | 0.886 |
|         |            | GG    | 12 | 6325±234 | 0.663 | 20  | 5410±108 | 0.920 |
|         |            | GG+AG | 55 | 6600±189 | 0.730 | 126 | 5502±140 | 0.918 |
|         |            | Trend |    |          | 0.959 |     |          | 0.984 |
| ALOX15B | rs4468690  | CC    | 44 | 6432±158 |       | 103 | 5487±139 |       |
|         |            | CT    | 48 | 6783±190 | 0.456 | 99  | 5507±119 | 0.567 |
|         |            | TT    | 11 | 5664±139 | 0.061 | 28  | 5511±158 | 0.622 |
|         |            | TT+CT | 59 | 6575±185 | 0.865 | 127 | 5508±127 | 0.524 |
|         |            | Trend |    |          | 0.404 |     |          | 0.529 |
| ALOX15B | rs4247362  | TT    | 44 | 6598±173 |       | 81  | 5504±136 |       |
|         |            | CT    | 49 | 6471±157 | 0.749 | 120 | 5542±135 | 0.733 |
|         |            | CC    | 10 | 6350±257 | 0.425 | 28  | 5343±116 | 0.728 |
|         |            | CC+CT | 59 | 6451±175 | 0.542 | 148 | 5504±131 | 0.845 |
|         |            | Trend |    |          | 0.430 |     |          | 0.899 |
| ALOX15B | rs8078865  | CC    | 56 | 6648±186 |       | 151 | 5549±134 |       |
|         |            | CT    | 41 | 6337±167 | 0.608 | 68  | 5393±137 | 0.494 |
|         |            | TT    | 6  | 6467±814 | 0.784 | 11  | 5464±936 | 0.566 |
|         |            | TT+CT | 47 | 6353±158 | 0.606 | 79  | 5403±131 | 0.615 |
|         |            | Trend |    |          | 0.619 |     |          | 0.816 |
| ALOX15B | rs9916382  | CC    | 31 | 6597±182 |       | 66  | 5338±140 |       |
|         |            | CT    | 60 | 6462±171 | 0.853 | 114 | 5592±134 | 0.213 |
|         |            | TT    | 12 | 6558±180 | 0.931 | 49  | 5522±120 | 0.650 |
|         |            | TT+CT | 72 | 6478±171 | 0.855 | 163 | 5571±129 | 0.274 |
|         |            | Trend |    |          | 0.892 |     |          | 0.543 |
| ALOX12B | rs9911644  | GG    | 48 | 6683±178 |       | 105 | 5492±141 |       |
|         |            | AG    | 50 | 6412±176 | 0.889 | 103 | 5600±123 | 0.611 |
|         |            | AA    | 5  | 5900±735 | 0.404 | 22  | 5055±131 | 0.132 |
|         |            | AA+AG | 55 | 6365±170 | 0.820 | 125 | 5504±126 | 0.979 |
|         |            | Trend |    |          | 0.701 |     |          | 0.421 |
| ALOX12B | rs3935951  | CC    | 60 | 6637±173 |       | 131 | 5537±144 |       |
|         |            | CT    | 34 | 6026±160 | 0.087 | 86  | 5457±118 | 0.676 |
|         |            | TT    | 8  | 7150±164 | 0.972 | 12  | 5483±112 | 0.744 |
|         |            | TT+CT | 42 | 6240±165 | 0.130 | 98  | 5460±116 | 0.653 |
|         |            | Trend |    |          | 0.292 |     |          | 0.642 |
| ALOX12B | rs12943817 | CC    | 72 | 6414±165 |       | 152 | 5490±119 |       |
|         |            | CT    | 29 | 6834±194 | 0.200 | 68  | 5441±144 | 0.776 |
|         |            | TT    | 2  | 5450±134 | 0.131 | 10  | 6020±232 | 0.852 |
|         |            | TT+CT | 31 | 6745±192 | 0.303 | 78  | 5515±157 | 0.847 |
|         |            |       |    |          |       |     |          |       |

|         |            |       |    |          |       |       |          |       |
|---------|------------|-------|----|----------|-------|-------|----------|-------|
|         |            | Trend |    |          | 0.509 |       |          | 0.947 |
| ALOX12B | rs12937410 | GG    | 67 | 6416±173 |       | 151   | 5397±137 |       |
|         |            | AG    | 31 | 6887±177 | 0.163 | 66    | 5703±125 | 0.081 |
|         |            | AA    | 5  | 5500±122 | 0.152 | 13    | 5638±118 | 0.736 |
|         |            | AA+AG | 36 | 6694±176 | 0.407 | 79    | 5692±123 | 0.098 |
|         |            | Trend |    |          |       | 0.903 |          |       |
| ALOX12B | rs6503075  | GG    | 44 | 6520±176 |       | 97    | 5520±140 |       |
|         |            | AG    | 50 | 6614±183 | 0.463 | 107   | 5590±127 | 0.842 |
|         |            | AA    | 9  | 5922±919 | 0.627 | 26    | 5046±123 | 0.132 |
|         |            | AA+AG | 59 | 6508±173 | 0.563 | 133   | 5483±127 | 0.774 |
|         |            | Trend |    |          |       | 0.832 |          |       |
| ALOX12B | rs6503076  | TT    | 26 | 6646±193 |       | 81    | 5489±144 |       |
|         |            | CT    | 44 | 6275±180 | 0.535 | 119   | 5480±133 | 0.936 |
|         |            | CC    | 33 | 6727±148 | 0.832 | 30    | 5600±988 | 0.479 |
|         |            | CC+CT | 77 | 6469±168 | 0.782 | 149   | 5504±127 | 0.910 |
|         |            | Trend |    |          |       | 0.775 |          |       |
| ALOX12B | rs2304908  | GG    | 45 | 6287±142 |       | 83    | 5557±119 |       |
|         |            | CG    | 50 | 6700±197 | 0.315 | 112   | 5513±132 | 0.749 |
|         |            | CC    | 8  | 6625±186 | 0.722 | 34    | 5347±165 | 0.408 |
|         |            | CC+CG | 58 | 6690±194 | 0.316 | 146   | 5474±140 | 0.947 |
|         |            | Trend |    |          |       | 0.402 |          |       |
| ALOX12B | rs7219450  | TT    | 27 | 6619±165 |       | 73    | 5262±143 |       |
|         |            | AT    | 56 | 6389±180 | 0.643 | 109   | 5616±130 | 0.078 |
|         |            | AA    | 20 | 6720±172 | 0.522 | 46    | 5617±121 | 0.312 |
|         |            | AA+AT | 76 | 6476±178 | 0.885 | 155   | 5616±127 | 0.091 |
|         |            | Trend |    |          |       | 0.590 |          |       |
| ALOX12B | rs4360988  | TT    | 28 | 6686±162 |       | 70    | 5347±136 |       |
|         |            | GT    | 58 | 6545±189 | 0.736 | 115   | 5577±136 | 0.208 |
|         |            | GG    | 17 | 6124±134 | 0.409 | 44    | 5564±118 | 0.635 |
|         |            | GG+GT | 75 | 6449±178 | 0.590 | 159   | 5573±131 | 0.253 |
|         |            | Trend |    |          |       | 0.421 |          |       |
| ALOX12B | rs2278635  | AA    | 36 | 6308±164 |       | 96    | 5277±115 |       |
|         |            | AG    | 55 | 6820±186 | 0.145 | 101   | 5672±135 | 0.005 |
|         |            | GG    | 12 | 5725±106 | 0.044 | 32    | 5634±165 | 0.256 |
|         |            | GG+AG | 67 | 6624±179 | 0.465 | 133   | 5663±143 | 0.007 |
|         |            | Trend |    |          |       | 0.539 |          |       |
| ALOX12B | rs4792199  | CC    | 52 | 6463±169 |       | 98    | 5533±117 |       |
|         |            | CT    | 40 | 6600±176 | 0.521 | 99    | 5304±112 | 0.588 |
|         |            | TT    | 9  | 6544±226 | 0.954 | 32    | 5984±208 | 0.343 |
|         |            | TT+CT | 49 | 6590±183 | 0.584 | 131   | 5470±144 | 0.885 |
|         |            | Trend |    |          |       | 0.748 |          |       |
| ALOX12B | rs4792203  | CC    | 70 | 6543±173 |       | 146   | 5476±115 |       |
|         |            | CT    | 32 | 6453±180 | 0.827 | 74    | 5485±141 | 0.979 |
|         |            | TT    | 1  | 6400     | 0.570 | 10    | 5930±264 | 0.902 |
|         |            | TT+CT | 33 | 6452±178 | 0.815 | 84    | 5538±159 | 0.979 |
|         |            | Trend |    |          |       | 0.797 |          |       |
| ALOX12B | rs16957160 | GG    | 92 | 6489±166 |       | 204   | 5468±130 |       |
|         |            | AG    | 11 | 6718±234 | 0.681 | 22    | 5623±141 | 0.532 |
| ALOX15  | rs916055   | AA    | 51 | 6424±166 |       | 67    | 5349±117 |       |

|        |            |       |    |          |        |     |          |        |
|--------|------------|-------|----|----------|--------|-----|----------|--------|
|        |            | AG    | 43 | 6665±177 | 0.287  | 115 | 5592±138 | 0.282  |
|        |            | GG    | 9  | 6300±215 | 0.759  | 47  | 5509±142 | 0.450  |
|        |            | GG+AG | 52 | 6602±182 | 0.428  | 162 | 5568±138 | 0.280  |
|        |            | Trend |    |          | 0.761  |     |          | 0.394  |
| ALOX15 | rs7217186  | TT    | 48 | 6554±171 |        | 67  | 5240±106 |        |
|        |            | CT    | 38 | 6416±201 | 0.996  | 117 | 5647±142 | 0.116  |
|        |            | CC    | 17 | 6618±111 | 0.800  | 44  | 5518±142 | 0.160  |
|        |            | CC+CT | 55 | 6478±177 | 0.937  | 161 | 5612±142 | 0.085  |
|        |            | Trend |    |          | 0.860  |     |          | 0.124  |
| ALOX15 | rs2664593  | CC    | 62 | 6485±180 |        | 148 | 5657±140 |        |
|        |            | CG    | 36 | 6592±174 | 0.769  | 73  | 5240±116 | 0.013  |
|        |            | GG    | 5  | 6300±943 | 0.451  | 9   | 5000±897 | 0.306  |
|        |            | GG+CG | 41 | 6556±165 | 0.692  | 82  | 5213±113 | 0.009  |
|        |            | Trend |    |          | 0.598  |     |          | 0.014  |
| ALOX15 | rs748694   | TT    | 44 | 6275±149 |        | 121 | 5402±126 |        |
|        |            | CT    | 47 | 6757±195 | 0.301  | 96  | 5657±143 | 0.118  |
|        |            | CC    | 12 | 6433±170 | 0.879  | 12  | 5308±978 | 0.597  |
|        |            | CC+CT | 59 | 6692±189 | 0.393  | 108 | 5619±139 | 0.185  |
|        |            | Trend |    |          | 0.681  |     |          | 0.369  |
| ALOX5  | rs1864414  | TT    | 74 | 6342±161 |        | 150 | 5458±133 |        |
|        |            | GT    | 28 | 6911±201 | 0.098  | 74  | 5497±132 | 0.814  |
|        |            | GG    | 1  | 8100     | <0.001 | 5   | 6680±108 | 0.070  |
|        |            | GG+GT | 29 | 6952±199 | 0.070  | 79  | 5572±133 | 0.925  |
|        |            | Trend |    |          | 0.042  |     |          | 0.582  |
| ALOX5  | rs4948671  | TT    | 71 | 6670±181 |        | 173 | 5622±131 |        |
|        |            | CT    | 31 | 6181±156 | 0.174  | 54  | 5141±133 | 0.003  |
|        |            | CC    | 1  | 5700     | <0.001 | 3   | 4833±145 | 0.122  |
|        |            | CC+CT | 32 | 6166±154 | 0.133  | 57  | 5125±132 | 0.002  |
|        |            | Trend |    |          | 0.090  |     |          | 0.001  |
| ALOX5  | rs7918542  | AA    | 74 | 6341±161 |        | 150 | 5441±135 |        |
|        |            | AG    | 28 | 6914±201 | 0.100  | 75  | 5535±128 | 0.965  |
|        |            | GG    | 1  | 8100     | <0.001 | 5   | 6680±108 | 0.063  |
|        |            | GG+AG | 29 | 6955±198 | 0.073  | 80  | 5606±129 | 0.707  |
|        |            | Trend |    |          | 0.044  |     |          | 0.421  |
| ALOX5  | rs7099684  | TT    | 79 | 6670±174 |        | 172 | 5633±130 |        |
|        |            | AT    | 23 | 6013±169 | 0.061  | 52  | 5079±118 | 0.001  |
|        |            | AA    | 1  | 5700     | <0.001 | 3   | 4433±155 | 0.028  |
|        |            | AA+AT | 24 | 6000±165 | 0.041  | 55  | 5044±119 | <0.001 |
|        |            | Trend |    |          | 0.023  |     |          | <0.001 |
| ALOX5  | rs2115819  | GG    | 71 | 6666±173 |        | 154 | 5563±133 |        |
|        |            | AG    | 29 | 6238±179 | 0.149  | 67  | 5355±123 | 0.102  |
|        |            | AA    | 3  | 5567±709 | 0.020  | 7   | 5029±119 | 0.263  |
|        |            | AA+AG | 32 | 6175±172 | 0.100  | 74  | 5324±122 | 0.071  |
|        |            | Trend |    |          | 0.053  |     |          | 0.062  |
| ALOX5  | rs10900213 | TT    | 41 | 6544±165 |        | 93  | 5495±131 |        |
|        |            | GT    | 53 | 6436±189 | 0.583  | 115 | 5466±135 | 0.393  |
|        |            | GG    | 9  | 6833±123 | 0.264  | 21  | 5752±127 | 0.978  |
|        |            | GG+GT | 62 | 6494±181 | 0.772  | 136 | 5510±134 | 0.447  |
|        |            | Trend |    |          | 0.846  |     |          | 0.643  |

|         |            |       |     |          |       |     |          |       |
|---------|------------|-------|-----|----------|-------|-----|----------|-------|
| ALOX5   | rs12264801 | GG    | 31  | 6077±184 |       | 64  | 5344±130 |       |
|         |            | AG    | 45  | 6544±173 | 0.164 | 105 | 5402±121 | 0.593 |
|         |            | AA    | 27  | 6963±156 | 0.024 | 61  | 5828±149 | 0.131 |
|         |            | AA+AG | 72  | 6701±167 | 0.060 | 166 | 5558±133 | 0.291 |
|         |            | Trend |     |          | 0.024 |     |          | 0.135 |
| ALOX5   | rs3780901  | TT    | 65  | 6598±184 |       | 158 | 5454±127 |       |
|         |            | CT    | 37  | 6376±157 | 0.339 | 64  | 5634±148 | 0.955 |
|         |            | CC    | 1   | 6100     | 0.635 | 7   | 5443±132 | 0.828 |
|         |            | CC+CT | 38  | 6368±155 | 0.340 | 71  | 5615±145 | 0.914 |
|         |            | Trend |     |          | 0.345 |     |          | 0.868 |
| ALOX5   | rs3780906  | GG    | 67  | 6587±184 |       | 158 | 5454±127 |       |
|         |            | AG    | 35  | 6386±157 | 0.337 | 64  | 5634±148 | 0.955 |
|         |            | AA    | 1   | 6100     | 0.640 | 7   | 5443±132 | 0.828 |
|         |            | AA+AG | 36  | 6378±154 | 0.339 | 71  | 5615±145 | 0.914 |
|         |            | Trend |     |          | 0.344 |     |          | 0.868 |
| ALOX5   | rs1487562  | CC    | 101 | 6497±175 |       | 219 | 5467±133 |       |
|         |            | CT    | 2   | 7350±106 | 0.058 | 11  | 6127±106 | 0.276 |
| ALOX5   | rs901681   | GG    | 46  | 6546±188 |       | 105 | 5412±130 |       |
|         |            | GT    | 40  | 6623±164 | 0.723 | 96  | 5581±132 | 0.967 |
|         |            | TT    | 17  | 6171±161 | 0.433 | 27  | 5430±124 | 0.985 |
|         |            | TT+GT | 57  | 6488±163 | 0.957 | 123 | 5548±130 | 0.978 |
|         |            | Trend |     |          | 0.602 |     |          | 0.996 |
| ALOX5   | rs2291427  | GG    | 40  | 6633±194 |       | 119 | 5500±128 |       |
|         |            | AG    | 48  | 6598±161 | 0.794 | 86  | 5523±141 | 0.571 |
|         |            | AA    | 15  | 5927±155 | 0.141 | 24  | 5454±131 | 0.815 |
|         |            | AA+AG | 63  | 6438±161 | 0.498 | 110 | 5508±138 | 0.568 |
|         |            | Trend |     |          | 0.223 |     |          | 0.645 |
| ALOX5   | rs4948674  | CC    | 69  | 6738±172 |       | 146 | 5485±139 |       |
|         |            | AC    | 30  | 5843±163 | 0.008 | 77  | 5553±121 | 0.991 |
|         |            | AA    | 4   | 7675±150 | 0.197 | 7   | 5186±121 | 0.493 |
|         |            | AA+AC | 34  | 6059±171 | 0.027 | 84  | 5523±121 | 0.855 |
|         |            | Trend |     |          | 0.177 |     |          | 0.701 |
| ALOX5AP | rs4076128  | AA    | 43  | 6556±153 |       | 84  | 5658±142 |       |
|         |            | AG    | 47  | 6591±188 | 0.906 | 113 | 5406±124 | 0.593 |
|         |            | GG    | 13  | 6092±192 | 0.395 | 32  | 5438±137 | 0.425 |
|         |            | GG+AG | 60  | 6483±188 | 0.662 | 145 | 5413±127 | 0.484 |
|         |            | Trend |     |          | 0.457 |     |          | 0.407 |
| ALOX5AP | rs4073260  | AA    | 72  | 6663±176 |       | 157 | 5558±130 |       |
|         |            | AG    | 28  | 6004±139 | 0.137 | 65  | 5292±135 | 0.240 |
|         |            | GG    | 3   | 7700±330 | 0.659 | 7   | 6257±151 | 0.903 |
|         |            | GG+AG | 31  | 6168±165 | 0.280 | 72  | 5386±138 | 0.276 |
|         |            | Trend |     |          | 0.584 |     |          | 0.356 |
| ALOX5AP | rs4769055  | CC    | 30  | 6530±150 |       | 60  | 5737±161 |       |
|         |            | AC    | 45  | 6624±188 | 0.770 | 117 | 5426±120 | 0.386 |
|         |            | AA    | 28  | 6318±177 | 0.760 | 53  | 5389±123 | 0.318 |
|         |            | AA+AC | 73  | 6507±183 | 0.972 | 170 | 5415±120 | 0.316 |
|         |            | Trend |     |          | 0.760 |     |          | 0.313 |
| ALOX5AP | rs4075131  | AA    | 43  | 6647±181 |       | 113 | 5619±144 |       |
|         |            | AG    | 25  | 6200±172 | 0.358 | 89  | 5302±106 | 0.241 |



|                |            |       |    |          |        |     |          |       |
|----------------|------------|-------|----|----------|--------|-----|----------|-------|
|                |            | GG    | 35 | 6574±168 | 0.967  | 25  | 5520±139 | 0.282 |
|                |            | GG+AG | 60 | 6418±169 | 0.687  | 114 | 5350±114 | 0.173 |
|                |            | Trend |    |          | 0.981  |     |          | 0.177 |
| <i>ALOX5AP</i> | rs9578196  | CC    | 89 | 6591±168 |        | 210 | 5504±136 |       |
|                |            | CT    | 14 | 6021±205 | 0.285  | 20  | 5445±969 | 0.409 |
| <i>ALOX5AP</i> | rs10507391 | TT    | 38 | 6539±176 |        | 110 | 5562±143 |       |
|                |            | AT    | 45 | 6549±168 | 0.417  | 93  | 5415±115 | 0.959 |
|                |            | AA    | 20 | 6385±190 | 0.949  | 25  | 5352±127 | 0.329 |
|                |            | AA+AT | 65 | 6498±174 | 0.585  | 118 | 5402±117 | 0.715 |
|                |            | Trend |    |          | 0.929  |     |          | 0.470 |
| <i>ALOX5AP</i> | rs4769871  | CC    | 99 | 6580±174 |        | 220 | 5521±133 |       |
|                |            | CT    | 4  | 4875±650 | <0.001 | 9   | 5144±117 | 0.672 |
| <i>ALOX5AP</i> | rs4503649  | GG    | 46 | 6461±169 |        | 75  | 5303±120 |       |
|                |            | AG    | 48 | 6627±183 | 0.788  | 116 | 5520±126 | 0.068 |
|                |            | AA    | 9  | 6178±162 | 0.201  | 38  | 5853±169 | 0.059 |
|                |            | AA+AG | 57 | 6556±179 | 0.904  | 154 | 5602±138 | 0.027 |
|                |            | Trend |    |          | 0.521  |     |          | 0.034 |
| <i>ALOX5AP</i> | rs3885907  | AA    | 46 | 6465±173 |        | 119 | 5574±145 |       |
|                |            | AC    | 44 | 6495±177 | 0.975  | 90  | 5473±116 | 0.693 |
|                |            | CC    | 13 | 6746±176 | 0.529  | 20  | 5225±130 | 0.224 |
|                |            | CC+AC | 57 | 6553±175 | 0.791  | 110 | 5428±118 | 0.441 |
|                |            | Trend |    |          | 0.621  |     |          | 0.274 |
| <i>ALOX5AP</i> | rs10162089 | GG    | 41 | 6478±172 |        | 112 | 5629±146 |       |
|                |            | AG    | 50 | 6558±184 | 0.791  | 96  | 5440±117 | 0.551 |
|                |            | AA    | 12 | 6450±146 | 0.933  | 20  | 5175±126 | 0.117 |
|                |            | AA+AG | 62 | 6537±176 | 0.805  | 116 | 5394±118 | 0.306 |
|                |            | Trend |    |          | 0.853  |     |          | 0.151 |
| <i>ALOX5AP</i> | rs12431114 | AA    | 85 | 6525±175 |        | 203 | 5526±137 |       |
|                |            | AG    | 16 | 6456±182 | 0.968  | 26  | 5354±918 | 0.669 |
|                |            | GG    | 2  | 6500±424 | 0.281  |     |          |       |
|                |            | GG+AG | 18 | 6461±171 | 0.870  | 26  | 5354±918 | 0.669 |
|                |            | Trend |    |          | 0.763  |     |          | 0.669 |
| <i>ALOX5AP</i> | rs4254165  | AA    | 39 | 6400±166 |        | 65  | 5322±123 |       |
|                |            | AG    | 48 | 6700±181 | 0.585  | 117 | 5512±128 | 0.197 |
|                |            | GG    | 16 | 6231±174 | 0.310  | 47  | 5736±156 | 0.071 |
|                |            | GG+AG | 64 | 6583±179 | 0.934  | 164 | 5576±136 | 0.089 |
|                |            | Trend |    |          | 0.516  |     |          | 0.063 |
| <i>ALOX5AP</i> | rs4147063  | CC    | 38 | 6458±174 |        | 97  | 5565±153 |       |
|                |            | CT    | 46 | 6617±188 | 0.436  | 104 | 5503±108 | 0.851 |
|                |            | TT    | 19 | 6374±140 | 0.554  | 26  | 5108±117 | 0.104 |
|                |            | TT+CT | 65 | 6546±175 | 0.422  | 130 | 5424±111 | 0.693 |
|                |            | Trend |    |          | 0.491  |     |          | 0.260 |
| <i>ALOX5AP</i> | rs17245204 | CC    | 85 | 6501±178 |        | 204 | 5517±137 |       |
|                |            | CT    | 16 | 6581±167 | 0.582  | 26  | 5354±918 | 0.708 |
|                |            | TT    | 2  | 6500±424 | 0.244  |     |          |       |
|                |            | TT+CT | 18 | 6572±157 | 0.489  | 26  | 5354±918 | 0.708 |
|                |            | Trend |    |          | 0.402  |     |          | 0.708 |
| <i>ALOX5AP</i> | rs9579648  | GG    | 86 | 6542±178 |        | 202 | 5527±137 |       |
|                |            | CG    | 15 | 6353±162 | 0.983  | 28  | 5293±913 | 0.455 |

|                |            |       |    |          |       |     |          |       |
|----------------|------------|-------|----|----------|-------|-----|----------|-------|
|                |            | CC    | 2  | 6500±424 | 0.287 |     |          |       |
|                |            | CC+CG | 17 | 6371±152 | 0.888 | 28  | 5293±913 | 0.455 |
|                |            | Trend |    |          | 0.760 |     |          | 0.455 |
| <i>ALOX5AP</i> | rs10507393 | TT    | 47 | 6538±177 |       | 123 | 5550±142 |       |
|                |            | CT    | 40 | 6590±193 | 0.823 | 86  | 5466±110 | 0.898 |
|                |            | CC    | 16 | 6250±108 | 0.808 | 17  | 5206±137 | 0.268 |
|                |            | CC+CT | 56 | 6493±173 | 0.918 | 103 | 5423±114 | 0.608 |
|                |            | Trend |    |          | 0.931 |     |          | 0.376 |
| <i>ALOX5AP</i> | rs9315051  | AA    | 98 | 6556±174 |       | 222 | 5505±134 |       |
|                |            | AG    | 5  | 5680±164 | 0.066 | 8   | 5325±111 | 0.775 |
| <i>ALOX5AP</i> | rs3935645  | TT    | 28 | 6554±184 |       | 96  | 5570±154 |       |
|                |            | CT    | 57 | 6607±186 | 0.621 | 107 | 5541±114 | 0.717 |
|                |            | CC    | 18 | 6156±105 | 0.974 | 26  | 5108±117 | 0.107 |
|                |            | CC+CT | 75 | 6499±171 | 0.704 | 133 | 5456±116 | 0.818 |
|                |            | Trend |    |          | 0.942 |     |          | 0.304 |
| <i>ALOX5AP</i> | rs3935644  | GG    | 43 | 6316±160 |       | 72  | 5390±130 |       |
|                |            | AG    | 46 | 6700±188 | 0.522 | 118 | 5529±131 | 0.258 |
|                |            | AA    | 14 | 6507±168 | 0.755 | 39  | 5638±144 | 0.146 |
|                |            | AA+AG | 60 | 6655±183 | 0.675 | 157 | 5556±134 | 0.160 |
|                |            | Trend |    |          | 0.994 |     |          | 0.124 |
| <i>ALOX5AP</i> | rs4445746  | GG    | 69 | 6572±172 |       | 145 | 5491±117 |       |
|                |            | AG    | 31 | 6345±166 | 0.588 | 76  | 5447±157 | 0.470 |
|                |            | AA    | 3  | 6900±334 | 0.985 | 9   | 6056±146 | 0.972 |
|                |            | AA+AG | 34 | 6394±179 | 0.632 | 85  | 5512±156 | 0.502 |
|                |            | Trend |    |          | 0.736 |     |          | 0.569 |
| <i>ALOXE3</i>  | rs6503078  | GG    | 97 | 6515±174 |       | 219 | 5503±133 |       |
|                |            | GT    | 6  | 6483±175 | 0.924 | 11  | 5409±130 | 0.886 |
| <i>ALOXE3</i>  | rs3809882  | GG    | 50 | 6556±188 |       | 137 | 5463±139 |       |
|                |            | GT    | 45 | 6507±170 | 0.906 | 76  | 5638±124 | 0.701 |
|                |            | TT    | 8  | 6288±108 | 0.895 | 16  | 5219±122 | 0.494 |
|                |            | TT+GT | 53 | 6474±161 | 0.889 | 92  | 5565±124 | 0.936 |
|                |            | Trend |    |          | 0.878 |     |          | 0.799 |
| <i>ALOXE3</i>  | rs6503080  | TT    | 41 | 6356±183 |       | 121 | 5421±126 |       |
|                |            | CT    | 43 | 6581±174 | 0.340 | 88  | 5676±143 | 0.414 |
|                |            | CC    | 19 | 6700±157 | 0.620 | 20  | 5170±123 | 0.436 |
|                |            | CC+CT | 62 | 6618±168 | 0.360 | 108 | 5582±140 | 0.687 |
|                |            | Trend |    |          | 0.496 |     |          | 0.892 |
| <i>ALOXE3</i>  | rs9894356  | TT    | 89 | 6534±181 |       | 222 | 5516±134 |       |
|                |            | GT    | 14 | 6386±119 | 0.736 | 8   | 5025±947 | 0.454 |
| <i>ALOXE3</i>  | rs2289588  | TT    | 53 | 6402±178 |       | 114 | 5548±120 |       |
|                |            | CT    | 43 | 6691±172 | 0.336 | 95  | 5564±146 | 0.266 |
|                |            | CC    | 6  | 5850±138 | 0.185 | 20  | 4965±127 | 0.037 |
|                |            | CC+CT | 49 | 6588±169 | 0.545 | 115 | 5460±144 | 0.100 |
|                |            | Trend |    |          | 0.961 |     |          | 0.036 |
| <i>ALOXE3</i>  | rs9912048  | CC    | 17 | 6800±147 |       | 74  | 5277±124 |       |
|                |            | CT    | 55 | 6422±169 | 0.103 | 107 | 5709±148 | 0.050 |
|                |            | TT    | 31 | 6519±198 | 0.492 | 48  | 5396±102 | 0.543 |
|                |            | TT+CT | 86 | 6457±179 | 0.165 | 155 | 5612±136 | 0.092 |
|                |            | Trend |    |          | 0.746 |     |          | 0.370 |

|               |           |       |    |          |        |     |          |        |
|---------------|-----------|-------|----|----------|--------|-----|----------|--------|
| <i>ALOXE3</i> | rs7215288 | CC    | 28 | 6857±204 |        | 71  | 5428±125 |        |
|               |           | CT    | 51 | 6335±171 | 0.205  | 104 | 5605±129 | 0.375  |
|               |           | TT    | 24 | 6492±138 | 0.385  | 55  | 5389±148 | 0.625  |
|               |           | TT+CT | 75 | 6385±160 | 0.215  | 159 | 5530±136 | 0.675  |
|               |           | Trend |    |          |        |     |          | 0.357  |
| <i>ALOXE3</i> | rs7215658 | CC    | 25 | 6824±207 |        | 71  | 5428±125 |        |
|               |           | AC    | 53 | 6383±174 | 0.276  | 102 | 5573±124 | 0.467  |
|               |           | AA    | 25 | 6480±135 | 0.446  | 57  | 5454±157 | 0.855  |
|               |           | AA+AC | 78 | 6414±162 | 0.290  | 159 | 5530±136 | 0.675  |
|               |           | Trend |    |          |        |     |          | 0.444  |
| <i>ALOXE3</i> | rs9892383 | TT    | 82 | 6632±179 |        | 197 | 5540±125 |        |
|               |           | CT    | 18 | 5911±154 | 0.073  | 30  | 5400±172 | 0.468  |
|               |           | CC    | 1  | 6500     | 0.612  | 2   | 3850±71  | <0.001 |
|               |           | CC+CT | 19 | 5942±150 | 0.081  | 32  | 5303±170 | 0.292  |
|               |           | Trend |    |          |        |     |          | 0.112  |
| <i>ALOXE3</i> | rs3027208 | TT    | 20 | 5880±175 |        | 65  | 5620±141 |        |
|               |           | CT    | 52 | 6608±187 | 0.193  | 115 | 5462±121 | 0.557  |
|               |           | CC    | 31 | 6765±142 | 0.041  | 50  | 5426±148 | 0.328  |
|               |           | CC+CT | 83 | 6666±171 | 0.093  | 165 | 5451±129 | 0.432  |
|               |           | Trend |    |          |        |     |          | 0.039  |
| <i>ALOXE3</i> | rs3027215 | CC    | 90 | 6542±179 |        | 202 | 5557±137 |        |
|               |           | CT    | 12 | 6442±132 | 0.600  | 26  | 5131±913 | 0.187  |
|               |           | TT    | 1  | 4800     | <0.001 | 2   | 4350±354 | <0.001 |
|               |           | TT+CT | 13 | 6315±135 | 0.867  | 28  | 5075±905 | 0.102  |
|               |           | Trend |    |          |        |     |          | 0.867  |
| <i>BPI</i>    | rs7274607 | CC    | 85 | 6567±172 |        | 179 | 5583±132 |        |
|               |           | CT    | 18 | 6261±186 | 0.333  | 51  | 5204±133 | 0.114  |
| <i>BPI</i>    | rs4811656 | CC    | 34 | 6318±187 |        | 95  | 5445±130 |        |
|               |           | CG    | 52 | 6552±171 | 0.458  | 108 | 5510±126 | 0.805  |
|               |           | GG    | 17 | 6788±160 | 0.351  | 27  | 5641±168 | 0.427  |
|               |           | GG+CG | 69 | 6610±167 | 0.352  | 135 | 5536±135 | 0.628  |
|               |           | Trend |    |          |        |     |          | 0.320  |
| <i>BPI</i>    | rs1341022 | GG    | 24 | 6263±150 |        | 65  | 5492±121 |        |
|               |           | CG    | 54 | 6469±187 | 0.970  | 116 | 5532±130 | 0.887  |
|               |           | CC    | 25 | 6852±165 | 0.300  | 49  | 5429±154 | 0.875  |
|               |           | CC+CG | 79 | 6590±180 | 0.706  | 165 | 5501±137 | 0.867  |
|               |           | Trend |    |          |        |     |          | 0.295  |
| <i>BPI</i>    | rs5741798 | CC    | 34 | 6259±170 |        | 94  | 5506±134 |        |
|               |           | CG    | 57 | 6489±177 | 0.679  | 109 | 5441±117 | 0.822  |
|               |           | GG    | 12 | 7350±153 | 0.023  | 27  | 5704±181 | 0.601  |
|               |           | GG+CG | 69 | 6639±175 | 0.307  | 136 | 5493±132 | 0.999  |
|               |           | Trend |    |          |        |     |          | 0.067  |
| <i>BPI</i>    | rs6024718 | GG    | 43 | 6881±157 |        | 61  | 5300±124 |        |
|               |           | AG    | 46 | 6128±167 | 0.010  | 116 | 5534±129 | 0.378  |
|               |           | AA    | 14 | 6650±224 | 0.624  | 52  | 5573±140 | 0.354  |
|               |           | AA+AG | 60 | 6250±181 | 0.020  | 168 | 5546±132 | 0.309  |
|               |           | Trend |    |          |        |     |          | 0.177  |
| <i>BPI</i>    | rs6069668 | CC    | 70 | 6449±168 |        | 143 | 5630±136 |        |
|               |           | CG    | 24 | 6663±200 | 0.497  | 73  | 5233±122 | 0.058  |

|            |           |       |    |          |       |     |          |       |
|------------|-----------|-------|----|----------|-------|-----|----------|-------|
|            |           | GG    | 9  | 6622±159 | 0.588 | 14  | 5543±139 | 0.952 |
|            |           | GG+CG | 33 | 6652±187 | 0.437 | 87  | 5283±125 | 0.088 |
|            |           | Trend |    |          | 0.444 |     |          | 0.213 |
| <i>BPI</i> | rs6069672 | TT    | 61 | 6467±180 |       | 129 | 5546±139 |       |
|            |           | CT    | 27 | 6922±163 | 0.120 | 82  | 5387±121 | 0.435 |
|            |           | CC    | 15 | 5967±159 | 0.264 | 18  | 5656±142 | 0.737 |
|            |           | CC+CT | 42 | 6581±166 | 0.599 | 100 | 5435±125 | 0.555 |
|            |           | Trend |    |          | 0.743 |     |          | 0.789 |
| <i>BPI</i> | rs5741800 | GG    | 67 | 6500±178 |       | 117 | 5568±137 |       |
|            |           | AG    | 29 | 6652±169 | 0.461 | 90  | 5440±126 | 0.562 |
|            |           | AA    | 7  | 6071±161 | 0.629 | 23  | 5378±138 | 0.558 |
|            |           | AA+AG | 36 | 6539±167 | 0.610 | 113 | 5427±128 | 0.488 |
|            |           | Trend |    |          | 0.838 |     |          | 0.467 |
| <i>BPI</i> | rs6127742 | GG    | 61 | 6552±187 |       | 153 | 5557±138 |       |
|            |           | AG    | 34 | 6312±131 | 0.348 | 67  | 5304±113 | 0.247 |
|            |           | AA    | 8  | 7075±232 | 0.459 | 10  | 5910±167 | 0.745 |
|            |           | AA+AG | 42 | 6457±155 | 0.740 | 77  | 5383±122 | 0.341 |
|            |           | Trend |    |          | 0.844 |     |          | 0.548 |
| <i>BPI</i> | rs5741806 | TT    | 26 | 6315±161 |       | 71  | 5665±160 |       |
|            |           | CT    | 57 | 6402±163 | 0.769 | 110 | 5504±120 | 0.538 |
|            |           | CC    | 20 | 7090±213 | 0.249 | 49  | 5247±113 | 0.193 |
|            |           | CC+CT | 77 | 6581±178 | 0.808 | 159 | 5425±118 | 0.346 |
|            |           | Trend |    |          | 0.292 |     |          | 0.203 |
| <i>BPI</i> | rs6024876 | AA    | 41 | 6951±202 |       | 94  | 5403±111 |       |
|            |           | AG    | 46 | 6041±135 | 0.012 | 106 | 5458±141 | 0.737 |
|            |           | GG    | 16 | 6750±172 | 0.868 | 29  | 5983±162 | 0.045 |
|            |           | GG+AG | 62 | 6224±147 | 0.058 | 135 | 5571±146 | 0.610 |
|            |           | Trend |    |          | 0.381 |     |          | 0.130 |
| <i>BPI</i> | rs5743533 | GG    | 74 | 6478±170 |       | 169 | 5457±123 |       |
|            |           | AG    | 22 | 6732±201 | 0.700 | 56  | 5673±162 | 0.568 |
|            |           | AA    | 7  | 6200±131 | 0.190 | 4   | 4725±670 | 0.049 |
|            |           | AA+AG | 29 | 6603±186 | 0.992 | 60  | 5610±159 | 0.751 |
|            |           | Trend |    |          | 0.657 |     |          | 0.990 |
| <i>BPI</i> | rs6127776 | TT    | 62 | 6553±188 |       | 122 | 5439±132 |       |
|            |           | CT    | 36 | 6408±155 | 0.613 | 92  | 5607±137 | 0.419 |
|            |           | CC    | 5  | 6780±124 | 0.526 | 16  | 5331±114 | 0.747 |
|            |           | CC+CT | 41 | 6454±151 | 0.725 | 108 | 5566±134 | 0.423 |
|            |           | Trend |    |          | 0.925 |     |          | 0.479 |
| <i>BPI</i> | rs2275954 | AA    | 39 | 6569±173 |       | 83  | 5623±138 |       |
|            |           | AG    | 43 | 6342±157 | 0.498 | 105 | 5442±128 | 0.507 |
|            |           | GG    | 21 | 6762±209 | 0.340 | 42  | 5395±135 | 0.742 |
|            |           | GG+AG | 64 | 6480±175 | 0.981 | 147 | 5429±130 | 0.525 |
|            |           | Trend |    |          | 0.512 |     |          | 0.654 |
| <i>BPI</i> | rs2425362 | AA    | 34 | 6412±195 |       | 66  | 5270±111 |       |
|            |           | AC    | 38 | 6624±181 | 0.820 | 116 | 5469±132 | 0.553 |
|            |           | CC    | 28 | 6396±145 | 0.599 | 47  | 5804±145 | 0.138 |
|            |           | CC+AC | 66 | 6527±166 | 0.924 | 163 | 5566±136 | 0.318 |
|            |           | Trend |    |          | 0.639 |     |          | 0.146 |
| <i>LBP</i> | rs7273717 | TT    | 37 | 6489±189 |       | 66  | 5270±111 |       |

|            |            |       |    |          |       |     |          |       |
|------------|------------|-------|----|----------|-------|-----|----------|-------|
|            |            | CT    | 49 | 6590±184 | 0.925 | 117 | 5505±137 | 0.486 |
|            |            | CC    | 17 | 6347±101 | 0.607 | 47  | 5804±145 | 0.143 |
|            |            | CC+CT | 66 | 6527±166 | 0.817 | 164 | 5591±140 | 0.284 |
|            |            | Trend |    |          | 0.677 |     |          | 0.147 |
| <i>LBP</i> | rs5741812  | AA    | 31 | 6374±151 |       | 65  | 5726±149 |       |
|            |            | AT    | 49 | 6714±191 | 0.361 | 126 | 5513±129 | 0.523 |
|            |            | TT    | 23 | 6274±166 | 0.795 | 39  | 5074±104 | 0.059 |
|            |            | TT+AT | 72 | 6574±183 | 0.451 | 165 | 5409±125 | 0.265 |
|            |            | Trend |    |          | 0.745 |     |          | 0.075 |
| <i>LBP</i> | rs1780617  | AA    | 39 | 6621±184 |       | 129 | 5399±132 |       |
|            |            | AG    | 26 | 6088±157 | 0.049 | 75  | 5537±129 | 0.713 |
|            |            | GG    | 26 | 6446±179 | 0.566 | 25  | 5728±122 | 0.755 |
|            |            | GG+AG | 52 | 6267±167 | 0.148 | 100 | 5585±127 | 0.678 |
|            |            | Trend |    |          | 0.455 |     |          | 0.682 |
| <i>LBP</i> | rs2232578  | AA    | 55 | 6815±182 |       | 134 | 5440±129 |       |
|            |            | AG    | 42 | 6169±154 | 0.008 | 82  | 5570±140 | 0.814 |
|            |            | GG    | 6  | 6167±204 | 0.710 | 14  | 5650±123 | 0.966 |
|            |            | GG+AG | 48 | 6169±159 | 0.014 | 96  | 5581±137 | 0.840 |
|            |            | Trend |    |          | 0.077 |     |          | 0.891 |
| <i>LBP</i> | rs1609800  | AA    | 78 | 6396±157 |       | 187 | 5543±134 |       |
|            |            | AT    | 24 | 6838±220 | 0.536 | 41  | 5246±116 | 0.339 |
|            |            | TT    | 1  | 7900     | 0.484 | 2   | 6550±289 | 0.282 |
|            |            | TT+AT | 25 | 6880±216 | 0.523 | 43  | 5307±125 | 0.517 |
|            |            | Trend |    |          | 0.505 |     |          | 0.768 |
| <i>LBP</i> | rs6014804  | GG    | 88 | 6583±172 |       | 203 | 5485±134 |       |
|            |            | CG    | 12 | 6133±177 | 0.371 | 25  | 5580±128 | 0.661 |
|            |            | CC    | 3  | 6000±249 | 0.863 | 2   | 5850±134 | 0.432 |
|            |            | CC+CG | 15 | 6107±183 | 0.391 | 27  | 5600±126 | 0.563 |
|            |            | Trend |    |          | 0.500 |     |          | 0.483 |
| <i>LBP</i> | rs11086565 | AA    | 88 | 6583±172 |       | 203 | 5485±134 |       |
|            |            | AG    | 12 | 6133±177 | 0.371 | 25  | 5580±128 | 0.661 |
|            |            | GG    | 3  | 6000±249 | 0.863 | 2   | 5850±134 | 0.432 |
|            |            | GG+AG | 15 | 6107±183 | 0.391 | 27  | 5600±126 | 0.563 |
|            |            | Trend |    |          | 0.500 |     |          | 0.483 |
| <i>LBP</i> | rs12624843 | AA    | 38 | 6508±151 |       | 99  | 5447±134 |       |
|            |            | AG    | 40 | 6423±198 | 0.476 | 107 | 5507±127 | 0.707 |
|            |            | GG    | 23 | 6709±176 | 0.827 | 23  | 5500±131 | 0.745 |
|            |            | GG+AG | 63 | 6527±189 | 0.529 | 130 | 5505±128 | 0.823 |
|            |            | Trend |    |          | 0.742 |     |          | 0.974 |
| <i>LBP</i> | rs1780624  | GG    | 70 | 6374±151 |       | 151 | 5447±131 |       |
|            |            | CG    | 30 | 6830±222 | 0.418 | 72  | 5554±134 | 0.650 |
|            |            | CC    | 3  | 6600±115 | 0.786 | 7   | 6043±149 | 0.402 |
|            |            | CC+CG | 33 | 6809±213 | 0.442 | 79  | 5597±135 | 0.550 |
|            |            | Trend |    |          | 0.487 |     |          | 0.453 |
| <i>LBP</i> | rs1780627  | CC    | 63 | 6444±170 |       | 156 | 5576±133 |       |
|            |            | CT    | 35 | 6637±188 | 0.949 | 63  | 5332±135 | 0.219 |
|            |            | TT    | 5  | 6520±138 | 0.788 | 10  | 5310±124 | 0.850 |
|            |            | TT+CT | 40 | 6623±181 | 0.996 | 73  | 5329±132 | 0.232 |
|            |            | Trend |    |          | 0.928 |     |          | 0.295 |

|             |            |       |     |          |       |     |          |       |
|-------------|------------|-------|-----|----------|-------|-----|----------|-------|
| <i>LBP</i>  | rs1780629  | TT    | 35  | 6486±179 |       | 75  | 5571±137 |       |
|             |            | CT    | 36  | 6578±175 | 0.929 | 88  | 5235±118 | 0.195 |
|             |            | CC    | 28  | 6504±178 | 0.888 | 65  | 5768±144 | 0.422 |
|             |            | CC+CT | 64  | 6545±175 | 0.977 | 153 | 5461±132 | 0.682 |
|             |            | Trend |     |          | 0.897 |     |          | 0.497 |
| <i>LBP</i>  | rs737091   | CC    | 90  | 6460±166 |       | 205 | 5488±130 |       |
|             |            | CT    | 10  | 6970±251 | 0.838 | 21  | 5500±155 | 0.948 |
|             |            | TT    |     |          |       | 3   | 6233±212 | 0.261 |
|             |            | TT+CT | 10  | 6970±251 | 0.838 | 24  | 5592±159 | 0.690 |
|             |            | Trend |     |          | 0.838 |     |          | 0.502 |
| <i>C1D</i>  | rs7582426  | AA    | 75  | 6340±168 |       | 189 | 5475±134 |       |
|             |            | AG    | 18  | 7150±208 | 0.356 | 38  | 5634±131 | 0.933 |
|             |            | GG    | 3   | 6500±153 | 0.949 | 2   | 5800±424 | 0.168 |
|             |            | GG+AG | 21  | 7057±199 | 0.376 | 40  | 5643±128 | 0.875 |
|             |            | Trend |     |          | 0.448 |     |          | 0.802 |
| <i>C1D</i>  | rs10496160 | GG    | 100 | 6523±171 |       | 224 | 5513±133 |       |
|             |            | CG    | 3   | 6200±306 | 0.460 | 6   | 4967±952 | 0.246 |
| <i>C1D</i>  | rs10203061 | AA    | 57  | 6602±180 |       | 101 | 5630±140 |       |
|             |            | AG    | 38  | 6321±154 | 0.472 | 103 | 5423±126 | 0.511 |
|             |            | GG    | 8   | 6800±225 | 0.652 | 26  | 5288±128 | 0.249 |
|             |            | GG+AG | 46  | 6404±166 | 0.683 | 129 | 5396±126 | 0.338 |
|             |            | Trend |     |          | 0.971 |     |          | 0.241 |
| <i>C1D</i>  | rs4671871  | GG    | 100 | 6523±176 |       | 213 | 5508±133 |       |
|             |            | AG    | 3   | 6200±173 | 0.739 | 16  | 5450±129 | 0.343 |
| <i>C1QA</i> | rs665691   | GG    | 48  | 6617±160 |       | 88  | 5685±134 |       |
|             |            | CG    | 42  | 6212±179 | 0.224 | 113 | 5325±128 | 0.054 |
|             |            | CC    | 13  | 7108±200 | 0.488 | 28  | 5657±143 | 0.793 |
|             |            | CC+CG | 55  | 6424±186 | 0.434 | 141 | 5391±131 | 0.095 |
|             |            | Trend |     |          | 0.986 |     |          | 0.314 |
| <i>C1QA</i> | rs2935542  | AA    | 68  | 6443±165 |       | 166 | 5496±133 |       |
|             |            | AG    | 29  | 6800±200 | 0.660 | 57  | 5474±123 | 0.658 |
|             |            | GG    | 6   | 5933±124 | 0.578 | 7   | 5771±202 | 0.820 |
|             |            | GG+AG | 35  | 6651±190 | 0.807 | 64  | 5506±132 | 0.632 |
|             |            | Trend |     |          | 0.973 |     |          | 0.651 |
| <i>C1QA</i> | rs6690827  | GG    | 31  | 6545±193 |       | 64  | 5350±141 |       |
|             |            | AG    | 51  | 6510±174 | 0.959 | 130 | 5623±128 | 0.151 |
|             |            | AA    | 21  | 6476±147 | 0.913 | 35  | 5343±132 | 0.941 |
|             |            | AA+AG | 72  | 6500±166 | 0.941 | 165 | 5564±129 | 0.238 |
|             |            | Trend |     |          | 0.914 |     |          | 0.657 |
| <i>C1QG</i> | rs12404537 | CC    | 99  | 6540±175 |       | 216 | 5481±133 |       |
|             |            | CT    | 4   | 5850±143 | 0.271 | 14  | 5779±124 | 0.221 |
| <i>C1QG</i> | rs672693   | GG    | 43  | 6647±178 |       | 75  | 5324±118 |       |
|             |            | AG    | 38  | 6479±171 | 0.958 | 111 | 5450±138 | 0.403 |
|             |            | AA    | 21  | 6319±180 | 0.945 | 42  | 5924±139 | 0.020 |
|             |            | AA+AG | 59  | 6422±173 | 0.985 | 153 | 5580±140 | 0.139 |
|             |            | Trend |     |          | 0.970 |     |          | 0.025 |
| <i>C1QG</i> | rs17433222 | GG    | 65  | 6578±176 |       | 156 | 5446±135 |       |
|             |            | AG    | 37  | 6419±173 | 0.967 | 64  | 5591±135 | 0.482 |
|             |            | AA    | 1   | 5800     | 0.964 | 9   | 5889±747 | 0.181 |

|              |            |       |    |          |       |     |          |        |
|--------------|------------|-------|----|----------|-------|-----|----------|--------|
|              |            | AA+AG | 38 | 6403±170 | 0.969 | 73  | 5627±129 | 0.359  |
|              |            | Trend |    |          | 0.972 |     |          | 0.255  |
| <i>C1QG</i>  | rs291989   | CC    | 54 | 6531±157 |       | 104 | 5798±150 |        |
|              |            | CT    | 39 | 6367±200 | 0.785 | 95  | 5219±108 | <0.001 |
|              |            | TT    | 10 | 6990±160 | 0.578 | 31  | 5352±122 | 0.100  |
|              |            | TT+CT | 49 | 6494±192 | 0.925 | 126 | 5252±111 | 0.001  |
|              |            | Trend |    |          | 0.861 |     |          | 0.009  |
| <i>C1QG</i>  | rs12756603 | AA    | 57 | 6560±185 |       | 133 | 5456±124 |        |
|              |            | AG    | 27 | 6422±172 | 0.560 | 89  | 5620±146 | 0.322  |
|              |            | GG    | 19 | 6505±147 | 0.226 | 8   | 4850±943 | 0.377  |
|              |            | GG+AG | 46 | 6457±161 | 0.311 | 97  | 5557±144 | 0.415  |
|              |            | Trend |    |          | 0.223 |     |          | 0.633  |
| <i>C1QB</i>  | rs631090   | TT    | 52 | 6263±165 |       | 124 | 5356±121 |        |
|              |            | CT    | 45 | 6900±187 | 0.056 | 87  | 5703±138 | 0.066  |
|              |            | CC    | 6  | 5783±736 | 0.954 | 19  | 5495±173 | 0.733  |
|              |            | CC+CT | 51 | 6769±180 | 0.074 | 106 | 5666±144 | 0.087  |
|              |            | Trend |    |          | 0.153 |     |          | 0.234  |
| <i>C1QB</i>  | rs629409   | CC    | 51 | 6380±159 |       | 117 | 5329±122 |        |
|              |            | CT    | 45 | 6807±194 | 0.272 | 97  | 5753±132 | 0.008  |
|              |            | TT    | 7  | 5600±829 | 0.343 | 16  | 5200±186 | 0.612  |
|              |            | TT+CT | 52 | 6644±187 | 0.399 | 113 | 5674±141 | 0.036  |
|              |            | Trend |    |          | 0.775 |     |          | 0.334  |
| <i>C1QB</i>  | rs12088436 | CC    | 98 | 6584±174 |       | 207 | 5485±135 |        |
|              |            | AC    | 5  | 5140±896 | 0.012 | 22  | 5727±105 | 0.148  |
|              |            | AA    |    |          |       | 1   | 3300     | <0.001 |
|              |            | AA+AC | 5  | 5140±896 | 0.012 | 23  | 5622±114 | 0.420  |
|              |            | Trend |    |          | 0.012 |     |          | 0.799  |
| <i>C1QBP</i> | rs2285747  | CC    | 50 | 6584±162 |       | 152 | 5566±136 |        |
|              |            | CG    | 43 | 6291±184 | 0.192 | 69  | 5333±127 | 0.209  |
|              |            | GG    | 10 | 7120±187 | 0.519 | 9   | 5622±116 | 0.591  |
|              |            | GG+CG | 53 | 6447±186 | 0.367 | 78  | 5367±125 | 0.308  |
|              |            | Trend |    |          | 0.805 |     |          | 0.505  |
| <i>C1QBP</i> | rs2472614  | CC    | 42 | 6710±155 |       | 103 | 5440±122 |        |
|              |            | CG    | 43 | 6512±198 | 0.432 | 105 | 5528±144 | 0.647  |
|              |            | GG    | 18 | 6061±150 | 0.087 | 22  | 5636±125 | 0.637  |
|              |            | GG+CG | 61 | 6379±185 | 0.206 | 127 | 5546±141 | 0.592  |
|              |            | Trend |    |          | 0.093 |     |          | 0.567  |
| <i>DHX33</i> | rs3744711  | AA    | 60 | 6530±166 |       | 160 | 5509±134 |        |
|              |            | AG    | 36 | 6522±189 | 0.567 | 64  | 5492±131 | 0.953  |
|              |            | GG    | 7  | 6329±182 | 0.761 | 6   | 5283±126 | 0.692  |
|              |            | GG+AG | 43 | 6491±186 | 0.546 | 70  | 5474±130 | 0.894  |
|              |            | Trend |    |          | 0.564 |     |          | 0.827  |
| <i>DHX33</i> | rs2074437  | TT    | 61 | 6498±166 |       | 165 | 5544±137 |        |
|              |            | CT    | 34 | 6541±190 | 0.629 | 58  | 5409±121 | 0.678  |
|              |            | CC    | 7  | 6329±182 | 0.777 | 6   | 5283±126 | 0.650  |
|              |            | CC+CT | 41 | 6505±187 | 0.603 | 64  | 5397±120 | 0.624  |
|              |            | Trend |    |          | 0.615 |     |          | 0.582  |
| <i>C1QR1</i> | rs17682491 | CC    | 66 | 6412±167 |       | 152 | 5455±133 |        |
|              |            | CT    | 33 | 6712±192 | 0.254 | 68  | 5604±140 | 0.222  |

|       |           |       |    |          |        |     |          |        |
|-------|-----------|-------|----|----------|--------|-----|----------|--------|
|       |           | TT    | 4  | 6550±152 | 0.977  | 10  | 5440±802 | 0.969  |
|       |           | TT+CT | 37 | 6695±186 | 0.275  | 78  | 5583±133 | 0.255  |
|       |           | Trend |    |          | 0.352  |     |          | 0.334  |
| C1QR1 | rs2749817 | CC    | 34 | 6785±180 |        | 88  | 5519±131 |        |
|       |           | CT    | 53 | 6334±171 | 0.398  | 104 | 5476±146 | 0.796  |
|       |           | TT    | 16 | 6531±172 | 0.704  | 36  | 5536±948 | 0.592  |
|       |           | TT+CT | 69 | 6380±170 | 0.416  | 140 | 5491±134 | 0.954  |
|       |           | Trend |    |          | 0.558  |     |          | 0.776  |
| C1QR1 | rs7492    | GG    | 97 | 6563±177 |        | 207 | 5513±133 |        |
|       |           | AG    | 6  | 5717±906 | 0.175  | 21  | 5390±130 | 0.818  |
|       |           | AA    |    |          |        | 1   | 6100     | 0.589  |
|       |           | AA+AG | 6  | 5717±906 | 0.175  | 22  | 5423±128 | 0.837  |
|       |           | Trend |    |          | 0.175  |     |          | 0.857  |
| C1QR1 | rs2749812 | GG    | 90 | 6574±180 |        | 204 | 5504±132 |        |
|       |           | AG    | 13 | 6092±121 | 0.048  | 24  | 5479±142 | 0.950  |
|       |           | AA    |    |          |        | 1   | 6100     | 0.584  |
|       |           | AA+AG | 13 | 6092±121 | 0.048  | 25  | 5504±140 | 0.968  |
|       |           | Trend |    |          | 0.048  |     |          | 0.986  |
| C1QR1 | rs3746732 | GG    | 72 | 6496±183 |        | 158 | 5519±141 |        |
|       |           | AG    | 30 | 6640±148 | 0.420  | 55  | 5404±117 | 0.912  |
|       |           | AA    | 1  | 4000     | 0.002  | 16  | 5700±101 | 0.110  |
|       |           | AA+AG | 31 | 6555±153 | 0.575  | 71  | 5470±113 | 0.666  |
|       |           | Trend |    |          | 0.787  |     |          | 0.360  |
| C1QR1 | rs6048546 | GG    | 88 | 6626±180 |        | 194 | 5470±133 |        |
|       |           | AG    | 15 | 5853±114 | 0.157  | 35  | 5703±132 | 0.180  |
|       |           | AA    |    |          |        | 1   | 3900     | <0.001 |
|       |           | AA+AG | 15 | 5853±114 | 0.157  | 36  | 5653±134 | 0.286  |
|       |           | Trend |    |          | 0.157  |     |          | 0.481  |
| C1QR1 | rs1884655 | AA    | 70 | 6307±179 |        | 125 | 5458±143 |        |
|       |           | AG    | 28 | 6821±152 | 0.088  | 92  | 5505±118 | 0.661  |
|       |           | GG    | 5  | 7680±160 | 0.016  | 12  | 5925±137 | 0.175  |
|       |           | GG+AG | 33 | 6952±154 | 0.026  | 104 | 5554±120 | 0.492  |
|       |           | Trend |    |          | 0.009  |     |          | 0.320  |
| C1RL  | rs3813729 | CC    | 40 | 6313±164 |        | 103 | 5637±132 |        |
|       |           | CT    | 55 | 6615±187 | 0.426  | 100 | 5462±138 | 0.105  |
|       |           | TT    | 8  | 6825±126 | 0.493  | 26  | 5077±110 | 0.090  |
|       |           | TT+CT | 63 | 6641±180 | 0.401  | 126 | 5383±133 | 0.062  |
|       |           | Trend |    |          | 0.383  |     |          | 0.047  |
| C1RL  | rs1801046 | GG    | 38 | 6753±188 |        | 85  | 5406±130 |        |
|       |           | AG    | 52 | 6394±164 | 0.499  | 110 | 5520±139 | 0.574  |
|       |           | AA    | 13 | 6292±172 | 0.274  | 35  | 5657±121 | 0.187  |
|       |           | AA+AG | 65 | 6374±165 | 0.374  | 145 | 5553±134 | 0.365  |
|       |           | Trend |    |          | 0.275  |     |          | 0.206  |
| C1RL  | rs7135975 | AA    | 75 | 6567±172 |        | 154 | 5571±140 |        |
|       |           | AG    | 27 | 6459±178 | 0.486  | 72  | 5319±116 | 0.165  |
|       |           | GG    | 1  | 4000     | <0.001 | 4   | 5925±133 | 0.831  |
|       |           | GG+AG | 28 | 6371±181 | 0.369  | 76  | 5351±117 | 0.188  |
|       |           | Trend |    |          | 0.236  |     |          | 0.259  |
| C1RL  | rs3782928 | CC    | 75 | 6567±172 |        | 154 | 5569±139 |        |



|      |            |       |     |          |        |     |          |       |
|------|------------|-------|-----|----------|--------|-----|----------|-------|
|      |            | CT    | 27  | 6459±178 | 0.486  | 72  | 5325±118 | 0.251 |
|      |            | TT    | 1   | 4000     | <0.001 | 4   | 5925±133 | 0.787 |
|      |            | TT+CT | 28  | 6371±181 | 0.369  | 76  | 5357±119 | 0.282 |
|      |            | Trend |     |          | 0.236  |     |          | 0.366 |
| C1RL | rs3742089  | TT    | 42  | 6379±175 |        | 113 | 5542±128 |       |
|      |            | CT    | 42  | 6779±173 | 0.338  | 97  | 5396±132 | 0.438 |
|      |            | CC    | 18  | 6306±175 | 0.701  | 17  | 5600±135 | 0.961 |
|      |            | CC+CT | 60  | 6637±174 | 0.559  | 114 | 5426±132 | 0.483 |
|      |            | Trend |     |          | 0.961  |     |          | 0.628 |
| C1RL | rs11613834 | GG    | 101 | 6482±174 |        | 225 | 5494±133 |       |
|      |            | AG    | 2   | 8100±424 | <0.001 | 5   | 5700±970 | 0.692 |
| C1RL | rs17198395 | CC    | 79  | 6466±172 |        | 178 | 5448±124 |       |
|      |            | CT    | 22  | 6727±183 | 0.246  | 47  | 5813±161 | 0.162 |
|      |            | TT    | 2   | 6050±247 | 0.728  | 4   | 4375±640 | 0.016 |
|      |            | TT+CT | 24  | 6671±183 | 0.321  | 51  | 5700±160 | 0.323 |
|      |            | Trend |     |          | 0.484  |     |          | 0.616 |
| C1RL | rs11043785 | TT    | 19  | 6874±187 |        | 77  | 5508±127 |       |
|      |            | CT    | 63  | 6478±175 | 0.528  | 109 | 5517±142 | 0.816 |
|      |            | CC    | 21  | 6295±161 | 0.307  | 44  | 5436±119 | 0.846 |
|      |            | CC+CT | 84  | 6432±171 | 0.427  | 153 | 5494±136 | 0.912 |
|      |            | Trend |     |          | 0.306  |     |          | 0.909 |
| C1RL | rs744141   | CC    | 56  | 6270±172 |        | 114 | 5411±133 |       |
|      |            | CG    | 42  | 6767±176 | 0.149  | 101 | 5678±136 | 0.380 |
|      |            | GG    | 5   | 7120±165 | 0.248  | 15  | 4960±874 | 0.491 |
|      |            | GG+CG | 47  | 6804±173 | 0.103  | 116 | 5585±133 | 0.506 |
|      |            | Trend |     |          | 0.087  |     |          | 0.753 |
| C1RL | rs3782924  | CC    | 76  | 6499±171 |        | 155 | 5566±139 |       |
|      |            | CT    | 26  | 6654±180 | 0.772  | 71  | 5328±117 | 0.254 |
|      |            | TT    | 1   | 4000     | <0.001 | 4   | 5925±133 | 0.797 |
|      |            | TT+CT | 27  | 6556±184 | 0.603  | 75  | 5360±117 | 0.284 |
|      |            | Trend |     |          | 0.408  |     |          | 0.368 |
| C1RL | rs10845008 | CC    | 19  | 7153±177 |        | 71  | 5493±129 |       |
|      |            | CT    | 66  | 6479±173 | 0.245  | 110 | 5603±143 | 0.659 |
|      |            | TT    | 18  | 5967±159 | 0.024  | 49  | 5273±112 | 0.363 |
|      |            | TT+CT | 84  | 6369±171 | 0.099  | 159 | 5501±135 | 0.975 |
|      |            | Trend |     |          | 0.024  |     |          | 0.442 |
| C1S  | rs3919533  | TT    | 89  | 6513±182 |        | 193 | 5545±134 |       |
|      |            | CT    | 14  | 6514±106 | 0.481  | 36  | 5256±123 | 0.457 |
|      |            | CC    |     |          |        | 1   | 5400     | 0.063 |
|      |            | CC+CT | 14  | 6514±106 | 0.481  | 37  | 5259±122 | 0.492 |
|      |            | Trend |     |          | 0.481  |     |          | 0.539 |
| C1S  | rs11064497 | CC    | 89  | 6513±182 |        | 197 | 5549±135 |       |
|      |            | CT    | 14  | 6514±106 | 0.481  | 32  | 5191±117 | 0.320 |
|      |            | TT    |     |          |        | 1   | 5400     | 0.064 |
|      |            | TT+CT | 14  | 6514±106 | 0.481  | 33  | 5197±116 | 0.357 |
|      |            | Trend |     |          | 0.481  |     |          | 0.408 |
| C1S  | rs7968584  | CC    | 83  | 6522±173 |        | 184 | 5576±137 |       |
|      |            | CT    | 20  | 6480±182 | 0.997  | 44  | 5182±110 | 0.068 |
|      |            | TT    |     |          |        | 2   | 5350±71  | 0.349 |

|              |           |       |     |          |        |     |          |        |
|--------------|-----------|-------|-----|----------|--------|-----|----------|--------|
|              |           | TT+CT | 20  | 6480±182 | 0.997  | 46  | 5189±107 | 0.080  |
|              |           | Trend |     |          | 0.997  |     |          | 0.107  |
| <i>C1S</i>   | rs7183    | GG    | 86  | 6564±182 |        | 190 | 5571±135 |        |
|              |           | GT    | 16  | 6306±127 | 0.765  | 38  | 5145±117 | 0.106  |
|              |           | TT    | 1   | 5500     | <0.001 | 2   | 5350±71  | 0.332  |
|              |           | TT+GT | 17  | 6259±125 | 0.634  | 40  | 5155±114 | 0.122  |
|              |           | Trend |     |          | 0.503  |     |          | 0.157  |
| <i>C2</i>    | rs3130683 | TT    | 92  | 6561±174 |        | 214 | 5476±134 |        |
|              |           | CT    | 11  | 6118±176 | 0.611  | 16  | 5800±120 | 0.221  |
| <i>C2</i>    | rs9267677 | TT    | 76  | 6574±188 |        | 186 | 5515±134 |        |
|              |           | CT    | 25  | 6232±118 | 0.192  | 37  | 5408±116 | 0.601  |
|              |           | CC    | 2   | 7750±148 | 0.015  | 6   | 5517±216 | 0.994  |
|              |           | CC+CT | 27  | 6344±124 | 0.334  | 43  | 5423±131 | 0.642  |
|              |           | Trend |     |          | 0.588  |     |          | 0.735  |
| <i>C2</i>    | rs2734335 | AA    | 28  | 6314±196 |        | 111 | 5387±137 |        |
|              |           | AG    | 31  | 6419±155 | 0.688  | 98  | 5623±126 | 0.108  |
|              |           | GG    | 24  | 6204±159 | 0.889  | 18  | 5622±148 | 0.509  |
|              |           | GG+AG | 55  | 6325±156 | 0.846  | 116 | 5623±129 | 0.111  |
|              |           | Trend |     |          | 0.878  |     |          | 0.167  |
| <i>C2</i>    | rs7746553 | CC    | 70  | 6629±186 |        | 163 | 5485±136 |        |
|              |           | CG    | 31  | 6174±139 | 0.229  | 61  | 5508±115 | 0.583  |
|              |           | GG    | 2   | 7750±148 | 0.021  | 6   | 5783±222 | 0.767  |
|              |           | GG+CG | 33  | 6270±142 | 0.345  | 67  | 5533±125 | 0.545  |
|              |           | Trend |     |          | 0.556  |     |          | 0.563  |
| <i>C2</i>    | rs9332739 | GG    | 102 | 6529±174 |        | 211 | 5527±133 |        |
|              |           | CG    | 1   | 4900     | 0.022  | 16  | 5369±124 | 0.132  |
|              |           | CC    |     |          |        | 1   | 3900     | <0.001 |
|              |           | CC+CG | 1   | 4900     | 0.022  | 17  | 5282±125 | 0.068  |
|              |           | Trend |     |          | 0.022  |     |          | 0.030  |
| <i>C2</i>    | rs609061  | GG    | 97  | 6435±168 |        | 210 | 5490±133 |        |
|              |           | AG    | 6   | 7783±223 | 0.042  | 20  | 5590±131 | 0.190  |
| <i>BF</i>    | rs1048709 | GG    | 51  | 6757±162 |        | 123 | 5499±135 |        |
|              |           | AG    | 40  | 6318±171 | 0.263  | 83  | 5366±114 | 0.930  |
|              |           | AA    | 12  | 6133±226 | 0.305  | 24  | 5954±173 | 0.219  |
|              |           | AA+AG | 52  | 6275±183 | 0.176  | 107 | 5498±131 | 0.661  |
|              |           | Trend |     |          | 0.194  |     |          | 0.361  |
| <i>BF</i>    | rs537160  | GG    | 37  | 6459±151 |        | 82  | 5544±141 |        |
|              |           | AG    | 49  | 6706±179 | 0.350  | 109 | 5462±121 | 0.840  |
|              |           | AA    | 16  | 6188±207 | 0.869  | 38  | 5537±148 | 0.906  |
|              |           | AA+AG | 65  | 6578±186 | 0.514  | 147 | 5482±128 | 0.842  |
|              |           | Trend |     |          | 0.939  |     |          | 0.875  |
| <i>BF</i>    | rs4151657 | TT    | 50  | 6508±175 |        | 100 | 5468±134 |        |
|              |           | CT    | 46  | 6607±177 | 0.820  | 114 | 5539±129 | 0.747  |
|              |           | CC    | 7   | 5943±152 | 0.254  | 15  | 5473±158 | 0.969  |
|              |           | CC+CT | 53  | 6519±174 | 0.983  | 129 | 5532±132 | 0.763  |
|              |           | Trend |     |          | 0.665  |     |          | 0.826  |
| <i>STK19</i> | rs389883  | TT    | 48  | 6665±158 |        | 102 | 5469±127 |        |
|              |           | GT    | 38  | 6366±149 | 0.517  | 99  | 5611±140 | 0.322  |
|              |           | GG    | 17  | 6418±257 | 0.402  | 27  | 5230±127 | 0.679  |

|       |            |       |    |          |        |     |          |        |
|-------|------------|-------|----|----------|--------|-----|----------|--------|
|       |            | GG+GT | 55 | 6382±187 | 0.353  | 126 | 5529±138 | 0.498  |
|       |            | Trend |    |          | 0.355  |     |          | 0.901  |
| STK19 | rs389512   | GG    | 73 | 6360±177 |        | 182 | 5481±134 |        |
|       |            | CG    | 28 | 6793±154 | 0.320  | 45  | 5587±132 | 0.188  |
|       |            | CC    | 2  | 8200±297 | 0.126  | 1   | 5500     | 0.170  |
|       |            | CC+CG | 30 | 6887±162 | 0.194  | 46  | 5585±131 | 0.203  |
|       |            | Trend |    |          | 0.119  |     |          | 0.226  |
| C3    | rs379527   | AA    | 49 | 6706±169 |        | 106 | 5487±123 |        |
|       |            | AC    | 43 | 6440±185 | 0.340  | 96  | 5556±137 | 0.840  |
|       |            | CC    | 11 | 5945±145 | 0.201  | 27  | 5385±158 | 0.219  |
|       |            | CC+AC | 54 | 6339±178 | 0.227  | 123 | 5519±141 | 0.749  |
|       |            | Trend |    |          | 0.154  |     |          | 0.367  |
| C3    | rs2277984  | TT    | 31 | 6790±175 |        | 60  | 5503±127 |        |
|       |            | CT    | 50 | 6408±170 | 0.237  | 112 | 5536±122 | 0.606  |
|       |            | CC    | 22 | 6364±183 | 0.404  | 58  | 5422±158 | 0.666  |
|       |            | CC+CT | 72 | 6394±173 | 0.238  | 170 | 5497±135 | 0.870  |
|       |            | Trend |    |          | 0.368  |     |          | 0.663  |
| C3    | rs344550   | GG    | 42 | 6802±175 |        | 97  | 5458±120 |        |
|       |            | CG    | 51 | 6414±181 | 0.326  | 105 | 5596±135 | 0.845  |
|       |            | CC    | 10 | 5810±107 | 0.112  | 28  | 5275±166 | 0.241  |
|       |            | CC+CG | 61 | 6315±171 | 0.223  | 133 | 5529±142 | 0.791  |
|       |            | Trend |    |          | 0.125  |     |          | 0.403  |
| C3    | rs1389623  | GG    | 83 | 6408±164 |        | 168 | 5510±133 |        |
|       |            | AG    | 19 | 6932±213 | 0.576  | 59  | 5495±135 | 0.466  |
|       |            | AA    | 1  | 7300     | 0.003  | 3   | 4967±208 | 0.019  |
|       |            | AA+AG | 20 | 6950±207 | 0.520  | 62  | 5469±132 | 0.536  |
|       |            | Trend |    |          | 0.457  |     |          | 0.645  |
| C3    | rs2241393  | CC    | 42 | 6707±195 |        | 94  | 5527±122 |        |
|       |            | CG    | 46 | 6565±166 | 0.762  | 103 | 5509±138 | 0.632  |
|       |            | GG    | 15 | 5813±115 | 0.041  | 33  | 5388±147 | 0.241  |
|       |            | GG+CG | 61 | 6380±158 | 0.432  | 136 | 5479±140 | 0.408  |
|       |            | Trend |    |          | 0.126  |     |          | 0.253  |
| C3    | rs344548   | CC    | 94 | 6486±166 |        | 204 | 5497±138 |        |
|       |            | CG    | 9  | 6800±251 | 0.954  | 24  | 5475±826 | 0.740  |
|       |            | GG    |    |          |        | 2   | 6000±113 | 0.228  |
|       |            | GG+CG | 9  | 6800±251 | 0.954  | 26  | 5515±837 | 0.532  |
|       |            | Trend |    |          | 0.954  |     |          | 0.394  |
| C3    | rs11569523 | CC    | 66 | 6517±177 |        | 143 | 5369±118 |        |
|       |            | CT    | 33 | 6630±174 | 0.784  | 69  | 5751±152 | 0.312  |
|       |            | TT    | 4  | 5500±931 | 0.053  | 18  | 5567±156 | 0.902  |
|       |            | TT+CT | 37 | 6508±170 | 0.987  | 87  | 5713±152 | 0.355  |
|       |            | Trend |    |          | 0.651  |     |          | 0.508  |
| C3    | rs11569521 | GG    | 85 | 6391±175 |        | 199 | 5543±137 |        |
|       |            | CG    | 17 | 7271±146 | 0.020  | 29  | 5238±102 | 0.329  |
|       |            | CC    | 1  | 4100     | <0.001 | 2   | 4850±71  | <0.001 |
|       |            | CC+CG | 18 | 7094±160 | 0.060  | 31  | 5213±994 | 0.256  |
|       |            | Trend |    |          | 0.263  |     |          | 0.183  |
| C3    | rs3745568  | TT    | 87 | 6552±173 |        | 201 | 5489±133 |        |
|       |            | GT    | 16 | 6306±182 | 0.981  | 29  | 5566±133 | 0.803  |

|        |            |       |    |          |       |     |          |       |
|--------|------------|-------|----|----------|-------|-----|----------|-------|
| C3     | rs423490   | GG    | 88 | 6540±172 |       | 200 | 5494±133 |       |
|        |            | AG    | 15 | 6360±187 | 0.864 | 30  | 5533±132 | 0.900 |
| C3     | rs366510   | TT    | 74 | 6426±170 |       | 175 | 5534±136 |       |
|        |            | GT    | 26 | 6869±186 | 0.188 | 52  | 5392±124 | 0.579 |
|        |            | GG    | 3  | 5600±132 | 0.437 | 3   | 5267±723 | 0.524 |
|        |            | GG+GT | 29 | 6738±183 | 0.259 | 55  | 5385±122 | 0.548 |
|        |            | Trend |    |          | 0.427 |     |          | 0.513 |
| C3     | rs11569450 | GG    | 48 | 6585±173 |       | 85  | 5426±114 |       |
|        |            | CG    | 42 | 6657±185 | 0.755 | 108 | 5522±146 | 0.867 |
|        |            | CC    | 13 | 5785±127 | 0.020 | 36  | 5633±134 | 0.479 |
|        |            | CC+CG | 55 | 6451±176 | 0.694 | 144 | 5550±143 | 0.925 |
|        |            | Trend |    |          | 0.160 |     |          | 0.610 |
| C3     | rs11672613 | TT    | 43 | 6467±165 |       | 70  | 5343±119 |       |
|        |            | CT    | 42 | 6805±193 | 0.379 | 114 | 5592±141 | 0.523 |
|        |            | CC    | 18 | 5944±135 | 0.090 | 45  | 5531±130 | 0.481 |
|        |            | CC+CT | 60 | 6547±181 | 0.912 | 159 | 5575±138 | 0.454 |
|        |            | Trend |    |          | 0.312 |     |          | 0.447 |
| C3     | rs2230205  | CC    | 28 | 6718±184 |       | 52  | 5623±121 |       |
|        |            | CT    | 52 | 6512±174 | 0.973 | 128 | 5425±133 | 0.575 |
|        |            | TT    | 23 | 6270±163 | 0.541 | 49  | 5584±143 | 0.721 |
|        |            | TT+CT | 75 | 6437±170 | 0.839 | 177 | 5469±136 | 0.757 |
|        |            | Trend |    |          | 0.561 |     |          | 0.746 |
| C3     | rs2250656  | TT    | 63 | 6371±160 |       | 149 | 5499±138 |       |
|        |            | CT    | 37 | 6638±190 | 0.755 | 75  | 5532±127 | 0.503 |
|        |            | CC    | 3  | 7967±225 | 0.062 | 6   | 5083±371 | 0.017 |
|        |            | CC+CT | 40 | 6738±193 | 0.498 | 81  | 5499±123 | 0.395 |
|        |            | Trend |    |          | 0.266 |     |          | 0.265 |
| C3     | rs163913   | TT    | 29 | 6372±193 |       | 102 | 5473±134 |       |
|        |            | CT    | 50 | 6488±153 | 0.905 | 101 | 5494±127 | 0.703 |
|        |            | CC    | 21 | 6810±202 | 0.736 | 25  | 5660±156 | 0.509 |
|        |            | CC+CT | 71 | 6583±168 | 0.841 | 126 | 5527±133 | 0.570 |
|        |            | Trend |    |          | 0.744 |     |          | 0.491 |
| GPR108 | rs171094   | AA    | 35 | 6743±182 |       | 78  | 5533±146 |       |
|        |            | AG    | 50 | 6202±150 | 0.073 | 109 | 5498±119 | 0.685 |
|        |            | GG    | 18 | 6933±210 | 0.790 | 42  | 5464±143 | 0.736 |
|        |            | GG+AG | 68 | 6396±170 | 0.136 | 151 | 5489±126 | 0.658 |
|        |            | Trend |    |          | 0.521 |     |          | 0.703 |
| C4BPB  | rs4142863  | TT    | 60 | 6840±175 |       | 146 | 5539±140 |       |
|        |            | CT    | 37 | 6176±166 | 0.181 | 73  | 5488±121 | 0.612 |
|        |            | CC    | 6  | 5333±126 | 0.047 | 11  | 5036±103 | 0.035 |
|        |            | CC+CT | 43 | 6058±163 | 0.072 | 84  | 5429±119 | 0.367 |
|        |            | Trend |    |          | 0.033 |     |          | 0.179 |
| C4BPB  | rs2842754  | TT    | 91 | 6597±172 |       | 201 | 5532±134 |       |
|        |            | CT    | 10 | 5350±103 | 0.071 | 29  | 5266±119 | 0.165 |
|        |            | CC    | 2  | 8550±289 | 0.123 |     |          |       |
|        |            | CC+CT | 12 | 5883±178 | 0.453 | 29  | 5266±119 | 0.165 |
|        |            | Trend |    |          | 0.959 |     |          | 0.165 |
| C4BPB  | rs2808467  | GG    | 60 | 6515±171 |       | 145 | 5540±140 |       |
|        |            | GT    | 37 | 6481±180 | 0.789 | 76  | 5508±122 | 0.660 |

|              |            |       |    |          |       |     |          |       |
|--------------|------------|-------|----|----------|-------|-----|----------|-------|
|              |            | TT    | 6  | 6700±196 | 0.614 | 9   | 4756±686 | 0.004 |
|              |            | TT+GT | 43 | 6512±180 | 0.716 | 85  | 5428±119 | 0.419 |
|              |            | Trend |    |          | 0.637 |     |          | 0.198 |
| <i>C4BPB</i> | rs12063780 | CC    | 60 | 6515±171 |       | 146 | 5549±140 |       |
|              |            | CG    | 38 | 6589±189 | 0.631 | 75  | 5491±122 | 0.546 |
|              |            | GG    | 5  | 5920±492 | 0.469 | 9   | 4756±686 | 0.003 |
|              |            | GG+CG | 43 | 6512±180 | 0.716 | 84  | 5412±119 | 0.330 |
|              |            | Trend |    |          | 0.887 |     |          | 0.147 |
| <i>C4BPA</i> | rs17020993 | AA    | 59 | 6520±172 |       | 147 | 5539±139 |       |
|              |            | AG    | 34 | 6368±183 | 0.883 | 74  | 5508±123 | 0.625 |
|              |            | GG    | 8  | 6688±166 | 0.642 | 9   | 4756±686 | 0.003 |
|              |            | GG+AG | 42 | 6429±178 | 0.802 | 83  | 5427±120 | 0.390 |
|              |            | Trend |    |          | 0.709 |     |          | 0.181 |
| <i>C4BPA</i> | rs2842704  | AA    | 62 | 6660±162 |       | 110 | 5565±138 |       |
|              |            | AG    | 33 | 6218±191 | 0.141 | 100 | 5419±113 | 0.218 |
|              |            | GG    | 8  | 6600±191 | 0.849 | 19  | 5521±193 | 0.468 |
|              |            | GG+AG | 41 | 6293±189 | 0.184 | 119 | 5435±128 | 0.193 |
|              |            | Trend |    |          | 0.343 |     |          | 0.227 |
| <i>C4BPA</i> | rs4259650  | GG    | 57 | 6653±155 |       | 112 | 5538±139 |       |
|              |            | AG    | 39 | 6287±195 | 0.110 | 103 | 5411±113 | 0.238 |
|              |            | AA    | 7  | 6643±199 | 0.706 | 15  | 5813±202 | 0.802 |
|              |            | AA+AG | 46 | 6341±194 | 0.126 | 118 | 5462±127 | 0.323 |
|              |            | Trend |    |          | 0.231 |     |          | 0.560 |
| <i>C4BPA</i> | rs4425986  | TT    | 44 | 6691±150 |       | 89  | 5500±137 |       |
|              |            | CT    | 47 | 6360±186 | 0.131 | 116 | 5447±120 | 0.360 |
|              |            | CC    | 12 | 6467±213 | 0.382 | 25  | 5736±170 | 0.660 |
|              |            | CC+CT | 59 | 6381±190 | 0.113 | 141 | 5498±130 | 0.532 |
|              |            | Trend |    |          | 0.189 |     |          | 0.941 |
| <i>C4BPA</i> | rs2842707  | CC    | 37 | 6532±180 |       | 81  | 5441±139 |       |
|              |            | CG    | 31 | 6255±194 | 0.753 | 99  | 5397±114 | 0.737 |
|              |            | GG    | 34 | 6662±146 | 0.706 | 49  | 5794±155 | 0.517 |
|              |            | GG+CG | 65 | 6468±171 | 0.957 | 148 | 5528±130 | 0.972 |
|              |            | Trend |    |          | 0.736 |     |          | 0.616 |
| <i>C4BPA</i> | rs1126618  | CC    | 81 | 6470±179 |       | 181 | 5502±133 |       |
|              |            | CT    | 17 | 6547±166 | 0.279 | 46  | 5433±132 | 0.516 |
|              |            | TT    | 5  | 7100±119 | 0.019 | 3   | 6333±127 | 0.224 |
|              |            | TT+CT | 22 | 6673±156 | 0.104 | 49  | 5488±133 | 0.665 |
|              |            | Trend |    |          | 0.038 |     |          | 0.873 |
| <i>C4BPA</i> | rs2491393  | AA    | 52 | 6646±157 |       | 104 | 5463±130 |       |
|              |            | AG    | 30 | 6293±198 | 0.158 | 106 | 5582±140 | 0.478 |
|              |            | GG    | 21 | 6500±182 | 0.209 | 19  | 5211±107 | 0.547 |
|              |            | GG+AG | 51 | 6378±190 | 0.098 | 125 | 5526±136 | 0.671 |
|              |            | Trend |    |          | 0.134 |     |          | 0.969 |
| <i>C4BPA</i> | rs12087872 | AA    | 47 | 6613±163 |       | 104 | 5463±130 |       |
|              |            | AG    | 31 | 6255±185 | 0.185 | 106 | 5582±140 | 0.478 |
|              |            | GG    | 23 | 6570±189 | 0.259 | 19  | 5211±107 | 0.547 |
|              |            | GG+AG | 54 | 6389±186 | 0.139 | 125 | 5526±136 | 0.671 |
|              |            | Trend |    |          | 0.195 |     |          | 0.969 |
| <i>C5</i>    | rs7026551  | AA    | 63 | 6619±151 |       | 142 | 5518±138 |       |

|      |            |       |    |          |       |     |          |       |
|------|------------|-------|----|----------|-------|-----|----------|-------|
|      |            | AC    | 34 | 6488±217 | 0.615 | 78  | 5476±124 | 0.843 |
|      |            | CC    | 6  | 5550±925 | 0.055 | 9   | 5356±135 | 0.808 |
|      |            | CC+AC | 40 | 6348±206 | 0.382 | 87  | 5463±125 | 0.908 |
|      |            | Trend |    |          | 0.182 |     |          | 0.997 |
| C5   | rs2269066  | CC    | 71 | 6510±156 |       | 153 | 5531±138 |       |
|      |            | CT    | 30 | 6573±215 | 0.864 | 70  | 5439±119 | 0.886 |
|      |            | TT    | 2  | 5750±134 | 0.592 | 7   | 5386±154 | 0.618 |
|      |            | TT+CT | 32 | 6522±210 | 0.921 | 77  | 5434±122 | 0.789 |
|      |            | Trend |    |          | 0.985 |     |          | 0.696 |
| C5   | rs2159776  | TT    | 41 | 6512±145 |       | 74  | 5377±138 |       |
|      |            | CT    | 42 | 6314±178 | 0.260 | 115 | 5523±126 | 0.490 |
|      |            | CC    | 20 | 6935±217 | 0.444 | 39  | 5682±144 | 0.282 |
|      |            | CC+CT | 62 | 6515±192 | 0.591 | 154 | 5563±131 | 0.352 |
|      |            | Trend |    |          | 0.667 |     |          | 0.271 |
| C5   | rs7040033  | AA    | 38 | 6584±147 |       | 68  | 5357±139 |       |
|      |            | AG    | 42 | 6500±179 | 0.493 | 116 | 5510±125 | 0.394 |
|      |            | GG    | 23 | 6422±210 | 0.634 | 46  | 5678±142 | 0.172 |
|      |            | GG+AG | 65 | 6472±189 | 0.462 | 162 | 5558±130 | 0.249 |
|      |            | Trend |    |          | 0.577 |     |          | 0.169 |
| C5   | rs7031036  | GG    | 60 | 6352±161 |       | 132 | 5350±126 |       |
|      |            | CG    | 30 | 6817±209 | 0.832 | 85  | 5619±135 | 0.187 |
|      |            | CC    | 12 | 6425±138 | 0.585 | 11  | 5945±135 | 0.198 |
|      |            | CC+CG | 42 | 6705±191 | 0.703 | 96  | 5656±135 | 0.106 |
|      |            | Trend |    |          | 0.608 |     |          | 0.083 |
| C5   | rs12685344 | GG    | 93 | 6632±174 |       | 217 | 5491±133 |       |
|      |            | AG    | 10 | 5410±135 | 0.028 | 13  | 5631±131 | 0.330 |
| C5   | rs10116271 | TT    | 58 | 6531±164 |       | 117 | 5386±127 |       |
|      |            | CT    | 34 | 6644±193 | 0.896 | 95  | 5526±133 | 0.447 |
|      |            | CC    | 11 | 6018±165 | 0.370 | 18  | 6083±158 | 0.103 |
|      |            | CC+CT | 45 | 6491±187 | 0.618 | 113 | 5615±138 | 0.215 |
|      |            | Trend |    |          | 0.440 |     |          | 0.105 |
| C5   | rs2416810  | GG    | 71 | 6665±157 |       | 135 | 5497±135 |       |
|      |            | AG    | 26 | 6296±224 | 0.449 | 80  | 5494±131 | 0.623 |
|      |            | AA    | 6  | 5667±852 | 0.049 | 13  | 5492±135 | 0.588 |
|      |            | AA+AG | 32 | 6178±205 | 0.256 | 93  | 5494±131 | 0.771 |
|      |            | Trend |    |          | 0.116 |     |          | 0.990 |
| C5   | rs1468673  | TT    | 65 | 6620±152 |       | 135 | 5492±135 |       |
|      |            | CT    | 31 | 6510±222 | 0.946 | 83  | 5504±129 | 0.588 |
|      |            | CC    | 7  | 5543±844 | 0.024 | 12  | 5542±140 | 0.666 |
|      |            | CC+CT | 38 | 6332±206 | 0.594 | 95  | 5508±130 | 0.706 |
|      |            | Trend |    |          | 0.241 |     |          | 0.899 |
| C5R1 | rs4427917  | CC    | 24 | 6704±152 |       | 62  | 5497±117 |       |
|      |            | CG    | 56 | 6452±163 | 0.305 | 133 | 5468±137 | 0.566 |
|      |            | GG    | 23 | 6465±221 | 0.355 | 35  | 5620±145 | 0.860 |
|      |            | GG+CG | 79 | 6456±180 | 0.258 | 168 | 5499±138 | 0.601 |
|      |            | Trend |    |          | 0.338 |     |          | 0.772 |
| C6   | rs9200     | TT    | 44 | 6939±162 |       | 111 | 5513±128 |       |
|      |            | CT    | 48 | 6279±183 | 0.031 | 98  | 5448±130 | 0.861 |
|      |            | CC    | 11 | 5836±147 | 0.079 | 21  | 5662±170 | 0.706 |

|    |            |       |    |          |       |     |          |       |
|----|------------|-------|----|----------|-------|-----|----------|-------|
|    |            | CC+CT | 59 | 6197±176 | 0.019 | 119 | 5486±138 | 0.975 |
|    |            | Trend |    |          |       |     |          | 0.867 |
| C6 | rs3805711  | CC    | 60 | 6265±160 |       | 111 | 5559±137 |       |
|    |            | CT    | 33 | 6924±194 | 0.119 | 99  | 5442±130 | 0.419 |
|    |            | TT    | 10 | 6650±174 | 0.755 | 19  | 5500±128 | 0.805 |
|    |            | TT+CT | 43 | 6860±188 | 0.144 | 118 | 5452±129 | 0.437 |
|    |            | Trend |    |          |       |     |          | 0.536 |
| C6 | rs918608   | AA    | 44 | 6586±179 |       | 92  | 5324±132 |       |
|    |            | AG    | 44 | 6291±178 | 0.427 | 103 | 5717±135 | 0.035 |
|    |            | GG    | 15 | 6953±145 | 0.314 | 34  | 5300±122 | 0.929 |
|    |            | GG+AG | 59 | 6459±171 | 0.779 | 137 | 5613±133 | 0.125 |
|    |            | Trend |    |          |       |     |          | 0.580 |
| C6 | rs2301247  | TT    | 76 | 6478±168 |       | 178 | 5485±135 |       |
|    |            | CT    | 26 | 6565±193 | 0.722 | 48  | 5577±127 | 0.332 |
|    |            | CC    | 1  | 7900     | 0.566 | 4   | 5150±810 | 0.282 |
|    |            | CC+CT | 27 | 6615±191 | 0.700 | 52  | 5544±124 | 0.477 |
|    |            | Trend |    |          |       |     |          | 0.686 |
| C6 | rs3805715  | AA    | 44 | 6586±179 |       | 97  | 5380±137 |       |
|    |            | AG    | 46 | 6243±177 | 0.341 | 101 | 5665±131 | 0.121 |
|    |            | GG    | 13 | 7223±129 | 0.058 | 32  | 5331±122 | 0.923 |
|    |            | GG+AG | 59 | 6459±171 | 0.779 | 133 | 5585±129 | 0.272 |
|    |            | Trend |    |          |       |     |          | 0.684 |
| C6 | rs6865420  | CC    | 63 | 6852±178 |       | 138 | 5526±125 |       |
|    |            | AC    | 33 | 6021±149 | 0.025 | 79  | 5444±136 | 0.462 |
|    |            | AA    | 7  | 5786±189 | 0.179 | 13  | 5538±193 | 0.653 |
|    |            | AA+AC | 40 | 5980±154 | 0.015 | 92  | 5458±144 | 0.597 |
|    |            | Trend |    |          |       |     |          | 0.843 |
| C6 | rs6451566  | CC    | 48 | 6894±184 |       | 100 | 5581±127 |       |
|    |            | CT    | 40 | 6370±156 | 0.141 | 112 | 5454±129 | 0.305 |
|    |            | TT    | 15 | 5680±156 | 0.017 | 17  | 5382±187 | 0.855 |
|    |            | TT+CT | 55 | 6182±158 | 0.033 | 129 | 5444±137 | 0.326 |
|    |            | Trend |    |          |       |     |          | 0.468 |
| C6 | rs17260228 | CC    | 78 | 6554±167 |       | 187 | 5450±133 |       |
|    |            | CT    | 25 | 6388±196 | 0.557 | 40  | 5778±131 | 0.091 |
|    |            | TT    |    |          |       | 3   | 4800±500 | 0.048 |
|    |            | TT+CT | 25 | 6388±196 | 0.557 | 43  | 5709±129 | 0.192 |
|    |            | Trend |    |          |       |     |          | 0.406 |
| C6 | rs4413571  | TT    | 53 | 6564±168 |       | 131 | 5498±134 |       |
|    |            | AT    | 43 | 6460±183 | 0.852 | 83  | 5529±136 | 0.776 |
|    |            | AA    | 7  | 6457±178 | 0.389 | 16  | 5344±113 | 0.697 |
|    |            | AA+AT | 50 | 6460±181 | 0.722 | 99  | 5499±132 | 0.891 |
|    |            | Trend |    |          |       |     |          | 0.951 |
| C6 | rs13168926 | AA    | 35 | 6177±161 |       | 70  | 5346±117 |       |
|    |            | AG    | 43 | 6844±162 | 0.104 | 122 | 5628±144 | 0.316 |
|    |            | GG    | 25 | 6416±204 | 0.954 | 37  | 5395±119 | 0.847 |
|    |            | GG+AG | 68 | 6687±178 | 0.293 | 159 | 5574±139 | 0.378 |
|    |            | Trend |    |          |       |     |          | 0.633 |
| C6 | rs6451568  | TT    | 63 | 6784±182 |       | 131 | 5515±122 |       |
|    |            | CT    | 33 | 6106±148 | 0.057 | 89  | 5501±151 | 0.845 |

|    |            |       |     |          |        |     |          |        |
|----|------------|-------|-----|----------|--------|-----|----------|--------|
|    |            | CC    | 7   | 6000±183 | 0.297  | 10  | 5270±902 | 0.764  |
|    |            | CC+CT | 40  | 6088±152 | 0.044  | 99  | 5478±146 | 0.903  |
|    |            | Trend |     |          | 0.067  |     |          | 0.994  |
| C6 | rs7443604  | GG    | 36  | 6178±159 |        | 70  | 5346±117 |        |
|    |            | GT    | 42  | 6860±164 | 0.085  | 122 | 5628±144 | 0.316  |
|    |            | TT    | 25  | 6416±204 | 0.953  | 37  | 5395±119 | 0.847  |
|    |            | TT+GT | 67  | 6694±180 | 0.270  | 159 | 5574±139 | 0.378  |
|    |            | Trend |     |          | 0.808  |     |          | 0.633  |
| C6 | rs1444903  | CC    | 83  | 6494±178 |        | 155 | 5468±138 |        |
|    |            | CT    | 17  | 6306±150 | 0.844  | 68  | 5569±127 | 0.959  |
|    |            | TT    | 3   | 8233±121 | 0.002  | 6   | 5450±446 | 0.716  |
|    |            | TT+CT | 20  | 6595±159 | 0.395  | 74  | 5559±122 | 0.913  |
|    |            | Trend |     |          | 0.139  |     |          | 0.858  |
| C6 | rs1822821  | GG    | 46  | 6141±160 |        | 102 | 5462±123 |        |
|    |            | CG    | 35  | 6946±191 | 0.070  | 104 | 5543±142 | 0.957  |
|    |            | CC    | 22  | 6605±162 | 0.535  | 22  | 5500±139 | 0.967  |
|    |            | CC+CG | 57  | 6814±180 | 0.116  | 126 | 5536±141 | 0.975  |
|    |            | Trend |     |          | 0.342  |     |          | 0.997  |
| C6 | rs10512766 | CC    | 79  | 6530±167 |        | 190 | 5449±132 |        |
|    |            | CG    | 24  | 6458±197 | 0.735  | 36  | 5819±137 | 0.098  |
|    |            | GG    |     |          |        | 4   | 4950±507 | 0.114  |
|    |            | GG+CG | 24  | 6458±197 | 0.735  | 40  | 5733±133 | 0.207  |
|    |            | Trend |     |          | 0.735  |     |          | 0.426  |
| C6 | rs16871019 | AA    | 61  | 6489±181 |        | 173 | 5498±132 |        |
|    |            | AG    | 33  | 6561±165 | 0.719  | 52  | 5508±124 | 0.948  |
|    |            | GG    | 7   | 6243±186 | 0.609  | 3   | 3900±173 | <0.001 |
|    |            | GG+AG | 40  | 6505±167 | 0.626  | 55  | 5420±126 | 0.618  |
|    |            | Trend |     |          | 0.577  |     |          | 0.365  |
| C6 | rs7444800  | AA    | 28  | 6414±204 |        | 67  | 5572±130 |        |
|    |            | AG    | 50  | 6578±160 | 0.365  | 117 | 5444±141 | 0.489  |
|    |            | GG    | 24  | 6546±170 | 0.493  | 44  | 5432±992 | 0.905  |
|    |            | GG+AG | 74  | 6568±162 | 0.355  | 161 | 5440±130 | 0.573  |
|    |            | Trend |     |          | 0.479  |     |          | 0.822  |
| C6 | rs10071904 | GG    | 71  | 6468±179 |        | 148 | 5431±135 |        |
|    |            | AG    | 28  | 6364±156 | 0.880  | 74  | 5642±134 | 0.540  |
|    |            | AA    | 4   | 8375±102 | <0.001 | 7   | 5371±457 | 0.747  |
|    |            | AA+AG | 32  | 6616±163 | 0.378  | 81  | 5619±128 | 0.524  |
|    |            | Trend |     |          | 0.096  |     |          | 0.518  |
| C7 | rs13175903 | AA    | 103 | 6514±174 |        | 226 | 5515±133 |        |
|    |            | AG    |     |          |        | 4   | 4550±614 | 0.026  |
| C7 | rs12153063 | CC    | 103 | 6514±174 |        | 225 | 5504±134 |        |
|    |            | AC    |     |          |        | 4   | 5675±150 | 0.632  |
| C7 | rs1910016  | TT    | 75  | 6181±171 |        | 164 | 5579±134 |        |
|    |            | CT    | 23  | 7439±157 | 0.003  | 56  | 5330±113 | 0.126  |
|    |            | CC    | 2   | 7050±120 | 0.052  | 8   | 4475±116 | 0.054  |
|    |            | CC+CT | 25  | 7408±152 | 0.003  | 64  | 5223±116 | 0.042  |
|    |            | Trend |     |          | 0.006  |     |          | 0.021  |
| C7 | rs16870514 | GG    | 45  | 6158±152 |        | 102 | 5668±129 |        |
|    |            | AG    | 46  | 6750±178 | 0.156  | 106 | 5380±141 | 0.126  |



|    |           |       |    |          |       |     |          |        |
|----|-----------|-------|----|----------|-------|-----|----------|--------|
|    |           | AA    | 12 | 6942±218 | 0.327 | 22  | 5286±971 | 0.125  |
|    |           | AA+AG | 58 | 6790±185 | 0.127 | 128 | 5364±134 | 0.083  |
|    |           | Trend |    |          | 0.180 |     |          | 0.061  |
| C7 | rs9292794 | TT    | 36 | 7108±168 |       | 105 | 5346±132 |        |
|    |           | CT    | 58 | 6097±170 | 0.009 | 103 | 5631±130 | 0.046  |
|    |           | CC    | 9  | 6822±157 | 0.584 | 22  | 5609±144 | 0.323  |
|    |           | CC+CT | 67 | 6194±169 | 0.014 | 125 | 5627±132 | 0.046  |
|    |           | Trend |    |          | 0.097 |     |          | 0.099  |
| C7 | rs2455307 | GG    | 36 | 7108±168 |       | 102 | 5335±134 |        |
|    |           | AG    | 58 | 6097±170 | 0.009 | 105 | 5633±129 | 0.040  |
|    |           | AA    | 9  | 6822±157 | 0.584 | 23  | 5609±141 | 0.293  |
|    |           | AA+AG | 67 | 6194±169 | 0.014 | 128 | 5629±131 | 0.039  |
|    |           | Trend |    |          | 0.097 |     |          | 0.089  |
| C7 | rs2675982 | CC    | 88 | 6533±179 |       | 185 | 5566±133 |        |
|    |           | CT    | 15 | 6400±140 | 0.874 | 41  | 5268±131 | 0.487  |
|    |           | TT    |    |          |       | 4   | 4750±137 | 0.379  |
|    |           | TT+CT | 15 | 6400±140 | 0.874 | 45  | 5222±131 | 0.386  |
|    |           | Trend |    |          | 0.874 |     |          | 0.317  |
| C7 | rs324058  | AA    | 90 | 6411±163 |       | 199 | 5498±131 |        |
|    |           | AC    | 12 | 7275±241 | 0.603 | 29  | 5566±150 | 0.794  |
|    |           | CC    | 1  | 6600     | 0.205 | 2   | 4550±354 | <0.001 |
|    |           | CC+AC | 13 | 7223±231 | 0.569 | 31  | 5500±147 | 0.959  |
|    |           | Trend |    |          | 0.532 |     |          | 0.689  |
| C7 | rs3805221 | CC    | 63 | 6452±175 |       | 129 | 5473±138 |        |
|    |           | CT    | 35 | 6571±178 | 0.843 | 87  | 5534±126 | 0.979  |
|    |           | TT    | 4  | 6875±177 | 0.341 | 13  | 5608±123 | 0.241  |
|    |           | TT+CT | 39 | 6603±175 | 0.980 | 100 | 5544±125 | 0.774  |
|    |           | Trend |    |          | 0.756 |     |          | 0.530  |
| C7 | rs3828511 | GG    | 64 | 6564±190 |       | 146 | 5502±131 |        |
|    |           | GT    | 32 | 6353±150 | 0.565 | 78  | 5542±138 | 0.585  |
|    |           | TT    | 7  | 6786±116 | 0.117 | 6   | 4850±123 | 0.359  |
|    |           | TT+GT | 39 | 6431±144 | 0.931 | 84  | 5493±137 | 0.713  |
|    |           | Trend |    |          | 0.614 |     |          | 0.943  |
| C7 | rs6860438 | GG    | 53 | 6604±180 |       | 112 | 5623±145 |        |
|    |           | GT    | 45 | 6376±170 | 0.320 | 91  | 5356±119 | 0.102  |
|    |           | TT    | 5  | 6800±159 | 0.587 | 26  | 5508±123 | 0.783  |
|    |           | TT+GT | 50 | 6418±167 | 0.406 | 117 | 5390±119 | 0.150  |
|    |           | Trend |    |          | 0.639 |     |          | 0.328  |
| C7 | rs971075  | GG    | 55 | 6355±174 |       | 126 | 5546±130 |        |
|    |           | AG    | 36 | 6667±189 | 0.619 | 85  | 5420±136 | 0.754  |
|    |           | AA    | 10 | 6590±124 | 0.380 | 19  | 5537±145 | 0.875  |
|    |           | AA+AG | 46 | 6650±176 | 0.491 | 104 | 5441±137 | 0.830  |
|    |           | Trend |    |          | 0.389 |     |          | 0.954  |
| C7 | rs1450665 | GG    | 46 | 6341±153 |       | 113 | 5461±134 |        |
|    |           | GT    | 41 | 6690±185 | 0.328 | 92  | 5455±119 | 0.964  |
|    |           | TT    | 16 | 6556±205 | 0.634 | 25  | 5828±171 | 0.338  |
|    |           | TT+GT | 57 | 6653±189 | 0.328 | 117 | 5535±132 | 0.693  |
|    |           | Trend |    |          | 0.464 |     |          | 0.458  |
| C7 | rs7732104 | GG    | 93 | 6578±177 |       | 198 | 5559±135 |        |

|     |            |       |     |          |        |     |          |       |
|-----|------------|-------|-----|----------|--------|-----|----------|-------|
|     |            | AG    | 10  | 5910±135 | 0.205  | 31  | 5097±113 | 0.061 |
|     |            | AA    |     |          |        | 1   | 6000     | 0.810 |
|     |            | AA+AG | 10  | 5910±135 | 0.205  | 32  | 5125±113 | 0.062 |
|     |            | Trend |     |          | 0.205  |     |          | 0.069 |
| C7  | rs2122564  | CC    | 77  | 6492±163 |        | 156 | 5508±132 |       |
|     |            | CT    | 22  | 6495±218 | 0.699  | 66  | 5574±136 | 0.950 |
|     |            | TT    | 4   | 7025±125 | 0.557  | 8   | 4688±101 | 0.001 |
|     |            | TT+CT | 26  | 6577±206 | 0.773  | 74  | 5478±135 | 0.573 |
|     |            | Trend |     |          | 0.884  |     |          | 0.210 |
| C8A | rs671137   | CC    | 64  | 6394±164 |        | 148 | 5536±142 |       |
|     |            | CT    | 36  | 6703±185 | 0.256  | 77  | 5410±116 | 1.000 |
|     |            | TT    | 3   | 6800±280 | 0.880  | 5   | 5760±650 | 0.233 |
|     |            | TT+CT | 39  | 6710±189 | 0.279  | 82  | 5432±113 | 0.821 |
|     |            | Trend |     |          | 0.380  |     |          | 0.632 |
| C8A | rs622299   | TT    | 74  | 6369±177 |        | 188 | 5572±137 |       |
|     |            | CT    | 22  | 6618±167 | 0.599  | 39  | 5146±109 | 0.307 |
|     |            | CC    | 3   | 8233±128 | 0.001  | 2   | 5350±495 | 0.343 |
|     |            | CC+CT | 25  | 6812±169 | 0.332  | 41  | 5156±107 | 0.285 |
|     |            | Trend |     |          | 0.140  |     |          | 0.264 |
| C8A | rs1885002  | AA    | 37  | 6551±191 |        | 85  | 5439±118 |       |
|     |            | AG    | 50  | 6526±163 | 0.615  | 111 | 5594±135 | 0.996 |
|     |            | GG    | 16  | 6388±174 | 0.292  | 34  | 5338±157 | 0.552 |
|     |            | GG+AG | 66  | 6492±165 | 0.447  | 145 | 5534±141 | 0.826 |
|     |            | Trend |     |          | 0.305  |     |          | 0.622 |
| C8A | rs10489624 | TT    | 31  | 6397±151 |        | 70  | 5411±141 |       |
|     |            | CT    | 56  | 6670±195 | 0.462  | 124 | 5527±124 | 0.612 |
|     |            | CC    | 16  | 6194±136 | 0.966  | 36  | 5572±149 | 0.799 |
|     |            | CC+CT | 72  | 6564±183 | 0.531  | 160 | 5537±129 | 0.621 |
|     |            | Trend |     |          | 0.799  |     |          | 0.726 |
| C8A | rs6696110  | TT    | 79  | 6420±175 |        | 190 | 5569±136 |       |
|     |            | GT    | 23  | 6696±162 | 0.401  | 36  | 5086±110 | 0.124 |
|     |            | GG    | 1   | 9700     | <0.001 | 4   | 5875±690 | 0.256 |
|     |            | GG+GT | 24  | 6821±170 | 0.280  | 40  | 5165±108 | 0.276 |
|     |            | Trend |     |          | 0.176  |     |          | 0.565 |
| C8A | rs6699859  | CC    | 102 | 6515±174 |        | 227 | 5497±133 |       |
|     |            | CT    | 1   | 6400     | 0.880  | 3   | 5633±104 | 0.135 |
| C8A | rs679350   | GG    | 31  | 6300±145 |        | 78  | 5406±138 |       |
|     |            | AG    | 58  | 6721±193 | 0.334  | 117 | 5540±125 | 0.755 |
|     |            | AA    | 14  | 6129±145 | 0.936  | 35  | 5566±148 | 0.921 |
|     |            | AA+AG | 72  | 6606±185 | 0.418  | 152 | 5546±130 | 0.775 |
|     |            | Trend |     |          | 0.766  |     |          | 0.860 |
| C8A | rs624298   | GG    | 79  | 6500±179 |        | 172 | 5544±134 |       |
|     |            | AG    | 23  | 6504±160 | 0.656  | 54  | 5411±132 | 0.837 |
|     |            | AA    | 1   | 7800     | <0.001 | 4   | 4725±189 | 0.287 |
|     |            | AA+AG | 24  | 6558±159 | 0.559  | 58  | 5364±128 | 0.758 |
|     |            | Trend |     |          | 0.446  |     |          | 0.665 |
| C8B | rs911248   | GG    | 37  | 6424±180 |        | 75  | 5356±133 |       |
|     |            | GT    | 51  | 6620±178 | 0.692  | 111 | 5672±124 | 0.107 |
|     |            | TT    | 15  | 6373±152 | 0.882  | 43  | 5328±150 | 0.838 |

|     |            |       |     |          |       |     |          |       |
|-----|------------|-------|-----|----------|-------|-----|----------|-------|
|     |            | TT+GT | 66  | 6564±171 | 0.777 | 154 | 5576±132 | 0.257 |
|     |            | Trend |     |          | 0.997 |     |          | 0.866 |
| C8B | rs641714   | CC    | 28  | 6382±191 |       | 57  | 5349±138 |       |
|     |            | CG    | 55  | 6696±172 | 0.386 | 117 | 5666±124 | 0.150 |
|     |            | GG    | 20  | 6195±153 | 0.751 | 56  | 5302±143 | 0.973 |
|     |            | GG+CG | 75  | 6563±168 | 0.562 | 173 | 5548±131 | 0.328 |
|     |            | Trend |     |          | 0.861 |     |          | 0.970 |
| C8B | rs652553   | CC    | 89  | 6557±177 |       | 199 | 5528±135 |       |
|     |            | CT    | 14  | 6236±151 | 0.733 | 30  | 5343±118 | 0.787 |
| C8B | rs17301153 | CC    | 103 | 6514±174 |       | 225 | 5501±134 |       |
|     |            | CT    |     |          |       | 5   | 5380±887 | 0.662 |
| C8B | rs9661996  | CC    | 93  | 6468±175 |       | 205 | 5513±131 |       |
|     |            | AC    | 10  | 6940±161 | 0.220 | 24  | 5400±152 | 0.975 |
|     |            | AA    |     |          |       | 1   | 5000     | 0.066 |
|     |            | AA+AC | 10  | 6940±161 | 0.220 | 25  | 5384±149 | 0.979 |
|     |            | Trend |     |          | 0.220 |     |          | 0.925 |
| C8B | rs658285   | GG    | 32  | 6331±158 |       | 76  | 5489±130 |       |
|     |            | AG    | 50  | 6426±193 | 0.747 | 109 | 5548±138 | 0.986 |
|     |            | AA    | 21  | 7000±142 | 0.172 | 44  | 5420±127 | 0.135 |
|     |            | AA+AG | 71  | 6596±181 | 0.828 | 153 | 5511±134 | 0.586 |
|     |            | Trend |     |          | 0.245 |     |          | 0.186 |
| C8B | rs647571   | CC    | 34  | 7041±175 |       | 78  | 5483±135 |       |
|     |            | CT    | 51  | 6335±178 | 0.036 | 110 | 5576±130 | 0.227 |
|     |            | TT    | 18  | 6022±138 | 0.010 | 41  | 5349±136 | 0.981 |
|     |            | TT+CT | 69  | 6254±168 | 0.011 | 151 | 5515±132 | 0.335 |
|     |            | Trend |     |          | 0.005 |     |          | 0.752 |
| C8B | rs1013579  | TT    | 103 | 6514±174 |       | 227 | 5513±133 |       |
|     |            | CT    |     |          |       | 3   | 4400±346 | 0.444 |
| C8B | rs683916   | AA    | 32  | 6331±158 |       | 76  | 5497±129 |       |
|     |            | AT    | 49  | 6376±192 | 0.709 | 107 | 5507±141 | 0.848 |
|     |            | TT    | 22  | 7086±144 | 0.143 | 46  | 5509±121 | 0.282 |
|     |            | TT+AT | 71  | 6596±181 | 0.828 | 153 | 5507±135 | 0.583 |
|     |            | Trend |     |          | 0.212 |     |          | 0.319 |
| C8B | rs1984266  | GG    | 41  | 6349±156 |       | 69  | 5378±122 |       |
|     |            | AG    | 44  | 6509±195 | 0.933 | 114 | 5558±139 | 0.455 |
|     |            | AA    | 17  | 6900±165 | 0.504 | 45  | 5553±134 | 0.793 |
|     |            | AA+AG | 61  | 6618±187 | 0.849 | 159 | 5557±137 | 0.628 |
|     |            | Trend |     |          | 0.603 |     |          | 0.923 |
| C8B | rs1774916  | CC    | 29  | 6669±150 |       | 63  | 5559±145 |       |
|     |            | CT    | 53  | 6411±195 | 0.535 | 117 | 5514±130 | 0.760 |
|     |            | TT    | 21  | 6557±152 | 0.730 | 49  | 5410±124 | 0.841 |
|     |            | TT+CT | 74  | 6453±183 | 0.719 | 166 | 5483±128 | 0.875 |
|     |            | Trend |     |          | 0.797 |     |          | 0.875 |
| C8G | rs2071006  | GG    | 48  | 6348±180 |       | 122 | 5558±124 |       |
|     |            | GT    | 43  | 6535±158 | 0.531 | 93  | 5395±135 | 0.517 |
|     |            | TT    | 12  | 7100±200 | 0.325 | 13  | 5854±191 | 0.716 |
|     |            | TT+GT | 55  | 6658±168 | 0.382 | 106 | 5451±143 | 0.660 |
|     |            | Trend |     |          | 0.311 |     |          | 0.907 |
| C9  | rs17383601 | CC    | 89  | 6454±164 |       | 207 | 5507±134 |       |

|        |            |       |    |          |       |     |          |       |
|--------|------------|-------|----|----------|-------|-----|----------|-------|
| C9     | rs187451   | CG    | 14 | 6893±229 | 0.403 | 23  | 5426±117 | 0.541 |
|        |            | TT    | 63 | 6613±165 |       | 150 | 5438±126 |       |
|        |            | GT    | 32 | 6225±183 | 0.382 | 63  | 5706±152 | 0.593 |
|        |            | GG    | 8  | 6888±211 | 0.799 | 16  | 5325±110 | 0.424 |
|        |            | GG+GT | 40 | 6358±188 | 0.521 | 79  | 5629±145 | 0.823 |
|        |            | Trend |    |          | 0.774 |     | 0.858    |       |
| C9     | rs261753   | CC    | 50 | 6438±167 |       | 84  | 5469±141 |       |
|        |            | CT    | 38 | 6513±181 | 0.873 | 110 | 5550±129 | 0.228 |
|        |            | TT    | 15 | 6767±186 | 0.951 | 36  | 5411±127 | 0.393 |
|        |            | TT+CT | 53 | 6585±181 | 0.918 | 146 | 5516±128 | 0.493 |
|        |            | Trend |    |          | 0.980 |     |          | 0.774 |
| C9     | rs261752   | AA    | 35 | 6314±160 |       | 81  | 5630±143 |       |
|        |            | AG    | 42 | 6748±186 | 0.293 | 104 | 5376±121 | 0.022 |
|        |            | GG    | 26 | 6404±171 | 0.978 | 44  | 5541±140 | 0.333 |
|        |            | GG+AG | 68 | 6616±180 | 0.464 | 148 | 5425±127 | 0.037 |
|        |            | Trend |    |          | 0.901 |     |          | 0.179 |
| C9     | rs11953839 | GG    | 45 | 6829±170 |       | 80  | 5589±133 |       |
|        |            | AG    | 39 | 6318±183 | 0.320 | 104 | 5342±111 | 0.568 |
|        |            | AA    | 19 | 6168±157 | 0.231 | 46  | 5696±170 | 0.144 |
|        |            | AA+AG | 58 | 6269±174 | 0.205 | 150 | 5451±132 | 0.827 |
|        |            | Trend |    |          | 0.191 |     |          | 0.222 |
| C9     | rs4957473  | AA    | 58 | 6669±179 |       | 130 | 5640±135 |       |
|        |            | AG    | 41 | 6412±169 | 0.472 | 89  | 5249±123 | 0.009 |
|        |            | GG    | 4  | 5300±980 | 0.055 | 11  | 5845±155 | 0.747 |
|        |            | GG+AG | 45 | 6313±166 | 0.316 | 100 | 5315±128 | 0.026 |
|        |            | Trend |    |          | 0.149 |     |          | 0.148 |
| DAB2   | rs700238   | CC    | 88 | 6608±178 |       | 192 | 5544±135 |       |
|        |            | CG    | 15 | 5960±138 | 0.243 | 36  | 5253±115 | 0.389 |
|        |            | GG    |    |          |       | 2   | 5550±233 | 0.538 |
|        |            | GG+CG | 15 | 5960±138 | 0.243 | 38  | 5268±118 | 0.339 |
|        |            | Trend |    |          | 0.243 |     |          | 0.311 |
| DAB2   | rs1046033  | AA    | 48 | 6565±163 |       | 112 | 5567±140 |       |
|        |            | AG    | 44 | 6543±188 | 0.881 | 94  | 5424±131 | 0.224 |
|        |            | GG    | 11 | 6173±171 | 0.706 | 24  | 5471±998 | 0.781 |
|        |            | GG+AG | 55 | 6469±184 | 0.797 | 118 | 5434±125 | 0.333 |
|        |            | Trend |    |          | 0.723 |     |          | 0.634 |
| DAB2   | rs700239   | CC    | 39 | 6644±166 |       | 85  | 5664±142 |       |
|        |            | AC    | 47 | 6606±187 | 0.940 | 108 | 5396±135 | 0.093 |
|        |            | AA    | 17 | 5959±150 | 0.304 | 37  | 5419±981 | 0.481 |
|        |            | AA+AC | 64 | 6434±179 | 0.671 | 145 | 5402±126 | 0.118 |
|        |            | Trend |    |          | 0.390 |     |          | 0.261 |
| CARD15 | rs7194886  | CC    | 75 | 6559±185 |       | 179 | 5467±142 |       |
|        |            | CT    | 23 | 6309±133 | 0.766 | 49  | 5573±916 | 0.142 |
|        |            | TT    | 5  | 6780±182 | 0.422 | 2   | 6500±183 | 0.069 |
|        |            | TT+CT | 28 | 6393±140 | 0.598 | 51  | 5610±952 | 0.095 |
|        |            | Trend |    |          | 0.493 |     |          | 0.061 |
| CARD15 | rs17312836 | AA    | 66 | 6698±170 |       | 151 | 5519±133 |       |
|        |            | AC    | 34 | 6162±185 | 0.129 | 71  | 5504±130 | 0.963 |
|        |            | CC    | 3  | 6433±404 | 0.967 | 7   | 4957±168 | 0.123 |

|        |            |       |    |          |       |     |          |       |
|--------|------------|-------|----|----------|-------|-----|----------|-------|
|        |            | CC+AC | 37 | 6184±177 | 0.138 | 78  | 5455±134 | 0.591 |
|        |            | Trend |    |          |       |     |          | 0.326 |
| CARD15 | rs751271   | TT    | 62 | 6627±179 |       | 148 | 5502±133 |       |
|        |            | GT    | 35 | 6374±180 | 0.441 | 70  | 5543±132 | 0.912 |
|        |            | GG    | 6  | 6150±476 | 0.704 | 12  | 5200±134 | 0.289 |
|        |            | GG+GT | 41 | 6341±167 | 0.433 | 82  | 5493±132 | 0.781 |
|        |            | Trend |    |          |       |     |          | 0.510 |
| CARD15 | rs8056611  | AA    | 46 | 6526±176 |       | 129 | 5580±136 |       |
|        |            | AG    | 40 | 6635±181 | 0.821 | 80  | 5455±120 | 0.405 |
|        |            | GG    | 16 | 6281±156 | 0.719 | 18  | 4928±121 | 0.022 |
|        |            | GG+AG | 56 | 6534±173 | 0.953 | 98  | 5358±121 | 0.124 |
|        |            | Trend |    |          |       |     |          | 0.036 |
| CARD15 | rs718226   | AA    | 72 | 6707±172 |       | 152 | 5516±131 |       |
|        |            | AG    | 30 | 6037±175 | 0.088 | 72  | 5519±133 | 0.741 |
|        |            | GG    | 1  | 6900     | 0.740 | 5   | 4920±205 | 0.253 |
|        |            | GG+AG | 31 | 6065±172 | 0.090 | 77  | 5481±137 | 0.508 |
|        |            | Trend |    |          |       |     |          | 0.349 |
| CARD4  | rs5743369  | TT    | 85 | 6356±175 |       | 194 | 5518±136 |       |
|        |            | CT    | 13 | 7285±166 | 0.012 | 34  | 5444±117 | 0.725 |
|        |            | CC    | 5  | 7180±115 | 0.114 | 1   | 5400     | 0.611 |
|        |            | CC+CT | 18 | 7256±150 | 0.005 | 35  | 5443±115 | 0.735 |
|        |            | Trend |    |          |       |     |          | 0.747 |
| CARD4  | rs10267377 | GG    | 41 | 6573±179 |       | 91  | 5589±136 |       |
|        |            | CG    | 50 | 6470±183 | 0.613 | 112 | 5418±129 | 0.473 |
|        |            | CC    | 12 | 6492±120 | 0.285 | 25  | 5568±140 | 0.968 |
|        |            | CC+CG | 62 | 6474±172 | 0.506 | 137 | 5445±131 | 0.547 |
|        |            | Trend |    |          |       |     |          | 0.757 |
| CARD4  | rs2907749  | AA    | 46 | 6770±170 |       | 101 | 5557±132 |       |
|        |            | AG    | 45 | 6380±175 | 0.188 | 104 | 5481±140 | 0.862 |
|        |            | GG    | 12 | 6033±181 | 0.132 | 24  | 5379±102 | 0.773 |
|        |            | GG+AG | 57 | 6307±176 | 0.104 | 128 | 5462±133 | 0.818 |
|        |            | Trend |    |          |       |     |          | 0.773 |
| CARD4  | rs2075821  | CC    | 51 | 6269±167 |       | 105 | 5534±134 |       |
|        |            | CT    | 40 | 6693±171 | 0.166 | 112 | 5504±133 | 0.898 |
|        |            | TT    | 12 | 6958±208 | 0.243 | 12  | 5217±123 | 0.425 |
|        |            | TT+CT | 52 | 6754±178 | 0.108 | 124 | 5477±132 | 0.741 |
|        |            | Trend |    |          |       |     |          | 0.550 |
| CARD4  | rs7789045  | AA    | 39 | 6638±185 |       | 91  | 5403±130 |       |
|        |            | AT    | 56 | 6427±174 | 0.506 | 110 | 5533±129 | 0.755 |
|        |            | TT    | 8  | 6513±124 | 0.669 | 28  | 5718±157 | 0.380 |
|        |            | TT+AT | 64 | 6438±167 | 0.505 | 138 | 5570±135 | 0.585 |
|        |            | Trend |    |          |       |     |          | 0.427 |
| CARD4  | rs3823773  | TT    | 71 | 6328±180 |       | 175 | 5496±130 |       |
|        |            | CT    | 29 | 7072±153 | 0.005 | 49  | 5496±146 | 0.967 |
|        |            | CC    | 3  | 5500±721 | 0.042 | 6   | 5600±107 | 0.844 |
|        |            | CC+CT | 32 | 6925±154 | 0.025 | 55  | 5507±142 | 0.995 |
|        |            | Trend |    |          |       |     |          | 0.950 |
| CARD4  | rs6949758  | GG    | 49 | 6333±184 |       | 104 | 5504±132 |       |
|        |            | CG    | 43 | 6626±150 | 0.187 | 111 | 5561±134 | 0.909 |

|              |            |       |     |          |       |     |          |       |
|--------------|------------|-------|-----|----------|-------|-----|----------|-------|
|              |            | CC    | 11  | 6882±216 | 0.342 | 15  | 5000±119 | 0.224 |
|              |            | CC+CG | 54  | 6678±164 | 0.145 | 126 | 5494±133 | 0.819 |
|              |            | Trend |     |          | 0.194 |     |          | 0.459 |
| <i>CARD4</i> | rs4722986  | GG    | 46  | 6720±170 |       | 100 | 5482±130 |       |
|              |            | AG    | 47  | 6319±181 | 0.160 | 104 | 5545±142 | 0.725 |
|              |            | AA    | 10  | 6480±162 | 0.599 | 25  | 5420±103 | 0.929 |
|              |            | AA+AG | 57  | 6347±176 | 0.170 | 129 | 5521±135 | 0.740 |
|              |            | Trend |     |          | 0.255 |     |          | 0.802 |
| <i>CARD4</i> | rs2529440  | TT    | 38  | 6661±168 |       | 90  | 5412±130 |       |
|              |            | CT    | 58  | 6412±183 | 0.363 | 115 | 5572±133 | 0.609 |
|              |            | CC    | 7   | 6557±134 | 0.565 | 24  | 5521±143 | 0.698 |
|              |            | CC+CT | 65  | 6428±178 | 0.356 | 139 | 5563±134 | 0.584 |
|              |            | Trend |     |          | 0.380 |     |          | 0.599 |
| <i>CARD4</i> | rs4720004  | TT    | 45  | 6747±171 |       | 101 | 5474±129 |       |
|              |            | CT    | 48  | 6302±179 | 0.136 | 103 | 5553±143 | 0.719 |
|              |            | CC    | 10  | 6480±162 | 0.571 | 25  | 5420±103 | 0.927 |
|              |            | CC+CT | 58  | 6333±175 | 0.145 | 128 | 5527±136 | 0.733 |
|              |            | Trend |     |          | 0.229 |     |          | 0.796 |
| <i>CARD4</i> | rs2970503  | GG    | 101 | 6502±175 |       | 227 | 5489±132 |       |
|              |            | AG    | 2   | 7100±127 | 0.068 | 3   | 6233±193 | 0.632 |
| <i>CARD4</i> | rs2256023  | CC    | 40  | 6613±165 |       | 90  | 5412±130 |       |
|              |            | CT    | 56  | 6438±186 | 0.466 | 115 | 5572±133 | 0.609 |
|              |            | TT    | 7   | 6557±134 | 0.622 | 24  | 5521±143 | 0.698 |
|              |            | TT+CT | 63  | 6451±180 | 0.455 | 139 | 5563±134 | 0.584 |
|              |            | Trend |     |          | 0.466 |     |          | 0.599 |
| <i>CCL18</i> | rs8073066  | CC    | 36  | 6461±155 |       | 92  | 5495±124 |       |
|              |            | CT    | 44  | 6509±192 | 0.963 | 88  | 5376±125 | 0.679 |
|              |            | TT    | 23  | 6604±171 | 0.849 | 49  | 5751±159 | 0.411 |
|              |            | TT+CT | 67  | 6542±184 | 0.904 | 137 | 5510±139 | 0.853 |
|              |            | Trend |     |          | 0.855 |     |          | 0.494 |
| <i>CCL18</i> | rs2015070  | CC    | 82  | 6439±175 |       | 181 | 5552±131 |       |
|              |            | CT    | 21  | 6805±169 | 0.201 | 44  | 5227±135 | 0.238 |
|              |            | TT    |     |          |       | 5   | 5960±164 | 0.940 |
|              |            | TT+CT | 21  | 6805±169 | 0.201 | 49  | 5302±138 | 0.263 |
|              |            | Trend |     |          | 0.201 |     |          | 0.347 |
| <i>CCL18</i> | rs11080372 | AA    | 34  | 6609±202 |       | 71  | 5541±121 |       |
|              |            | AG    | 54  | 6624±158 | 0.667 | 121 | 5478±133 | 0.947 |
|              |            | GG    | 15  | 5900±155 | 0.124 | 38  | 5487±153 | 0.492 |
|              |            | GG+AG | 69  | 6467±159 | 0.889 | 159 | 5480±138 | 0.743 |
|              |            | Trend |     |          | 0.295 |     |          | 0.532 |
| <i>CCL18</i> | rs854477   | GG    | 37  | 6397±161 |       | 88  | 5507±134 |       |
|              |            | AG    | 52  | 6481±182 | 0.862 | 105 | 5515±135 | 0.658 |
|              |            | AA    | 14  | 6943±181 | 0.664 | 37  | 5432±127 | 0.749 |
|              |            | AA+AG | 66  | 6579±181 | 0.773 | 142 | 5494±132 | 0.645 |
|              |            | Trend |     |          | 0.682 |     |          | 0.689 |
| <i>CCL2</i>  | rs17652343 | AA    | 88  | 6515±169 |       | 196 | 5468±125 |       |
|              |            | AG    | 15  | 6507±207 | 0.906 | 33  | 5691±174 | 0.684 |
|              |            | GG    |     |          |       | 1   | 5200     | 0.373 |
|              |            | GG+AG | 15  | 6507±207 | 0.906 | 34  | 5676±171 | 0.699 |

|       |            |       |     |          |        |     |          |       |
|-------|------------|-------|-----|----------|--------|-----|----------|-------|
|       |            | Trend |     |          | 0.906  |     |          | 0.717 |
| CCL2  | rs2857653  | CC    | 93  | 6543±176 |        | 191 | 5495±130 |       |
|       |            | CT    | 10  | 6240±156 | 0.756  | 36  | 5361±131 | 0.809 |
|       |            | TT    |     |          |        | 2   | 6200±849 | 0.500 |
|       |            | TT+CT | 10  | 6240±156 | 0.756  | 38  | 5405±129 | 0.751 |
|       |            | Trend |     |          |        |     |          | 0.696 |
| CCL2  | rs1860190  | AA    | 39  | 6613±170 |        | 82  | 5333±119 |       |
|       |            | AT    | 44  | 6586±187 | 0.827  | 112 | 5455±123 | 0.511 |
|       |            | TT    | 20  | 6160±152 | 0.409  | 36  | 6011±175 | 0.041 |
|       |            | TT+AT | 64  | 6453±177 | 0.886  | 148 | 5591±139 | 0.198 |
|       |            | Trend |     |          |        |     |          | 0.051 |
| CCL2  | rs991804   | TT    | 38  | 6561±170 |        | 80  | 5353±119 |       |
|       |            | CT    | 45  | 6631±187 | 0.827  | 109 | 5435±125 | 0.641 |
|       |            | CC    | 20  | 6160±152 | 0.409  | 41  | 5954±168 | 0.032 |
|       |            | CC+CT | 65  | 6486±177 | 0.886  | 150 | 5577±139 | 0.228 |
|       |            | Trend |     |          |        |     |          | 0.046 |
| CCL7  | rs2190970  | TT    | 71  | 6372±174 |        | 168 | 5443±133 |       |
|       |            | CT    | 31  | 6706±159 | 0.353  | 60  | 5628±134 | 0.913 |
|       |            | CC    | 1   | 10600    | <0.001 | 2   | 6250±778 | 0.039 |
|       |            | CC+CT | 32  | 6828±170 | 0.250  | 62  | 5648±132 | 0.941 |
|       |            | Trend |     |          |        |     |          | 0.778 |
| CCL7  | rs3091322  | GG    | 36  | 6631±169 |        | 79  | 5330±122 |       |
|       |            | AG    | 45  | 6549±190 | 0.837  | 110 | 5455±123 | 0.459 |
|       |            | AA    | 22  | 6250±150 | 0.419  | 41  | 5939±168 | 0.037 |
|       |            | AA+AG | 67  | 6451±177 | 0.633  | 151 | 5587±138 | 0.166 |
|       |            | Trend |     |          |        |     |          | 0.043 |
| CCL7  | rs3091324  | GG    | 78  | 6545±175 |        | 161 | 5405±137 |       |
|       |            | GT    | 24  | 6363±175 | 0.353  | 66  | 5691±117 | 0.086 |
|       |            | TT    | 1   | 7700     | 0.174  | 3   | 6300±185 | 0.083 |
|       |            | TT+GT | 25  | 6416±174 | 0.393  | 69  | 5717±120 | 0.060 |
|       |            | Trend |     |          |        |     |          | 0.038 |
| CCL7  | rs3091327  | AA    | 103 | 6514±174 |        | 227 | 5498±133 |       |
|       |            | AG    |     |          |        | 3   | 5567±145 | 0.634 |
| CCL7  | rs8081047  | TT    | 81  | 6515±180 |        | 191 | 5448±121 |       |
|       |            | CT    | 19  | 6511±149 | 0.614  | 35  | 5934±181 | 0.224 |
|       |            | CC    | 3   | 6500±208 | 0.722  | 2   | 4400±566 | 0.076 |
|       |            | CC+CT | 22  | 6509±152 | 0.674  | 37  | 5851±180 | 0.330 |
|       |            | Trend |     |          |        |     |          | 0.517 |
| CCL11 | rs3091328  | GG    | 38  | 6561±170 |        | 81  | 5330±120 |       |
|       |            | AG    | 43  | 6681±189 | 0.757  | 111 | 5462±124 | 0.432 |
|       |            | AA    | 22  | 6105±147 | 0.343  | 37  | 5981±173 | 0.038 |
|       |            | AA+AG | 65  | 6486±177 | 0.886  | 148 | 5592±139 | 0.156 |
|       |            | Trend |     |          |        |     |          | 0.043 |
| CCL11 | rs12948058 | GG    | 46  | 6670±175 |        | 101 | 5268±118 |       |
|       |            | AG    | 44  | 6355±178 | 0.311  | 104 | 5584±127 | 0.135 |
|       |            | AA    | 13  | 6500±164 | 0.587  | 25  | 6076±188 | 0.067 |
|       |            | AA+AG | 57  | 6388±173 | 0.295  | 129 | 5679±141 | 0.051 |
|       |            | Trend |     |          |        |     |          | 0.032 |
| CCL11 | rs4795895  | GG    | 85  | 6553±175 |        | 197 | 5539±134 |       |

|              |            |       |    |          |       |     |          |       |
|--------------|------------|-------|----|----------|-------|-----|----------|-------|
|              |            | AG    | 18 | 6328±168 | 0.858 | 31  | 5197±121 | 0.577 |
|              |            | AA    |    |          |       | 2   | 6200±849 | 0.575 |
|              |            | AA+AG | 18 | 6328±168 | 0.858 | 33  | 5258±120 | 0.625 |
|              |            | Trend |    |          | 0.858 |     |          | 0.684 |
| <i>CCL11</i> | rs4795896  | CC    | 36 | 6631±169 |       | 79  | 5330±122 |       |
|              |            | CT    | 44 | 6589±190 | 0.891 | 110 | 5455±123 | 0.459 |
|              |            | TT    | 23 | 6187±149 | 0.354 | 41  | 5939±168 | 0.037 |
|              |            | TT+CT | 67 | 6451±177 | 0.633 | 151 | 5587±138 | 0.166 |
|              |            | Trend |    |          | 0.393 |     |          | 0.043 |
| <i>CCL11</i> | rs17735961 | CC    | 83 | 6530±172 |       | 160 | 5412±137 |       |
|              |            | AC    | 20 | 6445±185 | 0.563 | 65  | 5689±118 | 0.090 |
|              |            | AA    |    |          |       | 3   | 6300±185 | 0.084 |
|              |            | AA+AC | 20 | 6445±185 | 0.563 | 68  | 5716±121 | 0.063 |
|              |            | Trend |    |          | 0.563 |     |          | 0.039 |
| <i>CCL11</i> | rs16969415 | CC    | 80 | 6536±180 |       | 192 | 5440±121 |       |
|              |            | CT    | 20 | 6425±150 | 0.756 | 36  | 5875±182 | 0.357 |
|              |            | TT    | 3  | 6500±208 | 0.699 | 2   | 4400±566 | 0.069 |
|              |            | TT+CT | 23 | 6435±153 | 0.816 | 38  | 5797±180 | 0.489 |
|              |            | Trend |    |          | 0.897 |     |          | 0.689 |
| <i>CCL11</i> | rs714910   | CC    | 41 | 6673±168 |       | 80  | 5330±121 |       |
|              |            | AC    | 40 | 6575±192 | 0.833 | 107 | 5414±117 | 0.609 |
|              |            | AA    | 22 | 6105±147 | 0.226 | 41  | 5939±168 | 0.038 |
|              |            | AA+AC | 62 | 6408±178 | 0.505 | 148 | 5559±135 | 0.225 |
|              |            | Trend |    |          | 0.268 |     |          | 0.051 |
| <i>CCL11</i> | rs4795904  | GG    | 85 | 6564±169 |       | 189 | 5439±123 |       |
|              |            | AG    | 18 | 6278±198 | 0.479 | 40  | 5790±170 | 0.460 |
|              |            | AA    |    |          |       | 1   | 5200     | 0.425 |
|              |            | AA+AG | 18 | 6278±198 | 0.479 | 41  | 5776±168 | 0.470 |
|              |            | Trend |    |          | 0.479 |     |          | 0.485 |
| <i>CCL8</i>  | rs885691   | CC    | 74 | 6554±183 |       | 189 | 5578±134 |       |
|              |            | CT    | 28 | 6446±152 | 0.742 | 34  | 5050±119 | 0.130 |
|              |            | TT    | 1  | 5400     | 0.369 | 7   | 5529±123 | 0.119 |
|              |            | TT+CT | 29 | 6410±151 | 0.765 | 41  | 5132±120 | 0.081 |
|              |            | Trend |    |          | 0.805 |     |          | 0.057 |
| <i>CCL8</i>  | rs3138034  | CC    | 93 | 6512±166 |       | 188 | 5441±123 |       |
|              |            | CT    | 10 | 6530±246 | 0.898 | 39  | 5597±156 | 0.896 |
|              |            | TT    |    |          |       | 1   | 5200     | 0.648 |
|              |            | TT+CT | 10 | 6530±246 | 0.898 | 40  | 5588±154 | 0.903 |
|              |            | Trend |    |          | 0.898 |     |          | 0.911 |
| <i>CCL8</i>  | rs8082480  | CC    | 58 | 6495±174 |       | 114 | 5299±122 |       |
|              |            | AC    | 36 | 6611±163 | 0.867 | 96  | 5574±139 | 0.383 |
|              |            | AA    | 9  | 6244±228 | 0.424 | 20  | 6275±138 | 0.001 |
|              |            | AA+AC | 45 | 6538±175 | 0.821 | 116 | 5695±141 | 0.082 |
|              |            | Trend |    |          | 0.574 |     |          | 0.006 |
| <i>CCL8</i>  | rs3138035  | CC    | 92 | 6498±166 |       | 183 | 5473±122 |       |
|              |            | CT    | 11 | 6645±237 | 0.912 | 44  | 5545±162 | 0.801 |
|              |            | TT    |    |          |       | 1   | 5200     | 0.520 |
|              |            | TT+CT | 11 | 6645±237 | 0.912 | 45  | 5538±160 | 0.795 |
|              |            | Trend |    |          | 0.912 |     |          | 0.786 |



|       |            |       |    |          |       |     |          |        |
|-------|------------|-------|----|----------|-------|-----|----------|--------|
| CCL8  | rs3138037  | TT    | 58 | 6495±174 |       | 115 | 5338±122 |        |
|       |            | CT    | 36 | 6611±163 | 0.867 | 95  | 5529±139 | 0.839  |
|       |            | CC    | 9  | 6244±228 | 0.424 | 20  | 6275±138 | 0.002  |
|       |            | CC+CT | 45 | 6538±175 | 0.821 | 115 | 5659±141 | 0.270  |
|       |            | Trend |    |          | 0.574 |     |          | 0.030  |
| CCL13 | rs442319   | AA    | 53 | 6277±154 |       | 106 | 5304±117 |        |
|       |            | AG    | 30 | 6917±191 | 0.107 | 102 | 5505±136 | 0.664  |
|       |            | GG    | 20 | 6535±193 | 0.672 | 20  | 6275±138 | 0.002  |
|       |            | GG+AG | 50 | 6764±191 | 0.366 | 122 | 5631±139 | 0.205  |
|       |            | Trend |    |          | 0.908 |     |          | 0.019  |
| CCL1  | rs408121   | GG    | 82 | 6489±166 |       | 178 | 5494±120 |        |
|       |            | AG    | 21 | 6610±205 | 0.972 | 49  | 5576±172 | 0.684  |
|       |            | AA    |    |          |       | 2   | 4600±849 | 0.062  |
|       |            | AA+AG | 21 | 6610±205 | 0.972 | 51  | 5537±170 | 0.600  |
|       |            | Trend |    |          | 0.972 |     |          | 0.499  |
| CCL1  | rs365654   | GG    | 56 | 6411±163 |       | 122 | 5384±127 |        |
|       |            | AG    | 41 | 6820±180 | 0.333 | 93  | 5482±134 | 0.346  |
|       |            | AA    | 6  | 5383±201 | 0.241 | 15  | 6540±135 | <0.001 |
|       |            | AA+AG | 47 | 6636±187 | 0.680 | 108 | 5629±138 | 0.083  |
|       |            | Trend |    |          | 0.783 |     |          | 0.006  |
| CCL13 | rs1431991  | GG    | 31 | 6716±171 |       | 62  | 5411±125 |        |
|       |            | AG    | 54 | 6454±187 | 0.397 | 126 | 5526±135 | 0.293  |
|       |            | AA    | 18 | 6344±137 | 0.503 | 42  | 5545±139 | 0.831  |
|       |            | AA+AG | 72 | 6426±175 | 0.372 | 168 | 5531±136 | 0.365  |
|       |            | Trend |    |          | 0.435 |     |          | 0.721  |
| CCL1  | rs2282691  | AA    | 44 | 6598±189 |       | 87  | 5820±143 |        |
|       |            | AT    | 48 | 6569±167 | 0.293 | 105 | 5262±120 | 0.052  |
|       |            | TT    | 11 | 5936±138 | 0.087 | 36  | 5439±131 | 0.197  |
|       |            | TT+AT | 59 | 6451±163 | 0.730 | 141 | 5307±123 | 0.048  |
|       |            | Trend |    |          | 0.556 |     |          | 0.109  |
| CCL1  | rs7502772  | AA    | 41 | 6812±191 |       | 112 | 5671±139 |        |
|       |            | AG    | 57 | 6368±162 | 0.301 | 96  | 5302±125 | 0.248  |
|       |            | GG    | 5  | 5720±133 | 0.097 | 22  | 5477±125 | 0.613  |
|       |            | GG+AG | 62 | 6316±160 | 0.208 | 118 | 5335±125 | 0.250  |
|       |            | Trend |    |          | 0.111 |     |          | 0.339  |
| CCL1  | rs12603965 | CC    | 57 | 6358±154 |       | 129 | 5418±126 |        |
|       |            | CT    | 39 | 6695±193 | 0.658 | 95  | 5586±144 | 0.281  |
|       |            | TT    | 7  | 6771±222 | 0.503 | 5   | 5860±680 | 0.714  |
|       |            | TT+CT | 46 | 6707±195 | 0.508 | 100 | 5600±141 | 0.274  |
|       |            | Trend |    |          | 0.431 |     |          | 0.276  |
| CCL20 | rs13389224 | TT    | 30 | 6643±152 |       | 81  | 5688±151 |        |
|       |            | CT    | 52 | 6623±197 | 0.851 | 107 | 5281±125 | 0.097  |
|       |            | CC    | 21 | 6057±137 | 0.209 | 42  | 5688±104 | 0.636  |
|       |            | CC+CT | 73 | 6460±182 | 0.505 | 149 | 5396±120 | 0.282  |
|       |            | Trend |    |          | 0.234 |     |          | 0.882  |
| CCL20 | rs1827924  | AA    | 54 | 6604±186 |       | 127 | 5616±142 |        |
|       |            | AG    | 31 | 6335±169 | 0.523 | 87  | 5249±114 | 0.014  |
|       |            | GG    | 18 | 6550±149 | 0.879 | 13  | 5769±921 | 0.354  |
|       |            | GG+AG | 49 | 6414±161 | 0.607 | 100 | 5317±112 | 0.056  |

|       |            |       |    |          |       |       |          |       |
|-------|------------|-------|----|----------|-------|-------|----------|-------|
|       |            | Trend |    |          | 0.751 |       |          | 0.279 |
| CCL20 | rs13034664 | GG    | 68 | 6562±167 |       | 157   | 5337±125 |       |
|       |            | AG    | 28 | 6479±202 | 0.982 | 66    | 5897±144 | 0.014 |
|       |            | AA    | 7  | 6186±135 | 0.442 | 7     | 5371±124 | 0.525 |
|       |            | AA+AG | 35 | 6420±189 | 0.779 | 73    | 5847±142 | 0.013 |
|       |            | Trend |    |          |       | 0.596 |          |       |
| CCL20 | rs6749704  | TT    | 57 | 6670±185 |       | 116   | 5581±144 |       |
|       |            | CT    | 36 | 6233±159 | 0.137 | 103   | 5417±121 | 0.273 |
|       |            | CC    | 9  | 6656±171 | 0.544 | 10    | 5510±115 | 0.793 |
|       |            | CC+CT | 45 | 6318±160 | 0.133 | 113   | 5425±120 | 0.343 |
|       |            | Trend |    |          |       | 0.213 |          |       |
| CCL20 | rs940339   | TT    | 65 | 6562±163 |       | 147   | 5438±135 |       |
|       |            | CT    | 31 | 6471±173 | 0.708 | 76    | 5558±130 | 0.674 |
|       |            | CC    | 7  | 6257±281 | 0.552 | 6     | 6433±952 | 0.001 |
|       |            | CC+CT | 38 | 6432±192 | 0.561 | 82    | 5622±129 | 0.439 |
|       |            | Trend |    |          |       | 0.516 |          |       |
| CCL24 | rs13340508 | TT    | 57 | 6298±151 |       | 101   | 5474±141 |       |
|       |            | CT    | 36 | 6750±214 | 0.391 | 111   | 5488±129 | 0.830 |
|       |            | CC    | 10 | 6890±120 | 0.157 | 18    | 5700±103 | 0.588 |
|       |            | CC+CT | 46 | 6780±196 | 0.266 | 129   | 5518±126 | 0.764 |
|       |            | Trend |    |          |       | 0.169 |          |       |
| CCL24 | rs7797547  | AA    | 42 | 6219±154 |       | 73    | 5473±139 |       |
|       |            | AG    | 44 | 6841±188 | 0.094 | 119   | 5544±138 | 0.976 |
|       |            | GG    | 17 | 6394±177 | 0.777 | 38    | 5408±104 | 0.992 |
|       |            | GG+AG | 61 | 6716±185 | 0.154 | 157   | 5511±130 | 0.983 |
|       |            | Trend |    |          |       | 0.438 |          |       |
| CCL24 | rs13340490 | AA    | 81 | 6558±174 |       | 183   | 5540±133 |       |
|       |            | AG    | 22 | 6350±176 | 0.772 | 47    | 5338±133 | 0.505 |
| CCL24 | rs11465307 | AA    | 97 | 6445±174 |       | 215   | 5529±133 |       |
|       |            | AG    | 5  | 7760±158 | 0.067 | 14    | 5050±132 | 0.255 |
|       |            | GG    | 1  | 6900     | 0.431 | 1     | 5200     | 0.017 |
|       |            | GG+AG | 6  | 7617±146 | 0.073 | 15    | 5060±128 | 0.210 |
|       |            | Trend |    |          |       | 0.149 |          |       |
| CCL24 | rs2302004  | GG    | 48 | 6631±182 |       | 125   | 5562±138 |       |
|       |            | AG    | 46 | 6339±164 | 0.525 | 82    | 5368±126 | 0.613 |
|       |            | AA    | 9  | 6778±187 | 0.802 | 22    | 5677±129 | 0.419 |
|       |            | AA+AG | 55 | 6411±167 | 0.638 | 104   | 5434±127 | 0.894 |
|       |            | Trend |    |          |       | 0.865 |          |       |
| CCL26 | rs11465353 | AA    | 88 | 6614±172 |       | 183   | 5509±136 |       |
|       |            | AC    | 15 | 5927±180 | 0.102 | 46    | 5457±121 | 0.834 |
|       |            | CC    |    |          |       | 1     | 5500     | 0.001 |
|       |            | CC+AC | 15 | 5927±180 | 0.102 | 47    | 5457±120 | 0.794 |
|       |            | Trend |    |          |       | 0.102 |          |       |
| CCL26 | rs11465352 | CC    | 55 | 6547±190 |       | 132   | 5548±135 |       |
|       |            | AC    | 46 | 6500±158 | 0.473 | 81    | 5291±110 | 0.101 |
|       |            | AA    | 2  | 5900±990 | 0.814 | 16    | 6119±197 | 0.529 |
|       |            | AA+AC | 48 | 6475±155 | 0.466 | 97    | 5428±130 | 0.275 |
|       |            | Trend |    |          |       | 0.471 |          |       |
| CCL26 | rs2240478  | GG    | 44 | 6482±184 |       | 89    | 5596±139 |       |

|             |           |       |    |          |        |     |          |        |
|-------------|-----------|-------|----|----------|--------|-----|----------|--------|
|             |           | AG    | 45 | 6400±164 | 0.391  | 110 | 5384±126 | 0.649  |
|             |           | AA    | 14 | 6979±176 | 0.055  | 31  | 5629±138 | 0.883  |
|             |           | AA+AG | 59 | 6537±167 | 0.204  | 141 | 5438±129 | 0.754  |
|             |           | Trend |    |          | 0.082  |     |          | 0.965  |
| <i>CCL5</i> | rs4795095 | AA    | 57 | 6447±174 |        | 130 | 5408±133 |        |
|             |           | AG    | 38 | 6650±182 | 0.815  | 93  | 5659±132 | 0.272  |
|             |           | GG    | 8  | 6338±139 | 0.369  | 7   | 5043±123 | 0.232  |
|             |           | GG+AG | 46 | 6596±174 | 0.999  | 100 | 5616±132 | 0.393  |
|             |           | Trend |    |          | 0.737  |     |          | 0.703  |
| <i>CCL5</i> | rs2107538 | CC    | 45 | 6522±165 |        | 88  | 5320±123 |        |
|             |           | CT    | 42 | 6552±191 | 0.948  | 105 | 5726±140 | 0.055  |
|             |           | TT    | 16 | 6388±158 | 0.686  | 36  | 5156±104 | 0.987  |
|             |           | TT+CT | 58 | 6507±181 | 0.844  | 141 | 5580±134 | 0.126  |
|             |           | Trend |    |          | 0.735  |     |          | 0.505  |
| <i>CCR1</i> | rs3136673 | CC    | 93 | 6526±176 |        | 190 | 5491±135 |        |
|             |           | CT    | 10 | 6400±158 | 0.726  | 38  | 5545±122 | 0.569  |
|             |           | TT    |    |          |        | 2   | 5350±636 | 0.500  |
|             |           | TT+CT | 10 | 6400±158 | 0.726  | 40  | 5535±120 | 0.589  |
|             |           | Trend |    |          | 0.726  |     |          | 0.614  |
| <i>CCR1</i> | rs3136671 | CC    | 62 | 6698±169 |        | 146 | 5479±135 |        |
|             |           | CT    | 36 | 6072±163 | 0.240  | 75  | 5499±131 | 0.931  |
|             |           | TT    | 5  | 7400±261 | 0.428  | 9   | 5811±124 | 0.235  |
|             |           | TT+CT | 41 | 6234±178 | 0.423  | 84  | 5532±129 | 0.722  |
|             |           | Trend |    |          | 0.821  |     |          | 0.509  |
| <i>CCR1</i> | rs3181077 | TT    | 81 | 6542±175 |        | 178 | 5483±125 |        |
|             |           | CT    | 20 | 6275±175 | 0.324  | 50  | 5492±156 | 0.260  |
|             |           | CC    | 2  | 7750±636 | <0.001 | 1   | 8400     | <0.001 |
|             |           | CC+CT | 22 | 6409±173 | 0.575  | 51  | 5549±160 | 0.412  |
|             |           | Trend |    |          | 0.953  |     |          | 0.671  |
| <i>CCR3</i> | rs1979672 | AA    | 66 | 6370±171 |        | 136 | 5547±138 |        |
|             |           | AG    | 34 | 6871±180 | 0.425  | 82  | 5346±114 | 0.364  |
|             |           | GG    | 3  | 5633±126 | 0.029  | 12  | 5992±179 | 0.959  |
|             |           | GG+AG | 37 | 6770±178 | 0.619  | 94  | 5429±125 | 0.406  |
|             |           | Trend |    |          | 0.988  |     |          | 0.538  |
| <i>CCR3</i> | rs1979671 | TT    | 73 | 6486±173 |        | 172 | 5501±127 |        |
|             |           | CT    | 29 | 6521±179 | 0.789  | 55  | 5556±150 | 0.880  |
|             |           | CC    | 1  | 8300     | 0.729  | 3   | 4300±872 | 0.028  |
|             |           | CC+CT | 30 | 6580±179 | 0.803  | 58  | 5491±149 | 0.678  |
|             |           | Trend |    |          | 0.834  |     |          | 0.455  |
| <i>CCR3</i> | rs1388604 | TT    | 65 | 6403±170 |        | 142 | 5518±138 |        |
|             |           | AT    | 35 | 6771±183 | 0.608  | 76  | 5421±114 | 0.645  |
|             |           | AA    | 3  | 5900±127 | 0.370  | 12  | 5767±177 | 0.778  |
|             |           | AA+AT | 38 | 6703±180 | 0.723  | 88  | 5468±124 | 0.614  |
|             |           | Trend |    |          | 0.928  |     |          | 0.629  |
| <i>CCR3</i> | rs9842716 | GG    | 54 | 6380±173 |        | 110 | 5564±148 |        |
|             |           | AG    | 45 | 6724±179 | 0.616  | 101 | 5394±111 | 0.921  |
|             |           | AA    | 4  | 5950±104 | 0.474  | 19  | 5679±147 | 0.593  |
|             |           | AA+AG | 49 | 6661±175 | 0.710  | 120 | 5439±117 | 0.813  |
|             |           | Trend |    |          | 0.909  |     |          | 0.686  |

|      |            |       |    |          |        |     |          |       |
|------|------------|-------|----|----------|--------|-----|----------|-------|
| CCR3 | rs13073976 | TT    | 91 | 6512±176 |        | 198 | 5507±137 |       |
|      |            | CT    | 11 | 6364±156 | 0.902  | 30  | 5457±105 | 0.925 |
|      |            | CC    | 1  | 8300     | 0.652  | 2   | 5350±636 | 0.447 |
|      |            | CC+CT | 12 | 6525±159 | 0.856  | 32  | 5450±102 | 0.951 |
|      |            | Trend |    |          | 0.816  |     |          | 0.979 |
| CCR3 | rs6441948  | GG    | 81 | 6579±176 |        | 185 | 5545±135 |       |
|      |            | AG    | 21 | 6186±165 | 0.224  | 44  | 5323±124 | 0.104 |
|      |            | AA    | 1  | 8100     | <0.001 | 1   | 4700     | 0.008 |
|      |            | AA+AG | 22 | 6273±166 | 0.337  | 45  | 5309±123 | 0.095 |
|      |            | Trend |    |          | 0.541  |     |          | 0.082 |
| CCR3 | rs1907635  | CC    | 52 | 6483±170 |        | 94  | 5481±129 |       |
|      |            | CT    | 41 | 6610±189 | 0.892  | 119 | 5530±132 | 0.889 |
|      |            | TT    | 10 | 6280±132 | 0.182  | 17  | 5376±163 | 0.223 |
|      |            | TT+CT | 51 | 6545±179 | 0.842  | 136 | 5511±136 | 0.666 |
|      |            | Trend |    |          | 0.490  |     |          | 0.357 |
| CCR3 | rs13326331 | CC    | 39 | 6985±193 |        | 103 | 5351±114 |       |
|      |            | CT    | 52 | 6163±151 | 0.039  | 106 | 5610±147 | 0.073 |
|      |            | TT    | 12 | 6500±178 | 0.612  | 21  | 5657±138 | 0.260 |
|      |            | TT+CT | 64 | 6227±155 | 0.062  | 127 | 5618±145 | 0.049 |
|      |            | Trend |    |          | 0.216  |     |          | 0.069 |
| CCR3 | rs12489891 | GG    | 37 | 6495±172 |        | 71  | 5521±135 |       |
|      |            | CG    | 52 | 6512±188 | 0.636  | 129 | 5462±131 | 0.844 |
|      |            | CC    | 14 | 6571±127 | 0.689  | 30  | 5603±141 | 0.529 |
|      |            | CC+CG | 66 | 6524±176 | 0.614  | 159 | 5489±132 | 0.735 |
|      |            | Trend |    |          | 0.624  |     |          | 0.571 |
| CCR4 | rs2228428  | CC    | 97 | 6502±175 |        | 221 | 5510±132 |       |
|      |            | CT    | 6  | 6700±163 | 0.617  | 9   | 5211±147 | 0.536 |
| CCR4 | rs6770096  | CC    | 52 | 6467±182 |        | 123 | 5378±127 |       |
|      |            | CT    | 44 | 6557±166 | 0.813  | 91  | 5542±133 | 0.528 |
|      |            | TT    | 7  | 6586±182 | 0.537  | 16  | 6181±160 | 0.011 |
|      |            | TT+CT | 51 | 6561±166 | 0.712  | 107 | 5637±138 | 0.216 |
|      |            | Trend |    |          | 0.601  |     |          | 0.053 |
| CCR6 | rs9459883  | GG    | 71 | 6611±187 |        | 149 | 5484±128 |       |
|      |            | CG    | 29 | 6307±136 | 0.183  | 78  | 5545±140 | 0.866 |
|      |            | CC    | 3  | 6200±220 | 0.813  | 3   | 5033±202 | 0.441 |
|      |            | CC+CG | 32 | 6297±141 | 0.199  | 81  | 5526±142 | 0.984 |
|      |            | Trend |    |          | 0.283  |     |          | 0.858 |
| CCR6 | rs3093024  | GG    | 30 | 6280±138 |        | 82  | 5473±139 |       |
|      |            | AG    | 51 | 6459±181 | 0.806  | 114 | 5380±127 | 0.661 |
|      |            | AA    | 22 | 6959±198 | 0.250  | 34  | 5959±128 | 0.008 |
|      |            | AA+AG | 73 | 6610±186 | 0.515  | 148 | 5513±129 | 0.631 |
|      |            | Trend |    |          | 0.266  |     |          | 0.053 |
| CCR6 | rs1855025  | AA    | 42 | 6550±174 |        | 71  | 5701±129 |       |
|      |            | AG    | 42 | 6717±189 | 0.601  | 119 | 5457±140 | 0.209 |
|      |            | GG    | 19 | 5984±129 | 0.549  | 40  | 5263±112 | 0.030 |
|      |            | GG+AG | 61 | 6489±175 | 0.847  | 159 | 5408±134 | 0.086 |
|      |            | Trend |    |          | 0.733  |     |          | 0.030 |
| CCR6 | rs3798315  | CC    | 73 | 6421±178 |        | 168 | 5472±130 |       |
|      |            | CT    | 28 | 6768±169 | 0.561  | 54  | 5465±132 | 0.534 |

|      |           |       |    |          |       |     |          |        |
|------|-----------|-------|----|----------|-------|-----|----------|--------|
|      |           | TT    | 2  | 6350±919 | 0.166 | 7   | 6543±170 | 0.004  |
|      |           | TT+CT | 30 | 6740±164 | 0.649 | 61  | 5589±140 | 0.797  |
|      |           | Trend |    |          | 0.827 |     |          | 0.294  |
| CCR6 | rs3093012 | GG    | 55 | 6435±167 |       | 91  | 5560±136 |        |
|      |           | AG    | 42 | 6643±189 | 0.674 | 116 | 5472±127 | 0.837  |
|      |           | AA    | 6  | 6333±132 | 0.964 | 23  | 5391±149 | 0.999  |
|      |           | AA+AG | 48 | 6604±182 | 0.704 | 139 | 5458±131 | 0.857  |
|      |           | Trend |    |          | 0.783 |     |          | 0.917  |
| CCR6 | rs3093010 | CC    | 59 | 6576±166 |       | 127 | 5510±131 |        |
|      |           | AC    | 35 | 6294±192 | 0.333 | 93  | 5565±133 | 0.918  |
|      |           | AA    | 9  | 6956±154 | 0.266 | 10  | 4740±145 | 0.080  |
|      |           | AA+AC | 44 | 6430±185 | 0.612 | 103 | 5484±135 | 0.680  |
|      |           | Trend |    |          | 0.872 |     |          | 0.312  |
| CCR6 | rs3093009 | AA    | 68 | 6446±176 |       | 173 | 5546±136 |        |
|      |           | AG    | 27 | 6478±168 | 0.835 | 54  | 5372±122 | 0.740  |
|      |           | GG    | 2  | 6900±141 | 0.881 |     |          |        |
|      |           | GG+AG | 29 | 6507±164 | 0.829 | 54  | 5372±122 | 0.740  |
|      |           | Trend |    |          | 0.823 |     |          | 0.740  |
| CCR6 | rs3093007 | TT    | 89 | 6587±178 |       | 211 | 5483±133 |        |
|      |           | CT    | 9  | 6233±149 | 0.159 | 19  | 5674±128 | 0.323  |
|      |           | CC    | 5  | 5720±126 | 0.003 |     |          |        |
|      |           | CC+CT | 14 | 6050±139 | 0.016 | 19  | 5674±128 | 0.323  |
|      |           | Trend |    |          | 0.003 |     |          | 0.323  |
| CCR6 | rs3093003 | GG    | 89 | 6449±176 |       | 206 | 5516±133 |        |
|      |           | AG    | 13 | 7000±164 | 0.071 | 24  | 5350±131 | 0.715  |
|      |           | AA    | 1  | 5900     | 0.515 |     |          |        |
|      |           | AA+AG | 14 | 6921±160 | 0.087 | 24  | 5350±131 | 0.715  |
|      |           | Trend |    |          | 0.141 |     |          | 0.715  |
| CCR6 | rs3093002 | GG    | 56 | 6446±169 |       | 80  | 5598±136 |        |
|      |           | AG    | 28 | 6418±164 | 0.845 | 107 | 5344±124 | 0.141  |
|      |           | AA    | 19 | 6853±205 | 0.464 | 42  | 5605±134 | 0.975  |
|      |           | AA+AG | 47 | 6594±181 | 0.592 | 149 | 5417±127 | 0.267  |
|      |           | Trend |    |          | 0.489 |     |          | 0.734  |
| CCR6 | rs367523  | GG    | 30 | 6733±195 |       | 55  | 5496±141 |        |
|      |           | CG    | 47 | 6596±153 | 0.808 | 119 | 5460±121 | 0.592  |
|      |           | CC    | 26 | 6112±183 | 0.241 | 55  | 5607±149 | 0.571  |
|      |           | CC+CG | 73 | 6423±165 | 0.455 | 174 | 5506±130 | 0.896  |
|      |           | Trend |    |          | 0.245 |     |          | 0.572  |
| CCR7 | rs2023906 | AA    | 93 | 6426±162 |       | 194 | 5548±136 |        |
|      |           | AG    | 10 | 7330±256 | 0.194 | 35  | 5206±110 | 0.109  |
|      |           | GG    |    |          |       | 1   | 6100     | <0.001 |
|      |           | GG+AG | 10 | 7330±256 | 0.194 | 36  | 5231±109 | 0.136  |
|      |           | Trend |    |          | 0.194 |     |          | 0.195  |
| CCR7 | rs588019  | GG    | 85 | 6340±165 |       | 210 | 5484±135 |        |
|      |           | AG    | 18 | 7333±195 | 0.073 | 19  | 5726±103 | 0.137  |
| CCR7 | rs2290065 | GG    | 50 | 6798±167 |       | 106 | 5433±138 |        |
|      |           | AG    | 44 | 6405±185 | 0.171 | 99  | 5495±127 | 0.888  |
|      |           | AA    | 9  | 5467±108 | 0.009 | 24  | 5854±133 | 0.065  |
|      |           | AA+AG | 53 | 6245±177 | 0.060 | 123 | 5565±128 | 0.433  |

|      |            |       |    |          |       |     |          |       |
|------|------------|-------|----|----------|-------|-----|----------|-------|
|      |            | Trend |    |          | 0.012 |     |          | 0.144 |
| CCR7 | rs3136685  | CC    | 45 | 6602±154 |       | 85  | 5681±153 |       |
|      |            | CT    | 46 | 6643±187 | 0.843 | 116 | 5249±113 | 0.035 |
|      |            | TT    | 12 | 5683±182 | 0.190 | 29  | 5962±126 | 0.105 |
|      |            | TT+CT | 58 | 6445±189 | 0.514 | 145 | 5392±119 | 0.198 |
|      |            | Trend |    |          | 0.263 |     |          | 0.804 |
| CCR8 | rs872066   | AA    | 88 | 6515±171 |       | 189 | 5479±134 |       |
|      |            | AG    | 8  | 5938±190 | 0.164 | 34  | 5724±131 | 0.304 |
|      |            | GG    | 7  | 7157±190 | 0.486 | 6   | 5050±850 | 0.855 |
|      |            | GG+AG | 15 | 6507±193 | 0.601 | 40  | 5623±126 | 0.366 |
|      |            | Trend |    |          | 0.991 |     |          | 0.486 |
| CCR9 | rs9842595  | GG    | 97 | 6493±175 |       | 218 | 5527±130 |       |
|      |            | GT    | 5  | 6740±172 | 0.842 | 12  | 4983±174 | 0.238 |
| CCR9 | rs1860264  | AA    | 32 | 6959±175 |       | 77  | 5664±131 |       |
|      |            | AC    | 51 | 6257±178 | 0.063 | 115 | 5536±143 | 0.412 |
|      |            | CC    | 20 | 6455±153 | 0.451 | 37  | 5073±899 | 0.051 |
|      |            | CC+AC | 71 | 6313±171 | 0.085 | 152 | 5423±133 | 0.206 |
|      |            | Trend |    |          | 0.335 |     |          | 0.067 |
| CCR9 | rs9868455  | TT    | 32 | 6959±175 |       | 78  | 5663±131 |       |
|      |            | CT    | 51 | 6257±178 | 0.063 | 114 | 5535±143 | 0.409 |
|      |            | CC    | 20 | 6455±153 | 0.451 | 37  | 5073±899 | 0.051 |
|      |            | CC+CT | 71 | 6313±171 | 0.085 | 151 | 5422±133 | 0.203 |
|      |            | Trend |    |          | 0.335 |     |          | 0.066 |
| CCR9 | rs6441929  | AA    | 42 | 6657±173 |       | 93  | 5595±129 |       |
|      |            | AG    | 43 | 6423±185 | 0.515 | 110 | 5501±144 | 0.797 |
|      |            | GG    | 18 | 6394±152 | 0.932 | 26  | 5192±884 | 0.441 |
|      |            | GG+AG | 61 | 6415±175 | 0.589 | 136 | 5442±136 | 0.688 |
|      |            | Trend |    |          | 0.799 |     |          | 0.528 |
| CCR9 | rs12638201 | GG    | 91 | 6593±176 |       | 202 | 5560±135 |       |
|      |            | AG    | 12 | 5908±145 | 0.168 | 26  | 5050±106 | 0.012 |
| CCR9 | rs2236938  | GG    | 44 | 6682±171 |       | 99  | 5535±137 |       |
|      |            | AG    | 44 | 6377±186 | 0.486 | 109 | 5539±135 | 0.948 |
|      |            | AA    | 15 | 6420±150 | 0.906 | 21  | 5176±905 | 0.550 |
|      |            | AA+AG | 59 | 6388±176 | 0.547 | 130 | 5480±129 | 0.945 |
|      |            | Trend |    |          | 0.741 |     |          | 0.748 |
| CCR9 | rs7614342  | AA    | 32 | 6819±162 |       | 82  | 5598±142 |       |
|      |            | AT    | 48 | 6375±195 | 0.219 | 114 | 5563±135 | 0.651 |
|      |            | TT    | 23 | 6378±139 | 0.366 | 32  | 5044±912 | 0.078 |
|      |            | TT+AT | 71 | 6376±178 | 0.194 | 146 | 5449±128 | 0.385 |
|      |            | Trend |    |          | 0.331 |     |          | 0.132 |
| CCR9 | rs875890   | TT    | 39 | 6859±167 |       | 81  | 5598±143 |       |
|      |            | AT    | 47 | 6236±185 | 0.127 | 115 | 5563±134 | 0.655 |
|      |            | AA    | 17 | 6488±151 | 0.635 | 32  | 5044±912 | 0.079 |
|      |            | AA+AT | 64 | 6303±176 | 0.159 | 147 | 5450±128 | 0.390 |
|      |            | Trend |    |          | 0.420 |     |          | 0.134 |
| CCR9 | rs4683147  | AA    | 31 | 7016±175 |       | 73  | 5671±133 |       |
|      |            | AG    | 51 | 6204±177 | 0.039 | 118 | 5535±142 | 0.310 |
|      |            | GG    | 21 | 6524±152 | 0.369 | 38  | 5087±891 | 0.042 |
|      |            | GG+AG | 72 | 6297±170 | 0.055 | 156 | 5426±132 | 0.150 |
|      |            |       |    |          |       |     |          |       |

|                |            |       |    |          |        |     |          |       |
|----------------|------------|-------|----|----------|--------|-----|----------|-------|
|                |            | Trend |    |          | 0.290  |     |          | 0.050 |
| <i>CD14</i>    | rs4914     | CC    | 98 | 6524±176 |        | 213 | 5537±132 |       |
|                |            | CG    | 5  | 6300±133 | 0.777  | 17  | 5024±129 | 0.198 |
| <i>CD14</i>    | rs2569190  | AA    | 43 | 6393±149 |        | 91  | 5736±140 |       |
|                |            | AG    | 47 | 6504±198 | 0.156  | 88  | 5336±117 | 0.081 |
|                |            | GG    | 13 | 6946±160 | 0.036  | 51  | 5355±140 | 0.098 |
|                |            | GG+AG | 60 | 6600±190 | 0.070  | 139 | 5343±125 | 0.044 |
|                |            | Trend |    |          | 0.028  |     |          | 0.072 |
| <i>PRO1580</i> | rs3822356  | AA    | 59 | 6492±171 |        | 126 | 5582±138 |       |
|                |            | AG    | 33 | 6409±189 | 0.658  | 81  | 5362±117 | 0.253 |
|                |            | GG    | 11 | 6945±150 | 0.100  | 21  | 5314±130 | 0.277 |
|                |            | GG+AG | 44 | 6543±180 | 0.362  | 102 | 5352±119 | 0.172 |
|                |            | Trend |    |          | 0.167  |     |          | 0.156 |
| <i>CD180</i>   | rs1560160  | GG    | 42 | 6545±164 |        | 81  | 5256±122 |       |
|                |            | GT    | 49 | 6420±163 | 0.677  | 115 | 5642±134 | 0.110 |
|                |            | TT    | 12 | 6783±250 | 0.840  | 33  | 5633±149 | 0.277 |
|                |            | TT+GT | 61 | 6492±181 | 0.795  | 148 | 5640±137 | 0.093 |
|                |            | Trend |    |          | 0.994  |     |          | 0.157 |
| <i>CD180</i>   | rs6890674  | TT    | 67 | 6445±160 |        | 149 | 5539±136 |       |
|                |            | AT    | 33 | 6582±205 | 0.784  | 73  | 5371±119 | 0.568 |
|                |            | AA    | 3  | 7300±105 | 0.052  | 8   | 5913±189 | 0.515 |
|                |            | AA+AT | 36 | 6642±199 | 0.646  | 81  | 5425±127 | 0.764 |
|                |            | Trend |    |          | 0.458  |     |          | 0.979 |
| <i>CD180</i>   | rs1697143  | GG    | 79 | 6559±181 |        | 173 | 5411±126 |       |
|                |            | GT    | 23 | 6217±133 | 0.260  | 51  | 5710±146 | 0.265 |
|                |            | TT    | 1  | 9700     | <0.001 | 5   | 6620±171 | 0.080 |
|                |            | TT+GT | 24 | 6363±148 | 0.529  | 56  | 5791±149 | 0.143 |
|                |            | Trend |    |          | 0.909  |     |          | 0.077 |
| <i>CD180</i>   | rs1428469  | TT    | 62 | 6461±162 |        | 127 | 5501±135 |       |
|                |            | CT    | 31 | 6406±199 | 0.790  | 89  | 5498±126 | 0.973 |
|                |            | CC    | 10 | 7170±160 | 0.194  | 14  | 5486±158 | 0.977 |
|                |            | CC+CT | 41 | 6593±191 | 0.839  | 103 | 5496±130 | 0.968 |
|                |            | Trend |    |          | 0.476  |     |          | 0.967 |
| <i>CD180</i>   | rs3756561  | CC    | 72 | 6401±160 |        | 147 | 5538±134 |       |
|                |            | CT    | 26 | 6677±206 | 0.624  | 73  | 5389±125 | 0.524 |
|                |            | TT    | 5  | 7280±188 | 0.259  | 9   | 5800±180 | 0.556 |
|                |            | TT+CT | 31 | 6774±201 | 0.437  | 82  | 5434±131 | 0.700 |
|                |            | Trend |    |          | 0.302  |     |          | 0.954 |
| <i>CD180</i>   | rs1697142  | TT    | 43 | 6405±176 |        | 82  | 5272±127 |       |
|                |            | CT    | 43 | 6547±166 | 0.844  | 103 | 5615±133 | 0.125 |
|                |            | CC    | 17 | 6706±194 | 0.838  | 44  | 5677±140 | 0.119 |
|                |            | CC+CT | 60 | 6592±173 | 0.820  | 147 | 5633±135 | 0.070 |
|                |            | Trend |    |          | 0.819  |     |          | 0.083 |
| <i>CD180</i>   | rs10058233 | TT    | 46 | 6535±191 |        | 93  | 5258±131 |       |
|                |            | CT    | 44 | 6461±158 | 0.634  | 108 | 5631±129 | 0.031 |
|                |            | CC    | 13 | 6615±173 | 0.856  | 28  | 5829±143 | 0.082 |
|                |            | CC+CT | 57 | 6496±160 | 0.650  | 136 | 5672±132 | 0.016 |
|                |            | Trend |    |          | 0.736  |     |          | 0.022 |
| <i>CD180</i>   | rs1705392  | CC    | 42 | 6231±165 |        | 78  | 5281±128 |       |

|       |            |       |    |          |        |     |          |       |
|-------|------------|-------|----|----------|--------|-----|----------|-------|
|       |            | CG    | 44 | 6673±177 | 0.379  | 107 | 5595±132 | 0.182 |
|       |            | GG    | 17 | 6800±188 | 0.445  | 44  | 5677±140 | 0.140 |
|       |            | GG+CG | 61 | 6708±178 | 0.331  | 151 | 5619±134 | 0.109 |
|       |            | Trend |    |          | 0.363  |     |          | 0.111 |
| CD180 | rs10223101 | CC    | 76 | 6599±186 |        | 167 | 5468±135 |       |
|       |            | CT    | 25 | 6168±116 | 0.270  | 53  | 5375±112 | 0.471 |
|       |            | TT    | 2  | 7600±297 | 0.579  | 9   | 6933±131 | 0.001 |
|       |            | TT+CT | 27 | 6274±131 | 0.415  | 62  | 5602±127 | 0.610 |
|       |            | Trend |    |          | 0.692  |     |          | 0.144 |
| CD209 | rs8112310  | TT    | 54 | 6619±174 |        | 107 | 5423±125 |       |
|       |            | AT    | 36 | 6322±174 | 0.954  | 101 | 5580±146 | 0.329 |
|       |            | AA    | 13 | 6608±183 | 0.995  | 21  | 5471±108 | 0.377 |
|       |            | AA+AT | 49 | 6398±174 | 0.968  | 122 | 5561±140 | 0.266 |
|       |            | Trend |    |          | 0.989  |     |          | 0.251 |
| CD209 | rs4804802  | GG    | 64 | 6688±180 |        | 119 | 5504±122 |       |
|       |            | AG    | 25 | 6216±157 | 0.512  | 92  | 5468±152 | 0.621 |
|       |            | AA    | 11 | 6145±192 | 0.426  | 18  | 5683±984 | 0.272 |
|       |            | AA+AG | 36 | 6194±166 | 0.357  | 110 | 5504±144 | 0.897 |
|       |            | Trend |    |          | 0.361  |     |          | 0.694 |
| CD209 | rs8105483  | CC    | 88 | 6433±174 |        | 189 | 5574±138 |       |
|       |            | CG    | 14 | 6793±157 | 0.569  | 41  | 5154±101 | 0.093 |
|       |            | GG    | 1  | 9700     | <0.001 |     |          |       |
|       |            | GG+CG | 15 | 6987±169 | 0.344  | 41  | 5154±101 | 0.093 |
|       |            | Trend |    |          | 0.189  |     |          | 0.093 |
| CD209 | rs2287886  | AA    | 55 | 6407±154 |        | 90  | 5466±122 |       |
|       |            | AG    | 35 | 6649±212 | 0.359  | 116 | 5469±142 | 0.407 |
|       |            | GG    | 13 | 6600±146 | 0.940  | 24  | 5767±125 | 0.746 |
|       |            | GG+AG | 48 | 6635±194 | 0.431  | 140 | 5520±139 | 0.525 |
|       |            | Trend |    |          | 0.593  |     |          | 0.854 |
| CD209 | rs735240   | GG    | 61 | 6521±162 |        | 121 | 5364±120 |       |
|       |            | AG    | 36 | 6583±202 | 0.885  | 87  | 5697±146 | 0.417 |
|       |            | AA    | 6  | 6017±109 | 0.584  | 20  | 5600±139 | 0.947 |
|       |            | AA+AG | 42 | 6502±192 | 0.978  | 107 | 5679±144 | 0.485 |
|       |            | Trend |    |          | 0.878  |     |          | 0.668 |
| CD209 | rs11881682 | GG    | 90 | 6463±175 |        | 192 | 5544±137 |       |
|       |            | AG    | 10 | 6500±149 | 0.999  | 36  | 5194±104 | 0.280 |
|       |            | AA    | 1  | 9700     | <0.001 |     |          |       |
|       |            | AA+AG | 11 | 6791±171 | 0.608  | 36  | 5194±104 | 0.280 |
|       |            | Trend |    |          | 0.348  |     |          | 0.280 |
| CD209 | rs4804805  | AA    | 84 | 6567±174 |        | 191 | 5439±131 |       |
|       |            | AG    | 14 | 6414±196 | 0.933  | 37  | 5819±143 | 0.145 |
|       |            | GG    | 5  | 5900±106 | 0.228  | 1   | 4800     | 0.200 |
|       |            | GG+AG | 19 | 6279±175 | 0.784  | 38  | 5792±142 | 0.153 |
|       |            | Trend |    |          | 0.553  |     |          | 0.171 |
| CD209 | rs4804806  | GG    | 82 | 6474±175 |        | 172 | 5457±125 |       |
|       |            | AG    | 21 | 6667±172 | 0.872  | 56  | 5648±156 | 0.279 |
|       |            | AA    |    |          |        | 2   | 4900±141 | 0.120 |
|       |            | AA+AG | 21 | 6667±172 | 0.872  | 58  | 5622±154 | 0.303 |
|       |            | Trend |    |          | 0.872  |     |          | 0.349 |



|               |            |       |    |          |       |     |          |        |
|---------------|------------|-------|----|----------|-------|-----|----------|--------|
| <i>SECTM1</i> | rs4452007  | TT    | 96 | 6580±175 |       | 216 | 5511±134 |        |
|               |            | CT    | 7  | 5600±139 | 0.111 | 12  | 5350±105 | 0.678  |
| <i>SECTM1</i> | rs6502097  | GG    | 85 | 6564±172 |       | 184 | 5541±137 |        |
|               |            | CG    | 18 | 6278±186 | 0.323 | 43  | 5435±110 | 0.943  |
|               |            | CC    |    |          |       | 3   | 3800±624 | 0.002  |
|               |            | CC+CG | 18 | 6278±186 | 0.323 | 46  | 5328±115 | 0.608  |
|               |            | Trend |    |          | 0.323 |     |          | 0.306  |
| <i>SECTM1</i> | rs4789763  | GG    | 44 | 6623±181 |       | 80  | 5484±147 |        |
|               |            | AG    | 41 | 6585±177 | 0.740 | 115 | 5563±121 | 0.210  |
|               |            | AA    | 17 | 6171±149 | 0.312 | 34  | 5350±137 | 0.922  |
|               |            | AA+AG | 58 | 6464±169 | 0.491 | 149 | 5515±125 | 0.334  |
|               |            | Trend |    |          | 0.335 |     |          | 0.768  |
| <i>SECTM1</i> | rs12450996 | GG    | 57 | 6677±181 |       | 109 | 5610±140 |        |
|               |            | AG    | 38 | 6418±171 | 0.591 | 104 | 5346±118 | 0.105  |
|               |            | AA    | 8  | 5800±123 | 0.153 | 16  | 5806±161 | 0.687  |
|               |            | AA+AG | 46 | 6311±164 | 0.378 | 120 | 5408±125 | 0.201  |
|               |            | Trend |    |          | 0.212 |     |          | 0.569  |
| <i>CENTA1</i> | rs10279968 | CC    | 60 | 6293±171 |       | 121 | 5468±126 |        |
|               |            | CG    | 37 | 6886±185 | 0.111 | 100 | 5525±142 | 0.826  |
|               |            | GG    | 6  | 6417±804 | 0.440 | 6   | 5867±157 | 0.549  |
|               |            | GG+CG | 43 | 6821±174 | 0.107 | 106 | 5544±142 | 0.736  |
|               |            | Trend |    |          | 0.124 |     |          | 0.620  |
| <i>CLCA2</i>  | rs12728761 | GG    | 92 | 6386±155 |       | 197 | 5572±131 |        |
|               |            | CG    | 11 | 7582±275 | 0.219 | 30  | 5117±139 | 0.040  |
|               |            | CC    |    |          |       | 3   | 4500±265 | <0.001 |
|               |            | CC+CG | 11 | 7582±275 | 0.219 | 33  | 5061±133 | 0.024  |
|               |            | Trend |    |          |       |     | 0.014    |        |
| <i>CLCA1</i>  | rs4393129  | TT    | 38 | 6558±203 |       | 96  | 5371±129 |        |
|               |            | CT    | 53 | 6664±154 | 0.549 | 108 | 5534±125 | 0.638  |
|               |            | CC    | 12 | 5708±143 | 0.158 | 26  | 5823±170 | 0.345  |
|               |            | CC+CT | 65 | 6488±156 | 0.896 | 134 | 5590±135 | 0.482  |
|               |            | Trend |    |          | 0.466 |     |          | 0.357  |
| <i>CLCA1</i>  | rs3753276  | TT    | 87 | 6384±158 |       | 196 | 5558±130 |        |
|               |            | CT    | 16 | 7219±237 | 0.277 | 31  | 5223±148 | 0.131  |
|               |            | CC    |    |          |       | 3   | 4500±265 | <0.001 |
|               |            | CC+CT | 16 | 7219±237 | 0.277 | 34  | 5159±143 | 0.088  |
|               |            | Trend |    |          | 0.277 |     |          | 0.055  |
| <i>CLCA1</i>  | rs2791519  | GG    | 34 | 6550±157 |       | 68  | 5890±148 |        |
|               |            | GT    | 48 | 6448±190 | 0.851 | 107 | 5281±121 | 0.030  |
|               |            | TT    | 21 | 6605±168 | 0.627 | 55  | 5438±126 | 0.391  |
|               |            | TT+GT | 69 | 6496±183 | 0.938 | 162 | 5335±122 | 0.054  |
|               |            | Trend |    |          | 0.676 |     |          | 0.330  |
| <i>CLCA1</i>  | rs1358826  | CC    | 39 | 6605±189 |       | 89  | 5260±130 |        |
|               |            | CT    | 51 | 6643±165 | 0.915 | 113 | 5613±121 | 0.078  |
|               |            | TT    | 13 | 5731±147 | 0.045 | 28  | 5796±172 | 0.247  |
|               |            | TT+CT | 64 | 6458±165 | 0.634 | 141 | 5650±132 | 0.067  |
|               |            | Trend |    |          | 0.167 |     |          | 0.107  |
| <i>CLCA1</i>  | rs2753377  | AA    | 79 | 6343±166 |       | 168 | 5495±131 |        |
|               |            | AT    | 24 | 7075±190 | 0.186 | 56  | 5411±138 | 0.245  |

|       |           |       |    |          |       |     |          |        |
|-------|-----------|-------|----|----------|-------|-----|----------|--------|
|       |           | TT    |    |          |       | 6   | 6433±128 | 0.005  |
|       |           | TT+AT | 24 | 7075±190 | 0.186 | 62  | 5510±139 | 0.628  |
|       |           | Trend |    |          | 0.186 |     |          | 0.800  |
| CLCA1 | rs2753384 | CC    | 42 | 6762±193 |       | 94  | 5262±129 |        |
|       |           | CT    | 50 | 6528±156 | 0.486 | 110 | 5537±120 | 0.156  |
|       |           | TT    | 11 | 5500±147 | 0.010 | 25  | 6268±170 | 0.011  |
|       |           | TT+CT | 61 | 6343±158 | 0.203 | 135 | 5673±133 | 0.051  |
|       |           | Trend |    |          | 0.038 |     |          | 0.012  |
| CLCA1 | rs926065  | TT    | 82 | 6376±161 |       | 191 | 5573±132 |        |
|       |           | GT    | 21 | 7052±211 | 0.208 | 36  | 5200±135 | 0.101  |
|       |           | GG    |    |          |       | 2   | 4400±283 | <0.001 |
|       |           | GG+GT | 21 | 7052±211 | 0.208 | 38  | 5158±132 | 0.077  |
|       |           | Trend |    |          | 0.208 |     |          | 0.055  |
| CLCA1 | rs3765989 | AA    | 81 | 6377±167 |       | 176 | 5472±130 |        |
|       |           | AT    | 22 | 7018±193 | 0.252 | 48  | 5479±140 | 0.452  |
|       |           | TT    |    |          |       | 6   | 6433±128 | 0.004  |
|       |           | TT+AT | 22 | 7018±193 | 0.252 | 54  | 5585±141 | 0.971  |
|       |           | Trend |    |          | 0.252 |     |          | 0.509  |
| CLCA1 | rs2734690 | GG    | 28 | 6532±176 |       | 69  | 5946±158 |        |
|       |           | AG    | 51 | 6755±179 | 0.261 | 99  | 5292±113 | 0.027  |
|       |           | AA    | 24 | 5979±154 | 0.468 | 62  | 5331±120 | 0.141  |
|       |           | AA+AG | 75 | 6507±174 | 0.627 | 161 | 5307±116 | 0.032  |
|       |           | Trend |    |          | 0.488 |     |          | 0.132  |
| CLCA1 | rs1321695 | CC    | 28 | 6532±176 |       | 68  | 5953±159 |        |
|       |           | AC    | 52 | 6744±177 | 0.278 | 99  | 5294±113 | 0.028  |
|       |           | AA    | 23 | 5970±157 | 0.473 | 63  | 5330±119 | 0.146  |
|       |           | AA+AC | 75 | 6507±174 | 0.627 | 162 | 5308±115 | 0.034  |
|       |           | Trend |    |          | 0.507 |     |          | 0.139  |
| CLCA1 | rs2734697 | TT    | 36 | 6461±169 |       | 87  | 5347±124 |        |
|       |           | AT    | 50 | 6606±188 | 0.612 | 108 | 5515±124 | 0.662  |
|       |           | AA    | 17 | 6353±143 | 0.658 | 35  | 5826±171 | 0.657  |
|       |           | AA+AT | 67 | 6542±177 | 0.794 | 143 | 5591±137 | 0.611  |
|       |           | Trend |    |          | 0.862 |     |          | 0.615  |
| CLCA1 | rs2734700 | AA    | 51 | 6549±167 |       | 115 | 5433±134 |        |
|       |           | AG    | 38 | 6208±145 | 0.691 | 92  | 5597±138 | 0.890  |
|       |           | GG    | 14 | 7214±248 | 0.558 | 23  | 5435±103 | 0.978  |
|       |           | GG+AG | 52 | 6479±182 | 0.987 | 115 | 5564±132 | 0.899  |
|       |           | Trend |    |          | 0.701 |     |          | 0.927  |
| CLCA1 | rs2734704 | GG    | 64 | 6530±165 |       | 158 | 5477±132 |        |
|       |           | AG    | 32 | 6284±156 | 0.695 | 62  | 5581±142 | 0.721  |
|       |           | AA    | 7  | 7414±295 | 0.729 | 10  | 5340±755 | 0.707  |
|       |           | AA+AG | 39 | 6487±189 | 0.902 | 72  | 5547±135 | 0.678  |
|       |           | Trend |    |          | 0.912 |     |          | 0.642  |
| CLCA1 | rs2791494 | CC    | 84 | 6443±167 |       | 201 | 5521±133 |        |
|       |           | CT    | 18 | 6761±205 | 0.377 | 28  | 5379±132 | 0.706  |
| CLCA1 | rs1321690 | AA    | 40 | 6553±157 |       | 118 | 5373±111 |        |
|       |           | AC    | 37 | 6324±172 | 0.582 | 93  | 5526±149 | 0.543  |
|       |           | CC    | 26 | 6723±202 | 0.929 | 17  | 5959±137 | 0.052  |
|       |           | CC+AC | 63 | 6489±184 | 0.760 | 110 | 5593±147 | 0.286  |

|                |            |       |    |          |        |       |          |        |
|----------------|------------|-------|----|----------|--------|-------|----------|--------|
|                |            | Trend |    |          | 0.988  |       |          | 0.105  |
| <i>CLCA1</i>   | rs2791491  | GG    | 75 | 6729±181 |        | 164   | 5535±139 |        |
|                |            | GT    | 27 | 5830±130 | 0.020  | 61    | 5425±119 | 0.530  |
|                |            | TT    | 1  | 8800     | <0.001 | 5     | 5200±954 | 0.218  |
|                |            | TT+GT | 28 | 5936±139 | 0.067  | 66    | 5408±117 | 0.398  |
|                |            | Trend |    |          |        | 0.255 |          |        |
| <i>CLCA1</i>   | rs2246583  | GG    | 45 | 6696±162 |        | 119   | 5376±111 |        |
|                |            | CG    | 50 | 6316±169 | 0.220  | 95    | 5602±157 | 0.330  |
|                |            | CC    | 8  | 6725±263 | 0.754  | 16    | 5794±123 | 0.116  |
|                |            | CC+CG | 58 | 6372±182 | 0.240  | 111   | 5630±152 | 0.206  |
|                |            | Trend |    |          |        | 0.387 |          |        |
| <i>CLCA1</i>   | rs17129266 | GG    | 61 | 6726±156 |        | 140   | 5381±117 |        |
|                |            | CG    | 40 | 6188±197 | 0.025  | 80    | 5618±155 | 0.312  |
|                |            | CC    | 2  | 6550±148 | 0.424  | 10    | 6190±132 | 0.022  |
|                |            | CC+CG | 42 | 6205±194 | 0.023  | 90    | 5681±153 | 0.155  |
|                |            | Trend |    |          |        | 0.025 |          |        |
| <i>CNTNAP1</i> | rs4028634  | TT    | 33 | 6530±200 |        | 71    | 5393±111 |        |
|                |            | CT    | 57 | 6389±164 | 0.616  | 115   | 5378±131 | 0.682  |
|                |            | CC    | 13 | 7015±143 | 0.399  | 44    | 5984±158 | 0.118  |
|                |            | CC+CT | 70 | 6506±162 | 0.848  | 159   | 5546±141 | 0.690  |
|                |            | Trend |    |          |        | 0.708 |          |        |
| <i>CNTNAP1</i> | rs3760386  | GG    | 32 | 6419±201 |        | 68    | 5435±113 |        |
|                |            | AG    | 53 | 6492±165 | 0.775  | 112   | 5381±131 | 0.787  |
|                |            | AA    | 18 | 6744±154 | 0.707  | 50    | 5848±156 | 0.303  |
|                |            | AA+AG | 71 | 6556±161 | 0.723  | 162   | 5525±140 | 0.782  |
|                |            | Trend |    |          |        | 0.696 |          |        |
| <i>CRP</i>     | rs3093077  | AA    | 76 | 6486±152 |        | 158   | 5575±138 |        |
|                |            | AC    | 26 | 6565±231 | 0.963  | 61    | 5393±113 | 0.646  |
|                |            | CC    | 1  | 7300     | 0.005  | 11    | 4991±155 | 0.379  |
|                |            | CC+AC | 27 | 6593±227 | 0.987  | 72    | 5332±120 | 0.436  |
|                |            | Trend |    |          |        | 0.917 |          |        |
| <i>CRP</i>     | rs2808630  | TT    | 71 | 6463±178 |        | 149   | 5478±130 |        |
|                |            | CT    | 29 | 6597±173 | 0.647  | 79    | 5554±139 | 0.849  |
|                |            | CC    | 3  | 6900±889 | 0.757  | 2     | 4850±71  | 0.006  |
|                |            | CC+CT | 32 | 6625±166 | 0.643  | 81    | 5537±138 | 0.941  |
|                |            | Trend |    |          |        | 0.641 |          |        |
| <i>CRP</i>     | rs1205     | TT    | 36 | 6528±148 |        | 72    | 5461±124 |        |
|                |            | CT    | 47 | 6385±177 | 0.444  | 110   | 5695±142 | 0.500  |
|                |            | CC    | 20 | 6790±211 | 0.948  | 48    | 5106±115 | 0.136  |
|                |            | CC+CT | 67 | 6506±187 | 0.530  | 158   | 5516±137 | 0.943  |
|                |            | Trend |    |          |        | 0.835 |          |        |
| <i>CRP</i>     | rs1800947  | CC    | 98 | 6487±174 |        | 218   | 5477±134 |        |
|                |            | CG    | 5  | 7040±185 | 0.176  | 12    | 5900±111 | 0.003  |
| <i>CRP</i>     | rs1417938  | TT    | 86 | 6581±163 |        | 207   | 5508±135 |        |
|                |            | AT    | 16 | 6019±220 | 0.264  | 22    | 5491±107 | 0.693  |
|                |            | AA    | 1  | 8600     |        | 1     | 3700     | <0.001 |
|                |            | AA+AT | 17 | 6171±222 | 0.264  | 23    | 5413±111 | 0.482  |
|                |            | Trend |    |          |        | 0.264 |          |        |
| <i>CTNNB1</i>  | rs13072632 | TT    | 59 | 6359±165 |        | 148   | 5388±139 |        |

|                |            |       |    |          |        |     |          |        |
|----------------|------------|-------|----|----------|--------|-----|----------|--------|
|                |            | CT    | 35 | 6846±185 | 0.118  | 70  | 5673±108 | 0.067  |
|                |            | CC    | 9  | 6233±181 | 0.798  | 11  | 5991±170 | 0.183  |
|                |            | CC+CT | 44 | 6720±184 | 0.217  | 81  | 5716±117 | 0.032  |
|                |            | Trend |    |          | 0.490  |     |          | 0.034  |
| <i>CTNNB1</i>  | rs4135385  | GG    | 28 | 6932±179 |        | 60  | 5387±126 |        |
|                |            | AG    | 48 | 6440±187 | 0.337  | 119 | 5596±132 | 0.237  |
|                |            | AA    | 26 | 6238±140 | 0.297  | 50  | 5396±143 | 0.894  |
|                |            | AA+AG | 74 | 6369±171 | 0.272  | 169 | 5537±135 | 0.353  |
|                |            | Trend |    |          | 0.290  |     |          | 0.828  |
| <i>IL17C</i>   | rs2254073  | CC    | 56 | 6423±171 |        | 152 | 5568±127 |        |
|                |            | CT    | 46 | 6639±179 | 0.245  | 68  | 5456±146 | 0.278  |
|                |            | TT    | 1  | 5800     | 0.228  | 9   | 4756±104 | 0.056  |
|                |            | TT+CT | 47 | 6621±178 | 0.264  | 77  | 5374±143 | 0.112  |
|                |            | Trend |    |          | 0.305  |     |          | 0.052  |
| <i>CYBA</i>    | rs12709102 | TT    | 60 | 6677±181 |        | 127 | 5598±118 |        |
|                |            | CT    | 37 | 6295±165 | 0.245  | 86  | 5502±154 | 0.581  |
|                |            | CC    | 6  | 6233±155 | 0.704  | 16  | 4756±105 | 0.006  |
|                |            | CC+CT | 43 | 6286±162 | 0.255  | 102 | 5385±149 | 0.192  |
|                |            | Trend |    |          | 0.304  |     |          | 0.033  |
| <i>CYBA</i>    | rs3794624  | GG    | 70 | 6606±193 |        | 173 | 5491±127 |        |
|                |            | AG    | 29 | 6279±126 | 0.684  | 53  | 5511±146 | 0.760  |
|                |            | AA    | 4  | 6600±129 | 0.821  | 3   | 6067±241 | 0.845  |
|                |            | AA+AG | 33 | 6318±125 | 0.760  | 56  | 5541±149 | 0.810  |
|                |            | Trend |    |          | 0.859  |     |          | 0.877  |
| <i>MVD</i>     | rs8854     | CC    | 99 | 6610±170 |        | 227 | 5487±132 |        |
|                |            | CT    | 4  | 4125±704 | <0.001 | 3   | 6400±173 | 0.312  |
| <i>MVD</i>     | rs3736112  | CC    | 75 | 6717±167 |        | 167 | 5454±130 |        |
|                |            | CT    | 27 | 5996±185 | 0.109  | 61  | 5616±140 | 0.468  |
|                |            | TT    | 1  | 5200     | <0.001 | 1   | 6800     | <0.001 |
|                |            | TT+CT | 28 | 5968±182 | 0.084  | 62  | 5635±139 | 0.377  |
|                |            | Trend |    |          | 0.062  |     |          | 0.287  |
| <i>CYP21A2</i> | rs6474     | GG    | 75 | 6509±172 |        | 156 | 5400±124 |        |
|                |            | AG    | 24 | 6579±193 | 0.686  | 65  | 5637±145 | 0.470  |
|                |            | AA    | 4  | 6200±787 | 0.964  | 9   | 6211±169 | 0.243  |
|                |            | AA+AG | 28 | 6525±181 | 0.702  | 74  | 5707±148 | 0.302  |
|                |            | Trend |    |          | 0.733  |     |          | 0.210  |
| <i>CYP21A2</i> | rs12525076 | GG    | 64 | 6459±162 |        | 133 | 5443±127 |        |
|                |            | AG    | 29 | 6717±194 | 0.750  | 73  | 5592±138 | 0.158  |
|                |            | AA    | 9  | 6233±212 | 0.747  | 18  | 5444±163 | 0.572  |
|                |            | AA+AG | 38 | 6603±196 | 0.924  | 91  | 5563±143 | 0.376  |
|                |            | Trend |    |          | 0.909  |     |          | 0.799  |
| <i>DAF</i>     | rs4844592  | TT    | 33 | 6633±161 |        | 60  | 5297±122 |        |
|                |            | AT    | 52 | 6438±166 | 0.599  | 119 | 5608±139 | 0.460  |
|                |            | AA    | 18 | 6511±221 | 0.372  | 51  | 5482±128 | 0.501  |
|                |            | AA+AT | 70 | 6457±180 | 0.462  | 170 | 5570±136 | 0.418  |
|                |            | Trend |    |          | 0.369  |     |          | 0.484  |
| <i>DAF</i>     | rs11117564 | AA    | 41 | 6510±192 |        | 89  | 5491±124 |        |
|                |            | AC    | 47 | 6481±166 | 0.606  | 112 | 5497±137 | 0.399  |
|                |            | CC    | 15 | 6627±152 | 0.542  | 29  | 5528±146 | 0.636  |

|       |           |       |    |          |       |     |          |       |
|-------|-----------|-------|----|----------|-------|-----|----------|-------|
|       |           | CC+AC | 62 | 6516±162 | 0.539 | 141 | 5504±138 | 0.617 |
|       |           | Trend |    |          | 0.507 |     |          | 0.968 |
| ZNF76 | rs729925  | AA    | 98 | 6462±173 |       | 223 | 5508±135 |       |
|       |           | AC    | 3  | 7300±235 | 0.370 | 7   | 5200±289 | 0.672 |
|       |           | CC    | 2  | 7850±134 | 0.130 |     |          |       |
|       |           | CC+AC | 5  | 7520±181 | 0.130 | 7   | 5200±289 | 0.672 |
|       |           | Trend |    |          | 0.092 |     |          | 0.672 |
| DEF6  | rs9380500 | CC    | 49 | 5963±158 |       | 106 | 5567±137 |       |
|       |           | CG    | 39 | 6923±180 | 0.004 | 95  | 5435±126 | 0.373 |
|       |           | GG    | 15 | 7247±159 | 0.015 | 29  | 5459±142 | 0.687 |
|       |           | GG+CG | 54 | 7013±174 | 0.001 | 124 | 5440±129 | 0.381 |
|       |           | Trend |    |          | 0.002 |     |          | 0.495 |
| DEF6  | rs6938946 | TT    | 49 | 5963±158 |       | 103 | 5589±136 |       |
|       |           | CT    | 39 | 6923±180 | 0.004 | 98  | 5415±127 | 0.301 |
|       |           | CC    | 15 | 7247±159 | 0.015 | 29  | 5459±142 | 0.645 |
|       |           | CC+CT | 54 | 7013±174 | 0.001 | 127 | 5425±130 | 0.310 |
|       |           | Trend |    |          | 0.002 |     |          | 0.431 |
| DEF6  | rs6915410 | TT    | 98 | 6548±173 |       | 224 | 5499±134 |       |
|       |           | CT    | 5  | 5840±202 | 0.355 | 5   | 5440±709 | 0.174 |
| DEFA3 | rs4841815 | TT    | 67 | 6766±164 |       | 151 | 5481±135 |       |
|       |           | CT    | 30 | 5813±155 | 0.007 | 74  | 5566±131 | 0.292 |
|       |           | CC    | 5  | 7500±296 | 0.529 | 5   | 5020±991 | 0.681 |
|       |           | CC+CT | 35 | 6054±185 | 0.041 | 79  | 5532±130 | 0.355 |
|       |           | Trend |    |          | 0.288 |     |          | 0.487 |
| DEFA3 | rs7825750 | TT    | 41 | 6263±189 |       | 84  | 5498±126 |       |
|       |           | CT    | 39 | 6444±147 | 0.567 | 112 | 5423±128 | 0.534 |
|       |           | CC    | 23 | 7078±181 | 0.155 | 33  | 5748±165 | 0.560 |
|       |           | CC+CT | 62 | 6679±162 | 0.286 | 145 | 5497±137 | 0.794 |
|       |           | Trend |    |          | 0.167 |     |          | 0.759 |
| DEFA3 | rs7841223 | GG    | 90 | 6546±175 |       | 202 | 5486±129 |       |
|       |           | AG    | 11 | 6173±176 | 0.863 | 27  | 5615±159 | 0.891 |
|       |           | AA    | 2  | 6950±120 | 0.219 | 1   | 5000     | 0.052 |
|       |           | AA+AG | 13 | 6292±166 | 0.956 | 28  | 5593±156 | 0.841 |
|       |           | Trend |    |          | 0.767 |     |          | 0.789 |
| DEFA3 | rs4288398 | GG    | 51 | 6516±185 |       | 109 | 5537±146 |       |
|       |           | AG    | 42 | 6348±158 | 0.551 | 89  | 5444±126 | 0.734 |
|       |           | AA    | 10 | 7200±174 | 0.179 | 31  | 5561±105 | 0.861 |
|       |           | AA+AG | 52 | 6512±163 | 0.933 | 120 | 5474±120 | 0.740 |
|       |           | Trend |    |          | 0.569 |     |          | 0.786 |
| DEFA3 | rs883182  | CC    | 50 | 6506±179 |       | 80  | 5416±116 |       |
|       |           | CG    | 36 | 6217±149 | 0.381 | 108 | 5552±135 | 0.941 |
|       |           | GG    | 17 | 7165±196 | 0.147 | 41  | 5512±158 | 0.594 |
|       |           | GG+CG | 53 | 6521±170 | 0.911 | 149 | 5541±141 | 0.771 |
|       |           | Trend |    |          | 0.312 |     |          | 0.619 |
| DEFA3 | rs4332159 | AA    | 72 | 6639±167 |       | 156 | 5491±138 |       |
|       |           | AG    | 29 | 6152±192 | 0.152 | 65  | 5537±126 | 0.245 |
|       |           | GG    | 2  | 7250±134 | 0.321 | 9   | 5356±958 | 0.391 |
|       |           | GG+AG | 31 | 6223±189 | 0.204 | 74  | 5515±122 | 0.198 |
|       |           | Trend |    |          | 0.347 |     |          | 0.185 |

|              |            |       |     |          |       |     |          |       |
|--------------|------------|-------|-----|----------|-------|-----|----------|-------|
| <i>DEFA3</i> | rs17382179 | CC    | 102 | 6511±174 |       | 227 | 5504±132 |       |
|              |            | CG    | 1   | 6800     | 0.332 | 3   | 5133±173 | 0.356 |
| <i>DEFA3</i> | rs6984215  | TT    | 45  | 6602±174 |       | 110 | 5585±147 |       |
|              |            | CT    | 45  | 6376±176 | 0.313 | 94  | 5423±122 | 0.650 |
|              |            | CC    | 13  | 6685±176 | 0.742 | 26  | 5408±104 | 0.470 |
|              |            | CC+CT | 58  | 6445±175 | 0.490 | 120 | 5420±118 | 0.545 |
|              |            | Trend |     |          | 0.841 |     |          | 0.471 |
| <i>DEFA3</i> | rs6605579  | CC    | 58  | 6767±166 |       | 130 | 5490±132 |       |
|              |            | AC    | 39  | 6205±181 | 0.085 | 84  | 5555±140 | 0.552 |
|              |            | AA    | 6   | 6067±184 | 0.525 | 16  | 5275±971 | 0.517 |
|              |            | AA+AC | 45  | 6187±180 | 0.081 | 100 | 5510±134 | 0.477 |
|              |            | Trend |     |          | 0.134 |     |          | 0.435 |
| <i>DEFA6</i> | rs2741692  | GG    | 65  | 6532±179 |       | 145 | 5551±133 |       |
|              |            | AG    | 34  | 6471±169 | 0.874 | 73  | 5411±139 | 0.365 |
|              |            | AA    | 4   | 6575±170 | 0.974 | 11  | 5355±933 | 0.933 |
|              |            | AA+AG | 38  | 6482±167 | 0.876 | 84  | 5404±133 | 0.402 |
|              |            | Trend |     |          | 0.883 |     |          | 0.495 |
| <i>DEFA6</i> | rs13275170 | TT    | 41  | 6366±169 |       | 104 | 5501±124 |       |
|              |            | CT    | 44  | 6532±161 | 0.347 | 95  | 5520±147 | 0.970 |
|              |            | CC    | 18  | 6806±215 | 0.401 | 31  | 5426±120 | 0.923 |
|              |            | CC+CT | 62  | 6611±177 | 0.283 | 126 | 5497±140 | 0.997 |
|              |            | Trend |     |          | 0.338 |     |          | 0.953 |
| <i>DEFA6</i> | rs712276   | AA    | 93  | 6489±173 |       | 210 | 5498±133 |       |
|              |            | AG    | 10  | 6740±186 | 0.750 | 20  | 5505±136 | 0.951 |
| <i>DEFA6</i> | rs2738120  | GG    | 35  | 6363±157 |       | 73  | 5515±126 |       |
|              |            | CG    | 47  | 6617±185 | 0.269 | 117 | 5531±141 | 0.641 |
|              |            | CC    | 21  | 6533±182 | 0.683 | 40  | 5375±121 | 0.864 |
|              |            | CC+CG | 68  | 6591±182 | 0.305 | 157 | 5491±136 | 0.668 |
|              |            | Trend |     |          | 0.535 |     |          | 0.793 |
| <i>DEFA6</i> | rs11784359 | GG    | 49  | 6345±151 |       | 97  | 5641±151 |       |
|              |            | GT    | 44  | 6641±197 | 0.282 | 103 | 5396±107 | 0.667 |
|              |            | TT    | 10  | 6780±179 | 0.397 | 30  | 5390±147 | 0.771 |
|              |            | TT+GT | 54  | 6667±192 | 0.221 | 133 | 5395±117 | 0.652 |
|              |            | Trend |     |          | 0.231 |     |          | 0.693 |
| <i>DEFA6</i> | rs2741689  | TT    | 71  | 6462±183 |       | 176 | 5431±124 |       |
|              |            | CT    | 22  | 6405±153 | 0.804 | 51  | 5649±152 | 0.841 |
|              |            | CC    | 10  | 7120±149 | 0.359 | 3   | 6900±252 | 0.188 |
|              |            | CC+CT | 32  | 6628±153 | 0.852 | 54  | 5719±158 | 0.872 |
|              |            | Trend |     |          | 0.597 |     |          | 0.609 |
| <i>DEFA6</i> | rs2741688  | TT    | 82  | 6582±184 |       | 194 | 5546±139 |       |
|              |            | CT    | 17  | 6412±133 | 0.798 | 34  | 5232±935 | 0.520 |
|              |            | CC    | 4   | 5550±810 | 0.061 | 2   | 5450±919 | 0.620 |
|              |            | CC+CT | 21  | 6248±128 | 0.363 | 36  | 5244±922 | 0.565 |
|              |            | Trend |     |          | 0.164 |     |          | 0.625 |
| <i>DEFA6</i> | rs2738116  | AA    | 79  | 6635±180 |       | 191 | 5541±139 |       |
|              |            | AG    | 20  | 6225±157 | 0.433 | 34  | 5221±947 | 0.580 |
|              |            | GG    | 4   | 5550±810 | 0.047 | 5   | 5780±870 | 0.110 |
|              |            | GG+AG | 24  | 6113±148 | 0.209 | 39  | 5292±946 | 0.886 |
|              |            | Trend |     |          | 0.094 |     |          | 0.798 |

|       |            |       |    |          |        |     |          |       |
|-------|------------|-------|----|----------|--------|-----|----------|-------|
| DEFA6 | rs3918350  | CC    | 29 | 7686±175 |        | 83  | 5649±129 |       |
|       |            | CT    | 54 | 5909±154 | <0.001 | 102 | 5386±147 | 0.171 |
|       |            | TT    | 20 | 6445±139 | 0.001  | 45  | 5476±100 | 0.542 |
|       |            | TT+CT | 74 | 6054±151 | <0.001 | 147 | 5414±134 | 0.204 |
|       |            | Trend |    |          | 0.001  |     |          | 0.395 |
| DEFA6 | rs2702938  | CC    | 31 | 6635±150 |        | 65  | 5483±120 |       |
|       |            | CT    | 48 | 6492±197 | 0.522  | 119 | 5371±128 | 0.388 |
|       |            | TT    | 24 | 6400±157 | 0.601  | 46  | 5852±156 | 0.651 |
|       |            | TT+CT | 72 | 6461±184 | 0.489  | 165 | 5505±137 | 0.614 |
|       |            | Trend |    |          | 0.569  |     |          | 0.797 |
| DEFA4 | rs2738112  | GG    | 83 | 6657±183 |        | 194 | 5536±139 |       |
|       |            | AG    | 18 | 5956±114 | 0.132  | 33  | 5252±940 | 0.784 |
|       |            | AA    | 2  | 5600±990 | 0.109  | 3   | 5833±833 | 0.044 |
|       |            | AA+AG | 20 | 5920±110 | 0.054  | 36  | 5300±935 | 0.935 |
|       |            | Trend |    |          | 0.030  |     |          | 0.904 |
| DEFA4 | rs2741683  | CC    | 41 | 6256±164 |        | 84  | 5455±115 |       |
|       |            | CT    | 50 | 6876±184 | 0.125  | 116 | 5428±131 | 0.433 |
|       |            | TT    | 12 | 5883±133 | 0.526  | 30  | 5897±176 | 0.454 |
|       |            | TT+CT | 62 | 6684±179 | 0.257  | 146 | 5524±142 | 0.693 |
|       |            | Trend |    |          | 0.762  |     |          | 0.752 |
| DEFA4 | rs4526381  | TT    | 67 | 6843±173 |        | 139 | 5506±134 |       |
|       |            | CT    | 31 | 5945±170 | 0.012  | 78  | 5532±133 | 0.833 |
|       |            | CC    | 5  | 5620±841 | 0.010  | 13  | 5223±128 | 0.373 |
|       |            | CC+CT | 36 | 5900±160 | 0.005  | 91  | 5488±132 | 0.995 |
|       |            | Trend |    |          | 0.003  |     |          | 0.771 |
| DEFA4 | rs2702860  | CC    | 82 | 6655±184 |        | 191 | 5532±139 |       |
|       |            | CT    | 19 | 6000±112 | 0.195  | 35  | 5320±967 | 0.831 |
|       |            | TT    | 2  | 5600±990 | 0.112  | 3   | 5833±833 | 0.041 |
|       |            | TT+CT | 21 | 5962±109 | 0.084  | 38  | 5361±958 | 0.982 |
|       |            | Trend |    |          | 0.046  |     |          | 0.858 |
| DEFA4 | rs13251447 | CC    | 47 | 6128±143 |        | 110 | 5588±147 |       |
|       |            | AC    | 45 | 6640±198 | 0.189  | 99  | 5383±113 | 0.806 |
|       |            | AA    | 11 | 7645±134 | 0.001  | 21  | 5576±143 | 0.861 |
|       |            | AA+AC | 56 | 6838±191 | 0.045  | 120 | 5417±118 | 0.793 |
|       |            | Trend |    |          | 0.003  |     |          | 0.806 |
| DEFA4 | rs2738100  | AA    | 29 | 6021±153 |        | 59  | 5612±146 |       |
|       |            | AG    | 50 | 6732±166 | 0.053  | 125 | 5434±130 | 0.655 |
|       |            | GG    | 23 | 6496±195 | 0.468  | 46  | 5528±121 | 0.883 |
|       |            | GG+AG | 73 | 6658±174 | 0.090  | 171 | 5460±128 | 0.694 |
|       |            | Trend |    |          | 0.374  |     |          | 0.853 |
| DEFA5 | rs10503360 | GG    | 28 | 6457±184 |        | 75  | 5476±117 |       |
|       |            | GT    | 48 | 6585±157 | 0.667  | 113 | 5551±138 | 0.509 |
|       |            | TT    | 9  | 6144±158 | 0.723  | 29  | 5438±156 | 0.313 |
|       |            | TT+GT | 57 | 6516±157 | 0.759  | 142 | 5528±142 | 0.914 |
|       |            | Trend |    |          | 0.975  |     |          | 0.500 |
| DEFA5 | rs9644778  | AA    | 46 | 6413±180 |        | 106 | 5443±120 |       |
|       |            | AC    | 49 | 6686±164 | 0.583  | 98  | 5619±142 | 0.547 |
|       |            | CC    | 8  | 6038±202 | 0.557  | 25  | 5308±147 | 0.264 |
|       |            | CC+AC | 57 | 6595±169 | 0.763  | 123 | 5556±143 | 0.950 |

|              |            |       |    |          |        |       |          |       |
|--------------|------------|-------|----|----------|--------|-------|----------|-------|
|              |            | Trend |    |          | 0.904  |       |          | 0.520 |
| <i>DEFA5</i> | rs10095331 | GG    | 77 | 6583±172 |        | 183   | 5493±131 |       |
|              |            | AG    | 25 | 6248±180 | 0.481  | 46    | 5535±140 | 0.895 |
|              |            | AA    | 1  | 7800     | <0.001 | 1     | 4800     | 0.444 |
|              |            | AA+AG | 26 | 6308±179 | 0.578  | 47    | 5519±139 | 0.882 |
|              |            | Trend |    |          |        | 0.720 |          |       |
| <i>DEFA5</i> | rs4610776  | AA    | 84 | 6485±173 |        | 185   | 5497±135 |       |
|              |            | AT    | 18 | 6539±179 | 0.671  | 44    | 5525±123 | 0.908 |
|              |            | TT    | 1  | 8500     | <0.001 | 1     | 4700     | 0.020 |
|              |            | TT+AT | 19 | 6642±179 | 0.505  | 45    | 5507±122 | 0.856 |
|              |            | Trend |    |          |        | 0.351 |          |       |
| <i>DEFA5</i> | rs7834209  | TT    | 24 | 6442±169 |        | 66    | 5547±126 |       |
|              |            | GT    | 56 | 6463±185 | 0.956  | 112   | 5514±135 | 0.776 |
|              |            | GG    | 23 | 6713±153 | 0.506  | 52    | 5404±137 | 0.398 |
|              |            | GG+GT | 79 | 6535±176 | 0.857  | 164   | 5479±136 | 0.885 |
|              |            | Trend |    |          |        | 0.511 |          |       |
| <i>DEFA5</i> | rs4240691  | CC    | 22 | 6414±170 |        | 62    | 5555±117 |       |
|              |            | CT    | 54 | 6506±189 | 0.899  | 111   | 5568±142 | 0.834 |
|              |            | TT    | 26 | 6688±146 | 0.517  | 57    | 5304±131 | 0.179 |
|              |            | TT+CT | 80 | 6565±175 | 0.879  | 168   | 5478±138 | 0.696 |
|              |            | Trend |    |          |        | 0.491 |          |       |
| <i>DEFB1</i> | rs2741109  | GG    | 50 | 6536±177 |        | 136   | 5592±133 |       |
|              |            | AG    | 43 | 6512±172 | 0.682  | 78    | 5414±140 | 0.206 |
|              |            | AA    | 10 | 6410±181 | 0.884  | 16    | 5119±831 | 0.605 |
|              |            | AA+AG | 53 | 6492±172 | 0.697  | 94    | 5364±132 | 0.208 |
|              |            | Trend |    |          |        | 0.766 |          |       |
| <i>DEFB1</i> | rs2702833  | GG    | 30 | 6697±196 |        | 97    | 5415±139 |       |
|              |            | GT    | 60 | 6393±159 | 0.696  | 98    | 5544±129 | 0.823 |
|              |            | TT    | 13 | 6646±195 | 0.744  | 34    | 5612±129 | 0.382 |
|              |            | TT+GT | 73 | 6438±164 | 0.824  | 132   | 5561±129 | 0.627 |
|              |            | Trend |    |          |        | 0.886 |          |       |
| <i>DEFB1</i> | rs2741112  | CC    | 35 | 6646±189 |        | 94    | 5439±140 |       |
|              |            | CG    | 55 | 6398±161 | 0.611  | 104   | 5501±126 | 0.943 |
|              |            | GG    | 13 | 6646±195 | 0.749  | 31    | 5710±133 | 0.462 |
|              |            | GG+CG | 68 | 6446±166 | 0.756  | 135   | 5549±127 | 0.770 |
|              |            | Trend |    |          |        | 0.940 |          |       |
| <i>DEFB1</i> | rs2702829  | AA    | 26 | 6315±196 |        | 79    | 5543±129 |       |
|              |            | AG    | 44 | 6407±141 | 0.723  | 100   | 5394±122 | 0.134 |
|              |            | GG    | 33 | 6812±196 | 0.686  | 50    | 5662±157 | 0.759 |
|              |            | GG+AG | 77 | 6581±166 | 0.675  | 150   | 5483±135 | 0.371 |
|              |            | Trend |    |          |        | 0.691 |          |       |
| <i>DEFB1</i> | rs2980924  | GG    | 76 | 6589±171 |        | 152   | 5539±135 |       |
|              |            | AG    | 25 | 6392±183 | 0.687  | 69    | 5464±130 | 0.844 |
|              |            | AA    | 2  | 5150±162 | 0.148  | 9     | 5089±122 | 0.159 |
|              |            | AA+AG | 27 | 6300±181 | 0.491  | 78    | 5421±128 | 0.909 |
|              |            | Trend |    |          |        | 0.332 |          |       |
| <i>DEFB1</i> | rs5743407  | CC    | 32 | 6722±199 |        | 95    | 5422±140 |       |
|              |            | CG    | 45 | 6253±145 | 0.537  | 101   | 5472±121 | 0.890 |
|              |            | GG    | 24 | 6683±193 | 0.989  | 31    | 5713±130 | 0.399 |



|                |            |       |    |          |       |     |          |       |
|----------------|------------|-------|----|----------|-------|-----|----------|-------|
|                |            | GG+CG | 69 | 6403±164 | 0.673 | 132 | 5529±123 | 0.693 |
|                |            | Trend |    |          | 0.925 |     |          | 0.486 |
| <i>DEFB1</i>   | rs2977826  | TT    | 70 | 6607±175 |       | 141 | 5454±123 |       |
|                |            | CT    | 26 | 6085±171 | 0.225 | 75  | 5623±143 | 0.175 |
|                |            | CC    | 7  | 7171±160 | 0.665 | 12  | 4875±114 | 0.031 |
|                |            | CC+CT | 33 | 6315±172 | 0.387 | 87  | 5520±141 | 0.449 |
|                |            | Trend |    |          | 0.677 |     |          | 0.916 |
| <i>DEFB1</i>   | rs2978858  | GG    | 34 | 6676±193 |       | 92  | 5459±142 |       |
|                |            | CG    | 58 | 6355±157 | 0.624 | 106 | 5482±126 | 0.946 |
|                |            | CC    | 11 | 6845±204 | 0.587 | 31  | 5713±130 | 0.471 |
|                |            | CC+CG | 69 | 6433±164 | 0.794 | 137 | 5534±127 | 0.864 |
|                |            | Trend |    |          | 0.826 |     |          | 0.607 |
| <i>DEFB1</i>   | rs2738169  | GG    | 34 | 6676±193 |       | 95  | 5473±141 |       |
|                |            | AG    | 59 | 6363±155 | 0.652 | 103 | 5470±126 | 0.951 |
|                |            | AA    | 10 | 6850±215 | 0.634 | 31  | 5713±130 | 0.436 |
|                |            | AA+AG | 69 | 6433±164 | 0.794 | 134 | 5526±127 | 0.757 |
|                |            | Trend |    |          | 0.871 |     |          | 0.540 |
| <i>DEFB1</i>   | rs7826831  | TT    | 88 | 6557±174 |       | 182 | 5547±135 |       |
|                |            | CT    | 15 | 6260±175 | 0.233 | 44  | 5377±122 | 0.788 |
|                |            | CC    |    |          |       | 4   | 4625±109 | 0.040 |
|                |            | CC+CT | 15 | 6260±175 | 0.233 | 48  | 5315±121 | 0.582 |
|                |            | Trend |    |          | 0.233 |     |          | 0.396 |
| <i>DEFB1</i>   | rs2738163  | TT    | 31 | 6581±176 |       | 67  | 5621±149 |       |
|                |            | CT    | 39 | 6626±188 | 0.974 | 106 | 5448±133 | 0.276 |
|                |            | CC    | 33 | 6318±157 | 0.861 | 57  | 5449±112 | 0.805 |
|                |            | CC+CT | 72 | 6485±174 | 0.910 | 163 | 5448±126 | 0.383 |
|                |            | Trend |    |          | 0.860 |     |          | 0.766 |
| <i>DEFB118</i> | rs6057649  | AA    | 61 | 6448±176 |       | 119 | 5587±137 |       |
|                |            | AC    | 36 | 6522±135 | 0.794 | 88  | 5534±129 | 0.948 |
|                |            | CC    | 6  | 7133±335 | 0.857 | 23  | 4904±110 | 0.027 |
|                |            | CC+AC | 42 | 6610±172 | 0.775 | 111 | 5404±127 | 0.411 |
|                |            | Trend |    |          | 0.797 |     |          | 0.102 |
| <i>DEFB119</i> | rs709045   | CC    | 61 | 6448±176 |       | 119 | 5561±134 |       |
|                |            | CT    | 36 | 6522±135 | 0.794 | 88  | 5569±134 | 0.854 |
|                |            | TT    | 6  | 7133±335 | 0.857 | 23  | 4904±110 | 0.032 |
|                |            | TT+CT | 42 | 6610±172 | 0.775 | 111 | 5432±132 | 0.550 |
|                |            | Trend |    |          | 0.797 |     |          | 0.143 |
| <i>DEFB126</i> | rs16994490 | AA    | 38 | 6432±149 |       | 88  | 5595±130 |       |
|                |            | AG    | 44 | 6736±180 | 0.271 | 105 | 5398±121 | 0.330 |
|                |            | GG    | 21 | 6195±202 | 0.439 | 37  | 5554±169 | 0.345 |
|                |            | GG+AG | 65 | 6562±187 | 0.666 | 142 | 5439±135 | 0.247 |
|                |            | Trend |    |          | 0.620 |     |          | 0.278 |
| <i>DEFB126</i> | rs6054706  | CC    | 41 | 6205±186 |       | 68  | 5649±150 |       |
|                |            | CT    | 42 | 6876±172 | 0.082 | 117 | 5403±125 | 0.528 |
|                |            | TT    | 20 | 6385±143 | 0.562 | 44  | 5548±126 | 0.980 |
|                |            | TT+CT | 62 | 6718±164 | 0.132 | 161 | 5443±125 | 0.630 |
|                |            | Trend |    |          | 0.350 |     |          | 0.922 |
| <i>DEFB126</i> | rs13036802 | TT    | 69 | 6609±179 |       | 149 | 5466±135 |       |
|                |            | CT    | 29 | 6272±163 | 0.275 | 77  | 5570±132 | 0.515 |

|                |            |       |    |          |       |     |          |       |
|----------------|------------|-------|----|----------|-------|-----|----------|-------|
|                |            | CC    | 5  | 6600±177 | 0.804 | 4   | 5350±700 | 0.698 |
|                |            | CC+CT | 34 | 6321±163 | 0.378 | 81  | 5559±129 | 0.493 |
|                |            | Trend |    |          | 0.598 |     |          | 0.474 |
| <i>DEFB127</i> | rs1434789  | TT    | 30 | 6507±171 |       | 68  | 5340±119 |       |
|                |            | GT    | 48 | 6565±185 | 0.934 | 121 | 5612±141 | 0.327 |
|                |            | GG    | 25 | 6424±160 | 0.795 | 40  | 5455±127 | 0.537 |
|                |            | GG+GT | 73 | 6516±176 | 0.867 | 161 | 5573±138 | 0.322 |
|                |            | Trend |    |          | 0.800 |     |          | 0.444 |
| <i>DLG5</i>    | rs1248623  | CC    | 61 | 6582±164 |       | 121 | 5581±120 |       |
|                |            | CT    | 34 | 6665±196 | 0.860 | 89  | 5328±149 | 0.073 |
|                |            | TT    | 8  | 5350±970 | 0.007 | 20  | 5760±127 | 0.524 |
|                |            | TT+CT | 42 | 6414±188 | 0.425 | 109 | 5407±145 | 0.165 |
|                |            | Trend |    |          | 0.109 |     |          | 0.542 |
| <i>DLG5</i>    | rs11002306 | AA    | 67 | 6636±178 |       | 148 | 5483±137 |       |
|                |            | AT    | 31 | 6219±164 | 0.141 | 71  | 5499±126 | 0.608 |
|                |            | TT    | 5  | 6700±187 | 0.787 | 11  | 5709±126 | 0.674 |
|                |            | TT+AT | 36 | 6286±165 | 0.231 | 82  | 5527±126 | 0.571 |
|                |            | Trend |    |          | 0.449 |     |          | 0.548 |
| <i>DLG5</i>    | rs1248650  | GG    | 47 | 6406±153 |       | 126 | 5420±126 |       |
|                |            | AG    | 50 | 6510±192 | 0.639 | 86  | 5536±143 | 0.226 |
|                |            | AA    | 6  | 7383±167 | 0.135 | 18  | 5872±127 | 0.125 |
|                |            | AA+AG | 56 | 6604±190 | 0.412 | 104 | 5594±140 | 0.124 |
|                |            | Trend |    |          | 0.194 |     |          | 0.080 |
| <i>FCER1A</i>  | rs16841987 | GG    | 99 | 6497±175 |       | 222 | 5496±132 |       |
|                |            | AG    | 4  | 6925±159 | 0.746 | 8   | 5563±151 | 0.924 |
| <i>FCER1A</i>  | rs7548864  | AA    | 22 | 6755±196 |       | 74  | 5339±114 |       |
|                |            | AG    | 36 | 6542±175 | 0.932 | 107 | 5679±137 | 0.319 |
|                |            | GG    | 38 | 6389±160 | 0.312 | 43  | 5263±134 | 0.346 |
|                |            | GG+AG | 74 | 6464±167 | 0.585 | 150 | 5560±137 | 0.699 |
|                |            | Trend |    |          | 0.260 |     |          | 0.527 |
| <i>FCER1A</i>  | rs2251746  | TT    | 87 | 6557±171 |       | 209 | 5465±130 |       |
|                |            | CT    | 16 | 6275±190 | 0.573 | 19  | 5916±161 | 0.225 |
|                |            | CC    |    |          |       | 2   | 5050±134 | 0.391 |
|                |            | CC+CT | 16 | 6275±190 | 0.573 | 21  | 5833±158 | 0.275 |
|                |            | Trend |    |          | 0.573 |     |          | 0.359 |
| <i>FCER1A</i>  | rs2494250  | CC    | 59 | 6793±182 |       | 140 | 5537±135 |       |
|                |            | CG    | 38 | 5897±146 | 0.031 | 79  | 5544±130 | 0.833 |
|                |            | GG    | 6  | 7667±136 | 0.104 | 11  | 4682±108 | 0.014 |
|                |            | GG+CG | 44 | 6139±156 | 0.111 | 90  | 5439±130 | 0.456 |
|                |            | Trend |    |          | 0.579 |     |          | 0.165 |
| <i>FCER1A</i>  | rs16842010 | TT    | 37 | 6597±168 |       | 71  | 5479±144 |       |
|                |            | CT    | 51 | 6522±192 | 0.838 | 112 | 5496±137 | 0.780 |
|                |            | CC    | 14 | 6286±124 | 0.452 | 47  | 5534±105 | 0.402 |
|                |            | CC+CT | 65 | 6471±179 | 0.695 | 159 | 5508±128 | 0.911 |
|                |            | Trend |    |          | 0.510 |     |          | 0.491 |
| <i>OR10J3</i>  | rs2494251  | GG    | 48 | 6644±180 |       | 126 | 5403±118 |       |
|                |            | AG    | 48 | 6371±168 | 0.553 | 89  | 5661±150 | 0.653 |
|                |            | AA    | 7  | 6600±181 | 0.815 | 15  | 5340±134 | 0.964 |
|                |            | AA+AG | 55 | 6400±168 | 0.634 | 104 | 5614±148 | 0.688 |

|               |            |       |     |          |        |     |          |        |
|---------------|------------|-------|-----|----------|--------|-----|----------|--------|
|               |            | Trend |     |          | 0.835  |     |          | 0.782  |
| <i>OR10J3</i> | rs2427829  | GG    | 92  | 6499±170 |        | 199 | 5558±131 |        |
|               |            | AG    | 11  | 6636±209 | 0.633  | 29  | 5210±138 | 0.297  |
|               |            | AA    |     |          |        | 2   | 3800±707 | 0.028  |
|               |            | AA+AG | 11  | 6636±209 | 0.633  | 31  | 5119±138 | 0.179  |
|               |            | Trend |     |          | 0.633  |     |          | 0.099  |
| <i>NDUFS2</i> | rs4656993  | GG    | 77  | 6509±173 |        | 201 | 5521±133 |        |
|               |            | AG    | 25  | 6388±167 | 0.951  | 29  | 5345±131 | 0.271  |
|               |            | AA    | 1   | 10000    | <0.001 |     |          |        |
|               |            | AA+AG | 26  | 6527±178 | 0.750  | 29  | 5345±131 | 0.271  |
|               |            | Trend |     |          | 0.496  |     |          | 0.271  |
| <i>NDUFS2</i> | rs16832694 | AA    | 98  | 6518±176 |        | 219 | 5519±134 |        |
|               |            | AG    | 4   | 6825±134 | 0.382  | 11  | 5100±100 | 0.502  |
|               |            | GG    | 1   | 4800     | <0.001 |     |          |        |
|               |            | GG+AG | 5   | 6420±147 | 0.838  | 11  | 5100±100 | 0.502  |
|               |            | Trend |     |          | 0.801  |     |          | 0.502  |
| <i>NDUFS2</i> | rs3924264  | CC    | 30  | 6497±197 |        | 78  | 5273±127 |        |
|               |            | CT    | 54  | 6485±161 | 0.596  | 114 | 5667±140 | 0.018  |
|               |            | TT    | 19  | 6621±179 | 0.475  | 37  | 5489±116 | 0.306  |
|               |            | TT+CT | 73  | 6521±165 | 0.519  | 151 | 5623±134 | 0.026  |
|               |            | Trend |     |          | 0.464  |     |          | 0.128  |
| <i>NDUFS2</i> | rs4656994  | GG    | 47  | 6526±188 |        | 99  | 5271±127 |        |
|               |            | AG    | 46  | 6539±169 | 0.695  | 101 | 5743±140 | 0.002  |
|               |            | AA    | 10  | 6340±137 | 0.939  | 29  | 5469±111 | 0.328  |
|               |            | AA+AG | 56  | 6504±162 | 0.745  | 130 | 5682±134 | 0.004  |
|               |            | Trend |     |          | 0.858  |     |          | 0.043  |
| <i>FCER1G</i> | rs11587213 | AA    | 95  | 6543±178 |        | 214 | 5499±133 |        |
|               |            | AG    | 3   | 6967±160 | 0.326  | 14  | 5450±147 | 0.946  |
|               |            | GG    | 4   | 5725±806 | 0.259  | 2   | 5800±141 | <0.001 |
|               |            | GG+AG | 7   | 6257±127 | 0.915  | 16  | 5494±137 | 0.852  |
|               |            | Trend |     |          | 0.714  |     |          | 0.667  |
| <i>FCER1G</i> | rs12094497 | GG    | 102 | 6515±174 |        | 225 | 5480±131 |        |
|               |            | AG    | 1   | 6400     | 0.101  | 5   | 6360±180 | 0.376  |
| <i>FCER1G</i> | rs2070902  | TT    | 24  | 6296±174 |        | 58  | 5212±124 |        |
|               |            | CT    | 48  | 6627±181 | 0.212  | 127 | 5624±140 | 0.044  |
|               |            | CC    | 31  | 6506±166 | 0.353  | 44  | 5543±119 | 0.215  |
|               |            | CC+CT | 79  | 6580±174 | 0.222  | 171 | 5603±134 | 0.046  |
|               |            | Trend |     |          | 0.389  |     |          | 0.170  |
| <i>FCER1G</i> | rs3557     | TT    | 101 | 6527±175 |        | 225 | 5480±131 |        |
|               |            | GT    | 2   | 5850±778 | 0.828  | 5   | 6360±180 | 0.376  |
| <i>FCER1G</i> | rs4489574  | TT    | 22  | 6350±164 |        | 65  | 5191±120 |        |
|               |            | CT    | 56  | 6552±172 | 0.567  | 117 | 5663±137 | 0.045  |
|               |            | CC    | 25  | 6572±190 | 0.642  | 47  | 5540±132 | 0.248  |
|               |            | CC+CT | 81  | 6558±177 | 0.561  | 164 | 5628±136 | 0.049  |
|               |            | Trend |     |          | 0.649  |     |          | 0.184  |
| <i>FCER1G</i> | rs7528588  | CC    | 58  | 6616±161 |        | 111 | 5402±141 |        |
|               |            | CG    | 37  | 6205±180 | 0.119  | 98  | 5691±126 | 0.090  |
|               |            | GG    | 8   | 7200±226 | 0.530  | 20  | 5155±107 | 0.131  |
|               |            | GG+CG | 45  | 6382±190 | 0.246  | 118 | 5600±124 | 0.275  |

|               |            |       |    |          |       |       |          |        |
|---------------|------------|-------|----|----------|-------|-------|----------|--------|
|               |            | Trend |    |          | 0.606 |       |          | 0.943  |
| <i>FCER1G</i> | rs12721035 | CC    | 77 | 6442±182 |       | 176   | 5342±120 |        |
|               |            | CT    | 24 | 6721±143 | 0.294 | 48    | 6123±161 | 0.001  |
|               |            | TT    | 2  | 6800±282 | 0.656 | 5     | 5260±699 | 0.173  |
|               |            | TT+CT | 26 | 6727±148 | 0.255 | 53    | 6042±157 | 0.001  |
|               |            | Trend |    |          |       | 0.276 |          | 0.003  |
| <i>APOA2</i>  | rs6413453  | GG    | 76 | 6442±183 |       | 177   | 5336±120 |        |
|               |            | AG    | 25 | 6708±140 | 0.261 | 48    | 6123±161 | 0.001  |
|               |            | AA    | 2  | 6800±282 | 0.652 | 5     | 5260±699 | 0.168  |
|               |            | AA+AG | 27 | 6715±145 | 0.228 | 53    | 6042±157 | 0.001  |
|               |            | Trend |    |          |       | 0.251 |          | 0.002  |
| <i>APOA2</i>  | rs5085     | CC    | 58 | 6683±160 |       | 110   | 5460±143 |        |
|               |            | CG    | 37 | 6100±178 | 0.076 | 99    | 5623±125 | 0.246  |
|               |            | GG    | 8  | 7200±226 | 0.579 | 20    | 5155±107 | 0.092  |
|               |            | GG+CG | 45 | 6296±189 | 0.175 | 119   | 5545±123 | 0.563  |
|               |            | Trend |    |          |       | 0.510 |          | 0.731  |
| <i>APOA2</i>  | rs5082     | AA    | 79 | 6514±173 |       | 208   | 5509±130 |        |
|               |            | AG    | 24 | 6513±178 | 0.884 | 22    | 5400±160 | 0.357  |
| <i>FCER2</i>  | rs1078625  | AA    | 44 | 6191±168 |       | 87    | 5724±151 |        |
|               |            | AG    | 44 | 6718±161 | 0.061 | 112   | 5446±117 | 0.393  |
|               |            | GG    | 15 | 6860±218 | 0.136 | 30    | 5083±124 | 0.086  |
|               |            | GG+AG | 59 | 6754±175 | 0.046 | 142   | 5369±119 | 0.217  |
| <i>FCER2</i>  | rs12971845 | Trend |    |          |       |       |          | 0.099  |
|               |            | TT    | 59 | 6249±171 |       | 132   | 5338±139 |        |
|               |            | CT    | 39 | 6903±175 | 0.056 | 83    | 5698±117 | 0.090  |
|               |            | CC    | 5  | 6600±171 | 0.328 | 15    | 5813±148 | 0.305  |
|               |            | CC+CT | 44 | 6868±172 | 0.047 | 98    | 5715±121 | 0.071  |
| <i>FCER2</i>  | rs11260013 | Trend |    |          |       |       |          | 0.088  |
|               |            | CC    | 44 | 6327±172 |       | 63    | 5544±151 |        |
|               |            | CT    | 38 | 6461±159 | 0.356 | 122   | 5573±125 | 0.703  |
|               |            | TT    | 21 | 7000±201 | 0.047 | 43    | 5242±129 | 0.359  |
|               |            | TT+CT | 59 | 6653±175 | 0.113 | 165   | 5487±126 | 0.997  |
| <i>FCER2</i>  | rs12984649 | Trend |    |          |       |       |          | 0.453  |
|               |            | GG    | 68 | 6297±167 |       | 146   | 5413±138 |        |
|               |            | AG    | 31 | 6897±189 | 0.085 | 73    | 5562±103 | 0.502  |
|               |            | AA    | 4  | 7225±114 | 0.040 | 9     | 6111±182 | 0.229  |
|               |            | AA+AG | 35 | 6934±181 | 0.040 | 82    | 5622±114 | 0.344  |
| <i>FCER2</i>  | rs7249320  | Trend |    |          |       |       |          | 0.232  |
|               |            | CC    | 74 | 6393±164 |       | 160   | 5694±131 |        |
|               |            | AC    | 29 | 6821±196 | 0.325 | 66    | 5124±127 | 0.017  |
|               |            | AA    |    |          |       | 3     | 3733±252 | <0.001 |
|               |            | AA+AC | 29 | 6821±196 | 0.325 | 69    | 5064±128 | 0.006  |
| <i>FCER2</i>  | rs12984870 | Trend |    |          |       |       |          | 0.001  |
|               |            | AA    | 32 | 6175±162 |       | 70    | 5736±132 |        |
|               |            | AG    | 51 | 6518±181 | 0.352 | 101   | 5669±131 | 0.959  |
|               |            | GG    | 20 | 7045±167 | 0.027 | 59    | 4925±121 | 0.002  |
|               |            | GG+AG | 71 | 6666±178 | 0.145 | 160   | 5395±132 | 0.162  |
| <i>FCER2</i>  | rs12980031 | Trend |    |          |       |       |          | 0.004  |
|               |            | TT    | 81 | 6384±148 |       | 179   | 5455±135 |        |

|               |            |       |     |          |        |     |          |        |
|---------------|------------|-------|-----|----------|--------|-----|----------|--------|
|               |            | GT    | 16  | 6938±262 | 0.507  | 50  | 5618±124 | 0.274  |
|               |            | GG    | 1   | 6200     | 0.371  | 1   | 7400     | <0.001 |
|               |            | GG+GT | 17  | 6894±255 | 0.531  | 51  | 5653±125 | 0.221  |
|               |            | Trend |     |          | 0.569  |     |          | 0.168  |
| <i>FCER2</i>  | rs2287868  | CC    | 38  | 6471±163 |        | 109 | 5316±127 |        |
|               |            | CT    | 56  | 6516±185 | 0.860  | 103 | 5626±141 | 0.091  |
|               |            | TT    | 9   | 6678±163 | 0.754  | 17  | 5800±104 | 0.064  |
|               |            | TT+CT | 65  | 6538±181 | 0.942  | 120 | 5651±136 | 0.045  |
|               |            | Trend |     |          | 0.911  |     |          | 0.024  |
| <i>FCER2</i>  | rs11672997 | GG    | 101 | 6524±175 |        | 224 | 5483±131 |        |
|               |            | AG    | 2   | 6000±707 | 0.592  | 4   | 6550±199 | 0.140  |
| <i>FCER2</i>  | rs1990975  | CC    | 80  | 6435±158 |        | 176 | 5490±135 |        |
|               |            | CT    | 22  | 6655±219 | 0.718  | 53  | 5492±123 | 0.656  |
|               |            | TT    | 1   | 9700     | <0.001 | 1   | 7400     | <0.001 |
|               |            | TT+CT | 23  | 6787±223 | 0.514  | 54  | 5528±124 | 0.567  |
|               |            | Trend |     |          | 0.330  |     |          | 0.467  |
| <i>FCER2</i>  | rs4804221  | CC    | 78  | 6459±159 |        | 181 | 5496±133 |        |
|               |            | CT    | 24  | 6558±211 | 0.929  | 47  | 5402±122 | 0.862  |
|               |            | TT    | 1   | 9700     | <0.001 | 2   | 8000±849 | <0.001 |
|               |            | TT+CT | 25  | 6684±216 | 0.711  | 49  | 5508±131 | 0.562  |
|               |            | Trend |     |          | 0.483  |     |          | 0.334  |
| <i>FCER2</i>  | rs753733   | GG    | 83  | 6422±160 |        | 168 | 5577±122 |        |
|               |            | AG    | 20  | 6895±222 | 0.328  | 57  | 5333±161 | 0.255  |
|               |            | AA    |     |          |        | 5   | 4760±891 | 0.119  |
|               |            | AA+AG | 20  | 6895±222 | 0.328  | 62  | 5287±157 | 0.169  |
|               |            | Trend |     |          | 0.328  |     |          | 0.107  |
| <i>FCGR2A</i> | rs7551957  | TT    | 58  | 6257±171 |        | 113 | 5487±145 |        |
|               |            | CT    | 41  | 6734±162 | 0.137  | 96  | 5591±116 | 0.341  |
|               |            | CC    | 4   | 7975±272 | 0.222  | 20  | 5185±132 | 0.248  |
|               |            | CC+CT | 45  | 6844±174 | 0.087  | 116 | 5521±120 | 0.636  |
|               |            | Trend |     |          | 0.074  |     |          | 0.811  |
| <i>FCGR2A</i> | rs10800309 | AA    | 55  | 6338±171 |        | 107 | 5479±148 |        |
|               |            | AG    | 41  | 6527±167 | 0.434  | 99  | 5605±116 | 0.219  |
|               |            | GG    | 7   | 7814±201 | 0.130  | 23  | 5183±123 | 0.252  |
|               |            | GG+AG | 48  | 6715±176 | 0.256  | 122 | 5525±118 | 0.486  |
|               |            | Trend |     |          | 0.141  |     |          | 0.892  |
| <i>FCGR2A</i> | rs4656308  | TT    | 62  | 6377±189 |        | 176 | 5564±131 |        |
|               |            | CT    | 17  | 5976±120 | 0.322  | 46  | 5261±144 | 0.096  |
|               |            | CC    | 17  | 7200±164 | 0.208  | 8   | 5425±774 | 0.890  |
|               |            | CC+CT | 34  | 6588±155 | 0.756  | 54  | 5285±136 | 0.115  |
|               |            | Trend |     |          | 0.362  |     |          | 0.182  |
| <i>FCGR2A</i> | rs12142755 | AA    | 71  | 6435±174 |        | 153 | 5401±129 |        |
|               |            | AG    | 29  | 6503±168 | 0.958  | 74  | 5659±135 | 0.186  |
|               |            | GG    | 2   | 9300±990 | <0.001 | 2   | 6850±289 | 0.380  |
|               |            | GG+AG | 31  | 6684±177 | 0.787  | 76  | 5691±138 | 0.148  |
|               |            | Trend |     |          | 0.533  |     |          | 0.126  |
| <i>FCGR2A</i> | rs12029217 | CC    | 96  | 6455±171 |        | 206 | 5450±127 |        |
|               |            | CT    | 7   | 7314±198 | 0.092  | 22  | 5605±144 | 0.901  |
| <i>HSPA6</i>  | rs12129787 | CC    | 33  | 6800±177 |        | 48  | 5402±128 |        |

|              |            |       |    |          |        |     |          |        |
|--------------|------------|-------|----|----------|--------|-----|----------|--------|
|              |            | CT    | 48 | 6265±173 | 0.282  | 143 | 5513±141 | 0.830  |
|              |            | TT    | 22 | 6627±169 | 0.959  | 38  | 5600±105 | 0.133  |
|              |            | TT+CT | 70 | 6379±172 | 0.393  | 181 | 5531±134 | 0.582  |
|              |            | Trend |    |          | 0.799  |     |          | 0.165  |
| <i>HSPA6</i> | rs10737548 | CC    | 89 | 6426±176 |        | 206 | 5548±133 |        |
|              |            | CT    | 13 | 7054±157 | 0.226  | 23  | 5126±121 | 0.178  |
|              |            | TT    | 1  | 7300     | 0.862  | 1   | 4000     | <0.001 |
|              |            | TT+CT | 14 | 7071±151 | 0.231  | 24  | 5079±120 | 0.111  |
|              |            | Trend |    |          | 0.255  |     |          | 0.063  |
| <i>FCGRT</i> | rs2946863  | GG    | 98 | 6504±177 |        | 223 | 5498±132 |        |
|              |            | CG    | 5  | 6700±995 | 0.255  | 7   | 5514±170 | 0.930  |
| <i>FCGRT</i> | rs2335534  | GG    | 98 | 6504±177 |        | 216 | 5473±131 |        |
|              |            | AG    | 5  | 6700±995 | 0.255  | 14  | 5900±149 | 0.482  |
| <i>FCGRT</i> | rs3810194  | TT    | 87 | 6569±183 |        | 203 | 5471±125 |        |
|              |            | CT    | 15 | 6320±105 | 0.532  | 27  | 5704±183 | 0.660  |
|              |            | CC    | 1  | 4600     | <0.001 |     |          |        |
|              |            | CC+CT | 16 | 6213±110 | 0.353  | 27  | 5704±183 | 0.660  |
|              |            | Trend |    |          | 0.219  |     |          | 0.660  |
| <i>FGF2</i>  | rs308447   | CC    | 79 | 6367±181 |        | 198 | 5510±133 |        |
|              |            | CT    | 23 | 6939±140 | 0.026  | 30  | 5513±130 | 0.869  |
|              |            | TT    | 1  | 8300     | <0.001 | 2   | 4200±155 | 0.169  |
|              |            | TT+CT | 24 | 6996±140 | 0.017  | 32  | 5431±133 | 0.577  |
|              |            | Trend |    |          | 0.008  |     |          | 0.397  |
| <i>FGF2</i>  | rs308428   | AA    | 72 | 6411±185 |        | 183 | 5548±136 |        |
|              |            | AG    | 18 | 6339±141 | 0.780  | 41  | 5310±980 | 0.356  |
|              |            | GG    | 13 | 7323±132 | 0.019  | 4   | 4075±911 | 0.013  |
|              |            | GG+AG | 31 | 6752±144 | 0.173  | 45  | 5200±102 | 0.135  |
|              |            | Trend |    |          | 0.047  |     |          | 0.051  |
| <i>FGF2</i>  | rs11938826 | CC    | 86 | 6520±180 |        | 185 | 5593±135 |        |
|              |            | CG    | 15 | 6387±141 | 0.673  | 43  | 5158±112 | 0.052  |
|              |            | GG    | 2  | 7200±155 | 0.196  | 2   | 4100±169 | 0.155  |
|              |            | GG+CG | 17 | 6482±140 | 0.457  | 45  | 5111±114 | 0.027  |
|              |            | Trend |    |          | 0.326  |     |          | 0.020  |
| <i>FGF2</i>  | rs167428   | TT    | 87 | 6524±176 |        | 190 | 5482±133 |        |
|              |            | CT    | 15 | 6500±171 | 0.693  | 38  | 5645±133 | 0.505  |
|              |            | CC    | 1  | 5800     | 0.610  | 2   | 4300±566 | 0.048  |
|              |            | CC+CT | 16 | 6456±166 | 0.715  | 40  | 5578±133 | 0.630  |
|              |            | Trend |    |          | 0.747  |     |          | 0.786  |
| <i>FGF2</i>  | rs308441   | CC    | 94 | 6526±173 |        | 198 | 5508±134 |        |
|              |            | CT    | 8  | 6463±200 | 0.976  | 29  | 5510±126 | 0.774  |
|              |            | TT    | 1  | 5800     | 0.488  | 2   | 4300±566 | 0.047  |
|              |            | TT+CT | 9  | 6389±188 | 0.943  | 31  | 5432±125 | 0.927  |
|              |            | Trend |    |          | 0.907  |     |          | 0.904  |
| <i>FGF2</i>  | rs17006215 | GG    | 95 | 6518±172 |        | 198 | 5508±134 |        |
|              |            | AG    | 7  | 6557±214 | 0.981  | 30  | 5520±123 | 0.776  |
|              |            | AA    | 1  | 5800     | 0.486  | 2   | 4300±566 | 0.046  |
|              |            | AA+AG | 8  | 6463±200 | 0.948  | 32  | 5444±124 | 0.930  |
|              |            | Trend |    |          | 0.911  |     |          | 0.900  |
| <i>FGF2</i>  | rs308379   | TT    | 39 | 6610±173 |        | 67  | 5569±142 |        |

|              |            |       |    |          |       |     |          |        |
|--------------|------------|-------|----|----------|-------|-----|----------|--------|
|              |            | AT    | 49 | 6443±184 | 0.573 | 108 | 5436±118 | 0.912  |
|              |            | AA    | 15 | 6493±147 | 0.550 | 54  | 5559±150 | 0.894  |
|              |            | AA+AT | 64 | 6455±175 | 0.507 | 162 | 5477±129 | 0.893  |
|              |            | Trend |    |          | 0.492 |     |          | 0.892  |
| <i>FGF2</i>  | rs3789138  | GG    | 34 | 6665±155 |       | 52  | 5669±150 |        |
|              |            | AG    | 47 | 6279±173 | 0.231 | 123 | 5441±132 | 0.536  |
|              |            | AA    | 22 | 6782±202 | 0.860 | 55  | 5465±116 | 0.855  |
|              |            | AA+AG | 69 | 6439±183 | 0.330 | 178 | 5449±127 | 0.607  |
|              |            | Trend |    |          | 0.758 |     |          | 0.846  |
| <i>FGF2</i>  | rs308388   | GG    | 41 | 6585±151 |       | 66  | 5547±148 |        |
|              |            | AG    | 46 | 6233±171 | 0.236 | 115 | 5491±132 | 0.920  |
|              |            | AA    | 15 | 7107±231 | 0.660 | 48  | 5444±114 | 0.897  |
|              |            | AA+AG | 61 | 6448±189 | 0.444 | 163 | 5477±127 | 0.905  |
|              |            | Trend |    |          | 0.974 |     |          | 0.894  |
| <i>FGF2</i>  | rs17006255 | AA    | 39 | 6387±129 |       | 68  | 5565±146 |        |
|              |            | AC    | 43 | 6400±191 | 0.609 | 111 | 5493±134 | 0.854  |
|              |            | CC    | 21 | 6981±207 | 0.484 | 51  | 5424±113 | 0.688  |
|              |            | CC+AC | 64 | 6591±197 | 0.925 | 162 | 5471±127 | 0.782  |
|              |            | Trend |    |          | 0.580 |     |          | 0.697  |
| <i>NUDT6</i> | rs11737764 | CC    | 93 | 6594±180 |       | 210 | 5513±133 |        |
|              |            | CT    | 9  | 5767±775 | 0.042 | 19  | 5421±133 | 0.785  |
|              |            | TT    | 1  | 5800     | 0.400 | 1   | 3900     | <0.001 |
|              |            | TT+CT | 10 | 5770±730 | 0.042 | 20  | 5345±134 | 0.924  |
|              |            | Trend |    |          | 0.066 |     |          | 0.916  |
| <i>NUDT6</i> | rs11098676 | CC    | 92 | 6605±180 |       | 211 | 5515±132 |        |
|              |            | CT    | 10 | 5740±735 | 0.018 | 18  | 5394±137 | 0.879  |
|              |            | TT    | 1  | 5800     | 0.377 | 1   | 3900     | <0.001 |
|              |            | TT+CT | 11 | 5745±698 | 0.019 | 19  | 5316±137 | 0.982  |
|              |            | Trend |    |          | 0.038 |     |          | 0.827  |
| <i>FOXJ2</i> | rs11057065 | CC    | 56 | 6213±154 |       | 123 | 5567±149 |        |
|              |            | CT    | 43 | 6958±193 | 0.057 | 91  | 5352±103 | 0.507  |
|              |            | TT    | 4  | 5950±146 | 0.828 | 15  | 5907±143 | 0.421  |
|              |            | TT+CT | 47 | 6872±190 | 0.087 | 106 | 5430±110 | 0.751  |
|              |            | Trend |    |          | 0.208 |     |          | 0.897  |
| <i>GPR44</i> | rs533116   | CC    | 83 | 6670±181 |       | 195 | 5506±133 |        |
|              |            | CT    | 18 | 6044±113 | 0.286 | 33  | 5555±131 | 0.969  |
|              |            | TT    | 2  | 4250±134 | 0.034 | 2   | 3850±71  | <0.001 |
|              |            | TT+CT | 20 | 5865±124 | 0.095 | 35  | 5457±134 | 0.696  |
|              |            | Trend |    |          | 0.041 |     |          | 0.485  |
| <i>ZP1</i>   | rs679682   | TT    | 55 | 6725±183 |       | 119 | 5403±129 |        |
|              |            | CT    | 36 | 6428±165 | 0.619 | 86  | 5671±136 | 0.340  |
|              |            | CC    | 12 | 5800±143 | 0.062 | 25  | 5360±135 | 0.816  |
|              |            | CC+CT | 48 | 6271±161 | 0.286 | 111 | 5601±136 | 0.487  |
|              |            | Trend |    |          | 0.108 |     |          | 0.789  |
| <i>ZP1</i>   | rs530880   | CC    | 89 | 6628±178 |       | 210 | 5538±133 |        |
|              |            | CT    | 12 | 6042±109 | 0.338 | 20  | 5090±127 | 0.186  |
|              |            | TT    | 2  | 4250±134 | 0.034 |     |          |        |
|              |            | TT+CT | 14 | 5786±125 | 0.111 | 20  | 5090±127 | 0.186  |
|              |            | Trend |    |          | 0.047 |     |          | 0.186  |

|             |            |       |     |          |       |     |          |        |
|-------------|------------|-------|-----|----------|-------|-----|----------|--------|
| <i>HES7</i> | rs1442849  | CC    | 39  | 6044±149 |       | 81  | 5560±128 |        |
|             |            | CT    | 47  | 6655±172 | 0.087 | 101 | 5566±136 | 0.727  |
|             |            | TT    | 17  | 7200±208 | 0.032 | 48  | 5252±133 | 0.121  |
|             |            | TT+CT | 64  | 6800±182 | 0.029 | 149 | 5465±135 | 0.336  |
|             |            | Trend |     |          | 0.020 |     |          | 0.143  |
| <i>HES7</i> | rs3027279  | GG    | 63  | 6746±182 |       | 154 | 5436±126 |        |
|             |            | GT    | 32  | 6325±164 | 0.376 | 65  | 5683±150 | 0.249  |
|             |            | TT    | 8   | 5438±894 | 0.006 | 11  | 5282±120 | 0.785  |
|             |            | TT+GT | 40  | 6148±156 | 0.141 | 76  | 5625±146 | 0.247  |
|             |            | Trend |     |          | 0.033 |     |          | 0.303  |
| <i>HGF</i>  | rs5745752  | CC    | 43  | 6670±192 |       | 97  | 5598±125 |        |
|             |            | CT    | 42  | 6526±163 | 0.897 | 111 | 5410±125 | 0.613  |
|             |            | TT    | 18  | 6111±152 | 0.169 | 22  | 5509±193 | 0.768  |
|             |            | TT+CT | 60  | 6402±160 | 0.530 | 133 | 5426±138 | 0.587  |
|             |            | Trend |     |          | 0.250 |     |          | 0.639  |
| <i>HGF</i>  | rs2074724  | TT    | 74  | 6353±148 |       | 161 | 5506±136 |        |
|             |            | CT    | 17  | 6471±253 | 0.870 | 64  | 5542±126 | 0.634  |
|             |            | CC    | 8   | 8138±144 | 0.007 | 5   | 4720±907 | <0.001 |
|             |            | CC+CT | 25  | 7004±235 | 0.401 | 69  | 5483±125 | 0.932  |
|             |            | Trend |     |          | 0.107 |     |          | 0.673  |
| <i>HGF</i>  | rs5745696  | CC    | 76  | 6446±172 |       | 164 | 5607±144 |        |
|             |            | CT    | 26  | 6727±182 | 0.591 | 61  | 5192±954 | 0.041  |
|             |            | TT    | 1   | 6100     | 0.986 | 5   | 5700±570 | 0.945  |
|             |            | TT+CT | 27  | 6704±179 | 0.600 | 66  | 5230±937 | 0.048  |
|             |            | Trend |     |          | 0.615 |     |          | 0.072  |
| <i>HGF</i>  | rs12707453 | AA    | 38  | 6632±200 |       | 110 | 5650±125 |        |
|             |            | AG    | 46  | 6511±158 | 0.711 | 100 | 5338±123 | 0.136  |
|             |            | GG    | 19  | 6284±159 | 0.297 | 20  | 5470±202 | 0.526  |
|             |            | GG+AG | 65  | 6445±157 | 0.516 | 120 | 5360±138 | 0.131  |
|             |            | Trend |     |          | 0.337 |     |          | 0.222  |
| <i>HGF</i>  | rs5745646  | TT    | 70  | 6363±145 |       | 147 | 5469±133 |        |
|             |            | CT    | 24  | 6658±244 | 0.722 | 78  | 5595±134 | 0.238  |
|             |            | CC    | 9   | 7300±148 | 0.079 | 4   | 5000±997 | 0.021  |
|             |            | CC+CT | 33  | 6833±221 | 0.398 | 82  | 5566±133 | 0.333  |
|             |            | Trend |     |          | 0.189 |     |          | 0.530  |
| <i>HGF</i>  | rs5745616  | CC    | 39  | 6733±196 |       | 104 | 5608±127 |        |
|             |            | CT    | 47  | 6411±158 | 0.243 | 105 | 5389±123 | 0.608  |
|             |            | TT    | 17  | 6294±163 | 0.204 | 20  | 5495±203 | 0.687  |
|             |            | TT+CT | 64  | 6380±159 | 0.172 | 125 | 5406±138 | 0.560  |
|             |            | Trend |     |          | 0.165 |     |          | 0.576  |
| <i>HGF</i>  | rs3735520  | GG    | 30  | 6420±161 |       | 75  | 5823±141 |        |
|             |            | AG    | 49  | 6520±182 | 0.757 | 116 | 5316±113 | 0.122  |
|             |            | AA    | 24  | 6617±179 | 0.895 | 38  | 5450±161 | 0.219  |
|             |            | AA+AG | 73  | 6552±179 | 0.862 | 154 | 5349±126 | 0.093  |
|             |            | Trend |     |          | 0.923 |     |          | 0.150  |
| <i>HGF</i>  | rs11763015 | GG    | 93  | 6453±166 |       | 209 | 5519±136 |        |
|             |            | GT    | 10  | 7080±237 | 0.384 | 21  | 5300±893 | 0.619  |
| <i>HGF</i>  | rs17501108 | GG    | 102 | 6530±174 |       | 220 | 5488±134 |        |
|             |            | GT    | 1   | 4800     | 0.005 | 8   | 6088±656 | 0.005  |



|               |           |       |     |          |        |     |          |        |
|---------------|-----------|-------|-----|----------|--------|-----|----------|--------|
| <i>HGF</i>    | rs7790870 | GG    | 52  | 6563±181 |        | 132 | 5599±124 |        |
|               |           | CG    | 40  | 6538±164 | 0.604  | 87  | 5276±116 | 0.323  |
|               |           | CC    | 11  | 6191±184 | 0.560  | 11  | 6055±277 | 0.741  |
|               |           | CC+CG | 51  | 6463±167 | 0.510  | 98  | 5363±143 | 0.474  |
|               |           | Trend |     |          | 0.487  |     |          | 0.779  |
| <i>HGF</i>    | rs1558001 | CC    | 39  | 6951±197 |        | 83  | 5331±139 |        |
|               |           | CT    | 45  | 6140±158 | 0.020  | 113 | 5550±120 | 0.283  |
|               |           | TT    | 19  | 6500±143 | 0.659  | 34  | 5735±156 | 0.535  |
|               |           | TT+CT | 64  | 6247±153 | 0.056  | 147 | 5593±129 | 0.273  |
|               |           | Trend |     |          | 0.327  |     |          | 0.388  |
| <i>ICAM1</i>  | rs281432  | CC    | 37  | 6489±164 |        | 109 | 5581±131 |        |
|               |           | CG    | 30  | 6137±173 | 0.134  | 100 | 5341±121 | 0.073  |
|               |           | GG    | 35  | 6851±184 | 0.420  | 20  | 5630±167 | 0.526  |
|               |           | GG+CG | 65  | 6522±181 | 0.744  | 120 | 5389±129 | 0.083  |
|               |           | Trend |     |          | 0.455  |     |          | 0.170  |
| <i>ICAM1</i>  | rs3093032 | CC    | 85  | 6634±179 |        | 203 | 5491±128 |        |
|               |           | CT    | 17  | 5776±122 | 0.147  | 26  | 5427±154 | 0.813  |
|               |           | TT    | 1   | 8800     | <0.001 | 1   | 8900     | <0.001 |
|               |           | TT+CT | 18  | 5944±138 | 0.306  | 27  | 5556±165 | 0.903  |
|               |           | Trend |     |          | 0.651  |     |          | 0.652  |
| <i>ICAM1</i>  | rs3093030 | CC    | 59  | 6305±168 |        | 149 | 5507±129 |        |
|               |           | CT    | 37  | 6851±165 | 0.235  | 70  | 5524±146 | 0.657  |
|               |           | TT    | 7   | 6486±256 | 0.842  | 11  | 5227±917 | 0.785  |
|               |           | TT+CT | 44  | 6793±179 | 0.365  | 81  | 5484±140 | 0.639  |
|               |           | Trend |     |          | 0.658  |     |          | 0.642  |
| <i>ICAM4</i>  | rs281438  | TT    | 75  | 6524±173 |        | 175 | 5575±132 |        |
|               |           | GT    | 27  | 6400±176 | 0.746  | 54  | 5187±125 | 0.032  |
|               |           | GG    | 1   | 8800     | <0.001 | 1   | 8900     | <0.001 |
|               |           | GG+GT | 28  | 6486±179 | 0.613  | 55  | 5255±134 | 0.075  |
|               |           | Trend |     |          | 0.444  |     |          | 0.227  |
| <i>ICAM5</i>  | rs281440  | GG    | 30  | 6340±176 |        | 77  | 5645±128 |        |
|               |           | AG    | 47  | 6391±155 | 0.993  | 107 | 5445±134 | 0.090  |
|               |           | AA    | 26  | 6935±202 | 0.284  | 45  | 5398±138 | 0.121  |
|               |           | AA+AG | 73  | 6585±173 | 0.614  | 152 | 5431±135 | 0.061  |
|               |           | Trend |     |          | 0.303  |     |          | 0.088  |
| <i>ICAM2</i>  | rs3181027 | GG    | 55  | 6493±170 |        | 120 | 5569±148 |        |
|               |           | GT    | 36  | 6439±192 | 0.673  | 88  | 5457±119 | 0.755  |
|               |           | TT    | 12  | 6833±134 | 0.292  | 21  | 5319±950 | 0.584  |
|               |           | TT+GT | 48  | 6538±179 | 0.982  | 109 | 5430±114 | 0.659  |
|               |           | Trend |     |          | 0.583  |     |          | 0.590  |
| <i>ICAM2</i>  | rs3764868 | GG    | 49  | 6265±162 |        | 116 | 5400±134 |        |
|               |           | AG    | 47  | 6604±175 | 0.485  | 100 | 5660±127 | 0.123  |
|               |           | AA    | 7   | 7643±222 | 0.092  | 14  | 5164±156 | 0.797  |
|               |           | AA+AG | 54  | 6739±182 | 0.331  | 114 | 5599±131 | 0.195  |
|               |           | Trend |     |          | 0.164  |     |          | 0.458  |
| <i>RAVER1</i> | rs3181049 | GG    | 87  | 6643±170 |        | 193 | 5482±128 |        |
|               |           | AG    | 16  | 5813±182 | 0.073  | 37  | 5584±155 | 0.953  |
| <i>ICAM3</i>  | rs2230399 | CC    | 103 | 6514±174 |        | 224 | 5509±134 |        |
|               |           | CG    |     |          |        | 4   | 5275±411 | 0.339  |

|               |            |       |     |          |        |       |          |       |
|---------------|------------|-------|-----|----------|--------|-------|----------|-------|
| <i>ICAM3</i>  | rs281413   | GG    | 76  | 6670±178 |        | 192   | 5518±128 |       |
|               |            | AG    | 26  | 5969±148 | 0.139  | 38    | 5400±154 | 0.532 |
|               |            | AA    | 1   | 8800     | <0.001 |       |          |       |
|               |            | AA+AG | 27  | 6074±155 | 0.232  | 38    | 5400±154 | 0.532 |
|               |            | Trend |     |          |        | 0.477 |          | 0.532 |
| <i>ICAM3</i>  | rs2304240  | GG    | 73  | 6484±176 |        | 156   | 5544±138 |       |
|               |            | AG    | 28  | 6554±175 | 0.986  | 68    | 5300±109 | 0.138 |
|               |            | AA    | 2   | 7050±778 | 0.133  | 6     | 6583±199 | 0.560 |
|               |            | AA+AG | 30  | 6587±170 | 0.945  | 74    | 5404±122 | 0.227 |
|               |            | Trend |     |          |        | 0.854 |          | 0.473 |
| <i>ICAM3</i>  | rs3176766  | GG    | 77  | 6669±165 |        | 173   | 5472±124 |       |
|               |            | AG    | 25  | 6044±198 | 0.106  | 56    | 5589±157 | 0.751 |
|               |            | AA    | 1   | 6300     | 0.754  | 1     | 5000     | 0.056 |
|               |            | AA+AG | 26  | 6054±194 | 0.105  | 57    | 5579±156 | 0.725 |
|               |            | Trend |     |          |        | 0.110 |          | 0.689 |
| <i>ICAM3</i>  | rs281414   | GG    | 78  | 6667±176 |        | 194   | 5521±128 |       |
|               |            | AG    | 24  | 5921±153 | 0.133  | 36    | 5381±156 | 0.522 |
|               |            | AA    | 1   | 8800     | <0.001 |       |          |       |
|               |            | AA+AG | 25  | 6036±161 | 0.231  | 36    | 5381±156 | 0.522 |
|               |            | Trend |     |          |        | 0.481 |          | 0.522 |
| <i>TYK2</i>   | rs4611572  | GG    | 38  | 7050±176 |        | 88    | 5617±143 |       |
|               |            | CG    | 50  | 6080±167 | 0.005  | 110   | 5303±110 | 0.177 |
|               |            | CC    | 15  | 6600±157 | 0.546  | 32    | 5847±166 | 0.826 |
|               |            | CC+CG | 65  | 6200±165 | 0.012  | 142   | 5425±126 | 0.328 |
|               |            | Trend |     |          |        | 0.164 |          | 0.796 |
| <i>IL11RA</i> | rs11575584 | GG    | 100 | 6500±176 |        | 223   | 5486±133 |       |
|               |            | AG    | 2   | 6450±212 | 0.877  | 7     | 5900±130 | 0.963 |
|               |            | AA    | 1   | 8000     | <0.001 |       |          |       |
|               |            | AA+AG | 3   | 6967±907 | 0.342  | 7     | 5900±130 | 0.963 |
|               |            | Trend |     |          |        | 0.069 |          | 0.963 |
| <i>IL11RA</i> | rs913836   | TT    | 73  | 6641±160 |        | 155   | 5551±142 |       |
|               |            | CT    | 28  | 6011±174 | 0.104  | 69    | 5420±115 | 0.684 |
|               |            | CC    | 2   | 8900±480 | 0.445  | 6     | 5050±327 | 0.057 |
|               |            | CC+CT | 30  | 6203±204 | 0.220  | 75    | 5391±111 | 0.557 |
|               |            | Trend |     |          |        | 0.510 |          | 0.403 |
| <i>IL11RA</i> | rs4879816  | CC    | 97  | 6545±174 |        | 221   | 5461±131 |       |
|               |            | AC    | 6   | 6000±183 | 0.481  | 8     | 6425±148 | 0.067 |
| <i>IL8</i>    | rs4694178  | AA    | 34  | 6591±145 |        | 88    | 5376±125 |       |
|               |            | AC    | 43  | 6535±195 | 0.578  | 105   | 5668±146 | 0.042 |
|               |            | CC    | 26  | 6377±177 | 0.508  | 36    | 5297±107 | 0.590 |
|               |            | CC+AC | 69  | 6475±187 | 0.479  | 141   | 5573±137 | 0.066 |
|               |            | Trend |     |          |        | 0.501 |          | 0.277 |
| <i>IL8RB</i>  | rs4674257  | AA    | 42  | 6660±164 |        | 75    | 5364±136 |       |
|               |            | AG    | 49  | 6518±192 | 0.509  | 109   | 5522±119 | 0.244 |
|               |            | GG    | 12  | 5983±117 | 0.121  | 46    | 5663±157 | 0.302 |
|               |            | GG+AG | 61  | 6413±180 | 0.313  | 155   | 5564±131 | 0.202 |
|               |            | Trend |     |          |        | 0.150 |          | 0.255 |
| <i>IL8RB</i>  | rs6761387  | CC    | 100 | 6521±171 |        | 216   | 5506±130 |       |
|               |            | CT    | 3   | 6267±308 | 0.634  | 13    | 5462±175 | 0.885 |

|              |            |       |     |          |       |     |          |        |
|--------------|------------|-------|-----|----------|-------|-----|----------|--------|
| <i>IL8RB</i> | rs4674261  | GG    | 61  | 6749±173 |       | 120 | 5476±137 |        |
|              |            | CG    | 38  | 6187±175 | 0.088 | 93  | 5544±130 | 0.376  |
|              |            | CC    | 4   | 6025±135 | 0.308 | 16  | 5519±119 | 0.415  |
|              |            | CC+CG | 42  | 6171±170 | 0.069 | 109 | 5540±128 | 0.312  |
|              |            | Trend |     |          | 0.067 |     |          | 0.282  |
| <i>IL8RA</i> | rs1008563  | GG    | 69  | 6772±187 |       | 136 | 5462±133 |        |
|              |            | AG    | 32  | 5947±129 | 0.014 | 77  | 5592±136 | 0.269  |
|              |            | AA    | 2   | 6650±162 | 0.937 | 16  | 5344±123 | 0.756  |
|              |            | AA+AG | 34  | 5988±129 | 0.019 | 93  | 5549±134 | 0.283  |
|              |            | Trend |     |          | 0.046 |     |          | 0.374  |
| <i>IL8RA</i> | rs1008562  | CC    | 50  | 6706±183 |       | 92  | 5410±134 |        |
|              |            | CG    | 44  | 6395±169 | 0.447 | 105 | 5553±120 | 0.391  |
|              |            | GG    | 9   | 6022±136 | 0.248 | 33  | 5573±166 | 0.528  |
|              |            | GG+CG | 53  | 6332±164 | 0.318 | 138 | 5558±132 | 0.358  |
|              |            | Trend |     |          | 0.229 |     |          | 0.415  |
| <i>IL8RA</i> | rs2854386  | CC    | 82  | 6485±172 |       | 175 | 5423±126 |        |
|              |            | CG    | 21  | 6624±182 | 0.647 | 54  | 5770±149 | 0.347  |
|              |            | GG    |     |          |       | 1   | 4000     | <0.001 |
|              |            | GG+CG | 21  | 6624±182 | 0.647 | 55  | 5738±150 | 0.407  |
|              |            | Trend |     |          | 0.647 |     |          | 0.495  |
| <i>IRAK2</i> | rs457414   | AA    | 61  | 6462±186 |       | 130 | 5465±139 |        |
|              |            | AC    | 37  | 6611±164 | 0.740 | 83  | 5649±123 | 0.123  |
|              |            | CC    | 5   | 6420±934 | 0.619 | 17  | 5018±123 | 0.050  |
|              |            | CC+AC | 42  | 6588±157 | 0.704 | 100 | 5542±124 | 0.442  |
|              |            | Trend |     |          | 0.656 |     |          | 0.789  |
| <i>IRAK2</i> | rs11465853 | GG    | 37  | 6746±194 |       | 83  | 5590±130 |        |
|              |            | CG    | 47  | 6300±164 | 0.249 | 98  | 5583±142 | 0.472  |
|              |            | CC    | 19  | 6589±157 | 0.869 | 48  | 5190±115 | 0.114  |
|              |            | CC+CG | 66  | 6383±161 | 0.407 | 146 | 5453±135 | 0.232  |
|              |            | Trend |     |          | 0.873 |     |          | 0.121  |
| <i>IRAK2</i> | rs3844280  | CC    | 102 | 6491±173 |       | 223 | 5491±131 |        |
|              |            | CT    | 1   | 8800     | 0.015 | 7   | 5729±191 | 0.968  |
| <i>IRAK2</i> | rs708030   | CC    | 77  | 6578±158 |       | 179 | 5510±136 |        |
|              |            | CT    | 24  | 6296±216 | 0.747 | 48  | 5490±124 | 0.551  |
|              |            | TT    | 2   | 6650±304 | 0.670 | 3   | 4967±112 | 0.011  |
|              |            | TT+CT | 26  | 6323±216 | 0.667 | 51  | 5459±123 | 0.448  |
|              |            | Trend |     |          | 0.621 |     |          | 0.333  |
| <i>IRAK2</i> | rs2619508  | TT    | 73  | 6553±183 |       | 156 | 5554±139 |        |
|              |            | GT    | 28  | 6375±131 | 0.884 | 59  | 5442±125 | 0.847  |
|              |            | GG    | 2   | 7000±424 | 0.624 | 15  | 5140±792 | 0.184  |
|              |            | GG+GT | 30  | 6417±149 | 0.972 | 74  | 5381±117 | 0.831  |
|              |            | Trend |     |          | 0.832 |     |          | 0.518  |
| <i>IRAK2</i> | rs1169670  | GG    | 102 | 6511±174 |       | 223 | 5488±133 |        |
|              |            | CG    | 1   | 6800     | 0.332 | 7   | 5843±105 | 0.294  |
| <i>IRAK2</i> | rs155266   | AA    | 52  | 6404±161 |       | 128 | 5638±139 |        |
|              |            | AT    | 43  | 6709±180 | 0.228 | 82  | 5396±125 | 0.430  |
|              |            | TT    | 8   | 6175±225 | 0.978 | 19  | 5063±114 | 0.076  |
|              |            | TT+AT | 51  | 6625±186 | 0.310 | 101 | 5334±123 | 0.215  |
|              |            | Trend |     |          | 0.569 |     |          | 0.101  |

|              |            |       |     |          |        |     |          |        |
|--------------|------------|-------|-----|----------|--------|-----|----------|--------|
| <i>IRAK2</i> | rs1144911  | GG    | 102 | 6511±174 |        | 224 | 5490±133 |        |
|              |            | AG    | 1   | 6800     | 0.332  | 4   | 6200±121 | 0.070  |
| <i>IRAK2</i> | rs263410   | AA    | 31  | 6839±167 |        | 86  | 5599±131 |        |
|              |            | AC    | 53  | 6398±177 | 0.164  | 106 | 5426±133 | 0.918  |
|              |            | CC    | 19  | 6305±175 | 0.460  | 38  | 5474±138 | 0.948  |
|              |            | CC+AC | 72  | 6374±176 | 0.176  | 144 | 5439±134 | 0.955  |
|              |            | Trend |     |          | 0.363  |     |          | 0.981  |
| <i>IRAK2</i> | rs263413   | GG    | 49  | 6800±185 |        | 119 | 5464±131 |        |
|              |            | AG    | 44  | 6484±166 | 0.359  | 95  | 5498±133 | 0.338  |
|              |            | AA    | 10  | 5240±731 | <0.001 | 16  | 5763±149 | 0.632  |
|              |            | AA+AG | 54  | 6254±160 | 0.092  | 111 | 5536±135 | 0.315  |
|              |            | Trend |     |          | 0.008  |     |          | 0.361  |
| <i>IRAK2</i> | rs7373858  | GG    | 78  | 6565±173 |        | 166 | 5534±141 |        |
|              |            | AG    | 15  | 6253±169 | 0.454  | 54  | 5513±110 | 0.622  |
|              |            | AA    | 4   | 7800±262 | 0.104  | 7   | 5000±490 | 0.142  |
|              |            | AA+AG | 19  | 6579±195 | 0.918  | 61  | 5454±105 | 0.829  |
|              |            | Trend |     |          | 0.483  |     |          | 0.884  |
| <i>IRAK2</i> | rs2302862  | TT    | 69  | 6552±174 |        | 162 | 5556±141 |        |
|              |            | CT    | 29  | 6310±156 | 0.519  | 57  | 5393±113 | 0.870  |
|              |            | CC    | 5   | 7160±268 | 0.374  | 10  | 5300±964 | 0.593  |
|              |            | CC+CT | 34  | 6435±174 | 0.831  | 67  | 5379±110 | 0.762  |
|              |            | Trend |     |          | 0.811  |     |          | 0.665  |
| <i>IRAK2</i> | rs3844283  | CC    | 69  | 6500±167 |        | 161 | 5567±143 |        |
|              |            | CG    | 31  | 6558±188 | 0.993  | 59  | 5405±108 | 0.987  |
|              |            | GG    | 3   | 6367±240 | 0.645  | 7   | 5000±490 | 0.135  |
|              |            | GG+CG | 34  | 6541±188 | 0.908  | 66  | 5362±104 | 0.795  |
|              |            | Trend |     |          | 0.803  |     |          | 0.567  |
| <i>IRAK2</i> | rs779905   | TT    | 36  | 6661±187 |        | 103 | 5537±132 |        |
|              |            | CT    | 50  | 6672±171 | 0.601  | 95  | 5471±134 | 0.396  |
|              |            | CC    | 17  | 5735±135 | 0.051  | 31  | 5358±124 | 0.734  |
|              |            | CC+CT | 67  | 6434±167 | 0.286  | 126 | 5443±131 | 0.577  |
|              |            | Trend |     |          | 0.083  |     |          | 0.919  |
| <i>IRAK2</i> | rs779904   | TT    | 64  | 6703±190 |        | 163 | 5454±122 |        |
|              |            | CT    | 35  | 6211±144 | 0.064  | 56  | 5739±161 | 0.012  |
|              |            | CC    | 4   | 6125±117 | 0.225  | 10  | 4840±113 | 0.014  |
|              |            | CC+CT | 39  | 6203±140 | 0.043  | 66  | 5603±158 | 0.129  |
|              |            | Trend |     |          | 0.040  |     |          | 0.645  |
| <i>IRAK2</i> | rs776514   | CC    | 64  | 6711±190 |        | 157 | 5457±123 |        |
|              |            | CT    | 33  | 6264±143 | 0.154  | 63  | 5706±155 | 0.039  |
|              |            | TT    | 6   | 5783±123 | 0.042  | 10  | 4840±113 | 0.013  |
|              |            | TT+CT | 39  | 6190±139 | 0.054  | 73  | 5588±152 | 0.239  |
|              |            | Trend |     |          | 0.023  |     |          | 0.840  |
| <i>IRAK2</i> | rs708035   | AA    | 101 | 6515±175 |        | 227 | 5483±133 |        |
|              |            | AT    | 2   | 6450±495 | 0.983  | 3   | 6700±854 | <0.001 |
| <i>IRAK2</i> | rs11706450 | TT    | 57  | 6730±192 |        | 146 | 5486±124 |        |
|              |            | CT    | 37  | 6332±150 | 0.105  | 70  | 5606±153 | 0.120  |
|              |            | CC    | 9   | 5889±122 | 0.065  | 14  | 5093±112 | 0.122  |
|              |            | CC+CT | 46  | 6246±145 | 0.050  | 84  | 5520±147 | 0.366  |
|              |            | Trend |     |          | 0.034  |     |          | 0.913  |

|              |            |       |    |          |       |     |          |        |
|--------------|------------|-------|----|----------|-------|-----|----------|--------|
| <i>IRAK2</i> | rs713016   | TT    | 42 | 6655±201 |       | 133 | 5514±126 |        |
|              |            | CT    | 38 | 6505±159 | 0.312 | 75  | 5477±142 | 0.481  |
|              |            | CC    | 21 | 6267±153 | 0.145 | 18  | 5228±119 | 0.283  |
|              |            | CC+CT | 59 | 6420±156 | 0.185 | 93  | 5429±138 | 0.794  |
|              |            | Trend |    |          | 0.139 |     |          | 0.761  |
| <i>IRAK3</i> | rs1732893  | AA    | 36 | 6342±176 |       | 72  | 5431±128 |        |
|              |            | AC    | 48 | 6646±180 | 0.472 | 117 | 5622±144 | 0.553  |
|              |            | CC    | 19 | 6505±157 | 0.680 | 40  | 5290±103 | 0.777  |
|              |            | CC+AC | 67 | 6606±173 | 0.496 | 157 | 5538±135 | 0.716  |
|              |            | Trend |    |          | 0.620 |     |          | 0.934  |
| <i>IRAK3</i> | rs1436849  | TT    | 65 | 6585±187 |       | 136 | 5543±139 |        |
|              |            | CT    | 33 | 6355±151 | 0.435 | 86  | 5498±126 | 0.537  |
|              |            | CC    | 5  | 6640±156 | 0.872 | 7   | 4614±662 | 0.003  |
|              |            | CC+CT | 38 | 6392±150 | 0.449 | 93  | 5431±124 | 0.351  |
|              |            | Trend |    |          | 0.523 |     |          | 0.176  |
| <i>IRAK3</i> | rs11176078 | TT    | 46 | 6670±177 |       | 103 | 5346±120 |        |
|              |            | CT    | 44 | 6343±159 | 0.476 | 104 | 5661±144 | 0.171  |
|              |            | CC    | 13 | 6538±214 | 0.866 | 23  | 5452±129 | 0.843  |
|              |            | CC+CT | 57 | 6388±171 | 0.527 | 127 | 5623±141 | 0.210  |
|              |            | Trend |    |          | 0.695 |     |          | 0.395  |
| <i>IRAK3</i> | rs2701652  | GG    | 78 | 6594±178 |       | 168 | 5561±135 |        |
|              |            | CG    | 25 | 6264±161 | 0.119 | 60  | 5335±127 | 0.243  |
|              |            | CC    |    |          |       | 2   | 5200±566 | 0.039  |
|              |            | CC+CG | 25 | 6264±161 | 0.119 | 62  | 5331±125 | 0.216  |
|              |            | Trend |    |          | 0.119 |     |          | 0.187  |
| <i>IRAK3</i> | rs1168758  | CC    | 41 | 6405±187 |       | 83  | 5457±130 |        |
|              |            | CG    | 46 | 6680±174 | 0.501 | 108 | 5575±145 | 0.732  |
|              |            | GG    | 16 | 6313±139 | 0.950 | 39  | 5377±101 | 0.879  |
|              |            | GG+CG | 62 | 6585±165 | 0.607 | 147 | 5522±134 | 0.743  |
|              |            | Trend |    |          | 0.854 |     |          | 0.813  |
| <i>IRAK3</i> | rs1732877  | CC    | 44 | 6511±143 |       | 59  | 5495±108 |        |
|              |            | CT    | 37 | 6781±204 | 0.559 | 118 | 5590±148 | 0.823  |
|              |            | TT    | 22 | 6068±174 | 0.186 | 50  | 5222±106 | 0.504  |
|              |            | TT+CT | 59 | 6515±195 | 0.765 | 168 | 5480±138 | 0.675  |
|              |            | Trend |    |          | 0.297 |     |          | 0.511  |
| <i>IRAK3</i> | rs1152888  | GG    | 43 | 6453±187 |       | 89  | 5413±128 |        |
|              |            | AG    | 44 | 6666±174 | 0.528 | 106 | 5551±143 | 0.767  |
|              |            | AA    | 16 | 6256±140 | 0.756 | 35  | 5557±112 | 0.520  |
|              |            | AA+AG | 60 | 6557±165 | 0.689 | 141 | 5552±136 | 0.638  |
|              |            | Trend |    |          | 0.992 |     |          | 0.531  |
| <i>IRAK3</i> | rs3782347  | AA    | 83 | 6435±167 |       | 186 | 5459±132 |        |
|              |            | AG    | 19 | 6789±205 | 0.576 | 42  | 5702±139 | 0.524  |
|              |            | GG    | 1  | 7800     | 0.002 | 1   | 5500     | 0.459  |
|              |            | GG+AG | 20 | 6840±201 | 0.472 | 43  | 5698±137 | 0.515  |
|              |            | Trend |    |          | 0.372 |     |          | 0.505  |
| <i>IRAK3</i> | rs17826057 | GG    | 87 | 6494±162 |       | 195 | 5509±135 |        |
|              |            | AG    | 16 | 6619±233 | 0.852 | 33  | 5515±121 | 0.638  |
|              |            | AA    |    |          |       | 2   | 4200±424 | <0.001 |
|              |            | AA+AG | 16 | 6619±233 | 0.852 | 35  | 5440±122 | 0.874  |

|              |            |       |     |          |        |     |          |       |
|--------------|------------|-------|-----|----------|--------|-----|----------|-------|
|              |            | Trend |     |          | 0.852  |     |          | 0.859 |
| <i>IRAK3</i> | rs1152912  | GG    | 30  | 6677±172 |        | 80  | 5314±135 |       |
|              |            | AG    | 62  | 6519±175 | 0.670  | 112 | 5627±142 | 0.110 |
|              |            | AA    | 11  | 6036±176 | 0.317  | 37  | 5543±907 | 0.184 |
|              |            | AA+AG | 73  | 6447±175 | 0.579  | 149 | 5606±131 | 0.092 |
|              |            | Trend |     |          | 0.355  |     |          | 0.115 |
| <i>IRAK3</i> | rs1152918  | CC    | 45  | 6382±184 |        | 95  | 5385±132 |       |
|              |            | CT    | 46  | 6778±164 | 0.271  | 109 | 5590±143 | 0.312 |
|              |            | TT    | 12  | 5992±167 | 0.748  | 26  | 5531±822 | 0.230 |
|              |            | TT+CT | 58  | 6616±166 | 0.435  | 135 | 5579±133 | 0.239 |
|              |            | Trend |     |          | 0.832  |     |          | 0.186 |
| <i>IRAK3</i> | rs10506481 | TT    | 100 | 6544±174 |        | 217 | 5507±134 |       |
|              |            | CT    | 3   | 5500±137 | 0.029  | 12  | 5317±123 | 0.915 |
| <i>IRAK4</i> | rs4251460  | AA    | 69  | 6475±169 |        | 165 | 5588±139 |       |
|              |            | AC    | 23  | 6274±186 | 0.680  | 59  | 5308±115 | 0.890 |
|              |            | CC    | 8   | 6838±145 | 0.346  | 5   | 4740±627 | 0.002 |
|              |            | CC+AC | 31  | 6419±176 | 0.980  | 64  | 5264±112 | 0.674 |
|              |            | Trend |     |          | 0.701  |     |          | 0.419 |
| <i>IRAK4</i> | rs4238087  | AA    | 62  | 6490±194 |        | 165 | 5639±138 |       |
|              |            | AG    | 36  | 6447±135 | 0.875  | 59  | 5098±105 | 0.010 |
|              |            | GG    | 5   | 7280±171 | 0.228  | 5   | 5820±177 | 0.858 |
|              |            | GG+AG | 41  | 6549±140 | 0.628  | 64  | 5155±112 | 0.015 |
|              |            | Trend |     |          | 0.395  |     |          | 0.057 |
| <i>IRAK4</i> | rs1461567  | GG    | 45  | 6749±170 |        | 57  | 5277±108 |       |
|              |            | AG    | 39  | 6331±169 | 0.305  | 113 | 5419±129 | 0.404 |
|              |            | AA    | 19  | 6332±194 | 0.454  | 59  | 5859±155 | 0.102 |
|              |            | AA+AG | 58  | 6331±176 | 0.278  | 172 | 5570±140 | 0.193 |
|              |            | Trend |     |          | 0.355  |     |          | 0.102 |
| <i>IRAK4</i> | rs4251513  | CC    | 36  | 6472±165 |        | 102 | 5592±140 |       |
|              |            | CG    | 48  | 6408±196 | 0.713  | 98  | 5461±134 | 0.297 |
|              |            | GG    | 19  | 6858±128 | 0.329  | 30  | 5303±101 | 0.314 |
|              |            | GG+CG | 67  | 6536±179 | 0.993  | 128 | 5424±127 | 0.244 |
|              |            | Trend |     |          | 0.503  |     |          | 0.234 |
| <i>PTK9</i>  | rs17121283 | CC    | 84  | 6512±179 |        | 183 | 5536±138 |       |
|              |            | CT    | 18  | 6528±156 | 0.936  | 40  | 5458±114 | 0.782 |
|              |            | TT    | 1   | 6400     | 0.624  | 7   | 4771±553 | 0.013 |
|              |            | TT+CT | 19  | 6521±152 | 0.958  | 47  | 5355±110 | 0.889 |
|              |            | Trend |     |          | 0.982  |     |          | 0.553 |
| <i>ITGB2</i> | rs440555   | GG    | 74  | 6554±178 |        | 160 | 5429±132 |       |
|              |            | AG    | 28  | 6479±164 | 0.944  | 65  | 5638±135 | 0.169 |
|              |            | AA    | 1   | 4500     | <0.001 | 4   | 5525±119 | 0.131 |
|              |            | AA+AG | 29  | 6410±165 | 0.775  | 69  | 5632±134 | 0.154 |
|              |            | Trend |     |          | 0.586  |     |          | 0.140 |
| <i>ITGB2</i> | rs441019   | TT    | 22  | 6636±176 |        | 61  | 5410±131 |       |
|              |            | AT    | 56  | 6202±157 | 0.456  | 113 | 5558±138 | 0.502 |
|              |            | AA    | 25  | 7104±196 | 0.371  | 55  | 5498±125 | 0.518 |
|              |            | AA+AT | 81  | 6480±174 | 0.964  | 168 | 5538±134 | 0.462 |
|              |            | Trend |     |          | 0.333  |     |          | 0.510 |
| <i>ITGB2</i> | rs2117341  | GG    | 84  | 6437±173 |        | 174 | 5492±134 |       |

|              |           |       |    |          |        |     |          |        |
|--------------|-----------|-------|----|----------|--------|-----|----------|--------|
|              |           | AG    | 19 | 6853±175 | 0.269  | 53  | 5562±130 | 0.762  |
|              |           | AA    |    |          |        | 2   | 5000±424 | 0.611  |
|              |           | AA+AG | 19 | 6853±175 | 0.269  | 55  | 5542±128 | 0.783  |
|              |           | Trend |    |          | 0.269  |     |          | 0.806  |
| <i>ITGB2</i> | rs125810  | GG    | 29 | 6469±175 |        | 103 | 5430±127 |        |
|              |           | AG    | 61 | 6461±163 | 0.605  | 94  | 5580±143 | 0.396  |
|              |           | AA    | 13 | 6862±226 | 0.696  | 33  | 5482±121 | 0.959  |
|              |           | AA+AG | 74 | 6531±174 | 0.579  | 127 | 5554±137 | 0.476  |
|              |           | Trend |    |          | 0.632  |     |          | 0.691  |
| <i>ITGB2</i> | rs235325  | AA    | 26 | 6592±119 |        | 87  | 5485±132 |        |
|              |           | AG    | 54 | 6319±192 | 0.420  | 93  | 5631±135 | 0.332  |
|              |           | GG    | 23 | 6883±180 | 0.726  | 50  | 5276±129 | 0.208  |
|              |           | GG+AG | 77 | 6487±189 | 0.648  | 143 | 5507±134 | 0.912  |
|              |           | Trend |    |          | 0.708  |     |          | 0.340  |
| <i>ITGB2</i> | rs4818740 | AA    | 41 | 6915±207 |        | 95  | 5489±129 |        |
|              |           | AT    | 51 | 6206±148 | 0.179  | 100 | 5463±126 | 0.807  |
|              |           | TT    | 11 | 6445±126 | 0.108  | 35  | 5626±160 | 0.814  |
|              |           | TT+AT | 62 | 6248±143 | 0.134  | 135 | 5505±136 | 0.776  |
|              |           | Trend |    |          | 0.093  |     |          | 0.784  |
| <i>ITGB2</i> | rs235328  | GG    | 53 | 6513±152 |        | 151 | 5583±130 |        |
|              |           | CG    | 40 | 6363±194 | 0.671  | 61  | 5318±132 | 0.171  |
|              |           | CC    | 10 | 7120±196 | 0.489  | 18  | 5406±155 | 0.437  |
|              |           | CC+CG | 50 | 6514±195 | 0.937  | 79  | 5338±137 | 0.137  |
|              |           | Trend |    |          | 0.721  |     |          | 0.199  |
| <i>ITGB2</i> | rs2838727 | CC    | 81 | 6569±171 |        | 172 | 5549±138 |        |
|              |           | CT    | 21 | 6105±164 | 0.226  | 55  | 5356±116 | 0.377  |
|              |           | TT    |    |          |        | 2   | 5600±127 | 0.288  |
|              |           | TT+CT | 21 | 6105±164 | 0.226  | 57  | 5365±115 | 0.435  |
|              |           | Trend |    |          | 0.226  |     |          | 0.545  |
| <i>ITGB2</i> | rs170963  | CC    | 65 | 6320±165 |        | 144 | 5422±135 |        |
|              |           | CT    | 31 | 6703±192 | 0.257  | 65  | 5606±130 | 0.212  |
|              |           | TT    | 7  | 7471±140 | 0.014  | 19  | 5558±118 | 0.586  |
|              |           | TT+CT | 38 | 6845±185 | 0.087  | 84  | 5595±126 | 0.207  |
|              |           | Trend |    |          | 0.025  |     |          | 0.272  |
| <i>ITGB2</i> | rs2838729 | GG    | 50 | 6382±167 |        | 95  | 5594±149 |        |
|              |           | AG    | 45 | 6527±182 | 0.403  | 113 | 5404±118 | 0.624  |
|              |           | AA    | 8  | 7263±164 | 0.056  | 21  | 5629±129 | 0.452  |
|              |           | AA+AG | 53 | 6638±180 | 0.220  | 134 | 5439±120 | 0.819  |
|              |           | Trend |    |          | 0.089  |     |          | 0.802  |
| <i>ITGB2</i> | rs2026882 | CC    | 83 | 6376±174 |        | 188 | 5549±133 |        |
|              |           | CT    | 19 | 6995±162 | 0.018  | 40  | 5190±126 | 0.325  |
|              |           | TT    | 1  | 8800     | <0.001 | 2   | 6950±148 | <0.001 |
|              |           | TT+CT | 20 | 7085±163 | 0.008  | 42  | 5274±131 | 0.464  |
|              |           | Trend |    |          | 0.002  |     |          | 0.671  |
| <i>ITGB2</i> | rs3746972 | AA    | 81 | 6359±176 |        | 182 | 5589±132 |        |
|              |           | AG    | 21 | 7000±156 | 0.011  | 46  | 5078±125 | 0.051  |
|              |           | GG    | 1  | 8800     | <0.001 | 2   | 6950±148 | <0.001 |
|              |           | GG+AG | 22 | 7082±157 | 0.005  | 48  | 5156±130 | 0.094  |
|              |           | Trend |    |          | 0.001  |     |          | 0.218  |

|              |           |       |    |          |        |     |          |       |
|--------------|-----------|-------|----|----------|--------|-----|----------|-------|
| <i>ITGB2</i> | rs760462  | CC    | 53 | 6615±171 |        | 121 | 5355±117 |       |
|              |           | CT    | 43 | 6284±176 | 0.383  | 90  | 5544±135 | 0.319 |
|              |           | TT    | 7  | 7157±177 | 0.664  | 19  | 6195±190 | 0.220 |
|              |           | TT+CT | 50 | 6406±177 | 0.503  | 109 | 5658±147 | 0.188 |
|              |           | Trend |    |          | 0.768  |     |          | 0.140 |
| <i>ITGB2</i> | rs760458  | CC    | 59 | 6627±172 |        | 108 | 5644±148 |       |
|              |           | AC    | 39 | 6521±180 | 0.493  | 101 | 5392±122 | 0.436 |
|              |           | AA    | 5  | 5120±763 | <0.001 | 19  | 5353±859 | 0.143 |
|              |           | AA+AC | 44 | 6361±176 | 0.235  | 120 | 5386±116 | 0.310 |
|              |           | Trend |    |          | 0.046  |     |          | 0.196 |
| <i>ITGB2</i> | rs760456  | CC    | 26 | 6700±186 |        | 73  | 5400±115 |       |
|              |           | CG    | 50 | 6594±170 | 0.923  | 101 | 5355±123 | 0.783 |
|              |           | GG    | 27 | 6185±169 | 0.235  | 56  | 5886±162 | 0.274 |
|              |           | GG+CG | 77 | 6451±170 | 0.591  | 157 | 5545±140 | 0.740 |
|              |           | Trend |    |          | 0.234  |     |          | 0.316 |
| <i>ITGB2</i> | rs2838734 | TT    | 42 | 6524±187 |        | 76  | 5821±159 |       |
|              |           | CT    | 47 | 6481±160 | 0.950  | 107 | 5410±111 | 0.301 |
|              |           | CC    | 14 | 6593±190 | 0.784  | 47  | 5179±123 | 0.026 |
|              |           | CC+CT | 61 | 6507±165 | 0.881  | 154 | 5340±115 | 0.108 |
|              |           | Trend |    |          | 0.809  |     |          | 0.031 |
| <i>ITGB2</i> | rs3788150 | GG    | 42 | 6605±185 |        | 100 | 5361±126 |       |
|              |           | GT    | 50 | 6458±170 | 0.717  | 112 | 5521±126 | 0.158 |
|              |           | TT    | 10 | 6320±163 | 0.612  | 18  | 6128±187 | 0.187 |
|              |           | TT+GT | 60 | 6435±168 | 0.654  | 130 | 5605±137 | 0.099 |
|              |           | Trend |    |          | 0.596  |     |          | 0.081 |
| <i>ITGB2</i> | rs2838735 | TT    | 43 | 6516±185 |        | 77  | 5826±158 |       |
|              |           | CT    | 46 | 6487±161 | 0.910  | 106 | 5403±111 | 0.247 |
|              |           | CC    | 14 | 6593±190 | 0.770  | 47  | 5179±123 | 0.022 |
|              |           | CC+CT | 60 | 6512±167 | 0.842  | 153 | 5334±115 | 0.084 |
|              |           | Trend |    |          | 0.782  |     |          | 0.025 |
| <i>ITGB2</i> | rs2838737 | CC    | 49 | 6535±176 |        | 100 | 5361±126 |       |
|              |           | CT    | 43 | 6474±177 | 0.979  | 107 | 5521±128 | 0.150 |
|              |           | TT    | 11 | 6573±165 | 0.903  | 22  | 6005±175 | 0.225 |
|              |           | TT+CT | 54 | 6494±173 | 0.990  | 129 | 5603±137 | 0.099 |
|              |           | Trend |    |          | 0.946  |     |          | 0.098 |
| <i>ITGB2</i> | rs1474552 | TT    | 67 | 6519±185 |        | 146 | 5628±136 |       |
|              |           | CT    | 31 | 6674±154 | 0.427  | 77  | 5264±126 | 0.140 |
|              |           | CC    | 5  | 5440±844 | 0.061  | 7   | 5386±116 | 0.692 |
|              |           | CC+CT | 36 | 6503±152 | 0.802  | 84  | 5274±125 | 0.139 |
|              |           | Trend |    |          | 0.715  |     |          | 0.175 |
| <i>ITGB2</i> | rs3788151 | CC    | 94 | 6600±178 |        | 204 | 5547±136 |       |
|              |           | CT    | 8  | 5838±507 | 0.145  | 26  | 5119±926 | 0.137 |
|              |           | TT    | 1  | 3800     | <0.001 |     |          |       |
|              |           | TT+CT | 9  | 5611±828 | 0.060  | 26  | 5119±926 | 0.137 |
|              |           | Trend |    |          | 0.016  |     |          | 0.137 |
| <i>ITGB2</i> | rs2070946 | TT    | 79 | 6486±170 |        | 176 | 5469±126 |       |
|              |           | CT    | 23 | 6470±180 | 0.916  | 52  | 5600±157 | 0.742 |
|              |           | CC    | 1  | 9700     | <0.001 | 2   | 5450±71  | 0.102 |
|              |           | CC+CT | 24 | 6604±188 | 0.721  | 54  | 5594±154 | 0.701 |



|              |           |       |     |          |       |     |          |       |
|--------------|-----------|-------|-----|----------|-------|-----|----------|-------|
|              |           | Trend |     |          | 0.523 |     |          | 0.649 |
| <i>ITGB2</i> | rs2838739 | AA    | 27  | 6500±174 |       | 67  | 5357±123 |       |
|              |           | AG    | 53  | 6302±155 | 0.989 | 119 | 5485±127 | 0.186 |
|              |           | GG    | 23  | 7017±209 | 0.135 | 44  | 5752±158 | 0.065 |
|              |           | GG+AG | 76  | 6518±175 | 0.568 | 163 | 5557±136 | 0.092 |
|              |           | Trend |     |          | 0.152 |     |          | 0.059 |
| <i>INSL3</i> | rs2286662 | CC    | 44  | 6564±175 |       | 90  | 5651±141 |       |
|              |           | CT    | 49  | 6510±177 | 0.441 | 106 | 5397±134 | 0.930 |
|              |           | TT    | 10  | 6310±170 | 0.239 | 31  | 5468±106 | 0.376 |
|              |           | TT+CT | 59  | 6476±174 | 0.351 | 137 | 5413±128 | 0.859 |
|              |           | Trend |     |          | 0.252 |     |          | 0.534 |
| <i>INSL3</i> | rs2382987 | AA    | 73  | 6567±177 |       | 167 | 5483±137 |       |
|              |           | AG    | 26  | 6346±167 | 0.399 | 52  | 5613±131 | 0.187 |
|              |           | GG    | 3   | 7367±138 | 0.931 | 11  | 5200±587 | 0.991 |
|              |           | GG+AG | 29  | 6452±165 | 0.435 | 63  | 5541±122 | 0.222 |
|              |           | Trend |     |          | 0.490 |     |          | 0.307 |
| <i>JAK3</i>  | rs11888   | TT    | 21  | 6914±186 |       | 67  | 5554±138 |       |
|              |           | CT    | 57  | 6372±187 | 0.322 | 122 | 5620±138 | 0.959 |
|              |           | CC    | 25  | 6500±125 | 0.799 | 40  | 5068±976 | 0.007 |
|              |           | CC+CT | 82  | 6411±170 | 0.411 | 162 | 5483±131 | 0.447 |
|              |           | Trend |     |          | 0.849 |     |          | 0.025 |
| <i>JAK3</i>  | rs2072496 | GG    | 51  | 6725±181 |       | 121 | 5434±133 |       |
|              |           | AG    | 38  | 6153±164 | 0.208 | 96  | 5609±135 | 0.268 |
|              |           | AA    | 14  | 6721±167 | 0.777 | 12  | 5367±114 | 0.989 |
|              |           | AA+AG | 52  | 6306±165 | 0.364 | 108 | 5582±132 | 0.312 |
|              |           | Trend |     |          | 0.742 |     |          | 0.463 |
| <i>JAK3</i>  | rs3212752 | TT    | 95  | 6458±172 |       | 218 | 5482±131 |       |
|              |           | CT    | 8   | 7175±192 | 0.209 | 12  | 5800±169 | 0.631 |
| <i>JAK3</i>  | rs3212741 | GG    | 91  | 6503±179 |       | 210 | 5525±133 |       |
|              |           | AG    | 12  | 6592±135 | 0.744 | 20  | 5220±128 | 0.302 |
| <i>JAK3</i>  | rs867174  | AA    | 101 | 6503±175 |       | 227 | 5514±133 |       |
|              |           | AG    |     |          |       | 3   | 4333±839 | 0.110 |
|              |           | GG    | 1   | 6400     | 0.674 |     |          |       |
|              |           | GG+   | 1   | 6400     | 0.674 | 3   | 4333±839 | 0.110 |
|              |           | Trend |     |          | 0.674 |     |          | 0.110 |
| <i>JAK3</i>  | rs3212711 | GG    | 41  | 6571±184 |       | 102 | 5635±136 |       |
|              |           | AG    | 51  | 6343±164 | 0.560 | 109 | 5450±135 | 0.213 |
|              |           | AA    | 11  | 7091±179 | 0.578 | 19  | 5047±876 | 0.009 |
|              |           | AA+AG | 62  | 6476±168 | 0.710 | 128 | 5390±129 | 0.092 |
|              |           | Trend |     |          | 0.939 |     |          | 0.021 |
| <i>JAK3</i>  | rs3212701 | CC    | 31  | 6632±204 |       | 99  | 5605±132 |       |
|              |           | CT    | 54  | 6411±138 | 0.715 | 103 | 5507±142 | 0.349 |
|              |           | TT    | 18  | 6617±218 | 0.625 | 28  | 5093±853 | 0.022 |
|              |           | TT+CT | 72  | 6463±160 | 0.647 | 131 | 5418±133 | 0.152 |
|              |           | Trend |     |          | 0.612 |     |          | 0.039 |
| <i>JAK3</i>  | rs2110586 | CC    | 102 | 6509±174 |       | 227 | 5489±132 |       |
|              |           | CT    | 1   | 7000     | 0.570 | 3   | 6267±191 | 0.115 |
| <i>JAK3</i>  | rs7250423 | CC    | 59  | 6551±171 |       | 147 | 5539±133 |       |
|              |           | CT    | 40  | 6260±169 | 0.200 | 77  | 5484±136 | 0.884 |

|              |            |       |     |          |        |     |          |       |
|--------------|------------|-------|-----|----------|--------|-----|----------|-------|
|              |            | TT    | 4   | 8500±170 | 0.067  | 6   | 4700±415 | 0.001 |
|              |            | TT+CT | 44  | 6464±179 | 0.386  | 83  | 5428±133 | 0.666 |
|              |            | Trend |     |          | 0.814  |     |          | 0.422 |
| <i>JAK3</i>  | rs7245564  | TT    | 93  | 6540±179 |        | 212 | 5523±133 |       |
|              |            | GT    | 8   | 5900±103 | 0.164  | 18  | 5217±129 | 0.496 |
|              |            | GG    | 2   | 7750±636 | <0.001 |     |          |       |
|              |            | GG+GT | 10  | 6270±121 | 0.856  | 18  | 5217±129 | 0.496 |
|              |            | Trend |     |          | 0.579  |     |          | 0.496 |
| <i>JAK3</i>  | rs10402563 | CC    | 100 | 6542±174 |        | 219 | 5536±134 |       |
|              |            | AC    | 1   | 6400     | 0.655  | 6   | 4817±768 | 0.063 |
| <i>KLK1</i>  | rs197589   | GG    | 64  | 6325±169 |        | 125 | 5476±138 |       |
|              |            | CG    | 37  | 6911±180 | 0.077  | 92  | 5528±131 | 0.876 |
|              |            | CC    | 2   | 5200±424 | 0.253  | 12  | 5608±922 | 0.643 |
|              |            | CC+CG | 39  | 6823±179 | 0.096  | 104 | 5538±127 | 0.817 |
|              |            | Trend |     |          | 0.173  |     |          | 0.738 |
| <i>KLK1</i>  | rs3212846  | TT    | 36  | 6283±157 |        | 69  | 5499±133 |       |
|              |            | CT    | 48  | 6448±171 | 0.336  | 113 | 5501±132 | 0.774 |
|              |            | CC    | 19  | 7116±203 | 0.114  | 47  | 5519±136 | 0.475 |
|              |            | CC+CT | 67  | 6637±182 | 0.175  | 160 | 5506±133 | 0.621 |
|              |            | Trend |     |          | 0.107  |     |          | 0.484 |
| <i>KLK1</i>  | rs5519     | CC    | 36  | 6283±157 |        | 72  | 5489±133 |       |
|              |            | CT    | 48  | 6448±171 | 0.336  | 112 | 5498±131 | 0.756 |
|              |            | TT    | 19  | 7116±203 | 0.114  | 45  | 5542±139 | 0.571 |
|              |            | TT+CT | 67  | 6637±182 | 0.175  | 157 | 5511±133 | 0.648 |
|              |            | Trend |     |          | 0.107  |     |          | 0.570 |
| <i>KLK1</i>  | rs2659058  | TT    | 65  | 6348±168 |        | 131 | 5477±136 |       |
|              |            | CT    | 36  | 6886±182 | 0.109  | 88  | 5518±132 | 0.992 |
|              |            | CC    | 2   | 5200±424 | 0.227  | 10  | 5730±102 | 0.272 |
|              |            | CC+CT | 38  | 6797±181 | 0.134  | 98  | 5540±129 | 0.866 |
|              |            | Trend |     |          | 0.226  |     |          | 0.666 |
| <i>KLK1</i>  | rs2740502  | GG    | 64  | 6458±154 |        | 151 | 5536±129 |       |
|              |            | CG    | 31  | 6306±203 | 0.775  | 66  | 5348±134 | 0.124 |
|              |            | CC    | 8   | 7763±173 | 0.134  | 12  | 5950±164 | 0.764 |
|              |            | CC+CG | 39  | 6605±204 | 0.796  | 78  | 5441±139 | 0.212 |
|              |            | Trend |     |          | 0.447  |     |          | 0.458 |
| <i>KLK1</i>  | rs3212855  | TT    | 81  | 6519±174 |        | 188 | 5507±131 |       |
|              |            | GT    | 21  | 6514±180 | 0.894  | 37  | 5346±132 | 0.270 |
|              |            | GG    | 1   | 6100     | 0.943  | 5   | 6300±184 | 0.321 |
|              |            | GG+GT | 22  | 6495±176 | 0.891  | 42  | 5460±140 | 0.540 |
|              |            | Trend |     |          | 0.888  |     |          | 0.898 |
| <i>KLK15</i> | rs2560935  | CC    | 92  | 6530±178 |        | 186 | 5447±130 |       |
|              |            | CT    | 10  | 6410±147 | 0.949  | 43  | 5751±145 | 0.095 |
|              |            | TT    | 1   | 6000     | 0.360  |     |          |       |
|              |            | TT+CT | 11  | 6373±140 | 0.965  | 43  | 5751±145 | 0.095 |
|              |            | Trend |     |          | 0.895  |     |          | 0.095 |
| <i>KLK15</i> | rs3745523  | CC    | 53  | 6589±162 |        | 100 | 5358±124 |       |
|              |            | CT    | 37  | 6378±200 | 0.509  | 108 | 5612±145 | 0.304 |
|              |            | TT    | 13  | 6592±150 | 0.514  | 22  | 5582±105 | 0.303 |
|              |            | TT+CT | 50  | 6434±187 | 0.758  | 130 | 5607±138 | 0.234 |

|              |           |       |    |          |       |     |          |       |
|--------------|-----------|-------|----|----------|-------|-----|----------|-------|
|              |           | Trend |    |          | 0.860 |     |          | 0.209 |
| <i>KLK15</i> | rs2659056 | TT    | 42 | 6514±166 |       | 85  | 5575±135 |       |
|              |           | CT    | 42 | 6410±200 | 0.930 | 107 | 5565±133 | 0.781 |
|              |           | CC    | 19 | 6742±129 | 0.694 | 38  | 5139±124 | 0.101 |
|              |           | CC+CT | 61 | 6513±180 | 0.940 | 145 | 5454±132 | 0.727 |
|              |           | Trend |    |          | 0.781 |     |          | 0.209 |
| <i>KLK15</i> | rs266850  | AA    | 84 | 6415±174 |       | 187 | 5442±129 |       |
|              |           | AG    | 18 | 7000±171 | 0.207 | 42  | 5781±148 | 0.140 |
|              |           | GG    | 1  | 6000     | 0.442 |     |          |       |
|              |           | GG+AG | 19 | 6947±168 | 0.182 | 42  | 5781±148 | 0.140 |
|              |           | Trend |    |          | 0.170 |     |          | 0.140 |
| <i>KLK15</i> | rs266851  | CC    | 88 | 6430±169 |       | 184 | 5501±137 |       |
|              |           | CT    | 13 | 7200±192 | 0.096 | 43  | 5544±117 | 0.543 |
|              |           | TT    | 2  | 5750±275 | 0.340 | 2   | 4900±566 | 0.055 |
|              |           | TT+CT | 15 | 7007±199 | 0.357 | 45  | 5516±115 | 0.669 |
|              |           | Trend |    |          | 0.754 |     |          | 0.835 |
| <i>KLK2</i>  | rs2739476 | GG    | 56 | 6711±177 |       | 144 | 5331±123 |       |
|              |           | AG    | 39 | 6464±175 | 0.459 | 78  | 5819±142 | 0.012 |
|              |           | AA    | 8  | 5375±902 | 0.007 | 8   | 5388±167 | 0.636 |
|              |           | AA+AG | 47 | 6279±168 | 0.213 | 86  | 5779±144 | 0.015 |
|              |           | Trend |    |          | 0.054 |     |          | 0.043 |
| <i>KLK2</i>  | rs3760728 | CC    | 41 | 6302±147 |       | 76  | 5576±145 |       |
|              |           | CG    | 48 | 6700±194 | 0.405 | 108 | 5523±131 | 0.787 |
|              |           | GG    | 14 | 6493±178 | 0.747 | 46  | 5313±116 | 0.084 |
|              |           | GG+CG | 62 | 6653±189 | 0.534 | 154 | 5460±127 | 0.442 |
|              |           | Trend |    |          | 0.875 |     |          | 0.131 |
| <i>KLK2</i>  | rs198977  | CC    | 55 | 6687±188 |       | 147 | 5463±133 |       |
|              |           | CT    | 45 | 6322±161 | 0.689 | 68  | 5576±127 | 0.475 |
|              |           | TT    | 3  | 6200±100 | 0.624 | 14  | 5193±114 | 0.184 |
|              |           | TT+CT | 48 | 6315±156 | 0.669 | 82  | 5511±125 | 0.900 |
|              |           | Trend |    |          | 0.639 |     |          | 0.612 |
| <i>KLK4</i>  | rs806019  | CC    | 63 | 6738±177 |       | 148 | 5432±133 |       |
|              |           | CG    | 37 | 6149±170 | 0.233 | 69  | 5581±126 | 0.963 |
|              |           | GG    | 3  | 6300±100 | 0.755 | 13  | 5823±167 | 0.895 |
|              |           | GG+CG | 40 | 6160±164 | 0.239 | 82  | 5620±133 | 0.990 |
|              |           | Trend |    |          | 0.262 |     |          | 0.940 |
| <i>KLK4</i>  | rs1654553 | TT    | 73 | 6551±173 |       | 180 | 5399±122 |       |
|              |           | CT    | 23 | 6200±164 | 0.342 | 46  | 5798±153 | 0.030 |
|              |           | CC    | 2  | 7300±466 | 0.658 | 2   | 6050±247 | 0.727 |
|              |           | CC+CT | 25 | 6288±186 | 0.475 | 48  | 5808±154 | 0.030 |
|              |           | Trend |    |          | 0.704 |     |          | 0.045 |
| <i>KLK4</i>  | rs2979451 | TT    | 69 | 6587±181 |       | 166 | 5467±131 |       |
|              |           | CT    | 31 | 6371±168 | 0.809 | 56  | 5568±130 | 0.943 |
|              |           | CC    | 3  | 6300±100 | 0.946 | 8   | 5663±197 | 0.853 |
|              |           | CC+CT | 34 | 6365±160 | 0.820 | 64  | 5580±138 | 0.888 |
|              |           | Trend |    |          | 0.840 |     |          | 0.855 |
| <i>KLK4</i>  | rs198968  | AA    | 53 | 6638±178 |       | 109 | 5389±127 |       |
|              |           | AG    | 42 | 6445±178 | 0.631 | 95  | 5565±132 | 0.391 |
|              |           | GG    | 8  | 6050±113 | 0.397 | 26  | 5715±157 | 0.596 |

|             |            |       |    |          |       |     |          |       |
|-------------|------------|-------|----|----------|-------|-----|----------|-------|
|             |            | GG+AG | 50 | 6382±169 | 0.543 | 121 | 5598±137 | 0.364 |
|             |            | Trend |    |          | 0.439 |     |          | 0.426 |
| <i>KLK4</i> | rs2664152  | TT    | 78 | 6592±170 |       | 152 | 5400±115 |       |
|             |            | GT    | 21 | 6371±197 | 0.612 | 68  | 5746±164 | 0.080 |
|             |            | GG    | 4  | 5725±120 | 0.702 | 9   | 5433±135 | 0.678 |
|             |            | GG+GT | 25 | 6268±186 | 0.572 | 77  | 5709±161 | 0.084 |
|             |            | Trend |    |          | 0.547 |     |          | 0.126 |
| <i>KLK4</i> | rs2664153  | GG    | 65 | 6632±180 |       | 112 | 5409±129 |       |
|             |            | AG    | 31 | 6371±180 | 0.477 | 100 | 5542±131 | 0.473 |
|             |            | AA    | 7  | 6043±408 | 0.342 | 18  | 5817±163 | 0.440 |
|             |            | AA+AG | 38 | 6311±163 | 0.416 | 118 | 5584±136 | 0.386 |
|             |            | Trend |    |          | 0.348 |     |          | 0.344 |
| <i>KLK4</i> | rs1701930  | AA    | 90 | 6463±174 |       | 179 | 5473±131 |       |
|             |            | AG    | 13 | 6862±173 | 0.145 | 51  | 5590±139 | 0.265 |
| <i>KLK4</i> | rs2659079  | GG    | 90 | 6463±174 |       | 179 | 5473±131 |       |
|             |            | AG    | 13 | 6862±173 | 0.145 | 51  | 5590±139 | 0.265 |
| <i>KLK4</i> | rs10420003 | CC    | 85 | 6652±176 |       | 192 | 5495±136 |       |
|             |            | CT    | 15 | 5820±163 | 0.090 | 36  | 5536±116 | 0.998 |
|             |            | TT    | 2  | 6350±71  | 0.539 | 2   | 5200±566 | 0.934 |
|             |            | TT+CT | 17 | 5882±154 | 0.086 | 38  | 5518±113 | 0.990 |
|             |            | Trend |    |          | 0.103 |     |          | 0.977 |
| <i>KLK4</i> | rs268922   | CC    | 96 | 6492±174 |       | 183 | 5480±132 |       |
|             |            | AC    | 7  | 6814±175 | 0.576 | 47  | 5572±135 | 0.285 |
| <i>KLK4</i> | rs10427094 | CC    | 82 | 6650±179 |       | 188 | 5520±136 |       |
|             |            | CT    | 19 | 5942±149 | 0.094 | 39  | 5441±117 | 0.640 |
|             |            | TT    | 2  | 6350±71  | 0.533 | 2   | 5200±566 | 0.941 |
|             |            | TT+CT | 21 | 5981±142 | 0.090 | 41  | 5429±115 | 0.657 |
|             |            | Trend |    |          | 0.103 |     |          | 0.688 |
| <i>KLK4</i> | rs8100631  | TT    | 75 | 6632±180 |       | 150 | 5515±138 |       |
|             |            | CT    | 22 | 6086±162 | 0.125 | 69  | 5429±123 | 0.695 |
|             |            | CC    | 6  | 6600±113 | 0.685 | 11  | 5709±131 | 0.361 |
|             |            | CC+CT | 28 | 6196±152 | 0.214 | 80  | 5468±124 | 0.994 |
|             |            | Trend |    |          | 0.425 |     |          | 0.702 |
| <i>KLK6</i> | rs4592765  | CC    | 57 | 6646±181 |       | 131 | 5572±144 |       |
|             |            | CT    | 38 | 6292±170 | 0.543 | 82  | 5449±119 | 0.966 |
|             |            | TT    | 8  | 6625±138 | 0.618 | 17  | 5176±106 | 0.079 |
|             |            | TT+CT | 46 | 6350±164 | 0.674 | 99  | 5402±116 | 0.585 |
|             |            | Trend |    |          | 0.909 |     |          | 0.274 |
| <i>KLK6</i> | rs1654537  | AA    | 41 | 6707±209 |       | 122 | 5523±137 |       |
|             |            | AG    | 38 | 6342±149 | 0.731 | 94  | 5488±124 | 0.955 |
|             |            | GG    | 24 | 6454±143 | 0.463 | 12  | 4958±105 | 0.226 |
|             |            | GG+AG | 62 | 6385±146 | 0.579 | 106 | 5428±123 | 0.735 |
|             |            | Trend |    |          | 0.481 |     |          | 0.480 |
| <i>KLK7</i> | rs1701958  | CC    | 98 | 6562±176 |       | 212 | 5464±129 |       |
|             |            | CG    | 5  | 5560±904 | 0.183 | 18  | 5906±173 | 0.691 |
| <i>KLK7</i> | rs1618440  | TT    | 25 | 6476±181 |       | 77  | 5462±133 |       |
|             |            | CT    | 51 | 6780±167 | 0.668 | 106 | 5619±140 | 0.898 |
|             |            | CC    | 27 | 6044±176 | 0.245 | 47  | 5287±113 | 0.851 |
|             |            | CC+CT | 78 | 6526±172 | 0.833 | 153 | 5517±133 | 0.983 |

|              |           |       |    |          |        |       |          |        |
|--------------|-----------|-------|----|----------|--------|-------|----------|--------|
|              |           | Trend |    |          | 0.244  |       |          | 0.894  |
| <i>KLKB1</i> | rs4253236 | CC    | 55 | 6605±172 |        | 108   | 5550±140 |        |
|              |           | CT    | 33 | 6218±143 | 0.199  | 96    | 5493±127 | 0.799  |
|              |           | TT    | 15 | 6827±235 | 0.759  | 26    | 5308±126 | 0.618  |
|              |           | TT+CT | 48 | 6408±176 | 0.286  | 122   | 5453±127 | 0.697  |
|              |           | Trend |    |          |        | 0.499 |          | 0.623  |
| <i>KLKB1</i> | rs4253246 | AA    | 93 | 6568±168 |        | 213   | 5462±129 |        |
|              |           | AT    | 9  | 6144±234 | 0.336  | 17    | 5953±167 | 0.702  |
|              |           | TT    | 1  | 4800     | <0.001 |       |          |        |
|              |           | TT+AT | 10 | 6010±225 | 0.238  | 17    | 5953±167 | 0.702  |
|              |           | Trend |    |          |        | 0.152 |          | 0.702  |
| <i>KLKB1</i> | rs2304595 | GG    | 47 | 6389±195 |        | 116   | 5678±140 |        |
|              |           | AG    | 44 | 6680±159 | 0.107  | 86    | 5301±122 | 0.077  |
|              |           | AA    | 12 | 6392±145 | 0.595  | 28    | 5361±128 | 0.279  |
|              |           | AA+AG | 56 | 6618±155 | 0.131  | 114   | 5316±123 | 0.063  |
|              |           | Trend |    |          |        | 0.247 |          | 0.120  |
| <i>KLKB1</i> | rs4253302 | AA    | 57 | 6572±174 |        | 135   | 5632±146 |        |
|              |           | AG    | 27 | 6237±140 | 0.507  | 81    | 5360±110 | 0.139  |
|              |           | GG    | 19 | 6732±217 | 0.698  | 13    | 4954±109 | 0.026  |
|              |           | GG+AG | 46 | 6441±175 | 0.517  | 94    | 5304±110 | 0.056  |
|              |           | Trend |    |          |        | 0.603 |          | 0.024  |
| <i>KLKB1</i> | rs4253311 | GG    | 48 | 6635±161 |        | 95    | 5517±138 |        |
|              |           | AG    | 36 | 6386±163 | 0.304  | 104   | 5482±125 | 0.535  |
|              |           | AA    | 19 | 6447±225 | 0.180  | 31    | 5500±143 | 0.993  |
|              |           | AA+AG | 55 | 6407±185 | 0.132  | 135   | 5486±129 | 0.627  |
|              |           | Trend |    |          |        | 0.135 |          | 0.818  |
| <i>KLKB1</i> | rs4253315 | CC    | 48 | 6383±178 |        | 107   | 5341±127 |        |
|              |           | CT    | 46 | 6726±171 | 0.400  | 94    | 5577±130 | 0.297  |
|              |           | TT    | 9  | 6122±171 | 0.937  | 29    | 5828±157 | 0.068  |
|              |           | TT+CT | 55 | 6627±171 | 0.439  | 123   | 5636±137 | 0.126  |
|              |           | Trend |    |          |        | 0.575 |          | 0.062  |
| <i>KLKB1</i> | rs3775302 | AA    | 46 | 6402±181 |        | 103   | 5308±124 |        |
|              |           | AG    | 47 | 6679±170 | 0.418  | 97    | 5590±133 | 0.285  |
|              |           | GG    | 10 | 6250±166 | 0.817  | 30    | 5860±155 | 0.039  |
|              |           | GG+AG | 57 | 6604±169 | 0.440  | 127   | 5654±138 | 0.099  |
|              |           | Trend |    |          |        | 0.544 |          | 0.038  |
| <i>KLKB1</i> | rs925453  | CC    | 78 | 6622±167 |        | 177   | 5427±127 |        |
|              |           | CT    | 24 | 6233±193 | 0.081  | 47    | 5572±134 | 0.533  |
|              |           | TT    | 1  | 4800     | <0.001 | 6     | 7033±205 | 0.015  |
|              |           | TT+CT | 25 | 6176±191 | 0.057  | 53    | 5738±148 | 0.171  |
|              |           | Trend |    |          |        | 0.033 |          | 0.057  |
| <i>KLKB1</i> | rs3087505 | GG    | 88 | 6552±174 |        | 198   | 5447±127 |        |
|              |           | AG    | 15 | 6287±173 | 0.200  | 30    | 5653±154 | 0.310  |
|              |           | AA    |    |          |        | 2     | 8300±141 | <0.001 |
|              |           | AA+AG | 15 | 6287±173 | 0.200  | 32    | 5819±162 | 0.120  |
|              |           | Trend |    |          |        | 0.200 |          | 0.041  |
| <i>KLKB1</i> | rs3822055 | CC    | 88 | 6552±174 |        | 192   | 5455±128 |        |
|              |           | CT    | 15 | 6287±173 | 0.200  | 35    | 5577±146 | 0.301  |
|              |           | TT    |    |          |        | 3     | 7367±162 | 0.009  |

|              |            |       |     |          |        |     |          |        |
|--------------|------------|-------|-----|----------|--------|-----|----------|--------|
|              |            | TT+CT | 15  | 6287±173 | 0.200  | 38  | 5718±153 | 0.118  |
|              |            | Trend |     |          | 0.200  |     |          | 0.045  |
| <i>KLKB1</i> | rs6844764  | CC    | 35  | 6300±197 |        | 83  | 5633±140 |        |
|              |            | CG    | 55  | 6744±165 | 0.106  | 105 | 5430±126 | 0.580  |
|              |            | GG    | 13  | 6115±136 | 0.943  | 40  | 5420±137 | 0.671  |
|              |            | GG+CG | 68  | 6624±161 | 0.174  | 145 | 5428±129 | 0.553  |
|              |            | Trend |     |          | 0.507  |     |          | 0.618  |
| <i>KLKB1</i> | rs13135645 | TT    | 70  | 6604±181 |        | 179 | 5511±136 |        |
|              |            | CT    | 28  | 6332±154 | 0.596  | 50  | 5400±117 | 0.441  |
|              |            | CC    | 5   | 6260±198 | 0.626  | 1   | 8300     | <0.001 |
|              |            | CC+CT | 33  | 6321±158 | 0.514  | 51  | 5457±123 | 0.700  |
|              |            | Trend |     |          | 0.496  |     |          | 0.948  |
| <i>KLKB1</i> | rs11132383 | CC    | 35  | 6300±197 |        | 84  | 5665±142 |        |
|              |            | CT    | 56  | 6705±166 | 0.126  | 106 | 5396±122 | 0.371  |
|              |            | TT    | 12  | 6242±133 | 0.788  | 40  | 5420±137 | 0.565  |
|              |            | TT+CT | 68  | 6624±161 | 0.174  | 146 | 5403±126 | 0.360  |
|              |            | Trend |     |          | 0.404  |     |          | 0.477  |
| <i>LMAN1</i> | rs2298711  | TT    | 79  | 6471±178 |        | 183 | 5470±124 |        |
|              |            | AT    | 23  | 6604±164 | 0.579  | 47  | 5611±162 | 0.997  |
|              |            | AA    | 1   | 7800     | <0.001 |     |          |        |
|              |            | AA+AT | 24  | 6654±162 | 0.479  | 47  | 5611±162 | 0.997  |
|              |            | Trend |     |          | 0.370  |     |          | 0.997  |
| <i>LMAN1</i> | rs4940866  | AA    | 27  | 6470±157 |        | 69  | 5145±109 |        |
|              |            | AG    | 58  | 6528±186 | 0.748  | 110 | 5590±140 | 0.031  |
|              |            | GG    | 18  | 6533±166 | 0.716  | 50  | 5810±136 | 0.014  |
|              |            | GG+AG | 76  | 6529±180 | 0.696  | 160 | 5659±139 | 0.008  |
|              |            | Trend |     |          | 0.698  |     |          | 0.009  |
| <i>LMAN1</i> | rs12953981 | TT    | 31  | 6794±166 |        | 77  | 5661±130 |        |
|              |            | CT    | 56  | 6459±189 | 0.322  | 107 | 5560±144 | 0.548  |
|              |            | CC    | 16  | 6163±125 | 0.086  | 46  | 5085±101 | 0.016  |
|              |            | CC+CT | 72  | 6393±177 | 0.210  | 153 | 5417±134 | 0.187  |
|              |            | Trend |     |          | 0.098  |     |          | 0.027  |
| <i>LMAN1</i> | rs1127220  | TT    | 90  | 6494±169 |        | 221 | 5516±134 |        |
|              |            | CT    | 8   | 7213±183 | 0.705  | 8   | 4988±882 | 0.068  |
|              |            | CC    | 4   | 6025±262 | 0.527  |     |          |        |
|              |            | CC+CT | 12  | 6817±208 | 0.819  | 8   | 4988±882 | 0.068  |
|              |            | Trend |     |          | 0.661  |     |          | 0.068  |
| <i>LMAN1</i> | rs2282582  | TT    | 98  | 6552±171 |        | 222 | 5517±134 |        |
|              |            | AT    | 5   | 5760±234 | 0.345  | 8   | 4988±882 | 0.068  |
| <i>LMAN1</i> | rs2282583  | CC    | 102 | 6531±174 |        | 222 | 5517±134 |        |
|              |            | CT    | 1   | 4700     | 0.001  | 8   | 4988±882 | 0.068  |
| <i>LMAN1</i> | rs1899894  | CC    | 32  | 6847±166 |        | 77  | 5661±130 |        |
|              |            | CT    | 58  | 6371±186 | 0.161  | 107 | 5563±144 | 0.575  |
|              |            | TT    | 13  | 6331±128 | 0.155  | 45  | 5062±101 | 0.012  |
|              |            | TT+CT | 71  | 6363±176 | 0.127  | 152 | 5414±134 | 0.187  |
|              |            | Trend |     |          | 0.105  |     |          | 0.022  |
| <i>LMAN1</i> | rs11876937 | AA    | 87  | 6402±167 |        | 199 | 5418±128 |        |
|              |            | AG    | 10  | 7080±240 | 0.759  | 28  | 5968±139 | 0.186  |
|              |            | GG    | 6   | 7183±122 | 0.076  | 1   | 4000     | <0.001 |

|        |            |       |     |          |       |     |          |       |
|--------|------------|-------|-----|----------|-------|-----|----------|-------|
|        |            | GG+AG | 16  | 7119±199 | 0.348 | 29  | 5900±141 | 0.254 |
|        |            | Trend |     |          | 0.159 |     |          | 0.361 |
| SCNN1A | rs3759324  | CC    | 43  | 6491±174 |       | 80  | 5490±144 |       |
|        |            | CT    | 45  | 6638±178 | 0.653 | 131 | 5516±127 | 0.721 |
|        |            | TT    | 15  | 6207±167 | 0.492 | 18  | 5394±130 | 0.728 |
|        |            | TT+CT | 60  | 6530±175 | 0.905 | 149 | 5501±127 | 0.692 |
|        |            | Trend |     |          | 0.723 |     |          | 0.669 |
| LTBR   | rs3759333  | CC    | 34  | 7018±152 |       | 79  | 5513±117 |       |
|        |            | CT    | 47  | 6187±170 | 0.007 | 110 | 5429±138 | 0.849 |
|        |            | TT    | 22  | 6432±199 | 0.092 | 41  | 5659±148 | 0.488 |
|        |            | TT+CT | 69  | 6265±179 | 0.005 | 151 | 5491±140 | 0.887 |
|        |            | Trend |     |          | 0.042 |     |          | 0.565 |
| LTBR   | rs4301834  | AA    | 74  | 6355±180 |       | 156 | 5678±142 |       |
|        |            | AG    | 20  | 6775±164 | 0.186 | 68  | 5094±102 | 0.003 |
|        |            | GG    | 9   | 7233±125 | 0.101 | 6   | 5417±886 | 0.277 |
|        |            | GG+AG | 29  | 6917±152 | 0.073 | 74  | 5120±101 | 0.002 |
|        |            | Trend |     |          | 0.052 |     |          | 0.004 |
| LTBR   | rs11064160 | CC    | 64  | 6206±166 |       | 134 | 5666±144 |       |
|        |            | CT    | 36  | 7128±169 | 0.005 | 82  | 5246±109 | 0.006 |
|        |            | TT    | 3   | 5700±250 | 0.562 | 14  | 5371±123 | 0.281 |
|        |            | TT+CT | 39  | 7018±176 | 0.015 | 96  | 5265±111 | 0.006 |
|        |            | Trend |     |          | 0.124 |     |          | 0.017 |
| LTBR   | rs12296430 | GG    | 97  | 6452±170 |       | 207 | 5525±132 |       |
|        |            | CG    | 6   | 7517±220 | 0.230 | 23  | 5265±139 | 0.397 |
| BAT5   | rs2295663  | AA    | 74  | 6619±185 |       | 165 | 5490±124 |       |
|        |            | AG    | 26  | 6312±137 | 0.345 | 62  | 5568±154 | 0.949 |
|        |            | GG    | 2   | 5050±219 | 0.256 | 3   | 4567±124 | 0.054 |
|        |            | GG+AG | 28  | 6221±142 | 0.219 | 65  | 5522±154 | 0.908 |
|        |            | Trend |     |          | 0.176 |     |          | 0.685 |
| BAT5   | rs1266071  | CC    | 102 | 6529±174 |       | 218 | 5471±130 |       |
|        |            | CT    | 1   | 4900     | 0.022 | 12  | 6000±169 | 0.728 |
| LY6G6D | rs805287   | AA    | 33  | 6494±198 |       | 67  | 5607±139 |       |
|        |            | AG    | 52  | 6537±172 | 0.309 | 117 | 5589±140 | 0.698 |
|        |            | GG    | 18  | 6483±135 | 0.722 | 46  | 5111±941 | 0.072 |
|        |            | GG+AG | 70  | 6523±163 | 0.364 | 163 | 5454±130 | 0.378 |
|        |            | Trend |     |          | 0.577 |     |          | 0.100 |
| LY96   | rs1905045  | TT    | 66  | 6461±176 |       | 114 | 5558±144 |       |
|        |            | CT    | 31  | 6510±169 | 0.778 | 100 | 5315±115 | 0.151 |
|        |            | CC    | 6   | 7117±186 | 0.166 | 16  | 6225±133 | 0.008 |
|        |            | CC+CT | 37  | 6608±171 | 0.495 | 116 | 5441±121 | 0.588 |
|        |            | Trend |     |          | 0.301 |     |          | 0.459 |
| LY96   | rs16938755 | TT    | 73  | 6425±174 |       | 188 | 5511±127 |       |
|        |            | CT    | 30  | 6730±173 | 0.209 | 40  | 5485±160 | 0.747 |
|        |            | CC    |     |          |       | 2   | 4600±0   | 0.803 |
|        |            | CC+CT | 30  | 6730±173 | 0.209 | 42  | 5443±157 | 0.756 |
|        |            | Trend |     |          | 0.209 |     |          | 0.767 |
| LY96   | rs11786591 | CC    | 56  | 6686±177 |       | 141 | 5500±126 |       |
|        |            | CT    | 39  | 6213±164 | 0.097 | 82  | 5501±144 | 0.405 |
|        |            | TT    | 8   | 6775±195 | 0.930 | 6   | 5633±149 | 0.976 |

|              |            |       |    |          |       |     |          |       |
|--------------|------------|-------|----|----------|-------|-----|----------|-------|
|              |            | TT+CT | 47 | 6309±169 | 0.162 | 88  | 5510±143 | 0.426 |
|              |            | Trend |    |          | 0.415 |     |          | 0.503 |
| <i>LY96</i>  | rs1991262  | GG    | 69 | 6246±159 |       | 183 | 5479±124 |       |
|              |            | CG    | 32 | 7013±191 | 0.054 | 40  | 5590±165 | 0.950 |
|              |            | CC    | 2  | 7750±275 | 0.228 | 7   | 5486±159 | 0.391 |
|              |            | CC+CG | 34 | 7056±192 | 0.036 | 47  | 5574±163 | 0.782 |
|              |            | Trend |    |          | 0.027 |     |          | 0.633 |
| <i>LY96</i>  | rs10504554 | TT    | 71 | 6286±177 |       | 192 | 5528±127 |       |
|              |            | CT    | 23 | 6974±170 | 0.105 | 38  | 5353±160 | 0.498 |
|              |            | CC    | 8  | 7163±138 | 0.026 |     |          |       |
|              |            | CC+CT | 31 | 7023±160 | 0.033 | 38  | 5353±160 | 0.498 |
|              |            | Trend |    |          | 0.015 |     |          | 0.498 |
| <i>LY96</i>  | rs7838017  | CC    | 68 | 6299±173 |       | 181 | 5456±123 |       |
|              |            | CT    | 33 | 6918±171 | 0.081 | 46  | 5578±162 | 0.807 |
|              |            | TT    | 2  | 7150±190 | 0.286 | 3   | 6833±165 | 0.032 |
|              |            | TT+CT | 35 | 6931±169 | 0.062 | 49  | 5655±163 | 0.591 |
|              |            | Trend |    |          | 0.048 |     |          | 0.394 |
| <i>MAL</i>   | rs6747563  | GG    | 45 | 6567±174 |       | 115 | 5329±139 |       |
|              |            | AG    | 48 | 6431±185 | 0.395 | 100 | 5691±126 | 0.050 |
|              |            | AA    | 10 | 6670±116 | 0.996 | 15  | 5520±121 | 0.371 |
|              |            | AA+AG | 58 | 6472±175 | 0.451 | 115 | 5669±125 | 0.047 |
|              |            | Trend |    |          | 0.615 |     |          | 0.082 |
| <i>MAL</i>   | rs2279785  | GG    | 70 | 6449±169 |       | 140 | 5606±133 |       |
|              |            | CG    | 33 | 6652±185 | 0.693 | 82  | 5399±134 | 0.602 |
|              |            | CC    |    |          |       | 6   | 4500±693 | 0.051 |
|              |            | CC+CG | 33 | 6652±185 | 0.693 | 88  | 5338±132 | 0.428 |
|              |            | Trend |    |          | 0.693 |     |          | 0.233 |
| <i>MAL</i>   | rs7560571  | AA    | 35 | 6131±175 |       | 71  | 5718±143 |       |
|              |            | AG    | 49 | 6620±175 | 0.126 | 110 | 5408±118 | 0.643 |
|              |            | GG    | 19 | 6942±160 | 0.044 | 49  | 5384±147 | 0.374 |
|              |            | GG+AG | 68 | 6710±171 | 0.051 | 159 | 5401±127 | 0.483 |
|              |            | Trend |    |          | 0.036 |     |          | 0.377 |
| <i>MAL</i>   | rs1316873  | CC    | 51 | 6865±151 |       | 123 | 5551±130 |       |
|              |            | CG    | 48 | 6200±195 | 0.031 | 90  | 5397±125 | 0.228 |
|              |            | GG    | 4  | 5800±876 | 0.085 | 17  | 5659±188 | 0.628 |
|              |            | GG+CG | 52 | 6169±189 | 0.022 | 107 | 5438±136 | 0.226 |
|              |            | Trend |    |          | 0.014 |     |          | 0.310 |
| <i>MAL</i>   | rs3113002  | AA    | 43 | 6156±166 |       | 88  | 5676±142 |       |
|              |            | AG    | 51 | 6851±177 | 0.018 | 102 | 5391±122 | 0.780 |
|              |            | GG    | 9  | 6311±168 | 0.706 | 40  | 5383±137 | 0.336 |
|              |            | GG+AG | 60 | 6770±175 | 0.032 | 142 | 5389±126 | 0.550 |
|              |            | Trend |    |          | 0.147 |     |          | 0.373 |
| <i>MAL</i>   | rs3112982  | CC    | 43 | 6156±166 |       | 87  | 5686±142 |       |
|              |            | CT    | 51 | 6851±177 | 0.018 | 105 | 5373±121 | 0.655 |
|              |            | TT    | 9  | 6311±168 | 0.706 | 38  | 5416±140 | 0.433 |
|              |            | TT+CT | 60 | 6770±175 | 0.032 | 143 | 5385±125 | 0.518 |
|              |            | Trend |    |          | 0.147 |     |          | 0.434 |
| <i>MASP1</i> | rs1848450  | TT    | 83 | 6560±179 |       | 184 | 5545±133 |       |
|              |            | CT    | 15 | 6067±152 | 0.242 | 46  | 5315±132 | 0.269 |



|              |            |       |     |          |       |     |          |       |
|--------------|------------|-------|-----|----------|-------|-----|----------|-------|
|              |            | CC    | 4   | 6775±125 | 0.367 |     |          |       |
|              |            | CC+CT | 19  | 6216±146 | 0.501 | 46  | 5315±132 | 0.269 |
|              |            | Trend |     |          | 0.829 |     |          | 0.269 |
| <i>MASP1</i> | rs720511   | GG    | 51  | 6659±160 |       | 94  | 5423±121 |       |
|              |            | AG    | 39  | 6613±194 | 0.941 | 107 | 5452±142 | 0.770 |
|              |            | AA    | 12  | 5825±138 | 0.108 | 28  | 5779±112 | 0.107 |
|              |            | AA+AG | 51  | 6427±184 | 0.591 | 135 | 5520±136 | 0.420 |
|              |            | Trend |     |          | 0.256 |     |          | 0.174 |
| <i>MASP1</i> | rs16861729 | CC    | 41  | 6712±172 |       | 72  | 5292±110 |       |
|              |            | CT    | 33  | 6606±196 | 0.782 | 99  | 5516±136 | 0.583 |
|              |            | TT    | 24  | 6104±159 | 0.129 | 51  | 5729±145 | 0.064 |
|              |            | TT+CT | 57  | 6395±182 | 0.371 | 150 | 5589±139 | 0.209 |
|              |            | Trend |     |          | 0.159 |     |          | 0.070 |
| <i>MASP1</i> | rs3821801  | CC    | 86  | 6545±179 |       | 183 | 5542±133 |       |
|              |            | CT    | 15  | 6207±147 | 0.495 | 47  | 5332±131 | 0.308 |
|              |            | TT    | 2   | 7450±148 | 0.248 |     |          |       |
|              |            | TT+CT | 17  | 6353±148 | 0.776 | 47  | 5332±131 | 0.308 |
|              |            | Trend |     |          | 0.941 |     |          | 0.308 |
| <i>MASP1</i> | rs17040    | GG    | 84  | 6568±180 |       | 185 | 5516±132 |       |
|              |            | AG    | 17  | 6135±139 | 0.289 | 45  | 5427±135 | 0.525 |
|              |            | AA    | 2   | 7450±148 | 0.264 |     |          |       |
|              |            | AA+AG | 19  | 6274±142 | 0.514 | 45  | 5427±135 | 0.525 |
|              |            | Trend |     |          | 0.811 |     |          | 0.525 |
| <i>MASP1</i> | rs3733001  | TT    | 49  | 6590±199 |       | 125 | 5535±126 |       |
|              |            | CT    | 43  | 6477±147 | 0.744 | 91  | 5501±146 | 0.520 |
|              |            | CC    | 11  | 6318±160 | 0.484 | 14  | 5157±991 | 0.379 |
|              |            | CC+CT | 54  | 6444±148 | 0.617 | 105 | 5455±141 | 0.426 |
|              |            | Trend |     |          | 0.513 |     |          | 0.347 |
| <i>MASP1</i> | rs3914010  | AA    | 31  | 6155±149 |       | 59  | 5625±141 |       |
|              |            | AG    | 51  | 6590±192 | 0.224 | 121 | 5482±134 | 0.220 |
|              |            | GG    | 21  | 6857±159 | 0.084 | 49  | 5412±120 | 0.294 |
|              |            | GG+AG | 72  | 6668±182 | 0.095 | 170 | 5462±130 | 0.196 |
|              |            | Trend |     |          | 0.072 |     |          | 0.274 |
| <i>MASP1</i> | rs9880761  | AA    | 90  | 6507±180 |       | 185 | 5538±135 |       |
|              |            | AG    | 11  | 6400±121 | 0.918 | 44  | 5325±123 | 0.338 |
|              |            | GG    | 2   | 7450±148 | 0.232 |     |          |       |
|              |            | GG+AG | 13  | 6562±125 | 0.610 | 44  | 5325±123 | 0.338 |
|              |            | Trend |     |          | 0.425 |     |          | 0.338 |
| <i>MASP1</i> | rs11720718 | GG    | 60  | 6618±187 |       | 157 | 5513±126 |       |
|              |            | AG    | 36  | 6397±153 | 0.321 | 69  | 5477±151 | 0.731 |
|              |            | AA    | 7   | 6214±176 | 0.381 | 4   | 5300±469 | 0.283 |
|              |            | AA+AG | 43  | 6367±154 | 0.247 | 73  | 5467±147 | 0.687 |
|              |            | Trend |     |          | 0.229 |     |          | 0.630 |
| <i>MASP1</i> | rs1001073  | AA    | 89  | 6543±178 |       | 184 | 5517±132 |       |
|              |            | AG    | 12  | 6142±140 | 0.492 | 46  | 5424±135 | 0.368 |
|              |            | GG    | 2   | 7450±148 | 0.253 |     |          |       |
|              |            | GG+AG | 14  | 6329±143 | 0.810 | 46  | 5424±135 | 0.368 |
|              |            | Trend |     |          | 0.895 |     |          | 0.368 |
| <i>MASP1</i> | rs16861755 | AA    | 101 | 6525±175 |       | 227 | 5502±133 |       |

|              |            |       |     |          |       |     |          |       |
|--------------|------------|-------|-----|----------|-------|-----|----------|-------|
| <i>MASP1</i> | rs850316   | AG    | 2   | 5950±354 | 0.034 | 3   | 5267±58  | 0.726 |
|              |            | GG    | 56  | 6589±189 |       | 139 | 5567±135 |       |
|              |            | AG    | 37  | 6581±152 | 0.996 | 80  | 5445±131 | 0.298 |
|              |            | AA    | 10  | 5840±157 | 0.072 | 11  | 5027±119 | 0.373 |
|              |            | AA+AG | 47  | 6423±155 | 0.569 | 91  | 5395±130 | 0.218 |
|              |            | Trend |     |          | 0.234 |     | 0.199    |       |
| <i>MASP1</i> | rs3864097  | AA    | 43  | 6433±208 |       | 124 | 5594±135 |       |
|              |            | AG    | 33  | 6727±144 | 0.494 | 72  | 5450±137 | 0.051 |
|              |            | GG    | 27  | 6381±149 | 0.619 | 33  | 5239±114 | 0.162 |
|              |            | GG+AG | 60  | 6572±146 | 0.847 | 105 | 5384±130 | 0.035 |
|              |            |       |     | Trend    |       |     | 0.748    |       |
| <i>MASP1</i> | rs876650   | GG    | 102 | 6515±174 |       | 227 | 5507±133 |       |
|              |            | CG    | 1   | 6400     | 0.614 | 3   | 4833±808 | 0.015 |
| <i>MASP1</i> | rs12489890 | GG    | 100 | 6515±176 |       | 216 | 5504±133 |       |
|              |            | AG    | 3   | 6467±306 | 0.854 | 13  | 5385±132 | 0.890 |
| <i>MASP1</i> | rs874603   | AA    | 101 | 6523±175 |       | 224 | 5511±134 |       |
|              |            | AG    | 2   | 6050±495 | 0.115 | 6   | 5050±565 | 0.098 |
| <i>MASP1</i> | rs850312   | CC    | 60  | 6575±190 |       | 146 | 5596±138 |       |
|              |            | CT    | 36  | 6461±152 | 0.549 | 74  | 5316±123 | 0.046 |
|              |            | TT    | 7   | 6257±153 | 0.331 | 9   | 5556±120 | 0.848 |
|              |            | TT+CT | 43  | 6428±150 | 0.417 | 83  | 5342±122 | 0.068 |
|              |            |       |     | Trend    |       |     | 0.330    |       |
| <i>MASP1</i> | rs696405   | GG    | 83  | 6628±176 |       | 187 | 5497±132 |       |
|              |            | GT    | 18  | 5933±157 | 0.056 | 43  | 5505±138 | 0.686 |
|              |            | TT    | 2   | 7000±212 | 0.776 |     |          |       |
|              |            | TT+GT | 20  | 6040±160 | 0.118 | 43  | 5505±138 | 0.686 |
|              |            |       |     | Trend    |       |     | 0.273    |       |
| <i>MASP1</i> | rs3815623  | AA    | 49  | 6651±194 |       | 123 | 5583±138 |       |
|              |            | AG    | 38  | 6526±152 | 0.763 | 90  | 5434±128 | 0.082 |
|              |            | GG    | 16  | 6063±159 | 0.065 | 16  | 5288±124 | 0.501 |
|              |            | GG+AG | 54  | 6389±154 | 0.354 | 106 | 5412±127 | 0.085 |
|              |            |       |     | Trend    |       |     | 0.127    |       |
| <i>MASP1</i> | rs710459   | AA    | 44  | 6811±158 |       | 85  | 5306±124 |       |
|              |            | AG    | 42  | 6390±181 | 0.132 | 106 | 5557±141 | 0.168 |
|              |            | GG    | 17  | 6047±190 | 0.060 | 38  | 5800±123 | 0.031 |
|              |            | GG+AG | 59  | 6292±182 | 0.044 | 144 | 5621±137 | 0.058 |
|              |            |       |     | Trend    |       |     | 0.032    |       |
| <i>MASP1</i> | rs710462   | GG    | 45  | 6760±198 |       | 104 | 5701±140 |       |
|              |            | GT    | 39  | 6387±158 | 0.264 | 99  | 5420±126 | 0.032 |
|              |            | TT    | 19  | 6189±139 | 0.100 | 25  | 5064±116 | 0.023 |
|              |            | TT+GT | 58  | 6322±151 | 0.149 | 124 | 5348±125 | 0.011 |
|              |            |       |     | Trend    |       |     | 0.097    |       |
| <i>MASP1</i> | rs698090   | TT    | 39  | 6508±178 |       | 74  | 5707±141 |       |
|              |            | CT    | 48  | 6488±172 | 0.894 | 116 | 5419±131 | 0.268 |
|              |            | CC    | 16  | 6606±178 | 0.527 | 39  | 5372±119 | 0.581 |
|              |            | CC+CT | 64  | 6517±172 | 0.732 | 155 | 5407±128 | 0.296 |
|              |            |       |     | Trend    |       |     | 0.558    |       |
| <i>MASP1</i> | rs698092   | AA    | 39  | 6367±162 |       | 92  | 5280±118 |       |
|              |            | AG    | 52  | 6583±171 | 0.593 | 102 | 5501±131 | 0.443 |

|              |           |       |    |          |        |     |          |       |
|--------------|-----------|-------|----|----------|--------|-----|----------|-------|
|              |           | GG    | 12 | 6692±228 | 0.680  | 35  | 6100±157 | 0.012 |
|              |           | GG+AG | 64 | 6603±181 | 0.561  | 137 | 5654±140 | 0.107 |
|              |           | Trend |    |          | 0.578  |     |          | 0.019 |
| <i>MASP1</i> | rs698094  | GG    | 45 | 6776±184 |        | 91  | 5687±142 |       |
|              |           | AG    | 45 | 6269±165 | 0.229  | 103 | 5363±127 | 0.177 |
|              |           | AA    | 13 | 6454±164 | 0.676  | 35  | 5443±121 | 0.396 |
|              |           | AA+AG | 58 | 6310±164 | 0.253  | 138 | 5383±125 | 0.174 |
|              |           | Trend |    |          | 0.403  |     |          | 0.257 |
| <i>MASP1</i> | rs3105782 | AA    | 77 | 6591±177 |        | 179 | 5518±133 |       |
|              |           | AG    | 19 | 6479±177 | 0.822  | 47  | 5515±134 | 0.818 |
|              |           | GG    | 7  | 5757±117 | 0.013  | 3   | 4667±101 | 0.158 |
|              |           | GG+AG | 26 | 6285±164 | 0.362  | 50  | 5464±133 | 0.662 |
|              |           | Trend |    |          | 0.124  |     |          | 0.494 |
| <i>MASP1</i> | rs4686864 | GG    | 51 | 6492±184 |        | 144 | 5561±136 |       |
|              |           | AG    | 47 | 6570±169 | 0.994  | 70  | 5483±129 | 0.981 |
|              |           | AA    | 5  | 6200±114 | 0.990  | 15  | 5053±115 | 0.270 |
|              |           | AA+AG | 52 | 6535±164 | 0.995  | 85  | 5407±127 | 0.672 |
|              |           | Trend |    |          | 0.999  |     |          | 0.429 |
| <i>MASP1</i> | rs1357134 | AA    | 46 | 6946±181 |        | 90  | 5537±127 |       |
|              |           | AG    | 46 | 6165±164 | 0.045  | 104 | 5501±141 | 0.524 |
|              |           | GG    | 11 | 6164±157 | 0.186  | 35  | 5429±124 | 0.743 |
|              |           | GG+AG | 57 | 6165±161 | 0.033  | 139 | 5483±137 | 0.531 |
|              |           | Trend |    |          | 0.049  |     |          | 0.627 |
| <i>MASP1</i> | rs850307  | GG    | 81 | 6526±169 |        | 186 | 5543±131 |       |
|              |           | GT    | 20 | 6600±198 | 0.911  | 43  | 5314±139 | 0.319 |
|              |           | TT    | 2  | 5150±495 | <0.001 | 1   | 5200     | 0.215 |
|              |           | TT+GT | 22 | 6468±194 | 0.868  | 44  | 5311±137 | 0.309 |
|              |           | Trend |    |          | 0.631  |     |          | 0.298 |
| <i>MASP1</i> | rs710469  | AA    | 39 | 6779±171 |        | 74  | 5535±132 |       |
|              |           | AG    | 36 | 6381±184 | 0.180  | 88  | 5433±147 | 0.459 |
|              |           | GG    | 28 | 6314±164 | 0.287  | 66  | 5559±115 | 0.857 |
|              |           | GG+AG | 64 | 6352±174 | 0.161  | 154 | 5487±134 | 0.571 |
|              |           | Trend |    |          | 0.252  |     |          | 0.835 |
| <i>MASP1</i> | rs698102  | CC    | 83 | 6511±171 |        | 189 | 5539±135 |       |
|              |           | CT    | 19 | 6579±194 | 0.909  | 41  | 5312±123 | 0.421 |
|              |           | TT    | 1  | 5500     | <0.001 |     |          |       |
|              |           | TT+CT | 20 | 6525±190 | 0.789  | 41  | 5312±123 | 0.421 |
|              |           | Trend |    |          | 0.657  |     |          | 0.421 |
| <i>MASP1</i> | rs879537  | AA    | 88 | 6507±169 |        | 191 | 5487±139 |       |
|              |           | AT    | 14 | 6564±213 | 0.636  | 37  | 5584±990 | 0.861 |
|              |           | TT    | 1  | 6400     | 0.870  | 1   | 5700     | 0.024 |
|              |           | TT+AT | 15 | 6553±205 | 0.632  | 38  | 5587±977 | 0.934 |
|              |           | Trend |    |          | 0.630  |     |          | 0.974 |
| <i>MASP1</i> | rs3107217 | TT    | 89 | 6444±174 |        | 222 | 5486±131 |       |
|              |           | AT    | 13 | 7000±177 | 0.483  | 7   | 5843±204 | 0.801 |
| <i>MASP1</i> | rs698085  | AA    | 47 | 6930±179 |        | 91  | 5537±127 |       |
|              |           | AG    | 41 | 6044±165 | 0.015  | 102 | 5458±140 | 0.426 |
|              |           | GG    | 15 | 6493±158 | 0.535  | 35  | 5543±133 | 0.983 |
|              |           | GG+AG | 56 | 6164±163 | 0.028  | 137 | 5480±137 | 0.527 |

|              |            |       |     |          |        |       |          |       |
|--------------|------------|-------|-----|----------|--------|-------|----------|-------|
|              |            | Trend |     |          | 0.144  |       |          | 0.775 |
| <i>MASP1</i> | rs698084   | CC    | 82  | 6510±171 |        | 186   | 5528±132 |       |
|              |            | CT    | 19  | 6674±192 | 0.695  | 44    | 5375±135 | 0.522 |
|              |            | TT    | 2   | 5150±495 | <0.001 |       |          |       |
|              |            | TT+CT | 21  | 6529±188 | 0.923  | 44    | 5375±135 | 0.522 |
|              |            | Trend |     |          |        | 0.818 |          | 0.522 |
| <i>MASP1</i> | rs13064994 | GG    | 80  | 6470±179 |        | 147   | 5483±138 |       |
|              |            | AG    | 18  | 6939±165 | 0.373  | 69    | 5528±124 | 0.696 |
|              |            | AA    | 5   | 5680±432 | 0.250  | 12    | 5600±124 | 0.697 |
|              |            | AA+AG | 23  | 6665±155 | 0.593  | 81    | 5538±123 | 0.635 |
|              |            | Trend |     |          |        | 0.894 |          | 0.611 |
| <i>MASP1</i> | rs710474   | GG    | 47  | 6987±172 |        | 104   | 5555±133 |       |
|              |            | AG    | 49  | 6088±166 | 0.008  | 103   | 5528±136 | 0.633 |
|              |            | AA    | 7   | 6314±179 | 0.493  | 22    | 5150±114 | 0.132 |
|              |            | AA+AG | 56  | 6116±166 | 0.010  | 125   | 5462±133 | 0.411 |
|              |            | Trend |     |          |        | 0.036 |          | 0.211 |
| <i>MASP1</i> | rs3107215  | GG    | 86  | 6490±169 |        | 193   | 5511±131 |       |
|              |            | CG    | 15  | 6833±204 | 0.664  | 37    | 5435±144 | 0.741 |
|              |            | CC    | 2   | 5150±495 | <0.001 |       |          |       |
|              |            | CC+CG | 17  | 6635±199 | 0.900  | 37    | 5435±144 | 0.741 |
|              |            | Trend |     |          |        | 0.835 |          | 0.741 |
| <i>MASP1</i> | rs4686870  | CC    | 30  | 6873±169 |        | 78    | 5573±136 |       |
|              |            | CT    | 59  | 6517±178 | 0.245  | 108   | 5590±130 | 0.948 |
|              |            | TT    | 14  | 5729±149 | 0.007  | 42    | 5183±131 | 0.104 |
|              |            | TT+CT | 73  | 6366±174 | 0.070  | 150   | 5476±131 | 0.577 |
|              |            | Trend |     |          |        | 0.009 |          | 0.161 |
| <i>MASP2</i> | rs12711521 | AA    | 52  | 6540±140 |        | 95    | 5694±138 |       |
|              |            | AC    | 34  | 6191±170 | 0.356  | 110   | 5346±132 | 0.057 |
|              |            | CC    | 17  | 7076±255 | 0.353  | 25    | 5428±108 | 0.153 |
|              |            | CC+AC | 51  | 6486±204 | 0.845  | 135   | 5361±127 | 0.043 |
|              |            | Trend |     |          |        | 0.621 |          | 0.053 |
| <i>MASP2</i> | rs6695096  | TT    | 71  | 6455±141 |        | 160   | 5564±131 |       |
|              |            | CT    | 30  | 6463±215 | 0.915  | 64    | 5361±138 | 0.194 |
|              |            | CC    | 2   | 9350±417 | 0.180  | 6     | 5233±100 | 0.324 |
|              |            | CC+CT | 32  | 6644±232 | 0.872  | 70    | 5350±135 | 0.152 |
|              |            | Trend |     |          |        | 0.586 |          | 0.123 |
| <i>MASP2</i> | rs7548659  | TT    | 45  | 6416±139 |        | 128   | 5669±141 |       |
|              |            | GT    | 48  | 6463±175 | 0.885  | 90    | 5299±122 | 0.031 |
|              |            | GG    | 10  | 7200±285 | 0.371  | 12    | 5183±974 | 0.034 |
|              |            | GG+GT | 58  | 6590±197 | 0.617  | 102   | 5285±119 | 0.015 |
|              |            | Trend |     |          |        | 0.414 |          | 0.008 |
| <i>MBL2</i>  | rs12771266 | GG    | 101 | 6481±173 |        | 223   | 5504±134 |       |
|              |            | AG    | 2   | 8150±106 | 0.185  | 7     | 5329±616 | 0.925 |
| <i>MBL2</i>  | rs2506     | AA    | 52  | 6550±185 |        | 147   | 5466±129 |       |
|              |            | AC    | 44  | 6527±161 | 0.245  | 77    | 5512±142 | 0.693 |
|              |            | CC    | 7   | 6157±190 | 0.893  | 6     | 6133±907 | 0.010 |
|              |            | CC+AC | 51  | 6476±163 | 0.349  | 83    | 5557±139 | 0.487 |
|              |            | Trend |     |          |        | 0.596 |          | 0.277 |
| <i>MBL2</i>  | rs930507   | CC    | 63  | 6643±184 |        | 154   | 5483±129 |       |

|             |            |       |    |          |       |     |          |       |
|-------------|------------|-------|----|----------|-------|-----|----------|-------|
|             |            | CG    | 31 | 6465±167 | 0.735 | 62  | 5395±131 | 0.354 |
|             |            | GG    | 9  | 5778±104 | 0.219 | 13  | 5854±135 | 0.240 |
|             |            | GG+CG | 40 | 6310±156 | 0.886 | 75  | 5475±132 | 0.671 |
|             |            | Trend |    |          | 0.509 |     |          | 0.879 |
| <i>MBL2</i> | rs1838066  | GG    | 31 | 6652±166 |       | 66  | 5439±138 |       |
|             |            | AG    | 45 | 6336±192 | 0.754 | 114 | 5457±130 | 0.575 |
|             |            | AA    | 27 | 6652±153 | 0.382 | 50  | 5672±132 | 0.282 |
|             |            | AA+AG | 72 | 6454±178 | 0.856 | 164 | 5523±131 | 0.407 |
|             |            | Trend |    |          | 0.398 |     |          | 0.285 |
| <i>MBL2</i> | rs1982266  | GG    | 47 | 6609±171 |       | 102 | 5480±134 |       |
|             |            | AG    | 45 | 6402±186 | 0.729 | 100 | 5402±133 | 0.471 |
|             |            | AA    | 11 | 6564±141 | 0.647 | 28  | 5911±124 | 0.064 |
|             |            | AA+AG | 56 | 6434±177 | 0.860 | 128 | 5513±132 | 0.994 |
|             |            | Trend |    |          | 0.903 |     |          | 0.306 |
| <i>MBL2</i> | rs920724   | AA    | 70 | 6429±164 |       | 165 | 5478±135 |       |
|             |            | AG    | 32 | 6672±197 | 0.479 | 56  | 5454±125 | 0.605 |
|             |            | GG    | 1  | 7400     | 0.233 | 9   | 6156±138 | 0.105 |
|             |            | GG+AG | 33 | 6694±194 | 0.448 | 65  | 5551±128 | 0.370 |
|             |            | Trend |    |          | 0.398 |     |          | 0.206 |
| <i>MBL2</i> | rs11003132 | CC    | 82 | 6559±180 |       | 170 | 5510±134 |       |
|             |            | CT    | 21 | 6338±151 | 0.697 | 55  | 5465±136 | 0.425 |
|             |            | TT    |    |          |       | 5   | 5480±554 | 0.990 |
|             |            | TT+CT | 21 | 6338±151 | 0.697 | 60  | 5467±131 | 0.434 |
|             |            | Trend |    |          | 0.697 |     |          | 0.455 |
| <i>MBL2</i> | rs11003134 | CC    | 93 | 6578±171 |       | 212 | 5514±133 |       |
|             |            | AC    | 10 | 5910±195 | 0.317 | 15  | 5473±141 | 0.949 |
|             |            | AA    |    |          |       | 1   | 4800     | 0.062 |
|             |            | AA+AC | 10 | 5910±195 | 0.317 | 16  | 5431±137 | 0.988 |
|             |            | Trend |    |          | 0.317 |     |          | 0.970 |
| <i>MBL2</i> | rs10824800 | CC    | 32 | 6622±166 |       | 67  | 5437±137 |       |
|             |            | AC    | 44 | 6273±191 | 0.530 | 109 | 5440±131 | 0.939 |
|             |            | AA    | 27 | 6778±152 | 0.261 | 53  | 5715±131 | 0.233 |
|             |            | AA+AC | 71 | 6465±178 | 0.920 | 162 | 5530±131 | 0.611 |
|             |            | Trend |    |          | 0.282 |     |          | 0.258 |
| <i>MBL2</i> | rs11003137 | GG    | 82 | 6559±180 |       | 174 | 5490±133 |       |
|             |            | AG    | 21 | 6338±151 | 0.697 | 51  | 5531±137 | 0.711 |
|             |            | AA    |    |          |       | 5   | 5480±554 | 0.912 |
|             |            | AA+AG | 21 | 6338±151 | 0.697 | 56  | 5527±132 | 0.724 |
|             |            | Trend |    |          | 0.697 |     |          | 0.747 |
| <i>MBL2</i> | rs10824801 | TT    | 42 | 6664±154 |       | 79  | 5477±136 |       |
|             |            | AT    | 43 | 6353±203 | 0.492 | 125 | 5438±129 | 0.726 |
|             |            | AA    | 18 | 6544±143 | 0.957 | 26  | 5858±138 | 0.070 |
|             |            | AA+AT | 61 | 6410±186 | 0.609 | 151 | 5510±131 | 0.420 |
|             |            | Trend |    |          | 0.869 |     |          | 0.137 |
| <i>MBP</i>  | rs1789256  | TT    | 45 | 6424±169 |       | 112 | 5625±139 |       |
|             |            | CT    | 49 | 6467±173 | 0.882 | 93  | 5419±135 | 0.052 |
|             |            | CC    | 9  | 7211±203 | 0.230 | 25  | 5228±832 | 0.099 |
|             |            | CC+CT | 58 | 6583±179 | 0.601 | 118 | 5379±126 | 0.035 |
|             |            | Trend |    |          | 0.334 |     |          | 0.036 |

|            |            |       |    |          |       |     |          |       |
|------------|------------|-------|----|----------|-------|-----|----------|-------|
| <i>MBP</i> | rs17026    | TT    | 53 | 6936±174 |       | 91  | 5505±139 |       |
|            |            | CT    | 38 | 6097±166 | 0.008 | 111 | 5460±130 | 0.765 |
|            |            | CC    | 12 | 5967±159 | 0.088 | 27  | 5700±122 | 0.437 |
|            |            | CC+CT | 50 | 6066±163 | 0.005 | 138 | 5507±128 | 0.939 |
|            |            | Trend |    |          | 0.015 |     |          | 0.718 |
| <i>MBP</i> | rs470821   | CC    | 52 | 6892±176 |       | 86  | 5464±143 |       |
|            |            | CT    | 36 | 6147±169 | 0.023 | 108 | 5493±127 | 0.833 |
|            |            | TT    | 15 | 6080±159 | 0.061 | 35  | 5654±126 | 0.536 |
|            |            | TT+CT | 51 | 6127±164 | 0.010 | 143 | 5532±126 | 0.725 |
|            |            | Trend |    |          | 0.017 |     |          | 0.583 |
| <i>MBP</i> | rs2279078  | TT    | 53 | 6413±162 |       | 134 | 5615±136 |       |
|            |            | CT    | 43 | 6470±180 | 0.629 | 79  | 5347±134 | 0.083 |
|            |            | CC    | 7  | 7543±210 | 0.084 | 17  | 5288±875 | 0.215 |
|            |            | CC+CT | 50 | 6620±186 | 0.345 | 96  | 5336±126 | 0.060 |
|            |            | Trend |    |          | 0.141 |     |          | 0.059 |
| <i>MBP</i> | rs470934   | GG    | 39 | 6505±198 |       | 95  | 5478±119 |       |
|            |            | GT    | 43 | 6356±136 | 0.911 | 100 | 5413±136 | 0.651 |
|            |            | TT    | 21 | 6852±197 | 0.471 | 35  | 5800±157 | 0.073 |
|            |            | TT+GT | 64 | 6519±159 | 0.685 | 135 | 5513±142 | 0.700 |
|            |            | Trend |    |          | 0.513 |     |          | 0.160 |
| <i>MBP</i> | rs8086634  | CC    | 78 | 6467±171 |       | 185 | 5502±135 |       |
|            |            | CT    | 23 | 6613±190 | 0.635 | 43  | 5477±125 | 0.501 |
|            |            | TT    | 2  | 7200±169 | 0.185 | 2   | 5650±636 | 0.446 |
|            |            | TT+CT | 25 | 6660±186 | 0.521 | 45  | 5484±122 | 0.553 |
|            |            | Trend |    |          | 0.399 |     |          | 0.627 |
| <i>MBP</i> | rs9676140  | GG    | 28 | 6254±186 |       | 68  | 5215±112 |       |
|            |            | CG    | 47 | 6526±184 | 0.567 | 107 | 5571±135 | 0.120 |
|            |            | CC    | 28 | 6754±143 | 0.292 | 55  | 5709±148 | 0.058 |
|            |            | CC+CG | 75 | 6611±169 | 0.430 | 162 | 5618±139 | 0.054 |
|            |            | Trend |    |          | 0.291 |     |          | 0.054 |
| <i>MBP</i> | rs11661054 | CC    | 70 | 6521±171 |       | 129 | 5530±134 |       |
|            |            | AC    | 26 | 6462±174 | 0.680 | 81  | 5526±134 | 0.860 |
|            |            | AA    | 7  | 6629±229 | 0.589 | 20  | 5185±118 | 0.154 |
|            |            | AA+AC | 33 | 6497±183 | 0.928 | 101 | 5458±131 | 0.549 |
|            |            | Trend |    |          | 0.842 |     |          | 0.294 |
| <i>MBP</i> | rs4890785  | CC    | 48 | 6194±163 |       | 124 | 5510±149 |       |
|            |            | CT    | 47 | 6860±188 | 0.032 | 96  | 5461±110 | 0.781 |
|            |            | TT    | 8  | 6400±119 | 0.429 | 9   | 5878±111 | 0.449 |
|            |            | TT+CT | 55 | 6793±179 | 0.034 | 105 | 5497±110 | 0.909 |
|            |            | Trend |    |          | 0.071 |     |          | 0.880 |
| <i>MBP</i> | rs9675994  | CC    | 40 | 6578±154 |       | 89  | 5437±126 |       |
|            |            | CT    | 46 | 6537±178 | 0.854 | 98  | 5630±144 | 0.551 |
|            |            | TT    | 17 | 6300±211 | 0.755 | 43  | 5328±118 | 0.813 |
|            |            | TT+CT | 63 | 6473±186 | 0.989 | 141 | 5538±137 | 0.730 |
|            |            | Trend |    |          | 0.814 |     |          | 0.976 |
| <i>MBP</i> | rs8090438  | AA    | 59 | 6380±158 |       | 137 | 5398±132 |       |
|            |            | AT    | 39 | 6805±177 | 0.097 | 84  | 5649±138 | 0.474 |
|            |            | TT    | 5  | 5820±302 | 0.468 | 8   | 5800±595 | 0.234 |
|            |            | TT+AT | 44 | 6693±193 | 0.281 | 92  | 5662±133 | 0.403 |
|            |            |       |    |          |       |     |          |       |

|            |            |       |    |          |        |     |          |        |
|------------|------------|-------|----|----------|--------|-----|----------|--------|
|            |            | Trend |    |          | 0.761  |     |          | 0.316  |
| <i>MBP</i> | rs8094402  | AA    | 89 | 6530±172 |        | 197 | 5434±131 |        |
|            |            | AG    | 12 | 6408±191 | 0.984  | 32  | 5894±140 | 0.036  |
|            |            | GG    | 2  | 6400±268 | 0.211  | 1   | 5700     | 0.165  |
|            |            | GG+AG | 14 | 6407±191 | 0.770  | 33  | 5888±138 | 0.042  |
|            |            | Trend |    |          | 0.588  |     |          | 0.060  |
| <i>MBP</i> | rs17576751 | CC    | 90 | 6552±172 |        | 195 | 5437±131 |        |
|            |            | CT    | 12 | 6392±192 | 0.915  | 34  | 5847±138 | 0.036  |
|            |            | TT    | 1  | 4500     | <0.001 | 1   | 5700     | 0.164  |
|            |            | TT+CT | 13 | 6246±191 | 0.667  | 35  | 5843±136 | 0.042  |
|            |            | Trend |    |          | 0.458  |     |          | 0.060  |
| <i>MBP</i> | rs4890875  | AA    | 58 | 6762±164 |        | 129 | 5578±132 |        |
|            |            | AG    | 37 | 6349±191 | 0.160  | 78  | 5350±127 | 0.421  |
|            |            | GG    | 8  | 5475±113 | 0.008  | 21  | 5610±157 | 0.729  |
|            |            | GG+AG | 45 | 6193±182 | 0.053  | 99  | 5405±134 | 0.425  |
|            |            | Trend |    |          | 0.011  |     |          | 0.515  |
| <i>MBP</i> | rs470498   | GG    | 23 | 6152±189 |        | 54  | 5728±144 |        |
|            |            | CG    | 51 | 6531±172 | 0.440  | 129 | 5406±129 | 0.374  |
|            |            | CC    | 29 | 6769±165 | 0.285  | 47  | 5489±129 | 0.298  |
|            |            | CC+CG | 80 | 6618±169 | 0.335  | 176 | 5428±129 | 0.303  |
|            |            | Trend |    |          | 0.289  |     |          | 0.290  |
| <i>MBP</i> | rs2974260  | GG    | 65 | 6454±170 |        | 140 | 5485±136 |        |
|            |            | GT    | 32 | 6863±182 | 0.226  | 82  | 5409±125 | 0.818  |
|            |            | TT    | 6  | 5300±110 | 0.011  | 8   | 6663±100 | <0.001 |
|            |            | TT+GT | 38 | 6616±181 | 0.623  | 90  | 5520±128 | 0.384  |
|            |            | Trend |    |          | 0.723  |     |          | 0.097  |
| <i>MBP</i> | rs3794845  | GG    | 79 | 6672±179 |        | 165 | 5390±129 |        |
|            |            | CG    | 23 | 5913±145 | 0.078  | 62  | 5763±141 | 0.265  |
|            |            | CC    | 1  | 7800     | <0.001 | 3   | 6033±709 | 0.028  |
|            |            | CC+CG | 24 | 5992±147 | 0.123  | 65  | 5775±138 | 0.206  |
|            |            | Trend |    |          | 0.250  |     |          | 0.139  |
| <i>MBP</i> | rs470895   | AA    | 87 | 6492±180 |        | 187 | 5420±130 |        |
|            |            | AG    | 13 | 6446±144 | 0.692  | 40  | 5828±142 | 0.436  |
|            |            | GG    | 3  | 7433±473 | 0.047  | 2   | 6100±990 | 0.101  |
|            |            | GG+AG | 16 | 6631±136 | 0.447  | 42  | 5840±140 | 0.359  |
|            |            | Trend |    |          | 0.275  |     |          | 0.280  |
| <i>MBP</i> | rs10514234 | TT    | 91 | 6509±177 |        | 192 | 5453±132 |        |
|            |            | CT    | 6  | 5750±168 | 0.709  | 32  | 5591±135 | 0.730  |
|            |            | CC    | 5  | 7580±482 | 0.011  | 6   | 6483±126 | 0.023  |
|            |            | CC+CT | 11 | 6582±155 | 0.513  | 38  | 5732±136 | 0.791  |
|            |            | Trend |    |          | 0.192  |     |          | 0.393  |
| <i>MBP</i> | rs3794842  | CC    | 88 | 6663±174 |        | 200 | 5458±132 |        |
|            |            | CT    | 15 | 5640±147 | 0.029  | 28  | 5821±141 | 0.115  |
| <i>MBP</i> | rs470681   | CC    | 27 | 6726±179 |        | 53  | 5534±123 |        |
|            |            | CT    | 49 | 6488±159 | 0.787  | 131 | 5354±131 | 0.847  |
|            |            | TT    | 25 | 6316±204 | 0.554  | 46  | 5870±143 | 0.169  |
|            |            | TT+CT | 74 | 6430±174 | 0.652  | 177 | 5488±136 | 0.720  |
|            |            | Trend |    |          | 0.555  |     |          | 0.183  |
| <i>MBP</i> | rs3794834  | CC    | 67 | 6303±182 |        | 142 | 5465±139 |        |

|            |            |       |     |          |        |     |          |       |
|------------|------------|-------|-----|----------|--------|-----|----------|-------|
|            |            | CG    | 29  | 6993±141 | 0.005  | 82  | 5487±121 | 0.644 |
|            |            | GG    | 7   | 6543±194 | 0.263  | 6   | 6450±114 | 0.008 |
|            |            | GG+CG | 36  | 6906±151 | 0.005  | 88  | 5552±122 | 0.932 |
|            |            | Trend |     |          | 0.020  |     |          | 0.640 |
| <i>MBP</i> | rs17576996 | AA    | 91  | 6410±163 |        | 202 | 5470±132 |       |
|            |            | AC    | 11  | 7555±224 | 0.058  | 26  | 5627±138 | 0.469 |
|            |            | CC    | 1   | 4500     | <0.001 | 2   | 6750±148 | 0.008 |
|            |            | CC+AC | 12  | 7300±231 | 0.194  | 28  | 5707±139 | 0.306 |
|            |            | Trend |     |          | 0.510  |     |          | 0.181 |
| <i>MBP</i> | rs470261   | AA    | 101 | 6514±174 |        | 222 | 5465±133 |       |
|            |            | AG    | 2   | 6500±183 | 0.870  | 8   | 6438±802 | 0.001 |
| <i>MBP</i> | rs4890788  | CC    | 63  | 6554±186 |        | 137 | 5392±121 |       |
|            |            | CT    | 35  | 6494±153 | 0.612  | 78  | 5764±152 | 0.331 |
|            |            | TT    | 5   | 6140±179 | 0.757  | 14  | 5150±108 | 0.401 |
|            |            | TT+CT | 40  | 6450±155 | 0.719  | 92  | 5671±147 | 0.503 |
|            |            | Trend |     |          | 0.893  |     |          | 0.836 |
| <i>MBP</i> | rs2282557  | CC    | 62  | 6439±183 |        | 106 | 5690±131 |       |
|            |            | CT    | 34  | 6585±166 | 0.870  | 98  | 5313±134 | 0.060 |
|            |            | TT    | 6   | 6600±134 | 0.441  | 24  | 5225±100 | 0.225 |
|            |            | TT+CT | 40  | 6588±160 | 0.985  | 122 | 5296±127 | 0.046 |
|            |            | Trend |     |          | 0.842  |     |          | 0.065 |
| <i>MBP</i> | rs7232502  | CC    | 42  | 6317±167 |        | 67  | 5631±162 |       |
|            |            | CT    | 44  | 6523±169 | 0.462  | 104 | 5392±122 | 0.344 |
|            |            | TT    | 17  | 6976±202 | 0.382  | 57  | 5553±114 | 0.797 |
|            |            | TT+CT | 61  | 6649±178 | 0.352  | 161 | 5449±119 | 0.590 |
|            |            | Trend |     |          | 0.332  |     |          | 0.850 |
| <i>MBP</i> | rs921336   | GG    | 45  | 6533±171 |        | 89  | 5493±148 |       |
|            |            | GT    | 47  | 6602±167 | 0.640  | 107 | 5582±127 | 0.656 |
|            |            | TT    | 11  | 6055±220 | 0.239  | 34  | 5250±106 | 0.675 |
|            |            | TT+GT | 58  | 6498±177 | 0.948  | 141 | 5502±123 | 0.835 |
|            |            | Trend |     |          | 0.473  |     |          | 0.864 |
| <i>MBP</i> | rs17660901 | CC    | 60  | 6553±188 |        | 141 | 5475±120 |       |
|            |            | CG    | 40  | 6525±149 | 0.447  | 73  | 5525±133 | 0.703 |
|            |            | GG    | 3   | 5567±210 | 0.143  | 15  | 5573±230 | 0.960 |
|            |            | GG+CG | 43  | 6458±153 | 0.784  | 88  | 5533±152 | 0.761 |
|            |            | Trend |     |          | 0.811  |     |          | 0.862 |
| <i>MBP</i> | rs2282574  | GG    | 72  | 6264±166 |        | 159 | 5377±131 |       |
|            |            | AG    | 25  | 7148±181 | 0.004  | 67  | 5825±131 | 0.030 |
|            |            | AA    | 6   | 6867±189 | 0.689  | 4   | 4850±169 | 0.548 |
|            |            | AA+AG | 31  | 7094±179 | 0.008  | 71  | 5770±134 | 0.070 |
|            |            | Trend |     |          | 0.055  |     |          | 0.222 |
| <i>MCP</i> | rs2761435  | GG    | 72  | 6558±178 |        | 142 | 5587±143 |       |
|            |            | CG    | 29  | 6469±167 | 0.636  | 74  | 5257±106 | 0.044 |
|            |            | CC    | 2   | 5550±106 | 0.045  | 14  | 5879±134 | 0.954 |
|            |            | CC+CG | 31  | 6410±165 | 0.515  | 88  | 5356±112 | 0.071 |
|            |            | Trend |     |          | 0.379  |     |          | 0.182 |
| <i>MCP</i> | rs4844390  | AA    | 102 | 6546±171 |        | 226 | 5496±132 |       |
|            |            | AG    | 1   | 3200     | <0.001 | 4   | 5625±180 | 0.823 |
| <i>MCP</i> | rs17006738 | GG    | 98  | 6481±176 |        | 221 | 5486±132 |       |



|                |            |       |     |          |       |     |          |       |
|----------------|------------|-------|-----|----------|-------|-----|----------|-------|
| <i>MCP</i>     | rs6671947  | AG    | 5   | 7160±109 | 0.424 | 9   | 5800±158 | 0.752 |
|                |            | CC    | 82  | 6549±176 |       | 172 | 5537±139 |       |
|                |            | CG    | 21  | 6376±167 | 0.618 | 52  | 5354±116 | 0.424 |
|                |            | GG    |     |          |       | 6   | 5667±857 | 0.491 |
|                |            | GG+CG | 21  | 6376±167 | 0.618 | 58  | 5386±113 | 0.381 |
|                |            | Trend |     |          | 0.618 |     | 0.350    |       |
| <i>MCP</i>     | rs2796278  | CC    | 34  | 6612±182 |       | 66  | 5568±134 |       |
|                |            | AC    | 54  | 6500±173 | 0.659 | 120 | 5565±142 | 0.975 |
|                |            | AA    | 15  | 6340±167 | 0.713 | 44  | 5214±971 | 0.145 |
|                |            | AA+AC | 69  | 6465±170 | 0.639 | 164 | 5471±132 | 0.619 |
|                |            | Trend |     |          | 0.667 |     |          | 0.199 |
| <i>MCP</i>     | rs1962149  | GG    | 81  | 6590±173 |       | 167 | 5540±138 |       |
|                |            | AG    | 22  | 6232±176 | 0.314 | 57  | 5361±119 | 0.347 |
|                |            | AA    |     |          |       | 6   | 5667±857 | 0.472 |
|                |            | AA+AG | 22  | 6232±176 | 0.314 | 63  | 5390±116 | 0.312 |
|                |            | Trend |     |          | 0.314 |     |          | 0.288 |
| <i>MCP</i>     | rs7541230  | TT    | 70  | 6551±180 |       | 161 | 5524±140 |       |
|                |            | CT    | 22  | 6355±153 | 0.304 | 62  | 5413±119 | 0.636 |
|                |            | CC    | 9   | 6944±191 | 0.545 | 6   | 5667±857 | 0.520 |
|                |            | CC+CT | 31  | 6526±164 | 0.607 | 68  | 5435±116 | 0.586 |
|                |            | Trend |     |          | 0.981 |     |          | 0.534 |
| <i>MEFV</i>    | rs186493   | GG    | 39  | 6164±167 |       | 55  | 5642±136 |       |
|                |            | GT    | 39  | 6913±183 | 0.033 | 114 | 5411±143 | 0.393 |
|                |            | TT    | 25  | 6436±162 | 0.213 | 60  | 5553±109 | 0.588 |
|                |            | TT+GT | 64  | 6727±175 | 0.038 | 174 | 5460±132 | 0.702 |
|                |            | Trend |     |          | 0.142 |     |          | 0.549 |
| <i>MEFV</i>    | rs224234   | AA    | 42  | 6088±149 |       | 76  | 5550±132 |       |
|                |            | AC    | 46  | 6652±189 | 0.208 | 112 | 5506±140 | 0.831 |
|                |            | CC    | 15  | 7280±164 | 0.003 | 41  | 5412±116 | 0.940 |
|                |            | CC+AC | 61  | 6807±184 | 0.040 | 153 | 5481±133 | 0.845 |
|                |            | Trend |     |          | 0.005 |     |          | 0.909 |
| <i>MEFV</i>    | rs224205   | TT    | 39  | 6026±151 |       | 67  | 5552±134 |       |
|                |            | CT    | 45  | 6709±191 | 0.134 | 111 | 5452±140 | 0.934 |
|                |            | CC    | 19  | 7053±155 | 0.004 | 51  | 5553±116 | 0.463 |
|                |            | CC+CT | 64  | 6811±181 | 0.025 | 162 | 5484±132 | 0.812 |
|                |            | Trend |     |          | 0.004 |     |          | 0.489 |
| <i>MEFV</i>    | rs224215   | AA    | 102 | 6516±174 |       | 221 | 5519±134 |       |
|                |            | AG    | 1   | 6300     | 0.029 | 9   | 5011±655 | 0.963 |
| <i>MEFV</i>    | rs224225   | AA    | 63  | 6583±163 |       | 155 | 5481±140 |       |
|                |            | AG    | 17  | 6071±215 | 0.219 | 67  | 5481±113 | 0.842 |
|                |            | GG    | 13  | 6615±190 | 0.884 | 7   | 6186±153 | 0.159 |
|                |            | GG+AG | 30  | 6307±203 | 0.450 | 74  | 5547±118 | 0.579 |
|                |            | Trend |     |          | 0.741 |     |          | 0.362 |
| <i>SLC2A11</i> | rs1984309  | AA    | 34  | 6621±139 |       | 79  | 5456±125 |       |
|                |            | AG    | 48  | 6367±205 | 0.306 | 103 | 5626±137 | 0.242 |
|                |            | GG    | 21  | 6676±150 | 0.907 | 46  | 5352±134 | 0.736 |
|                |            | GG+AG | 69  | 6461±189 | 0.385 | 149 | 5542±136 | 0.482 |
|                |            | Trend |     |          | 0.722 |     |          | 0.921 |
| <i>MIF</i>     | rs12628766 | TT    | 82  | 6576±179 |       | 170 | 5446±134 |       |

|            |            |       |    |          |       |     |          |       |
|------------|------------|-------|----|----------|-------|-----|----------|-------|
|            |            | GT    | 21 | 6271±150 | 0.548 | 55  | 5700±133 | 0.147 |
|            |            | GG    |    |          |       | 5   | 5060±288 | 0.705 |
|            |            | GG+GT | 21 | 6271±150 | 0.548 | 60  | 5647±128 | 0.148 |
|            |            | Trend |    |          | 0.548 |     |          | 0.162 |
| <i>MIF</i> | rs875643   | GG    | 46 | 6198±160 |       | 130 | 5447±133 |       |
|            |            | AG    | 48 | 6763±193 | 0.161 | 81  | 5567±119 | 0.659 |
|            |            | AA    | 9  | 6800±111 | 0.078 | 19  | 5563±182 | 0.769 |
|            |            | AA+AG | 57 | 6768±181 | 0.104 | 100 | 5566±132 | 0.625 |
|            |            | Trend |    |          | 0.064 |     |          | 0.647 |
| <i>MIF</i> | rs738806   | GG    | 33 | 6624±139 |       | 85  | 5512±131 |       |
|            |            | AG    | 58 | 6500±200 | 0.393 | 109 | 5631±132 | 0.389 |
|            |            | AA    | 12 | 6275±126 | 0.352 | 35  | 5089±135 | 0.118 |
|            |            | AA+AG | 70 | 6461±189 | 0.321 | 144 | 5499±134 | 0.990 |
|            |            | Trend |    |          | 0.270 |     |          | 0.257 |
| <i>MIF</i> | rs738807   | CC    | 68 | 6587±173 |       | 144 | 5486±138 |       |
|            |            | CT    | 32 | 6434±183 | 0.898 | 75  | 5552±124 | 0.867 |
|            |            | TT    | 3  | 5700±693 | 0.195 | 10  | 5400±131 | 0.753 |
|            |            | TT+CT | 35 | 6371±177 | 0.713 | 85  | 5534±124 | 0.954 |
|            |            | Trend |    |          | 0.495 |     |          | 0.947 |
| <i>MIF</i> | rs2000466  | TT    | 65 | 6546±174 |       | 135 | 5482±131 |       |
|            |            | GT    | 34 | 6524±184 | 0.984 | 85  | 5558±137 | 0.840 |
|            |            | GG    | 4  | 5900±693 | 0.271 | 9   | 5322±136 | 0.611 |
|            |            | GG+GT | 38 | 6458±176 | 0.820 | 94  | 5535±136 | 0.955 |
|            |            | Trend |    |          | 0.603 |     |          | 0.901 |
| <i>MIF</i> | rs17004044 | TT    | 83 | 6516±176 |       | 171 | 5435±134 |       |
|            |            | CT    | 20 | 6505±169 | 0.987 | 54  | 5741±132 | 0.115 |
|            |            | CC    |    |          |       | 5   | 5060±288 | 0.702 |
|            |            | CC+CT | 20 | 6505±169 | 0.987 | 59  | 5683±128 | 0.116 |
|            |            | Trend |    |          | 0.987 |     |          | 0.130 |
| <i>MIF</i> | rs5760093  | AA    | 33 | 6858±153 |       | 84  | 5596±144 |       |
|            |            | AG    | 57 | 6356±187 | 0.063 | 107 | 5545±121 | 0.880 |
|            |            | GG    | 13 | 6331±161 | 0.343 | 38  | 5184±136 | 0.170 |
|            |            | GG+AG | 70 | 6351±181 | 0.056 | 145 | 5450±126 | 0.475 |
|            |            | Trend |    |          | 0.118 |     |          | 0.212 |
| <i>MIF</i> | rs17004047 | AA    | 96 | 6522±175 |       | 217 | 5518±132 |       |
|            |            | AG    | 7  | 6400±163 | 0.704 | 13  | 5169±137 | 0.640 |
| <i>MIF</i> | rs1007888  | CC    | 24 | 6317±152 |       | 55  | 5413±134 |       |
|            |            | CT    | 55 | 6247±169 | 0.759 | 124 | 5527±125 | 0.780 |
|            |            | TT    | 24 | 7321±185 | 0.029 | 50  | 5548±151 | 0.776 |
|            |            | TT+CT | 79 | 6573±180 | 0.631 | 174 | 5533±133 | 0.760 |
|            |            | Trend |    |          | 0.031 |     |          | 0.775 |
| <i>MIF</i> | rs2000467  | GG    | 28 | 7250±184 |       | 56  | 5507±149 |       |
|            |            | AG    | 54 | 6259±167 | 0.010 | 126 | 5519±125 | 0.945 |
|            |            | AA    | 21 | 6186±153 | 0.020 | 47  | 5460±134 | 0.942 |
|            |            | AA+AG | 75 | 6239±162 | 0.005 | 173 | 5503±127 | 0.979 |
|            |            | Trend |    |          | 0.014 |     |          | 0.949 |
| <i>LPO</i> | rs8178407  | AA    | 61 | 6434±182 |       | 145 | 5393±129 |       |
|            |            | AG    | 34 | 6574±166 | 0.379 | 77  | 5630±132 | 0.035 |
|            |            | GG    | 8  | 6863±147 | 0.231 | 8   | 6150±182 | 0.202 |

|             |            |       |     |          |        |     |          |        |
|-------------|------------|-------|-----|----------|--------|-----|----------|--------|
|             |            | GG+AG | 42  | 6629±161 | 0.250  | 85  | 5679±137 | 0.018  |
|             |            | Trend |     |          | 0.186  |     |          | 0.020  |
| <i>MPO</i>  | rs2071409  | TT    | 85  | 6486±173 |        | 192 | 5382±125 |        |
|             |            | GT    | 18  | 6644±179 | 0.356  | 34  | 5915±149 | 0.014  |
|             |            | GG    |     |          |        | 4   | 7550±142 | <0.001 |
|             |            | GG+GT | 18  | 6644±179 | 0.356  | 38  | 6087±155 | 0.002  |
|             |            | Trend |     |          | 0.356  |     |          | <0.001 |
| <i>MPO</i>  | rs2243828  | AA    | 75  | 6519±181 |        | 180 | 5399±130 |        |
|             |            | AG    | 19  | 6211±129 | 0.879  | 40  | 5735±115 | 0.146  |
|             |            | GG    | 7   | 7071±216 | 0.563  | 8   | 5988±194 | 0.556  |
|             |            | GG+AG | 26  | 6442±157 | 0.830  | 48  | 5777±129 | 0.140  |
|             |            | Trend |     |          | 0.686  |     |          | 0.210  |
| <i>MPO</i>  | rs4401102  | CC    | 77  | 6538±180 |        | 180 | 5399±130 |        |
|             |            | CT    | 25  | 6492±158 | 0.722  | 42  | 5831±128 | 0.088  |
|             |            | TT    | 1   | 5200     | 0.008  | 8   | 5988±194 | 0.587  |
|             |            | TT+CT | 26  | 6442±157 | 0.826  | 50  | 5856±138 | 0.092  |
|             |            | Trend |     |          | 0.971  |     |          | 0.166  |
| <i>MPO</i>  | rs12452417 | GG    | 103 | 6514±174 |        | 227 | 5494±133 |        |
|             |            | AG    |     |          |        | 3   | 5833±125 | 0.825  |
| <i>MUC6</i> | rs10902076 | CC    | 74  | 6603±173 |        | 165 | 5500±133 |        |
|             |            | CG    | 26  | 6362±183 | 0.691  | 61  | 5528±137 | 0.362  |
|             |            | GG    | 3   | 5633±121 | 0.021  | 4   | 5000±787 | 0.183  |
|             |            | GG+CG | 29  | 6286±177 | 0.486  | 65  | 5495±134 | 0.431  |
|             |            | Trend |     |          | 0.298  |     |          | 0.543  |
| <i>MUC6</i> | rs11245935 | CC    | 89  | 6582±178 |        | 191 | 5489±131 |        |
|             |            | CT    | 13  | 5946±135 | 0.034  | 35  | 5489±144 | 0.696  |
|             |            | TT    | 1   | 7800     | <0.001 | 3   | 6567±681 | 0.086  |
|             |            | TT+CT | 14  | 6079±138 | 0.092  | 38  | 5574±142 | 0.516  |
|             |            | Trend |     |          | 0.294  |     |          | 0.357  |
| <i>MUC6</i> | rs11245936 | GG    | 89  | 6582±178 |        | 191 | 5489±131 |        |
|             |            | AG    | 13  | 5946±135 | 0.034  | 35  | 5489±144 | 0.696  |
|             |            | AA    | 1   | 7800     | <0.001 | 3   | 6567±681 | 0.086  |
|             |            | AA+AG | 14  | 6079±138 | 0.092  | 38  | 5574±142 | 0.516  |
|             |            | Trend |     |          | 0.294  |     |          | 0.357  |
| <i>MUC6</i> | rs7934606  | CC    | 100 | 6526±176 |        | 225 | 5490±131 |        |
|             |            | CT    | 3   | 6100±624 | 0.418  | 4   | 6250±212 | 0.749  |
| <i>MUC6</i> | rs10902089 | AA    | 82  | 6613±184 |        | 180 | 5451±131 |        |
|             |            | AG    | 18  | 5911±117 | 0.031  | 46  | 5637±140 | 0.198  |
|             |            | GG    | 3   | 7400±872 | 0.009  | 3   | 6567±681 | 0.072  |
|             |            | GG+AG | 21  | 6124±123 | 0.167  | 49  | 5694±138 | 0.131  |
|             |            | Trend |     |          | 0.559  |     |          | 0.078  |
| <i>MUC6</i> | rs10794293 | CC    | 101 | 6515±175 |        | 227 | 5480±131 |        |
|             |            | CT    | 2   | 6450±212 | 0.073  | 3   | 6900±205 | 0.202  |
| <i>MUC6</i> | rs7480563  | CC    | 100 | 6526±176 |        | 225 | 5516±133 |        |
|             |            | CT    | 3   | 6100±624 | 0.418  | 4   | 4800±133 | 0.113  |
| <i>MUC6</i> | rs7126405  | TT    | 95  | 6537±178 |        | 207 | 5457±128 |        |
|             |            | CT    | 8   | 6238±114 | 0.749  | 22  | 5936±172 | 0.165  |
| <i>MUC6</i> | rs4077757  | TT    | 95  | 6537±178 |        | 208 | 5452±127 |        |
|             |            | AT    | 8   | 6238±114 | 0.749  | 22  | 5936±172 | 0.161  |

|              |            |       |    |          |       |     |          |       |
|--------------|------------|-------|----|----------|-------|-----|----------|-------|
| <i>MUC6</i>  | rs4077759  | TT    | 48 | 6394±163 |       | 101 | 5455±128 |       |
|              |            | CT    | 46 | 6676±185 | 0.463 | 107 | 5479±140 | 0.865 |
|              |            | CC    | 9  | 6322±184 | 0.910 | 22  | 5795±119 | 0.493 |
|              |            | CC+CT | 55 | 6618±183 | 0.496 | 129 | 5533±137 | 0.758 |
|              |            | Trend |    |          | 0.628 |     |          | 0.606 |
| <i>MUC6</i>  | rs7952385  | CC    | 57 | 6444±161 |       | 123 | 5527±132 |       |
|              |            | CT    | 40 | 6710±196 | 0.476 | 92  | 5454±140 | 0.672 |
|              |            | TT    | 6  | 5867±132 | 0.380 | 15  | 5540±934 | 0.739 |
|              |            | TT+CT | 46 | 6600±190 | 0.649 | 107 | 5466±134 | 0.647 |
|              |            | Trend |    |          | 0.965 |     |          | 0.635 |
| <i>MUC7</i>  | rs13149271 | AA    | 78 | 6527±171 |       | 171 | 5481±123 |       |
|              |            | AG    | 25 | 6472±187 | 0.880 | 55  | 5467±158 | 0.882 |
|              |            | GG    |    |          |       | 4   | 6675±113 | 0.026 |
|              |            | GG+AG | 25 | 6472±187 | 0.880 | 59  | 5549±157 | 0.575 |
|              |            | Trend |    |          | 0.880 |     |          | 0.306 |
| <i>MUC7</i>  | rs4629524  | AA    | 78 | 6527±171 |       | 171 | 5481±123 |       |
|              |            | AG    | 25 | 6472±187 | 0.880 | 55  | 5467±158 | 0.882 |
|              |            | GG    |    |          |       | 4   | 6675±113 | 0.026 |
|              |            | GG+AG | 25 | 6472±187 | 0.880 | 59  | 5549±157 | 0.575 |
|              |            | Trend |    |          | 0.880 |     |          | 0.306 |
| <i>MUC7</i>  | rs2306950  | AA    | 66 | 6448±183 |       | 160 | 5519±138 |       |
|              |            | AT    | 31 | 6694±164 | 0.396 | 61  | 5395±125 | 0.221 |
|              |            | TT    | 6  | 6300±119 | 0.977 | 9   | 5844±817 | 0.163 |
|              |            | TT+AT | 37 | 6630±157 | 0.442 | 70  | 5453±121 | 0.389 |
|              |            | Trend |    |          | 0.549 |     |          | 0.713 |
| <i>MUC7</i>  | rs10003641 | TT    | 29 | 6314±189 |       | 72  | 5378±119 |       |
|              |            | CT    | 53 | 6653±173 | 0.316 | 122 | 5530±145 | 0.531 |
|              |            | CC    | 21 | 6438±158 | 0.910 | 36  | 5636±116 | 0.038 |
|              |            | CC+CT | 74 | 6592±168 | 0.409 | 158 | 5554±139 | 0.258 |
|              |            | Trend |    |          | 0.749 |     |          | 0.064 |
| <i>MUC7</i>  | rs6826961  | CC    | 43 | 6312±167 |       | 104 | 5488±125 |       |
|              |            | CG    | 45 | 6662±192 | 0.413 | 109 | 5455±143 | 0.652 |
|              |            | GG    | 15 | 6647±132 | 0.318 | 17  | 5841±104 | 0.154 |
|              |            | GG+CG | 60 | 6658±178 | 0.321 | 126 | 5507±139 | 0.959 |
|              |            | Trend |    |          | 0.276 |     |          | 0.569 |
| <i>MUC7</i>  | rs3733492  | TT    | 64 | 6388±190 |       | 153 | 5528±138 |       |
|              |            | CT    | 33 | 6748±152 | 0.238 | 71  | 5482±124 | 0.945 |
|              |            | CC    | 6  | 6567±898 | 0.255 | 6   | 4950±942 | 0.301 |
|              |            | CC+CT | 39 | 6721±143 | 0.182 | 77  | 5440±123 | 0.903 |
|              |            | Trend |    |          | 0.153 |     |          | 0.712 |
| <i>MUC7</i>  | rs6600832  | TT    | 41 | 6341±134 |       | 124 | 5634±136 |       |
|              |            | CT    | 17 | 6800±246 | 0.269 | 82  | 5366±123 | 0.082 |
|              |            | CC    | 21 | 6148±171 | 0.363 | 21  | 5114±113 | 0.007 |
|              |            | CC+CT | 38 | 6439±208 | 0.838 | 103 | 5315±121 | 0.017 |
|              |            | Trend |    |          | 0.583 |     |          | 0.004 |
| <i>ACAA1</i> | rs2239621  | CC    | 41 | 6320±182 |       | 107 | 5670±141 |       |
|              |            | CT    | 52 | 6869±160 | 0.059 | 95  | 5328±129 | 0.030 |
|              |            | TT    | 10 | 5460±167 | 0.216 | 28  | 5421±105 | 0.555 |
|              |            | TT+CT | 62 | 6642±168 | 0.208 | 123 | 5350±123 | 0.048 |

|                 |            |       |     |          |       |     |          |        |
|-----------------|------------|-------|-----|----------|-------|-----|----------|--------|
|                 |            | Trend |     |          | 0.952 |     |          | 0.167  |
| <i>MYD88</i>    | rs7744     | AA    | 47  | 6279±147 |       | 106 | 5406±121 |        |
|                 |            | AG    | 43  | 6777±196 | 0.273 | 94  | 5486±138 | 0.397  |
|                 |            | GG    | 13  | 6492±187 | 0.713 | 30  | 5867±150 | 0.081  |
|                 |            | GG+AG | 56  | 6711±192 | 0.286 | 124 | 5578±142 | 0.160  |
|                 |            | Trend |     |          | 0.445 |     |          | 0.075  |
| <i>MYD88</i>    | rs9881120  | AA    | 100 | 6511±175 |       | 225 | 5475±132 |        |
|                 |            | AT    |     |          |       | 5   | 6580±111 | 0.002  |
| <i>NCF2</i>     | rs3843293  | TT    | 44  | 6916±185 |       | 91  | 5782±143 |        |
|                 |            | GT    | 43  | 6202±165 | 0.014 | 107 | 5322±125 | 0.010  |
|                 |            | GG    | 16  | 6244±148 | 0.125 | 31  | 5313±113 | 0.055  |
|                 |            | GG+GT | 59  | 6214±160 | 0.013 | 138 | 5320±122 | 0.006  |
|                 |            | Trend |     |          | 0.049 |     |          | 0.013  |
| <i>NCF2</i>     | rs12753665 | AA    | 31  | 6919±205 |       | 68  | 5790±150 |        |
|                 |            | AG    | 53  | 6236±157 | 0.143 | 121 | 5397±126 | 0.074  |
|                 |            | GG    | 19  | 6626±156 | 0.789 | 40  | 5343±116 | 0.023  |
|                 |            | GG+AG | 72  | 6339±157 | 0.226 | 161 | 5383±123 | 0.035  |
|                 |            | Trend |     |          | 0.647 |     |          | 0.020  |
| <i>NCF2</i>     | rs10797888 | TT    | 80  | 6456±181 |       | 178 | 5486±136 |        |
|                 |            | CT    | 21  | 6633±144 | 0.410 | 50  | 5586±123 | 0.899  |
|                 |            | CC    | 2   | 7550±176 | 0.051 | 1   | 4600     | <0.001 |
|                 |            | CC+CT | 23  | 6713±145 | 0.220 | 51  | 5567±123 | 0.855  |
|                 |            | Trend |     |          | 0.112 |     |          | 0.803  |
| <i>NCF2</i>     | rs3845466  | GG    | 66  | 6652±174 |       | 150 | 5638±137 |        |
|                 |            | AG    | 27  | 6267±175 | 0.159 | 73  | 5263±123 | 0.076  |
|                 |            | AA    | 10  | 6270±178 | 0.419 | 7   | 4971±112 | 0.258  |
|                 |            | AA+AG | 37  | 6268±173 | 0.132 | 80  | 5238±121 | 0.049  |
|                 |            | Trend |     |          | 0.195 |     |          | 0.042  |
| <i>NCF2</i>     | rs11588654 | TT    | 82  | 6587±169 |       | 171 | 5482±139 |        |
|                 |            | CT    | 21  | 6229±194 | 0.475 | 55  | 5553±113 | 0.344  |
|                 |            | CC    |     |          |       | 3   | 5833±106 | 0.275  |
|                 |            | CC+CT | 21  | 6229±194 | 0.475 | 58  | 5567±112 | 0.300  |
|                 |            | Trend |     |          | 0.475 |     |          | 0.244  |
| <i>NCF2</i>     | rs11579965 | CC    | 95  | 6511±177 |       | 217 | 5504±134 |        |
|                 |            | CG    | 7   | 6814±132 | 0.298 | 12  | 5375±123 | 0.085  |
|                 |            | GG    | 1   | 4700     | 0.002 |     |          |        |
|                 |            | GG+CG | 8   | 6550±143 | 0.585 | 12  | 5375±123 | 0.085  |
|                 |            | Trend |     |          | 0.923 |     |          | 0.085  |
| <i>NCF2</i>     | rs2333686  | CC    | 75  | 6567±172 |       | 162 | 5488±141 |        |
|                 |            | CT    | 28  | 6371±180 | 0.425 | 62  | 5539±114 | 0.318  |
|                 |            | TT    |     |          |       | 5   | 5580±829 | 0.318  |
|                 |            | TT+CT | 28  | 6371±180 | 0.425 | 67  | 5542±111 | 0.280  |
|                 |            | Trend |     |          | 0.425 |     |          | 0.238  |
| <i>FLJ90680</i> | rs760521   | GG    | 81  | 6426±177 |       | 164 | 5576±136 |        |
|                 |            | CG    | 22  | 6836±161 | 0.419 | 61  | 5280±123 | 0.388  |
|                 |            | CC    |     |          |       | 5   | 5620±119 | 0.219  |
|                 |            | CC+CG | 22  | 6836±161 | 0.419 | 66  | 5306±122 | 0.615  |
|                 |            | Trend |     |          | 0.419 |     |          | 0.968  |
| <i>NCF4</i>     | rs5756372  | CC    | 84  | 6388±175 |       | 176 | 5559±134 |        |

|             |            |       |    |          |        |     |          |       |
|-------------|------------|-------|----|----------|--------|-----|----------|-------|
|             |            | CG    | 18 | 7200±153 | 0.080  | 50  | 5254±129 | 0.371 |
|             |            | GG    | 1  | 4700     | 0.002  | 4   | 5900±117 | 0.038 |
|             |            | GG+CG | 19 | 7068±160 | 0.145  | 54  | 5302±128 | 0.675 |
|             |            | Trend |    |          | 0.316  |     |          | 0.926 |
| <i>NCF4</i> | rs9680849  | TT    | 80 | 6516±165 |        | 202 | 5547±132 |       |
|             |            | AT    | 21 | 6643±204 | 0.601  | 23  | 5257±142 | 0.234 |
|             |            | AA    | 2  | 5050±176 | 0.031  | 4   | 4750±926 | 0.049 |
|             |            | AA+AT | 23 | 6504±204 | 1.000  | 27  | 5181±135 | 0.125 |
|             |            | Trend |    |          | 0.632  |     |          | 0.067 |
| <i>NCF4</i> | rs10854693 | GG    | 64 | 6489±164 |        | 111 | 5448±115 |       |
|             |            | AG    | 32 | 6672±193 | 0.854  | 88  | 5558±152 | 0.952 |
|             |            | AA    | 7  | 6014±185 | 0.322  | 29  | 5410±116 | 0.469 |
|             |            | AA+AG | 39 | 6554±191 | 0.799  | 117 | 5521±144 | 0.753 |
|             |            | Trend |    |          | 0.519  |     |          | 0.560 |
| <i>NCF4</i> | rs1883113  | GG    | 93 | 6532±171 |        | 196 | 5466±134 |       |
|             |            | CG    | 10 | 6340±210 | 0.228  | 32  | 5753±125 | 0.420 |
|             |            | CC    |    |          |        | 2   | 4650±919 | 0.360 |
|             |            | CC+CG | 10 | 6340±210 | 0.228  | 34  | 5688±125 | 0.511 |
|             |            | Trend |    |          | 0.228  |     |          | 0.621 |
| <i>NCF4</i> | rs4821542  | CC    | 68 | 6657±167 |        | 181 | 5490±125 |       |
|             |            | CT    | 33 | 6306±185 | 0.440  | 41  | 5563±161 | 0.873 |
|             |            | TT    | 2  | 5050±176 | 0.024  | 6   | 5467±170 | 0.878 |
|             |            | TT+CT | 35 | 6234±184 | 0.252  | 47  | 5551±160 | 0.846 |
|             |            | Trend |    |          | 0.129  |     |          | 0.833 |
| <i>NCF4</i> | rs4821544  | TT    | 70 | 6640±168 |        | 181 | 5475±125 |       |
|             |            | CT    | 31 | 6323±186 | 0.345  | 43  | 5714±162 | 0.308 |
|             |            | CC    | 2  | 5050±176 | 0.022  | 5   | 4740±802 | 0.067 |
|             |            | CC+CT | 33 | 6245±185 | 0.194  | 48  | 5613±158 | 0.440 |
|             |            | Trend |    |          | 0.096  |     |          | 0.660 |
| <i>NCF4</i> | rs741998   | GG    | 93 | 6637±177 |        | 212 | 5457±126 |       |
|             |            | AG    | 10 | 5370±712 | <0.001 | 18  | 5994±189 | 0.115 |
| <i>NCF4</i> | rs746713   | TT    | 46 | 6857±187 |        | 103 | 5357±138 |       |
|             |            | CT    | 46 | 6287±161 | 0.093  | 102 | 5568±131 | 0.282 |
|             |            | CC    | 8  | 5338±105 | 0.004  | 24  | 5863±111 | 0.090 |
|             |            | CC+CT | 54 | 6146±157 | 0.035  | 126 | 5624±128 | 0.169 |
|             |            | Trend |    |          | 0.008  |     |          | 0.093 |
| <i>NCF4</i> | rs760519   | TT    | 46 | 6276±161 |        | 103 | 5515±130 |       |
|             |            | CT    | 42 | 6829±199 | 0.313  | 97  | 5447±130 | 0.469 |
|             |            | CC    | 15 | 6360±127 | 0.876  | 29  | 5655±153 | 0.757 |
|             |            | CC+CT | 57 | 6705±183 | 0.385  | 126 | 5495±135 | 0.651 |
|             |            | Trend |    |          | 0.598  |     |          | 0.984 |
| <i>NCF4</i> | rs729749   | CC    | 46 | 6402±163 |        | 70  | 5603±133 |       |
|             |            | CT    | 38 | 6908±196 | 0.287  | 113 | 5445±128 | 0.384 |
|             |            | TT    | 19 | 5995±137 | 0.372  | 46  | 5498±146 | 0.552 |
|             |            | TT+CT | 57 | 6604±183 | 0.657  | 159 | 5460±133 | 0.365 |
|             |            | Trend |    |          | 0.680  |     |          | 0.487 |
| <i>NCF4</i> | rs2075938  | GG    | 37 | 6051±146 |        | 81  | 5654±137 |       |
|             |            | AG    | 50 | 6948±192 | 0.044  | 109 | 5415±128 | 0.101 |
|             |            | AA    | 16 | 6225±146 | 0.770  | 39  | 5441±138 | 0.560 |

|              |           |       |    |          |       |     |          |        |
|--------------|-----------|-------|----|----------|-------|-----|----------|--------|
|              |           | AA+AG | 66 | 6773±183 | 0.095 | 148 | 5422±130 | 0.135  |
|              |           | Trend |    |          | 0.422 |     |          | 0.350  |
| <i>NCF4</i>  | rs2072711 | GG    | 42 | 6281±165 |       | 100 | 5534±131 |        |
|              |           | AG    | 45 | 6696±194 | 0.431 | 100 | 5484±135 | 0.360  |
|              |           | AA    | 16 | 6613±134 | 0.624 | 29  | 5469±133 | 0.872  |
|              |           | AA+AG | 61 | 6674±179 | 0.429 | 129 | 5481±134 | 0.420  |
|              |           | Trend |    |          | 0.504 |     |          | 0.621  |
| <i>NCF4</i>  | rs3788523 | CC    | 32 | 6103±153 |       | 75  | 5640±140 |        |
|              |           | CT    | 50 | 6872±190 | 0.075 | 110 | 5479±124 | 0.198  |
|              |           | TT    | 19 | 6305±149 | 0.930 | 44  | 5334±140 | 0.247  |
|              |           | TT+CT | 69 | 6716±181 | 0.164 | 154 | 5438±129 | 0.148  |
|              |           | Trend |    |          | 0.674 |     |          | 0.196  |
| <i>NCF4</i>  | rs6000462 | GG    | 90 | 6556±169 |       | 192 | 5565±134 |        |
|              |           | AG    | 13 | 6223±207 | 0.450 | 36  | 5186±124 | 0.149  |
|              |           | AA    |    |          |       | 1   | 4600     | <0.001 |
|              |           | AA+AG | 13 | 6223±207 | 0.450 | 37  | 5170±123 | 0.125  |
|              |           | Trend |    |          | 0.450 |     |          | 0.100  |
| <i>NCF4</i>  | rs5750326 | AA    | 25 | 6088±155 |       | 67  | 5545±141 |        |
|              |           | AC    | 54 | 6750±186 | 0.249 | 107 | 5615±128 | 0.994  |
|              |           | CC    | 24 | 6425±161 | 0.919 | 55  | 5238±130 | 0.290  |
|              |           | CC+AC | 78 | 6650±178 | 0.383 | 162 | 5487±130 | 0.633  |
|              |           | Trend |    |          | 0.918 |     |          | 0.317  |
| <i>NCF4</i>  | rs5756381 | GG    | 52 | 6444±168 |       | 101 | 5516±133 |        |
|              |           | AG    | 37 | 6622±196 | 0.606 | 93  | 5475±130 | 0.358  |
|              |           | AA    | 13 | 6423±141 | 0.927 | 32  | 5403±129 | 0.758  |
|              |           | AA+AG | 50 | 6570±182 | 0.685 | 125 | 5457±129 | 0.394  |
|              |           | Trend |    |          | 0.840 |     |          | 0.555  |
| <i>NFKB1</i> | rs3774934 | GG    | 44 | 6675±181 |       | 89  | 5612±146 |        |
|              |           | AG    | 44 | 6430±177 | 0.396 | 111 | 5468±118 | 0.510  |
|              |           | AA    | 15 | 6287±146 | 0.356 | 29  | 5307±147 | 0.322  |
|              |           | AA+AG | 59 | 6393±169 | 0.317 | 140 | 5435±124 | 0.391  |
|              |           | Trend |    |          | 0.302 |     |          | 0.308  |
| <i>NFKB1</i> | rs1585213 | CC    | 27 | 6233±183 |       | 84  | 5463±129 |        |
|              |           | CT    | 61 | 6746±175 | 0.236 | 107 | 5471±130 | 0.875  |
|              |           | TT    | 15 | 6073±142 | 0.957 | 39  | 5651±149 | 0.547  |
|              |           | TT+CT | 76 | 6613±170 | 0.322 | 146 | 5519±135 | 0.727  |
|              |           | Trend |    |          | 0.707 |     |          | 0.576  |
| <i>NFKB1</i> | rs4647992 | CC    | 92 | 6449±175 |       | 196 | 5487±129 |        |
|              |           | CT    | 11 | 7055±156 | 0.049 | 32  | 5441±150 | 0.811  |
|              |           | TT    |    |          |       | 2   | 7600±113 | <0.001 |
|              |           | TT+CT | 11 | 7055±156 | 0.049 | 34  | 5568±155 | 0.571  |
|              |           | Trend |    |          | 0.049 |     |          | 0.365  |
| <i>NFKB1</i> | rs4648006 | CC    | 90 | 6426±175 |       | 196 | 5487±129 |        |
|              |           | CT    | 13 | 7123±152 | 0.025 | 32  | 5441±150 | 0.811  |
|              |           | TT    |    |          |       | 2   | 7600±113 | <0.001 |
|              |           | TT+CT | 13 | 7123±152 | 0.025 | 34  | 5568±155 | 0.571  |
|              |           | Trend |    |          | 0.025 |     |          | 0.365  |
| <i>NFKB1</i> | rs230510  | TT    | 33 | 6506±172 |       | 58  | 5719±147 |        |
|              |           | AT    | 53 | 6462±167 | 0.698 | 108 | 5409±128 | 0.097  |

|              |            |       |     |          |        |     |          |        |
|--------------|------------|-------|-----|----------|--------|-----|----------|--------|
|              |            | AA    | 17  | 6688±205 | 0.992  | 64  | 5450±127 | 0.285  |
|              |            | AA+AT | 70  | 6517±175 | 0.752  | 172 | 5424±127 | 0.112  |
|              |            | Trend |     |          | 0.923  |     |          | 0.295  |
| <i>NFKB1</i> | rs13117745 | CC    | 89  | 6522±168 |        | 201 | 5442±131 |        |
|              |            | CT    | 14  | 6457±214 | 0.975  | 29  | 5893±138 | 0.100  |
| <i>NFKB1</i> | rs4648022  | CC    | 103 | 6514±174 |        | 227 | 5478±132 |        |
|              |            | CT    |     |          |        | 3   | 7033±140 | <0.001 |
| <i>NFKB1</i> | rs230540   | TT    | 31  | 6581±182 |        | 95  | 5484±126 |        |
|              |            | CT    | 53  | 6572±181 | 0.862  | 111 | 5542±145 | 0.958  |
|              |            | CC    | 19  | 6242±141 | 0.471  | 24  | 5354±103 | 0.543  |
|              |            | CC+CT | 72  | 6485±171 | 0.718  | 135 | 5509±138 | 0.912  |
|              |            | Trend |     |          | 0.512  |     |          | 0.705  |
| <i>NFKB1</i> | rs3755867  | AA    | 31  | 6684±179 |        | 96  | 5470±126 |        |
|              |            | AG    | 53  | 6511±182 | 0.569  | 111 | 5549±144 | 0.827  |
|              |            | GG    | 19  | 6242±141 | 0.341  | 23  | 5378±104 | 0.561  |
|              |            | GG+AG | 72  | 6440±172 | 0.452  | 134 | 5519±138 | 0.967  |
|              |            | Trend |     |          | 0.343  |     |          | 0.791  |
| <i>NFKB1</i> | rs4648090  | GG    | 103 | 6514±174 |        | 225 | 5479±132 |        |
|              |            | AG    |     |          |        | 5   | 6380±133 | 0.104  |
| <i>NFKB1</i> | rs4648110  | TT    | 88  | 6497±167 |        | 201 | 5442±131 |        |
|              |            | AT    | 15  | 6613±215 | 0.655  | 29  | 5893±138 | 0.100  |
| <i>NFKB1</i> | rs4648127  | CC    | 89  | 6470±168 |        | 205 | 5462±132 |        |
|              |            | CT    | 14  | 6793±211 | 0.396  | 23  | 5748±141 | 0.290  |
|              |            | TT    |     |          |        | 1   | 6800     | <0.001 |
|              |            | TT+CT | 14  | 6793±211 | 0.396  | 24  | 5792±140 | 0.193  |
|              |            | Trend |     |          | 0.396  |     |          | 0.118  |
| <i>NFKB1</i> | rs230547   | CC    | 65  | 6502±175 |        | 114 | 5557±144 |        |
|              |            | CT    | 28  | 6511±184 | 0.917  | 98  | 5420±115 | 0.569  |
|              |            | TT    | 8   | 6938±146 | 0.251  | 16  | 5275±120 | 0.872  |
|              |            | TT+CT | 36  | 6606±175 | 0.647  | 114 | 5400±115 | 0.585  |
|              |            | Trend |     |          | 0.420  |     |          | 0.649  |
| <i>NFKB1</i> | rs7674640  | CC    | 24  | 6717±188 |        | 82  | 5427±127 |        |
|              |            | CT    | 51  | 6545±164 | 0.656  | 106 | 5475±137 | 0.833  |
|              |            | TT    | 28  | 6282±181 | 0.420  | 42  | 5700±135 | 0.381  |
|              |            | TT+CT | 79  | 6452±170 | 0.527  | 148 | 5539±136 | 0.829  |
|              |            | Trend |     |          | 0.418  |     |          | 0.472  |
| <i>NOS1</i>  | rs816361   | CC    | 61  | 6482±177 |        | 114 | 5596±131 |        |
|              |            | CG    | 34  | 6544±179 | 0.419  | 101 | 5357±133 | 0.081  |
|              |            | GG    | 8   | 6625±143 | 0.280  | 15  | 5713±145 | 0.262  |
|              |            | GG+CG | 42  | 6560±171 | 0.279  | 116 | 5403±134 | 0.229  |
|              |            | Trend |     |          | 0.220  |     |          | 0.756  |
| <i>NOS1</i>  | rs9658490  | CC    | 87  | 6524±175 |        | 204 | 5470±134 |        |
|              |            | CG    | 15  | 6333±172 | 0.768  | 25  | 5712±127 | 0.625  |
|              |            | GG    | 1   | 8300     | <0.001 | 1   | 6000     | 0.819  |
|              |            | GG+CG | 16  | 6456±173 | 0.965  | 26  | 5723±125 | 0.637  |
|              |            | Trend |     |          | 0.805  |     |          | 0.653  |
| <i>NOS1</i>  | rs1353939  | CC    | 62  | 6466±176 |        | 120 | 5553±129 |        |
|              |            | CT    | 34  | 6524±180 | 0.383  | 97  | 5354±136 | 0.094  |
|              |            | TT    | 7   | 6886±132 | 0.179  | 13  | 6077±130 | 0.006  |



|      |            |       |     |          |       |     |          |       |
|------|------------|-------|-----|----------|-------|-----|----------|-------|
|      |            | TT+CT | 41  | 6585±172 | 0.216 | 110 | 5439±137 | 0.406 |
|      |            | Trend |     |          | 0.145 |     |          | 0.754 |
| NOS1 | rs10850803 | AA    | 99  | 6482±175 |       | 218 | 5455±132 |       |
|      |            | AG    | 2   | 6300±424 | 0.439 | 12  | 6292±124 | 0.012 |
|      |            | GG    | 2   | 8300±0   | 0.056 |     |          |       |
|      |            | GG+AG | 4   | 7300±118 | 0.099 | 12  | 6292±124 | 0.012 |
|      |            | Trend |     |          | 0.054 |     |          | 0.012 |
| NOS1 | rs2291908  | TT    | 30  | 6457±150 |       | 67  | 5487±109 |       |
|      |            | CT    | 57  | 6635±193 | 0.457 | 129 | 5502±140 | 0.841 |
|      |            | CC    | 16  | 6188±142 | 0.826 | 34  | 5512±147 | 0.849 |
|      |            | CC+CT | 73  | 6537±183 | 0.493 | 163 | 5504±141 | 0.815 |
|      |            | Trend |     |          | 0.693 |     |          | 0.825 |
| NOS1 | rs816351   | AA    | 88  | 6600±174 |       | 200 | 5540±137 |       |
|      |            | AG    | 15  | 6007±171 | 0.344 | 29  | 5221±974 | 0.097 |
|      |            | GG    |     |          |       | 1   | 5400     | 0.045 |
|      |            | GG+AG | 15  | 6007±171 | 0.344 | 30  | 5227±958 | 0.111 |
|      |            | Trend |     |          | 0.344 |     |          | 0.142 |
| NOS1 | rs2293054  | GG    | 63  | 6324±163 |       | 140 | 5496±132 |       |
|      |            | AG    | 37  | 6824±189 | 0.166 | 80  | 5548±133 | 0.222 |
|      |            | AA    | 3   | 6667±201 | 0.481 | 9   | 5244±157 | 0.953 |
|      |            | AA+AG | 40  | 6813±187 | 0.139 | 89  | 5517±135 | 0.262 |
|      |            | Trend |     |          | 0.143 |     |          | 0.396 |
| NOS1 | rs2293055  | GG    | 91  | 6686±172 |       | 199 | 5473±131 |       |
|      |            | AG    | 12  | 5208±124 | 0.003 | 29  | 5690±148 | 0.399 |
|      |            | AA    |     |          |       | 2   | 5250±106 | 0.868 |
|      |            | AA+AG | 12  | 5208±124 | 0.003 | 31  | 5661±144 | 0.391 |
|      |            | Trend |     |          | 0.003 |     |          | 0.396 |
| NOS1 | rs6490121  | AA    | 47  | 6330±162 |       | 92  | 5562±144 |       |
|      |            | AG    | 43  | 6674±196 | 0.149 | 106 | 5542±124 | 0.850 |
|      |            | GG    | 13  | 6646±137 | 0.416 | 32  | 5172±126 | 0.109 |
|      |            | GG+AG | 56  | 6668±183 | 0.145 | 138 | 5457±125 | 0.662 |
|      |            | Trend |     |          | 0.196 |     |          | 0.240 |
| NOS1 | rs884847   | GG    | 80  | 6395±167 |       | 179 | 5503±137 |       |
|      |            | AG    | 21  | 7019±200 | 0.121 | 47  | 5519±123 | 0.834 |
|      |            | AA    | 2   | 5950±636 | 0.982 | 4   | 5050±597 | 0.774 |
|      |            | AA+AG | 23  | 6926±193 | 0.129 | 51  | 5482±119 | 0.797 |
|      |            | Trend |     |          | 0.164 |     |          | 0.765 |
| NOS1 | rs9658354  | AA    | 31  | 6710±189 |       | 60  | 5273±113 |       |
|      |            | AT    | 57  | 6477±170 | 0.675 | 117 | 5721±150 | 0.203 |
|      |            | TT    | 15  | 6247±160 | 0.435 | 52  | 5283±102 | 0.591 |
|      |            | TT+AT | 72  | 6429±167 | 0.574 | 169 | 5586±138 | 0.450 |
|      |            | Trend |     |          | 0.446 |     |          | 0.671 |
| NOS1 | rs532967   | GG    | 69  | 6320±162 |       | 166 | 5449±132 |       |
|      |            | AG    | 32  | 6941±197 | 0.119 | 59  | 5690±136 | 0.193 |
|      |            | AA    | 2   | 6350±71  | 0.058 | 4   | 5050±597 | 0.858 |
|      |            | AA+AG | 34  | 6906±191 | 0.099 | 63  | 5649±133 | 0.197 |
|      |            | Trend |     |          | 0.081 |     |          | 0.217 |
| NOS1 | rs11611788 | TT    | 103 | 6514±174 |       | 227 | 5495±133 |       |
|      |            | CT    |     |          |       | 3   | 5800±866 | 0.771 |

|      |            |       |    |          |       |     |          |       |
|------|------------|-------|----|----------|-------|-----|----------|-------|
| NOS1 | rs7298903  | TT    | 60 | 6285±166 |       | 130 | 5437±138 |       |
|      |            | CT    | 38 | 6782±186 | 0.280 | 71  | 5623±127 | 0.191 |
|      |            | CC    | 5  | 7220±146 | 0.173 | 27  | 5552±125 | 0.825 |
|      |            | CC+CT | 43 | 6833±180 | 0.204 | 98  | 5603±126 | 0.261 |
|      |            | Trend |    |          | 0.140 |     |          | 0.456 |
| NOS1 | rs7295972  | GG    | 35 | 6326±149 |       | 80  | 5523±141 |       |
|      |            | AG    | 54 | 6641±193 | 0.128 | 118 | 5529±130 | 0.728 |
|      |            | AA    | 14 | 6493±158 | 0.926 | 29  | 5355±128 | 0.459 |
|      |            | AA+AG | 68 | 6610±185 | 0.169 | 147 | 5495±129 | 0.942 |
|      |            | Trend |    |          | 0.446 |     |          | 0.685 |
| NOS1 | rs11068446 | CC    | 50 | 6550±166 |       | 105 | 5390±137 |       |
|      |            | CT    | 48 | 6402±185 | 0.405 | 96  | 5625±131 | 0.111 |
|      |            | TT    | 5  | 7220±146 | 0.417 | 28  | 5514±124 | 0.753 |
|      |            | TT+CT | 53 | 6479±182 | 0.531 | 124 | 5600±129 | 0.153 |
|      |            | Trend |    |          | 0.853 |     |          | 0.337 |
| NOS1 | rs816293   | CC    | 59 | 6592±185 |       | 130 | 5499±135 |       |
|      |            | CG    | 38 | 6250±150 | 0.245 | 86  | 5519±133 | 0.694 |
|      |            | GG    | 6  | 7417±190 | 0.091 | 13  | 5454±110 | 0.529 |
|      |            | GG+CG | 44 | 6409±159 | 0.610 | 99  | 5510±130 | 0.608 |
|      |            | Trend |    |          | 0.748 |     |          | 0.525 |
| NOS1 | rs12578547 | TT    | 44 | 6400±168 |       | 97  | 5400±132 |       |
|      |            | CT    | 42 | 6612±198 | 0.947 | 105 | 5569±138 | 0.555 |
|      |            | CC    | 17 | 6565±126 | 0.861 | 28  | 5579±116 | 0.689 |
|      |            | CC+CT | 59 | 6598±179 | 0.908 | 133 | 5571±133 | 0.534 |
|      |            | Trend |    |          | 0.871 |     |          | 0.569 |
| NOS1 | rs9658282  | TT    | 47 | 6770±173 |       | 105 | 5543±128 |       |
|      |            | AT    | 42 | 6267±180 | 0.149 | 107 | 5556±136 | 0.882 |
|      |            | AA    | 14 | 6393±158 | 0.541 | 17  | 4935±133 | 0.038 |
|      |            | AA+AT | 56 | 6298±173 | 0.138 | 124 | 5471±137 | 0.471 |
|      |            | Trend |    |          | 0.251 |     |          | 0.143 |
| NOS1 | rs3782218  | CC    | 92 | 6511±171 |       | 215 | 5464±129 |       |
|      |            | CT    | 11 | 6536±200 | 0.579 | 15  | 6000±174 | 0.145 |
| NOS1 | rs545654   | CC    | 50 | 6448±172 |       | 120 | 5521±145 |       |
|      |            | CT    | 45 | 6464±173 | 0.892 | 87  | 5518±124 | 0.811 |
|      |            | TT    | 8  | 7200±195 | 0.225 | 22  | 5355±935 | 0.664 |
|      |            | TT+CT | 53 | 6575±177 | 0.791 | 109 | 5485±118 | 0.745 |
|      |            | Trend |    |          | 0.454 |     |          | 0.681 |
| NOS1 | rs12424669 | CC    | 88 | 6472±169 |       | 191 | 5499±135 |       |
|      |            | CT    | 15 | 6760±205 | 0.773 | 36  | 5558±122 | 0.482 |
|      |            | TT    |    |          |       | 2   | 4950±162 | 0.599 |
|      |            | TT+CT | 15 | 6760±205 | 0.773 | 38  | 5526±122 | 0.582 |
|      |            | Trend |    |          | 0.773 |     |          | 0.729 |
| NOS1 | rs1552227  | CC    | 54 | 6628±161 |       | 103 | 5474±134 |       |
|      |            | CT    | 41 | 6427±197 | 0.182 | 98  | 5463±130 | 0.858 |
|      |            | TT    | 8  | 6188±138 | 0.762 | 28  | 5732±142 | 0.456 |
|      |            | TT+CT | 49 | 6388±188 | 0.197 | 126 | 5523±133 | 0.657 |
|      |            | Trend |    |          | 0.288 |     |          | 0.500 |
| NOS1 | rs483589   | GG    | 54 | 6748±182 |       | 136 | 5524±144 |       |
|      |            | AG    | 45 | 6264±169 | 0.361 | 77  | 5492±118 | 0.644 |

|       |            |       |    |          |        |     |          |       |
|-------|------------|-------|----|----------|--------|-----|----------|-------|
|       |            | AA    | 4  | 6150±332 | 0.826  | 16  | 5394±104 | 0.721 |
|       |            | AA+AG | 49 | 6255±162 | 0.372  | 93  | 5475±115 | 0.760 |
|       |            | Trend |    |          | 0.407  |     |          | 0.945 |
| NOS1  | rs1123425  | GG    | 49 | 6708±182 |        | 82  | 5478±145 |       |
|       |            | AG    | 29 | 6283±174 | 0.528  | 102 | 5479±122 | 0.884 |
|       |            | AA    | 17 | 5788±118 | 0.137  | 40  | 5423±114 | 0.912 |
|       |            | AA+AG | 46 | 6100±156 | 0.268  | 142 | 5463±120 | 0.943 |
|       |            | Trend |    |          | 0.154  |     |          | 0.961 |
| NOS1  | rs3782221  | AA    | 31 | 6387±147 |        | 59  | 5337±127 |       |
|       |            | AG    | 51 | 6857±197 | 0.211  | 116 | 5606±139 | 0.300 |
|       |            | GG    | 21 | 5867±128 | 0.474  | 54  | 5467±125 | 0.473 |
|       |            | GG+AG | 72 | 6568±184 | 0.469  | 170 | 5562±135 | 0.302 |
|       |            | Trend |    |          | 0.710  |     |          | 0.470 |
| NOS1  | rs11068458 | AA    | 88 | 6593±174 |        | 185 | 5505±131 |       |
|       |            | AG    | 14 | 6193±165 | 0.329  | 41  | 5490±146 | 0.959 |
|       |            | GG    | 1  | 4000     | <0.001 | 4   | 5300±105 | 0.988 |
|       |            | GG+AG | 15 | 6047±169 | 0.191  | 45  | 5473±142 | 0.962 |
|       |            | Trend |    |          | 0.103  |     |          | 0.967 |
| NOS1  | rs1879417  | CC    | 22 | 6395±181 |        | 65  | 5652±135 |       |
|       |            | CT    | 44 | 6605±178 | 0.362  | 120 | 5488±130 | 0.486 |
|       |            | TT    | 37 | 6476±168 | 0.512  | 44  | 5323±137 | 0.084 |
|       |            | TT+CT | 81 | 6546±173 | 0.392  | 164 | 5443±132 | 0.245 |
|       |            | Trend |    |          | 0.579  |     |          | 0.091 |
| NOS1  | rs4767535  | CC    | 47 | 6606±173 |        | 58  | 5319±132 |       |
|       |            | CT    | 37 | 6154±167 | 0.327  | 128 | 5560±136 | 0.183 |
|       |            | TT    | 19 | 6984±181 | 0.704  | 43  | 5551±126 | 0.281 |
|       |            | TT+CT | 56 | 6436±175 | 0.601  | 171 | 5558±133 | 0.170 |
|       |            | Trend |    |          | 0.962  |     |          | 0.250 |
| NOS2A | rs9901734  | CC    | 53 | 6592±165 |        | 118 | 5485±135 |       |
|       |            | CG    | 42 | 6367±189 | 0.502  | 91  | 5554±129 | 0.957 |
|       |            | GG    | 8  | 6763±161 | 0.288  | 21  | 5338±141 | 0.996 |
|       |            | GG+CG | 50 | 6430±184 | 0.780  | 112 | 5513±131 | 0.962 |
|       |            | Trend |    |          | 0.800  |     |          | 0.974 |
| NOS2A | rs8081248  | GG    | 55 | 6505±174 |        | 129 | 5381±128 |       |
|       |            | AG    | 39 | 6462±181 | 0.726  | 82  | 5622±138 | 0.228 |
|       |            | AA    | 9  | 6789±157 | 0.609  | 19  | 5763±141 | 0.258 |
|       |            | AA+AG | 48 | 6523±176 | 0.856  | 101 | 5649±138 | 0.150 |
|       |            | Trend |    |          | 0.924  |     |          | 0.142 |
| NOS2A | rs2255929  | AA    | 45 | 6496±183 |        | 102 | 5307±125 |       |
|       |            | AT    | 46 | 6554±185 | 0.999  | 92  | 5577±122 | 0.415 |
|       |            | TT    | 12 | 6425±745 | 0.870  | 36  | 5842±168 | 0.121 |
|       |            | TT+AT | 58 | 6528±168 | 0.971  | 128 | 5652±137 | 0.195 |
|       |            | Trend |    |          | 0.922  |     |          | 0.118 |
| NOS2A | rs2297516  | CC    | 34 | 6368±168 |        | 88  | 5405±130 |       |
|       |            | AC    | 53 | 6589±191 | 0.964  | 101 | 5634±140 | 0.150 |
|       |            | AA    | 16 | 6575±124 | 0.716  | 41  | 5368±118 | 0.824 |
|       |            | AA+AC | 69 | 6586±177 | 0.889  | 142 | 5557±134 | 0.237 |
|       |            | Trend |    |          | 0.762  |     |          | 0.565 |
| NOS2A | rs9797244  | TT    | 76 | 6396±171 |        | 181 | 5585±141 |       |

|       |            |       |     |          |       |     |          |       |
|-------|------------|-------|-----|----------|-------|-----|----------|-------|
|       |            | CT    | 27  | 6844±179 | 0.332 | 44  | 5255±917 | 0.358 |
|       |            | CC    |     |          |       | 5   | 4520±807 | 0.106 |
|       |            | CC+CT | 27  | 6844±179 | 0.332 | 49  | 5180±926 | 0.213 |
|       |            | Trend |     |          | 0.332 |     |          | 0.128 |
| NOS2A | rs2248814  | GG    | 54  | 6446±186 |       | 126 | 5363±127 |       |
|       |            | AG    | 40  | 6670±175 | 0.661 | 84  | 5674±137 | 0.112 |
|       |            | AA    | 9   | 6222±705 | 0.650 | 20  | 5615±145 | 0.550 |
|       |            | AA+AG | 49  | 6588±161 | 0.764 | 104 | 5663±138 | 0.120 |
|       |            | Trend |     |          | 0.958 |     |          | 0.210 |
| NOS2A | rs12944039 | GG    | 53  | 6423±148 |       | 119 | 5487±133 |       |
|       |            | AG    | 43  | 6665±204 | 0.539 | 88  | 5545±132 | 0.708 |
|       |            | AA    | 7   | 6271±165 | 0.908 | 22  | 5459±139 | 0.792 |
|       |            | AA+AG | 50  | 6610±198 | 0.557 | 110 | 5528±133 | 0.847 |
|       |            | Trend |     |          | 0.634 |     |          | 0.977 |
| NOS2A | rs4795067  | AA    | 61  | 6454±179 |       | 138 | 5499±134 |       |
|       |            | AG    | 40  | 6673±167 | 0.527 | 82  | 5437±111 | 0.814 |
|       |            | GG    | 2   | 5150±162 | 0.201 | 10  | 6000±240 | 0.654 |
|       |            | GG+AG | 42  | 6600±168 | 0.649 | 92  | 5498±131 | 0.718 |
|       |            | Trend |     |          | 0.841 |     |          | 0.646 |
| NOS2A | rs3729508  | CC    | 29  | 6590±205 |       | 68  | 5640±144 |       |
|       |            | CT    | 52  | 6477±173 | 0.489 | 108 | 5469±131 | 0.728 |
|       |            | TT    | 22  | 6500±134 | 0.668 | 54  | 5380±122 | 0.311 |
|       |            | TT+CT | 74  | 6484±161 | 0.500 | 162 | 5440±128 | 0.492 |
|       |            | Trend |     |          | 0.640 |     |          | 0.319 |
| NOS2A | rs944725   | CC    | 64  | 6614±157 |       | 111 | 5425±121 |       |
|       |            | CT    | 29  | 6272±199 | 0.462 | 93  | 5561±144 | 0.558 |
|       |            | TT    | 9   | 6222±188 | 0.958 | 22  | 5523±112 | 0.383 |
|       |            | TT+CT | 38  | 6261±194 | 0.545 | 115 | 5554±138 | 0.427 |
|       |            | Trend |     |          | 0.693 |     |          | 0.355 |
| NOS2A | rs3794763  | GG    | 58  | 6645±144 |       | 122 | 5445±131 |       |
|       |            | AG    | 35  | 6300±214 | 0.523 | 84  | 5620±140 | 0.704 |
|       |            | AA    | 10  | 6500±187 | 0.931 | 23  | 5326±120 | 0.937 |
|       |            | AA+AG | 45  | 6344±207 | 0.605 | 107 | 5557±136 | 0.730 |
|       |            | Trend |     |          | 0.786 |     |          | 0.801 |
| NOS2A | rs8072199  | CC    | 87  | 6575±173 |       | 203 | 5481±130 |       |
|       |            | CT    | 15  | 6327±174 | 0.699 | 26  | 5650±156 | 0.254 |
|       |            | TT    |     |          |       | 1   | 5200     | 0.067 |
|       |            | TT+CT | 15  | 6327±174 | 0.699 | 27  | 5633±153 | 0.239 |
|       |            | Trend |     |          | 0.699 |     |          | 0.225 |
| NOS2A | rs2779248  | TT    | 71  | 6420±162 |       | 165 | 5453±131 |       |
|       |            | CT    | 28  | 6904±202 | 0.281 | 53  | 5655±134 | 0.354 |
|       |            | CC    | 4   | 5450±127 | 0.378 | 12  | 5442±149 | 0.713 |
|       |            | CC+CT | 32  | 6722±199 | 0.422 | 65  | 5615±136 | 0.487 |
|       |            | Trend |     |          | 0.680 |     |          | 0.705 |
| NOS2A | rs11080358 | GG    | 100 | 6549±175 |       | 221 | 5479±132 |       |
|       |            | AG    | 3   | 5333±902 | 0.205 | 9   | 5978±135 | 0.574 |
| NOS2A | rs2779252  | GG    | 52  | 6373±191 |       | 116 | 5472±140 |       |
|       |            | GT    | 45  | 6767±161 | 0.450 | 95  | 5460±122 | 0.773 |
|       |            | TT    | 6   | 5833±450 | 0.054 | 19  | 5858±140 | 0.271 |

|        |            |       |    |          |        |     |          |        |
|--------|------------|-------|----|----------|--------|-----|----------|--------|
|        |            | TT+GT | 51 | 6657±155 | 0.626  | 114 | 5526±125 | 0.533  |
|        |            | Trend |    |          |        |     |          | 0.343  |
| NOS2A  | rs12150211 | GG    | 57 | 6584±150 |        | 112 | 5512±130 |        |
|        |            | AG    | 38 | 6400±199 | 0.823  | 96  | 5428±136 | 0.717  |
|        |            | AA    | 6  | 6350±232 | 0.980  | 21  | 5810±132 | 0.364  |
|        |            | AA+AG | 44 | 6393±201 | 0.836  | 117 | 5497±135 | 0.968  |
|        |            | Trend |    |          |        |     |          | 0.667  |
| NOS2A  | rs2531863  | GG    | 55 | 6398±177 |        | 114 | 5577±135 |        |
|        |            | AG    | 44 | 6655±169 | 0.262  | 93  | 5391±128 | 0.211  |
|        |            | AA    | 4  | 6550±215 | 0.988  | 23  | 5543±144 | 0.592  |
|        |            | AA+AG | 48 | 6646±170 | 0.312  | 116 | 5422±131 | 0.207  |
|        |            | Trend |    |          |        |     |          | 0.293  |
| NOS3   | rs4496877  | GG    | 84 | 6612±178 |        | 196 | 5547±132 |        |
|        |            | GT    | 18 | 6061±155 | 0.077  | 33  | 5230±139 | 0.035  |
|        |            | TT    | 1  | 6400     | 0.816  | 1   | 4800     | <0.001 |
|        |            | TT+GT | 19 | 6079±150 | 0.080  | 34  | 5218±137 | 0.029  |
|        |            | Trend |    |          |        |     |          | 0.023  |
| NOS3   | rs2373961  | CC    | 79 | 6658±172 |        | 173 | 5448±128 |        |
|        |            | CT    | 19 | 5847±172 | 0.064  | 51  | 5708±150 | 0.313  |
|        |            | TT    | 5  | 6760±182 | 0.515  | 5   | 5360±126 | 0.857  |
|        |            | TT+CT | 24 | 6038±174 | 0.172  | 56  | 5677±147 | 0.367  |
|        |            | Trend |    |          |        |     |          | 0.491  |
| NOS3   | rs12703107 | TT    | 63 | 6821±176 |        | 144 | 5498±125 |        |
|        |            | GT    | 31 | 5865±157 | 0.002  | 75  | 5531±149 | 0.806  |
|        |            | GG    | 9  | 6600±169 | 0.985  | 10  | 5390±121 | 0.265  |
|        |            | GG+GT | 40 | 6030±161 | 0.013  | 85  | 5514±145 | 0.647  |
|        |            | Trend |    |          |        |     |          | 0.466  |
| NOS3   | rs1799983  | GG    | 80 | 6441±173 |        | 185 | 5517±134 |        |
|        |            | GT    | 22 | 6927±161 | 0.134  | 41  | 5424±131 | 0.533  |
|        |            | TT    | 1  | 3200     | <0.001 | 3   | 5800±124 | 0.232  |
|        |            | TT+GT | 23 | 6765±176 | 0.352  | 44  | 5450±130 | 0.683  |
|        |            | Trend |    |          |        |     |          | 0.874  |
| NOS3   | rs3918227  | CC    | 84 | 6508±177 |        | 209 | 5498±135 |        |
|        |            | AC    | 18 | 6722±148 | 0.495  | 20  | 5420±105 | 0.819  |
|        |            | AA    | 1  | 3200     | <0.001 | 1   | 7200     | <0.001 |
|        |            | AA+AC | 19 | 6537±165 | 0.918  | 21  | 5505±109 | 0.897  |
|        |            | Trend |    |          |        |     |          | 0.663  |
| NOS3   | rs743507   | TT    | 67 | 6315±159 |        | 115 | 5543±133 |        |
|        |            | CT    | 32 | 6825±187 | 0.175  | 94  | 5459±135 | 0.273  |
|        |            | CC    | 4  | 7350±288 | 0.510  | 20  | 5495±125 | 0.565  |
|        |            | CC+CT | 36 | 6883±195 | 0.142  | 114 | 5465±133 | 0.260  |
|        |            | Trend |    |          |        |     |          | 0.321  |
| ATG9B  | rs2373929  | GG    | 31 | 6632±206 |        | 87  | 5589±126 |        |
|        |            | AG    | 50 | 6540±170 | 0.894  | 106 | 5454±144 | 0.682  |
|        |            | AA    | 22 | 6286±133 | 0.797  | 36  | 5447±116 | 0.898  |
|        |            | AA+AG | 72 | 6463±159 | 0.845  | 142 | 5452±137 | 0.772  |
|        |            | Trend |    |          |        |     |          | 0.975  |
| PFKFB2 | rs17258746 | TT    | 94 | 6566±180 |        | 202 | 5516±133 |        |
|        |            | AT    | 9  | 5967±725 | 0.318  | 27  | 5415±131 | 0.480  |

|               |            |       |     |          |        |     |          |        |
|---------------|------------|-------|-----|----------|--------|-----|----------|--------|
| <i>PFKFB2</i> | rs3748671  | TT    | 76  | 6739±170 |        | 188 | 5472±136 |        |
|               |            | CT    | 27  | 5878±171 | 0.101  | 39  | 5695±118 | 0.614  |
|               |            | CC    |     |          |        | 3   | 4633±551 | 0.176  |
|               |            | CC+CT | 27  | 5878±171 | 0.101  | 42  | 5619±118 | 0.782  |
|               |            | Trend |     |          | 0.101  |     |          | 0.971  |
| <i>PFKFB2</i> | rs6673422  | AA    | 81  | 6619±178 |        | 187 | 5507±136 |        |
|               |            | AG    | 21  | 6157±156 | 0.347  | 42  | 5498±118 | 0.805  |
|               |            | GG    | 1   | 5500     | 0.011  | 1   | 3900     | <0.001 |
|               |            | GG+AG | 22  | 6127±153 | 0.311  | 43  | 5460±119 | 0.666  |
|               |            | Trend |     |          | 0.267  |     |          | 0.522  |
| <i>PTGDR</i>  | rs803022   | TT    | 102 | 6526±174 |        | 226 | 5508±133 |        |
|               |            | AT    | 1   | 5200     | 0.005  | 3   | 5200±866 | 0.023  |
| <i>PTGDR</i>  | rs2040049  | AA    | 79  | 6700±171 |        | 140 | 5554±124 |        |
|               |            | AT    | 22  | 5800±174 | 0.004  | 78  | 5497±152 | 0.562  |
|               |            | TT    | 2   | 7000±113 | 0.170  | 11  | 4945±695 | 0.016  |
|               |            | TT+AT | 24  | 5900±172 | 0.012  | 89  | 5429±145 | 0.379  |
|               |            | Trend |     |          | 0.075  |     |          | 0.177  |
| <i>PTGDR</i>  | rs803014   | GG    | 100 | 6552±172 |        | 201 | 5488±126 |        |
|               |            | AG    | 3   | 5233±231 | 0.261  | 29  | 5576±175 | 0.767  |
| <i>PTGDR</i>  | rs4898758  | AA    | 100 | 6538±173 |        | 203 | 5484±125 |        |
|               |            | AG    | 3   | 5700±226 | 0.608  | 26  | 5573±184 | 0.959  |
|               |            | GG    |     |          |        | 1   | 6600     | <0.001 |
|               |            | GG+AG | 3   | 5700±226 | 0.608  | 27  | 5611±181 | 0.890  |
|               |            | Trend |     |          | 0.608  |     |          | 0.739  |
| <i>PTGDR</i>  | rs1254609  | AA    | 58  | 6884±163 |        | 107 | 5475±116 |        |
|               |            | AG    | 39  | 6118±183 | 0.016  | 105 | 5570±149 | 0.969  |
|               |            | GG    | 6   | 5500±138 | 0.039  | 17  | 5276±129 | 0.626  |
|               |            | GG+AG | 45  | 6036±177 | 0.006  | 122 | 5530±146 | 0.924  |
|               |            | Trend |     |          | 0.004  |     |          | 0.766  |
| <i>PTGDR</i>  | rs10498445 | CC    | 83  | 6653±174 |        | 195 | 5442±128 |        |
|               |            | CG    | 19  | 6021±166 | 0.217  | 33  | 5848±159 | 0.139  |
|               |            | GG    | 1   | 4300     | <0.001 | 1   | 4600     | <0.001 |
|               |            | GG+CG | 20  | 5935±166 | 0.141  | 34  | 5812±158 | 0.167  |
|               |            | Trend |     |          | 0.075  |     |          | 0.228  |
| <i>PTGDR</i>  | rs708486   | AA    | 77  | 6645±170 |        | 162 | 5544±135 |        |
|               |            | AG    | 24  | 6133±190 | 0.096  | 59  | 5492±132 | 0.404  |
|               |            | GG    | 2   | 6000±283 | 0.651  | 8   | 4775±636 | 0.028  |
|               |            | GG+AG | 26  | 6123±182 | 0.096  | 67  | 5406±127 | 0.239  |
|               |            | Trend |     |          | 0.116  |     |          | 0.117  |
| <i>RAC1</i>   | rs6967221  | GG    | 91  | 6620±172 |        | 192 | 5421±131 |        |
|               |            | AG    | 11  | 5782±181 | 0.197  | 36  | 5853±130 | 0.068  |
|               |            | AA    | 1   | 4900     | <0.001 | 2   | 6600±254 | 0.087  |
|               |            | AA+AG | 12  | 5708±174 | 0.083  | 38  | 5892±134 | 0.035  |
|               |            | Trend |     |          | 0.028  |     |          | 0.021  |
| <i>RAC1</i>   | rs702484   | GG    | 49  | 6555±175 |        | 121 | 5331±133 |        |
|               |            | CG    | 35  | 6611±171 | 0.997  | 87  | 5603±119 | 0.275  |
|               |            | CC    | 18  | 6283±186 | 0.731  | 20  | 5835±151 | 0.114  |
|               |            | CC+CG | 53  | 6500±175 | 0.871  | 107 | 5647±125 | 0.132  |
|               |            | Trend |     |          | 0.768  |     |          | 0.081  |

|      |           |       |    |          |       |     |          |       |
|------|-----------|-------|----|----------|-------|-----|----------|-------|
| RAC1 | rs6463554 | GG    | 99 | 6532±176 |       | 225 | 5516±132 |       |
|      |           | CG    | 4  | 6050±998 | 0.812 | 5   | 4700±130 | 0.238 |
| RAC1 | rs836551  | CC    | 77 | 6573±168 |       | 157 | 5479±139 |       |
|      |           | CG    | 22 | 6536±202 | 0.757 | 67  | 5500±116 | 0.800 |
|      |           | GG    | 4  | 5250±557 | 0.037 | 6   | 6000±140 | 0.307 |
|      |           | GG+CG | 26 | 6338±192 | 0.940 | 73  | 5541±118 | 0.614 |
|      |           | Trend |    |          | 0.582 |     |          | 0.454 |
| RAC1 | rs4720672 | TT    | 78 | 6433±177 |       | 173 | 5502±136 |       |
|      |           | CT    | 14 | 7000±160 | 0.332 | 51  | 5569±122 | 0.834 |
|      |           | CC    | 11 | 6464±174 | 0.608 | 6   | 4817±100 | 0.204 |
|      |           | CC+CT | 25 | 6764±165 | 0.788 | 57  | 5489±122 | 0.590 |
|      |           | Trend |    |          | 0.909 |     |          | 0.407 |
| RAC1 | rs836554  | TT    | 49 | 6267±170 |       | 109 | 5468±145 |       |
|      |           | CT    | 44 | 6986±177 | 0.103 | 98  | 5505±122 | 0.852 |
|      |           | CC    | 9  | 5456±116 | 0.201 | 21  | 5671±117 | 0.934 |
|      |           | CC+CT | 53 | 6726±177 | 0.270 | 119 | 5534±121 | 0.856 |
|      |           | Trend |    |          | 0.833 |     |          | 0.878 |
| RAC2 | rs4821609 | GG    | 75 | 6556±185 |       | 186 | 5435±122 |       |
|      |           | AG    | 25 | 6460±146 | 0.613 | 42  | 5817±173 | 0.124 |
|      |           | AA    | 3  | 5900±872 | 0.081 | 2   | 4700±0   | 0.175 |
|      |           | AA+AG | 28 | 6400±141 | 0.477 | 44  | 5766±171 | 0.145 |
|      |           | Trend |    |          | 0.338 |     |          | 0.189 |
| RAC2 | rs6572    | GG    | 37 | 6246±172 |       | 80  | 5433±121 |       |
|      |           | CG    | 45 | 6718±185 | 0.467 | 102 | 5613±144 | 0.398 |
|      |           | CC    | 21 | 6548±151 | 0.444 | 48  | 5367±126 | 0.773 |
|      |           | CC+CG | 66 | 6664±174 | 0.385 | 150 | 5534±138 | 0.618 |
|      |           | Trend |    |          | 0.409 |     |          | 0.935 |
| RAC2 | rs8135343 | GG    | 48 | 6460±162 |       | 106 | 5681±149 |       |
|      |           | AG    | 42 | 6526±185 | 0.933 | 84  | 5474±108 | 0.533 |
|      |           | AA    | 13 | 6669±188 | 0.756 | 39  | 5087±126 | 0.029 |
|      |           | AA+AG | 55 | 6560±184 | 0.845 | 123 | 5351±115 | 0.146 |
|      |           | Trend |    |          | 0.776 |     |          | 0.043 |
| RAC2 | rs9607432 | TT    | 66 | 6455±168 |       | 125 | 5554±141 |       |
|      |           | CT    | 29 | 6707±192 | 0.660 | 85  | 5447±116 | 0.574 |
|      |           | CC    | 8  | 6300±166 | 0.962 | 20  | 5370±152 | 0.603 |
|      |           | CC+CT | 37 | 6619±185 | 0.689 | 105 | 5432±123 | 0.494 |
|      |           | Trend |    |          | 0.762 |     |          | 0.501 |
| RAC2 | rs1476002 | CC    | 78 | 6519±179 |       | 186 | 5453±125 |       |
|      |           | CT    | 23 | 6522±166 | 0.786 | 40  | 5690±160 | 0.141 |
|      |           | TT    | 2  | 6200±990 | 0.250 | 4   | 5700±193 | 0.748 |
|      |           | TT+CT | 25 | 6496±160 | 0.690 | 44  | 5691±161 | 0.140 |
|      |           | Trend |    |          | 0.581 |     |          | 0.169 |
| RAC2 | rs2239774 | GG    | 64 | 6477±169 |       | 130 | 5574±141 |       |
|      |           | CG    | 31 | 6635±189 | 0.734 | 87  | 5422±119 | 0.526 |
|      |           | CC    | 8  | 6338±162 | 0.878 | 13  | 5262±133 | 0.666 |
|      |           | CC+CG | 39 | 6574±182 | 0.725 | 100 | 5401±120 | 0.480 |
|      |           | Trend |    |          | 0.753 |     |          | 0.497 |
| RAC2 | rs2239775 | CC    | 77 | 6600±178 |       | 182 | 5477±126 |       |
|      |           | AC    | 24 | 6063±141 | 0.095 | 45  | 5527±155 | 0.583 |

|                |            |       |     |          |        |     |          |       |
|----------------|------------|-------|-----|----------|--------|-----|----------|-------|
|                |            | AA    | 2   | 8600±240 | 0.160  | 3   | 6367±223 | 0.153 |
|                |            | AA+AC | 26  | 6258±159 | 0.273  | 48  | 5579±158 | 0.412 |
|                |            | Trend |     |          | 0.661  |     |          | 0.281 |
| <i>RAC2</i>    | rs2239773  | GG    | 84  | 6517±174 |        | 191 | 5613±137 |       |
|                |            | AG    | 17  | 6794±161 | 0.346  | 39  | 4941±888 | 0.002 |
|                |            | AA    | 2   | 4000±0   | <0.001 |     |          |       |
|                |            | AA+AG | 19  | 6500±176 | 0.859  | 39  | 4941±888 | 0.002 |
|                |            | Trend |     |          | 0.666  |     |          | 0.002 |
| <i>RAC2</i>    | rs2213430  | CC    | 31  | 6477±167 |        | 70  | 5343±123 |       |
|                |            | CT    | 46  | 6467±176 | 0.820  | 95  | 5613±143 | 0.277 |
|                |            | TT    | 26  | 6638±182 | 0.588  | 64  | 5519±128 | 0.768 |
|                |            | TT+CT | 72  | 6529±177 | 0.685  | 159 | 5575±137 | 0.379 |
|                |            | Trend |     |          | 0.591  |     |          | 0.744 |
| <i>RAC2</i>    | rs739043   | AA    | 38  | 6437±172 |        | 90  | 5644±150 |       |
|                |            | AG    | 48  | 6531±176 | 0.379  | 98  | 5495±122 | 0.967 |
|                |            | GG    | 17  | 6635±178 | 0.508  | 41  | 5217±113 | 0.109 |
|                |            | GG+AG | 65  | 6558±176 | 0.353  | 139 | 5413±120 | 0.509 |
|                |            | Trend |     |          | 0.420  |     |          | 0.169 |
| <i>RAC2</i>    | rs12484031 | AA    | 84  | 6489±169 |        | 187 | 5612±137 |       |
|                |            | AG    | 16  | 6831±187 | 0.462  | 42  | 4981±102 | 0.003 |
|                |            | GG    | 3   | 5500±259 | 0.504  | 1   | 6000     | 0.719 |
|                |            | GG+AG | 19  | 6621±198 | 0.764  | 43  | 5005±102 | 0.003 |
|                |            | Trend |     |          | 0.971  |     |          | 0.004 |
| <i>SCGB1A1</i> | rs3889277  | GG    | 101 | 6554±173 |        | 226 | 5488±133 |       |
|                |            | CG    | 2   | 4450±636 | 0.004  | 4   | 6100±902 | 0.441 |
| <i>SCGB1A1</i> | rs2509973  | CC    | 25  | 6096±149 |        | 74  | 5232±130 |       |
|                |            | AC    | 54  | 6739±166 | 0.062  | 113 | 5526±123 | 0.352 |
|                |            | AA    | 24  | 6442±209 | 0.761  | 43  | 5886±152 | 0.032 |
|                |            | AA+AC | 78  | 6647±180 | 0.135  | 156 | 5625±132 | 0.130 |
|                |            | Trend |     |          | 0.710  |     |          | 0.038 |
| <i>SCGB1A1</i> | rs10897270 | CC    | 25  | 6304±166 |        | 65  | 5434±118 |       |
|                |            | CT    | 49  | 6722±184 | 0.254  | 113 | 5493±147 | 0.981 |
|                |            | TT    | 29  | 6341±164 | 0.652  | 52  | 5592±116 | 0.494 |
|                |            | TT+CT | 78  | 6581±177 | 0.319  | 165 | 5524±138 | 0.800 |
|                |            | Trend |     |          | 0.672  |     |          | 0.519 |
| <i>SCGB1A1</i> | rs3741240  | GG    | 35  | 6697±191 |        | 90  | 5730±137 |       |
|                |            | AG    | 56  | 6373±158 | 0.565  | 103 | 5318±128 | 0.080 |
|                |            | AA    | 12  | 6633±197 | 0.834  | 37  | 5438±129 | 0.370 |
|                |            | AA+AG | 68  | 6419±165 | 0.582  | 140 | 5350±128 | 0.087 |
|                |            | Trend |     |          | 0.696  |     |          | 0.200 |
| <i>SCGB1A1</i> | rs2509963  | CC    | 31  | 6439±171 |        | 75  | 5469±134 |       |
|                |            | CT    | 57  | 6463±170 | 0.796  | 112 | 5452±127 | 0.994 |
|                |            | TT    | 14  | 7021±199 | 0.335  | 42  | 5705±147 | 0.502 |
|                |            | TT+CT | 71  | 6573±176 | 0.600  | 154 | 5521±133 | 0.808 |
|                |            | Trend |     |          | 0.390  |     |          | 0.565 |
| <i>SELE</i>    | rs4656699  | CC    | 56  | 6493±153 |        | 116 | 5435±131 |       |
|                |            | CT    | 36  | 6664±198 | 0.626  | 95  | 5594±143 | 0.530 |
|                |            | TT    | 10  | 6160±211 | 0.301  | 18  | 5472±822 | 0.744 |
|                |            | TT+CT | 46  | 6554±199 | 0.954  | 113 | 5574±135 | 0.512 |



|             |            |       |     |          |       |     |          |       |
|-------------|------------|-------|-----|----------|-------|-----|----------|-------|
|             |            | Trend |     |          | 0.645 |     |          | 0.530 |
| <i>SELE</i> | rs4656701  | GG    | 46  | 6628±151 |       | 84  | 5396±132 |       |
|             |            | CG    | 41  | 6380±188 | 0.618 | 110 | 5646±141 | 0.390 |
|             |            | CC    | 16  | 6525±204 | 0.766 | 34  | 5300±104 | 0.867 |
|             |            | CC+CG | 57  | 6421±191 | 0.604 | 144 | 5565±134 | 0.520 |
|             |            | Trend |     |          | 0.674 |     |          | 0.859 |
| <i>SELE</i> | rs1076637  | CC    | 37  | 6241±164 |       | 57  | 5482±142 |       |
|             |            | CT    | 45  | 6776±169 | 0.044 | 111 | 5507±138 | 0.826 |
|             |            | TT    | 21  | 6433±199 | 0.699 | 60  | 5513±116 | 0.925 |
|             |            | TT+CT | 66  | 6667±178 | 0.106 | 171 | 5509±130 | 0.907 |
|             |            | Trend |     |          | 0.473 |     |          | 0.927 |
| <i>SELE</i> | rs2076059  | CC    | 79  | 6522±182 |       | 158 | 5461±123 |       |
|             |            | CT    | 21  | 6438±145 | 0.566 | 66  | 5548±152 | 0.604 |
|             |            | TT    | 3   | 6833±176 | 0.717 | 5   | 6260±141 | 0.172 |
|             |            | TT+CT | 24  | 6488±146 | 0.528 | 71  | 5599±152 | 0.470 |
|             |            | Trend |     |          | 0.513 |     |          | 0.336 |
| <i>SELE</i> | rs3917412  | CC    | 62  | 6616±164 |       | 131 | 5556±130 |       |
|             |            | CT    | 36  | 6394±197 | 0.489 | 84  | 5390±138 | 0.152 |
|             |            | TT    | 5   | 6100±130 | 0.278 | 15  | 5600±127 | 0.527 |
|             |            | TT+CT | 41  | 6359±189 | 0.372 | 99  | 5422±136 | 0.273 |
|             |            | Trend |     |          | 0.274 |     |          | 0.582 |
| <i>SELE</i> | rs3917410  | AA    | 96  | 6530±176 |       | 223 | 5523±133 |       |
|             |            | AG    | 7   | 6286±145 | 0.588 | 6   | 4783±117 | 0.250 |
| <i>SELE</i> | rs12084893 | AA    | 101 | 6517±174 |       | 217 | 5446±126 |       |
|             |            | AG    | 1   | 4800     | 0.002 | 12  | 6425±206 | 0.123 |
|             |            | GG    | 1   | 7900     | 0.545 |     |          |       |
|             |            | GG+AG | 2   | 6350±219 | 0.379 | 12  | 6425±206 | 0.123 |
|             |            | Trend |     |          | 0.681 |     |          | 0.123 |
| <i>SELE</i> | rs6427213  | AA    | 75  | 6488±183 |       | 171 | 5541±133 |       |
|             |            | AG    | 27  | 6537±151 | 0.333 | 53  | 5313±131 | 0.621 |
|             |            | GG    | 1   | 7800     | 0.001 | 5   | 6260±141 | 0.226 |
|             |            | GG+AG | 28  | 6582±150 | 0.255 | 58  | 5395±133 | 0.836 |
|             |            | Trend |     |          | 0.181 |     |          | 0.906 |
| <i>F5</i>   | rs3753305  | GG    | 88  | 6527±177 |       | 194 | 5580±136 |       |
|             |            | CG    | 13  | 6569±166 | 0.923 | 34  | 4941±945 | 0.010 |
|             |            | CC    | 2   | 5550±919 | 0.218 | 2   | 7050±162 | 0.001 |
|             |            | CC+CG | 15  | 6433±160 | 0.793 | 36  | 5058±107 | 0.075 |
|             |            | Trend |     |          | 0.542 |     |          | 0.340 |
| <i>SELP</i> | rs3917854  | CC    | 51  | 6788±192 |       | 115 | 5530±141 |       |
|             |            | CT    | 42  | 6167±143 | 0.087 | 96  | 5516±126 | 0.943 |
|             |            | TT    | 10  | 6570±183 | 0.983 | 18  | 5278±118 | 0.287 |
|             |            | TT+CT | 52  | 6244±150 | 0.155 | 114 | 5478±124 | 0.712 |
|             |            | Trend |     |          | 0.400 |     |          | 0.465 |
| <i>SELP</i> | rs6128     | TT    | 45  | 6667±187 |       | 101 | 5517±131 |       |
|             |            | CT    | 42  | 6390±164 | 0.637 | 99  | 5495±137 | 0.876 |
|             |            | CC    | 16  | 6406±167 | 0.654 | 29  | 5490±129 | 0.685 |
|             |            | CC+CT | 58  | 6395±163 | 0.587 | 128 | 5494±135 | 0.789 |
|             |            | Trend |     |          | 0.601 |     |          | 0.707 |
| <i>SELP</i> | rs3917818  | GG    | 101 | 6472±170 |       | 225 | 5465±127 |       |

|             |           |       |    |          |        |     |          |       |
|-------------|-----------|-------|----|----------|--------|-----|----------|-------|
|             |           | AG    | 2  | 8600±282 | 0.099  | 5   | 7000±283 | 0.153 |
| <i>SELP</i> | rs3766122 | CC    | 51 | 6590±186 |        | 102 | 5499±131 |       |
|             |           | CT    | 39 | 6477±171 | 0.996  | 99  | 5478±136 | 0.955 |
|             |           | TT    | 13 | 6323±140 | 0.599  | 28  | 5614±129 | 0.807 |
|             |           | TT+CT | 52 | 6438±163 | 0.856  | 127 | 5508±135 | 0.972 |
|             |           | Trend |    |          | 0.701  |     |          | 0.873 |
| <i>SELP</i> | rs3917802 | TT    | 96 | 6461±172 |        | 223 | 5457±127 |       |
|             |           | CT    | 1  | 6600     | 0.701  | 7   | 6829±234 | 0.062 |
|             |           | CC    | 1  | 10600    | <0.001 |     |          |       |
|             |           | CC+CT | 2  | 8600±282 | 0.099  | 7   | 6829±234 | 0.062 |
|             |           | Trend |    |          | <0.001 |     |          | 0.062 |
| <i>SELP</i> | rs760694  | GG    | 95 | 6511±175 |        | 211 | 5469±127 |       |
|             |           | GT    | 8  | 6550±165 | 0.701  | 19  | 5832±186 | 0.218 |
| <i>SELP</i> | rs2420378 | TT    | 75 | 6447±180 |        | 208 | 5467±127 |       |
|             |           | AT    | 4  | 7325±201 | 0.199  | 21  | 5886±178 | 0.131 |
|             |           | AA    | 7  | 7086±195 | 0.660  |     |          |       |
|             |           | AA+AT | 11 | 7173±188 | 0.305  | 21  | 5886±178 | 0.131 |
|             |           | Trend |    |          | 0.447  |     |          | 0.131 |
| <i>SELP</i> | rs3917744 | GG    | 93 | 6443±175 |        | 211 | 5527±134 |       |
|             |           | AG    | 10 | 7170±148 | 0.035  | 19  | 5179±117 | 0.750 |
| <i>SELP</i> | rs2076074 | GG    | 47 | 6917±190 |        | 95  | 5568±151 |       |
|             |           | AG    | 45 | 6142±158 | 0.133  | 105 | 5477±119 | 0.996 |
|             |           | AA    | 11 | 6309±128 | 0.312  | 29  | 5390±118 | 0.770 |
|             |           | AA+AG | 56 | 6175±152 | 0.118  | 134 | 5458±118 | 0.932 |
|             |           | Trend |    |          | 0.153  |     |          | 0.837 |
| <i>SELP</i> | rs3917740 | GG    | 62 | 6610±161 |        | 140 | 5486±134 |       |
|             |           | AG    | 33 | 6500±206 | 0.727  | 83  | 5464±126 | 0.790 |
|             |           | AA    | 8  | 5825±115 | 0.028  | 7   | 6157±180 | 0.282 |
|             |           | AA+AG | 41 | 6368±192 | 0.407  | 90  | 5518±131 | 0.610 |
|             |           | Trend |    |          | 0.149  |     |          | 0.437 |
| <i>SELP</i> | rs3917739 | TT    | 51 | 6202±145 |        | 116 | 5574±141 |       |
|             |           | CT    | 41 | 6790±189 | 0.133  | 93  | 5414±122 | 0.183 |
|             |           | CC    | 11 | 6927±222 | 0.173  | 20  | 5515±135 | 0.846 |
|             |           | CC+CT | 52 | 6819±194 | 0.070  | 113 | 5432±124 | 0.233 |
|             |           | Trend |    |          | 0.076  |     |          | 0.397 |
| <i>SELP</i> | rs6131    | CC    | 74 | 6481±177 |        | 163 | 5428±124 |       |
|             |           | CT    | 26 | 6654±178 | 0.747  | 57  | 5570±131 | 0.231 |
|             |           | TT    | 3  | 6100±100 | 0.283  | 10  | 6250±243 | 0.302 |
|             |           | TT+CT | 29 | 6597±169 | 0.694  | 67  | 5672±152 | 0.139 |
|             |           | Trend |    |          | 0.622  |     |          | 0.147 |
| <i>SELP</i> | rs3917709 | GG    | 72 | 6485±178 |        | 152 | 5450±124 |       |
|             |           | AG    | 28 | 6632±174 | 0.838  | 67  | 5491±130 | 0.683 |
|             |           | AA    | 3  | 6100±100 | 0.306  | 10  | 6250±243 | 0.329 |
|             |           | AA+AG | 31 | 6581±165 | 0.786  | 77  | 5590±150 | 0.443 |
|             |           | Trend |    |          | 0.711  |     |          | 0.331 |
| <i>SELP</i> | rs3917688 | CC    | 47 | 6417±179 |        | 99  | 5390±118 |       |
|             |           | CT    | 47 | 6489±170 | 0.954  | 108 | 5537±133 | 0.544 |
|             |           | TT    | 9  | 7144±171 | 0.316  | 23  | 5787±182 | 0.381 |
|             |           | TT+CT | 56 | 6595±170 | 0.871  | 131 | 5581±142 | 0.422 |

|               |            |       |     |          |        |     |          |        |
|---------------|------------|-------|-----|----------|--------|-----|----------|--------|
|               |            | Trend |     |          | 0.587  |     |          | 0.346  |
| <i>SELP</i>   | rs3917683  | TT    | 39  | 6303±174 |        | 99  | 5390±118 |        |
|               |            | CT    | 35  | 6434±177 | 0.771  | 106 | 5512±127 | 0.646  |
|               |            | CC    | 23  | 6913±161 | 0.429  | 24  | 5713±182 | 0.479  |
|               |            | CC+CT | 58  | 6624±171 | 0.589  | 130 | 5549±138 | 0.529  |
|               |            | Trend |     |          | 0.449  |     |          | 0.454  |
| <i>SELP</i>   | rs3917681  | AA    | 61  | 6428±180 |        | 152 | 5443±124 |        |
|               |            | AG    | 17  | 6982±185 | 0.256  | 67  | 5507±129 | 0.491  |
|               |            | GG    | 14  | 6093±128 | 0.394  | 10  | 6250±243 | 0.318  |
|               |            | GG+AG | 31  | 6581±165 | 0.716  | 77  | 5604±149 | 0.313  |
|               |            | Trend |     |          | 0.782  |     |          | 0.253  |
| <i>SELP</i>   | rs3753306  | TT    | 77  | 6445±170 |        | 170 | 5492±133 |        |
|               |            | CT    | 22  | 6527±187 | 1.000  | 57  | 5521±133 | 0.914  |
|               |            | CC    | 4   | 7750±171 | 0.509  | 2   | 6350±354 | 0.001  |
|               |            | CC+CT | 26  | 6715±187 | 0.851  | 59  | 5549±132 | 0.927  |
|               |            | Trend |     |          | 0.726  |     |          | 0.748  |
| <i>SELP</i>   | rs17523783 | GG    | 102 | 6530±174 |        | 224 | 5513±133 |        |
|               |            | GT    | 1   | 4800     | 0.002  | 6   | 4983±119 | 0.074  |
| <i>SELP</i>   | rs6691334  | GG    | 85  | 6487±175 |        | 194 | 5447±133 |        |
|               |            | AG    | 15  | 6460±175 | 0.970  | 35  | 5754±129 | 0.395  |
|               |            | AA    | 2   | 8450±212 | <0.001 | 1   | 6600     | <0.001 |
|               |            | AA+AG | 17  | 6694±177 | 0.825  | 36  | 5778±127 | 0.318  |
|               |            | Trend |     |          | 0.620  |     |          | 0.243  |
| <i>SELP</i>   | rs12401978 | AA    | 88  | 6469±173 |        | 195 | 5464±135 |        |
|               |            | AT    | 12  | 6317±170 | 0.952  | 33  | 5661±124 | 0.555  |
|               |            | TT    | 3   | 8600±300 | 0.003  | 1   | 6600     | <0.001 |
|               |            | TT+AT | 15  | 6773±178 | 0.690  | 34  | 5688±123 | 0.452  |
|               |            | Trend |     |          | 0.418  |     |          | 0.354  |
| <i>SELPLG</i> | rs9668031  | CC    | 40  | 6508±179 |        | 103 | 5607±128 |        |
|               |            | CT    | 56  | 6504±167 | 0.952  | 99  | 5452±145 | 0.150  |
|               |            | TT    | 7   | 6629±217 | 0.897  | 27  | 5304±997 | 0.248  |
|               |            | TT+CT | 63  | 6517±171 | 0.987  | 126 | 5420±136 | 0.109  |
|               |            | Trend |     |          | 0.950  |     |          | 0.128  |
| <i>SELPLG</i> | rs2228315  | CC    | 51  | 6575±182 |        | 120 | 5688±145 |        |
|               |            | CT    | 43  | 6395±173 | 0.577  | 94  | 5274±107 | 0.056  |
|               |            | TT    | 9   | 6733±138 | 0.387  | 15  | 5467±157 | 0.930  |
|               |            | TT+CT | 52  | 6454±167 | 0.771  | 109 | 5301±115 | 0.088  |
|               |            | Trend |     |          | 0.891  |     |          | 0.262  |
| <i>SELPLG</i> | rs3782522  | CC    | 36  | 6592±183 |        | 86  | 5778±148 |        |
|               |            | CT    | 50  | 6302±157 | 0.645  | 108 | 5324±120 | 0.029  |
|               |            | TT    | 17  | 6971±200 | 0.541  | 34  | 5374±124 | 0.350  |
|               |            | TT+CT | 67  | 6472±170 | 0.929  | 142 | 5336±120 | 0.039  |
|               |            | Trend |     |          | 0.655  |     |          | 0.152  |
| <i>CORO1C</i> | rs1558802  | AA    | 35  | 6606±181 |        | 78  | 5697±144 |        |
|               |            | AT    | 58  | 6547±170 | 0.778  | 118 | 5323±121 | 0.347  |
|               |            | TT    | 10  | 6000±179 | 0.125  | 33  | 5694±140 | 0.410  |
|               |            | TT+AT | 68  | 6466±171 | 0.541  | 151 | 5404±126 | 0.610  |
|               |            | Trend |     |          | 0.242  |     |          | 0.743  |
| <i>SENP3</i>  | rs4968212  | CC    | 40  | 6693±160 |        | 78  | 5522±146 |        |

|                 |            |       |     |          |       |     |          |        |
|-----------------|------------|-------|-----|----------|-------|-----|----------|--------|
|                 |            | CT    | 42  | 6493±178 | 0.687 | 94  | 5400±126 | 0.803  |
|                 |            | TT    | 21  | 6214±194 | 0.178 | 58  | 5628±124 | 0.352  |
|                 |            | TT+CT | 63  | 6400±182 | 0.358 | 152 | 5487±125 | 0.803  |
|                 |            | Trend |     |          | 0.198 |     |          | 0.401  |
| <i>SENP3</i>    | rs10438740 | GG    | 33  | 6327±193 |       | 80  | 5601±129 |        |
|                 |            | AG    | 41  | 6385±176 | 0.842 | 106 | 5453±140 | 0.556  |
|                 |            | AA    | 29  | 6907±144 | 0.175 | 44  | 5423±121 | 0.541  |
|                 |            | AA+AG | 70  | 6601±165 | 0.451 | 150 | 5444±135 | 0.490  |
|                 |            | Trend |     |          | 0.192 |     |          | 0.499  |
| <i>SERPINB2</i> | rs9320031  | CC    | 31  | 6242±141 |       | 69  | 5645±141 |        |
|                 |            | AC    | 55  | 6604±193 | 0.795 | 116 | 5476±125 | 0.541  |
|                 |            | AA    | 17  | 6718±166 | 0.321 | 45  | 5333±138 | 0.298  |
|                 |            | AA+AC | 72  | 6631±186 | 0.606 | 161 | 5436±129 | 0.393  |
|                 |            | Trend |     |          | 0.366 |     |          | 0.298  |
| <i>SERPINB2</i> | rs6105     | CC    | 95  | 6507±177 |       | 200 | 5529±135 |        |
|                 |            | CG    | 8   | 6588±132 | 0.444 | 28  | 5221±110 | 0.361  |
|                 |            | GG    |     |          |       | 2   | 6400±155 | 0.272  |
|                 |            | GG+CG | 8   | 6588±132 | 0.444 | 30  | 5300±114 | 0.317  |
|                 |            | Trend |     |          | 0.444 |     |          | 0.279  |
| <i>SERPINB2</i> | rs1916661  | GG    | 94  | 6429±165 |       | 213 | 5501±133 |        |
|                 |            | GT    | 9   | 7400±239 | 0.063 | 16  | 5288±107 | 0.600  |
|                 |            | TT    |     |          |       | 1   | 8300     | <0.001 |
|                 |            | TT+GT | 9   | 7400±239 | 0.063 | 17  | 5465±127 | 0.953  |
|                 |            | Trend |     |          | 0.063 |     |          | 0.722  |
| <i>SERPINB3</i> | rs4941210  | TT    | 43  | 6223±162 |       | 87  | 5444±128 |        |
|                 |            | CT    | 46  | 6683±174 | 0.167 | 101 | 5607±127 | 0.234  |
|                 |            | CC    | 14  | 6850±205 | 0.301 | 42  | 5352±154 | 0.695  |
|                 |            | CC+CT | 60  | 6722±180 | 0.131 | 143 | 5532±136 | 0.441  |
|                 |            | Trend |     |          | 0.169 |     |          | 0.997  |
| <i>SERPINB3</i> | rs1065205  | TT    | 33  | 6388±177 |       | 94  | 5654±149 |        |
|                 |            | CT    | 50  | 6512±167 | 0.921 | 99  | 5389±113 | 0.394  |
|                 |            | CC    | 20  | 6725±190 | 0.812 | 36  | 5428±136 | 0.388  |
|                 |            | CC+CT | 70  | 6573±173 | 0.860 | 135 | 5399±119 | 0.312  |
|                 |            | Trend |     |          | 0.816 |     |          | 0.319  |
| <i>SERPINB3</i> | rs3867263  | CC    | 52  | 6342±167 |       | 117 | 5533±123 |        |
|                 |            | CT    | 44  | 6666±163 | 0.174 | 92  | 5426±146 | 0.908  |
|                 |            | TT    | 7   | 6829±282 | 0.513 | 21  | 5624±128 | 0.607  |
|                 |            | TT+CT | 51  | 6688±180 | 0.153 | 113 | 5463±142 | 0.802  |
|                 |            | Trend |     |          | 0.213 |     |          | 0.685  |
| <i>SERPINB3</i> | rs12327459 | TT    | 90  | 6457±176 |       | 188 | 5485±128 |        |
|                 |            | CT    | 11  | 6773±169 | 0.632 | 35  | 5729±160 | 0.273  |
|                 |            | CC    | 2   | 7650±919 | 0.860 | 7   | 4714±438 | 0.051  |
|                 |            | CC+CT | 13  | 6908±160 | 0.632 | 42  | 5560±152 | 0.491  |
|                 |            | Trend |     |          | 0.642 |     |          | 0.801  |
| <i>SERPINB3</i> | rs12960185 | GG    | 102 | 6509±174 |       | 223 | 5523±134 |        |
|                 |            | AG    |     |          |       | 3   | 4567±451 | 0.052  |
| <i>SERPINC1</i> | rs6691053  | CC    | 50  | 6568±155 |       | 117 | 5562±135 |        |
|                 |            | CT    | 44  | 6448±182 | 0.501 | 87  | 5506±123 | 0.869  |
|                 |            | TT    | 9   | 6533±244 | 0.702 | 24  | 5038±125 | 0.282  |

|                 |           |       |    |          |       |     |          |       |
|-----------------|-----------|-------|----|----------|-------|-----|----------|-------|
|                 |           | TT+CT | 53 | 6462±191 | 0.622 | 111 | 5405±125 | 0.767 |
|                 |           | Trend |    |          | 0.894 |     |          | 0.452 |
| <i>SERPINC1</i> | rs2295957 | CC    | 82 | 6666±179 |       | 206 | 5527±133 |       |
|                 |           | CT    | 18 | 5744±136 | 0.028 | 24  | 5258±134 | 0.487 |
|                 |           | TT    | 1  | 5400     | 0.074 |     |          |       |
|                 |           | TT+CT | 19 | 5726±133 | 0.026 | 24  | 5258±134 | 0.487 |
|                 |           | Trend |    |          | 0.025 |     |          | 0.487 |
| <i>SERPINC1</i> | rs941989  | TT    | 45 | 6349±172 |       | 90  | 5266±113 |       |
|                 |           | CT    | 49 | 6747±175 | 0.352 | 102 | 5591±143 | 0.125 |
|                 |           | CC    | 9  | 6067±179 | 0.704 | 38  | 5803±140 | 0.110 |
|                 |           | CC+CT | 58 | 6641±175 | 0.498 | 140 | 5649±142 | 0.064 |
|                 |           | Trend |    |          | 0.840 |     |          | 0.063 |
| <i>SERPINC1</i> | rs2227589 | CC    | 53 | 6417±162 |       | 132 | 5539±134 |       |
|                 |           | CT    | 46 | 6467±172 | 0.962 | 84  | 5551±130 | 0.604 |
|                 |           | TT    | 4  | 8325±285 | 0.100 | 13  | 4838±127 | 0.294 |
|                 |           | TT+CT | 50 | 6616±186 | 0.701 | 97  | 5456±131 | 0.903 |
|                 |           | Trend |    |          | 0.368 |     |          | 0.707 |
| <i>SERPINC1</i> | rs1951626 | GG    | 43 | 6616±161 |       | 113 | 5580±136 |       |
|                 |           | AG    | 47 | 6357±177 | 0.397 | 91  | 5541±130 | 0.814 |
|                 |           | AA    | 11 | 6545±223 | 0.796 | 25  | 5028±123 | 0.198 |
|                 |           | AA+AG | 58 | 6393±185 | 0.499 | 116 | 5430±130 | 0.763 |
|                 |           | Trend |    |          | 0.805 |     |          | 0.383 |
| <i>SERPINC1</i> | rs7528380 | GG    | 60 | 6650±194 |       | 110 | 5593±141 |       |
|                 |           | AG    | 38 | 6353±149 | 0.287 | 105 | 5423±125 | 0.283 |
|                 |           | AA    | 5  | 6100±490 | 0.607 | 14  | 5457±121 | 0.560 |
|                 |           | AA+AG | 43 | 6323±141 | 0.285 | 119 | 5427±124 | 0.264 |
|                 |           | Trend |    |          | 0.304 |     |          | 0.286 |
| <i>SERPINE1</i> | rs6950982 | AA    | 68 | 6537±184 |       | 163 | 5540±136 |       |
|                 |           | AG    | 29 | 6493±166 | 0.899 | 61  | 5348±115 | 0.251 |
|                 |           | GG    | 6  | 6350±672 | 0.990 | 6   | 5917±207 | 0.951 |
|                 |           | GG+AG | 35 | 6469±153 | 0.911 | 67  | 5399±125 | 0.291 |
|                 |           | Trend |    |          | 0.931 |     |          | 0.412 |
| <i>SERPINE1</i> | rs2227631 | GG    | 52 | 6562±191 |       | 97  | 5275±129 |       |
|                 |           | AG    | 41 | 6561±155 | 0.862 | 104 | 5718±142 | 0.045 |
|                 |           | AA    | 10 | 6070±164 | 0.327 | 29  | 5459±969 | 0.088 |
|                 |           | AA+AG | 51 | 6465±156 | 0.883 | 133 | 5662±134 | 0.029 |
|                 |           | Trend |    |          | 0.554 |     |          | 0.031 |
| <i>SERPINE1</i> | rs2227667 | AA    | 31 | 6368±159 |       | 73  | 5456±116 |       |
|                 |           | AG    | 57 | 6463±180 | 0.571 | 115 | 5614±144 | 0.412 |
|                 |           | GG    | 15 | 7007±180 | 0.075 | 42  | 5257±125 | 0.574 |
|                 |           | GG+AG | 72 | 6576±180 | 0.377 | 157 | 5518±140 | 0.664 |
|                 |           | Trend |    |          | 0.116 |     |          | 0.733 |
| <i>SERPINE1</i> | rs2227672 | GG    | 90 | 6603±173 |       | 197 | 5530±136 |       |
|                 |           | GT    | 13 | 5892±173 | 0.073 | 31  | 5274±113 | 0.600 |
|                 |           | TT    |    |          |       | 2   | 5900±990 | 0.054 |
|                 |           | TT+GT | 13 | 5892±173 | 0.073 | 33  | 5312±111 | 0.777 |
|                 |           | Trend |    |          | 0.073 |     |          | 0.999 |
| <i>SERPINE1</i> | rs2070682 | TT    | 25 | 6576±180 |       | 70  | 5333±130 |       |
|                 |           | CT    | 58 | 6536±173 | 0.965 | 111 | 5561±143 | 0.435 |

|                  |            |       |     |          |        |     |          |       |
|------------------|------------|-------|-----|----------|--------|-----|----------|-------|
|                  |            | CC    | 20  | 6370±177 | 0.576  | 49  | 5594±110 | 0.337 |
|                  |            | CC+CT | 78  | 6494±173 | 0.840  | 160 | 5571±134 | 0.348 |
|                  |            | Trend |     |          | 0.592  |     |          | 0.320 |
| <i>SERPINE1</i>  | rs2227692  | CC    | 40  | 6388±172 |        | 100 | 5463±118 |       |
|                  |            | CT    | 52  | 6306±165 | 0.682  | 100 | 5591±146 | 0.559 |
|                  |            | TT    | 10  | 7780±168 | <0.001 | 30  | 5310±133 | 0.484 |
|                  |            | TT+CT | 62  | 6544±173 | 0.319  | 130 | 5526±143 | 0.830 |
|                  |            | Trend |     |          | 0.023  |     |          | 0.731 |
| <i>SERPINE1</i>  | rs1050813  | GG    | 101 | 6521±175 |        | 220 | 5539±132 |       |
|                  |            | AG    | 1   | 6800     | 0.143  | 8   | 4613±128 | 0.037 |
| <i>LOC390183</i> | rs2649663  | AA    | 80  | 6585±178 |        | 183 | 5489±133 |       |
|                  |            | AG    | 20  | 6190±157 | 0.317  | 44  | 5568±135 | 0.697 |
|                  |            | GG    | 3   | 6767±193 | 0.335  | 2   | 4750±71  | 0.404 |
|                  |            | GG+AG | 23  | 6265±159 | 0.250  | 46  | 5533±133 | 0.642 |
|                  |            | Trend |     |          | 0.203  |     |          | 0.588 |
| <i>LOC390183</i> | rs3758919  | GG    | 69  | 6438±161 |        | 163 | 5475±130 |       |
|                  |            | AG    | 29  | 6428±189 | 0.709  | 56  | 5398±110 | 0.703 |
|                  |            | AA    | 5   | 8060±211 | 0.043  | 10  | 6570±230 | 0.034 |
|                  |            | AA+AG | 34  | 6668±198 | 0.750  | 66  | 5576±139 | 0.542 |
|                  |            | Trend |     |          | 0.328  |     |          | 0.184 |
| <i>SERPING1</i>  | rs1005510  | TT    | 52  | 6477±163 |        | 123 | 5508±125 |       |
|                  |            | CT    | 42  | 6507±173 | 0.842  | 82  | 5415±125 | 0.631 |
|                  |            | CC    | 9   | 6756±248 | 0.779  | 24  | 5788±188 | 0.221 |
|                  |            | CC+CT | 51  | 6551±185 | 0.958  | 106 | 5499±141 | 0.902 |
|                  |            | Trend |     |          | 0.898  |     |          | 0.465 |
| <i>SERPING1</i>  | rs11603020 | TT    | 69  | 6438±161 |        | 163 | 5475±130 |       |
|                  |            | CT    | 29  | 6428±189 | 0.709  | 58  | 5426±110 | 0.861 |
|                  |            | CC    | 5   | 8060±211 | 0.043  | 8   | 6663±258 | 0.077 |
|                  |            | CC+CT | 34  | 6668±198 | 0.750  | 66  | 5576±139 | 0.542 |
|                  |            | Trend |     |          | 0.328  |     |          | 0.236 |
| <i>SERPINI1</i>  | rs11921535 | GG    | 49  | 6551±160 |        | 111 | 5386±133 |       |
|                  |            | AG    | 41  | 6478±184 | 0.606  | 100 | 5683±136 | 0.095 |
|                  |            | AA    | 13  | 6485±202 | 0.718  | 19  | 5189±986 | 0.910 |
|                  |            | AA+AG | 54  | 6480±186 | 0.560  | 119 | 5604±132 | 0.131 |
|                  |            | Trend |     |          | 0.600  |     |          | 0.283 |
| <i>SERPINI1</i>  | rs9883327  | GG    | 58  | 6309±159 |        | 135 | 5616±131 |       |
|                  |            | AG    | 39  | 6592±189 | 0.941  | 80  | 5313±137 | 0.095 |
|                  |            | AA    | 6   | 7983±158 | 0.004  | 15  | 5433±121 | 0.903 |
|                  |            | AA+AG | 45  | 6778±189 | 0.555  | 95  | 5332±134 | 0.134 |
|                  |            | Trend |     |          | 0.170  |     |          | 0.314 |
| <i>SERPINI1</i>  | rs9856551  | AA    | 100 | 6510±171 |        | 209 | 5500±134 |       |
|                  |            | AG    | 2   | 5800±353 | 0.604  | 21  | 5490±124 | 0.623 |
|                  |            | GG    | 1   | 8300     | 0.692  |     |          |       |
|                  |            | GG+AG | 3   | 6633±288 | 0.660  | 21  | 5490±124 | 0.623 |
|                  |            | Trend |     |          | 0.743  |     |          | 0.623 |
| <i>SERPINI1</i>  | rs9859639  | AA    | 57  | 6175±162 |        | 137 | 5531±132 |       |
|                  |            | AT    | 41  | 6768±177 | 0.193  | 82  | 5417±138 | 0.445 |
|                  |            | TT    | 5   | 8280±156 | 0.002  | 11  | 5700±991 | 0.272 |
|                  |            | TT+AT | 46  | 6933±180 | 0.061  | 93  | 5451±134 | 0.701 |

|                 |            |       |     |          |        |     |          |        |
|-----------------|------------|-------|-----|----------|--------|-----|----------|--------|
|                 |            | Trend |     |          | 0.015  |     |          | 0.890  |
| <i>SERPINI1</i> | rs13090836 | TT    | 51  | 6251±155 |        | 121 | 5638±130 |        |
|                 |            | CT    | 38  | 6613±197 | 0.867  | 93  | 5329±138 | 0.049  |
|                 |            | CC    | 14  | 7200±159 | 0.059  | 16  | 5431±116 | 0.996  |
|                 |            | CC+CT | 52  | 6771±188 | 0.414  | 109 | 5344±135 | 0.085  |
|                 |            | Trend |     |          | 0.133  |     |          | 0.279  |
| <i>SERPINI1</i> | rs16851469 | AA    | 85  | 6507±171 |        | 213 | 5539±133 |        |
|                 |            | AC    | 4   | 5000±144 | 0.059  | 14  | 5157±134 | 0.336  |
|                 |            | CC    | 3   | 6900±249 | 0.939  | 3   | 4200±361 | <0.001 |
|                 |            | CC+AC | 7   | 5814±204 | 0.229  | 17  | 4988±127 | 0.156  |
|                 |            | Trend |     |          | 0.455  |     |          | 0.053  |
| <i>SERPINI1</i> | rs9858935  | GG    | 92  | 6490±177 |        | 200 | 5454±134 |        |
|                 |            | AG    | 10  | 6830±146 | 0.193  | 29  | 5762±120 | 0.042  |
|                 |            | AA    | 1   | 5500     | <0.001 | 1   | 6800     | <0.001 |
|                 |            | AA+AG | 11  | 6709±144 | 0.341  | 30  | 5797±119 | 0.023  |
|                 |            | Trend |     |          | 0.579  |     |          | 0.011  |
| <i>SERPINI1</i> | rs13093535 | TT    | 94  | 6511±177 |        | 214 | 5482±134 |        |
|                 |            | CT    | 8   | 6588±155 | 0.489  | 16  | 5725±119 | 0.173  |
|                 |            | CC    | 1   | 6200     | 0.139  |     |          |        |
|                 |            | CC+CT | 9   | 6544±146 | 0.557  | 16  | 5725±119 | 0.173  |
|                 |            | Trend |     |          | 0.645  |     |          | 0.173  |
| <i>SERPINI1</i> | rs3804617  | TT    | 88  | 6503±180 |        | 215 | 5472±133 |        |
|                 |            | CT    | 10  | 6530±138 | 0.054  | 12  | 5858±128 | 0.081  |
|                 |            | CC    | 2   | 5850±495 | 0.269  | 2   | 6100±127 | 0.043  |
|                 |            | CC+CT | 12  | 6417±128 | 0.038  | 14  | 5893±124 | 0.058  |
|                 |            | Trend |     |          | 0.053  |     |          | 0.067  |
| <i>SERPINI1</i> | rs10513634 | TT    | 94  | 6511±177 |        | 217 | 5487±135 |        |
|                 |            | AT    | 9   | 6544±146 | 0.557  | 13  | 5692±955 | 0.287  |
| <i>SERPINI1</i> | rs16851498 | AA    | 102 | 6524±174 |        | 223 | 5484±133 |        |
|                 |            | AG    | 1   | 5500     | <0.001 | 7   | 5971±138 | 0.044  |
| <i>SERPINI1</i> | rs3792297  | CC    | 62  | 6553±186 |        | 194 | 5428±132 |        |
|                 |            | CG    | 29  | 6431±173 | 0.623  | 27  | 5707±128 | 0.168  |
|                 |            | GG    | 10  | 6510±117 | 0.937  | 7   | 6000±877 | 0.037  |
|                 |            | GG+CG | 39  | 6451±159 | 0.708  | 34  | 5768±120 | 0.050  |
|                 |            | Trend |     |          | 0.836  |     |          | 0.021  |
| <i>SERPINI1</i> | rs1552746  | TT    | 91  | 6499±179 |        | 210 | 5477±135 |        |
|                 |            | CT    | 11  | 6709±129 | 0.272  | 18  | 5656±115 | 0.617  |
|                 |            | CC    | 1   | 5700     | 0.320  | 2   | 6400±283 | <0.001 |
|                 |            | CC+CT | 12  | 6625±126 | 0.322  | 20  | 5730±111 | 0.314  |
|                 |            | Trend |     |          | 0.410  |     |          | 0.148  |
| <i>SERPINI1</i> | rs7641394  | TT    | 91  | 6505±173 |        | 202 | 5441±124 |        |
|                 |            | CT    | 12  | 6575±184 | 0.755  | 27  | 5989±182 | 0.087  |
|                 |            | CC    |     |          |        | 1   | 3900     | <0.001 |
|                 |            | CC+CT | 12  | 6575±184 | 0.755  | 28  | 5914±183 | 0.149  |
|                 |            | Trend |     |          | 0.755  |     |          | 0.278  |
| <i>SERPINI1</i> | rs6785838  | CC    | 92  | 6508±179 |        | 209 | 5475±134 |        |
|                 |            | CG    | 10  | 6650±134 | 0.273  | 19  | 5668±119 | 0.378  |
|                 |            | GG    | 1   | 5700     | 0.325  | 2   | 6400±283 | <0.001 |
|                 |            | GG+CG | 11  | 6564±131 | 0.322  | 21  | 5738±115 | 0.174  |

|          |            |       |    |          |        |     |          |        |
|----------|------------|-------|----|----------|--------|-----|----------|--------|
|          |            | Trend |    |          | 0.412  |     |          | 0.071  |
| SERPINI1 | rs7651327  | TT    | 92 | 6508±179 |        | 208 | 5469±134 |        |
|          |            | CT    | 7  | 6757±130 | 0.156  | 20  | 5715±118 | 0.268  |
|          |            | CC    | 4  | 6225±143 | 0.914  | 2   | 6400±283 | <0.001 |
|          |            | CC+CT | 11 | 6564±131 | 0.322  | 22  | 5777±114 | 0.118  |
|          |            | Trend |    |          | 0.560  |     |          | 0.043  |
| SERPINI1 | rs720958   | AA    | 92 | 6508±179 |        | 214 | 5473±135 |        |
|          |            | AG    | 8  | 6513±139 | 0.409  | 14  | 5757±939 | 0.236  |
|          |            | GG    | 3  | 6700±132 | 0.536  | 2   | 6400±283 | <0.001 |
|          |            | GG+AG | 11 | 6564±131 | 0.322  | 16  | 5838±904 | 0.086  |
|          |            | Trend |    |          | 0.329  |     |          | 0.020  |
| SERPINI1 | rs3792298  | CC    | 94 | 6562±177 |        | 209 | 5456±130 |        |
|          |            | AC    | 8  | 6075±137 | 0.378  | 20  | 6040±149 | 0.051  |
|          |            | AA    | 1  | 5500     | <0.001 |     |          |        |
|          |            | AA+AC | 9  | 6011±129 | 0.247  | 20  | 6040±149 | 0.051  |
|          |            | Trend |    |          | 0.142  |     |          | 0.051  |
| SOCS1    | rs149597   | CC    | 53 | 6275±164 |        | 152 | 5438±124 |        |
|          |            | CG    | 43 | 6737±178 | 0.534  | 64  | 5598±150 | 0.682  |
|          |            | GG    | 7  | 6943±217 | 0.508  | 13  | 5808±139 | 0.692  |
|          |            | GG+CG | 50 | 6766±182 | 0.458  | 77  | 5634±148 | 0.606  |
|          |            | Trend |    |          | 0.423  |     |          | 0.591  |
| SOCS1    | rs243317   | CC    | 52 | 6281±164 |        | 152 | 5447±124 |        |
|          |            | AC    | 44 | 6720±178 | 0.466  | 64  | 5578±152 | 0.797  |
|          |            | AA    | 7  | 6943±217 | 0.499  | 13  | 5808±139 | 0.705  |
|          |            | AA+AC | 51 | 6751±181 | 0.401  | 77  | 5617±149 | 0.707  |
|          |            | Trend |    |          | 0.384  |     |          | 0.665  |
| SOCS2    | rs7969157  | GG    | 56 | 6730±174 |        | 109 | 5466±125 |        |
|          |            | GT    | 38 | 6479±180 | 0.548  | 99  | 5528±141 | 0.562  |
|          |            | TT    | 7  | 5157±924 | 0.002  | 22  | 5527±138 | 0.636  |
|          |            | TT+GT | 45 | 6273±175 | 0.197  | 121 | 5528±140 | 0.734  |
|          |            | Trend |    |          | 0.036  |     |          | 0.964  |
| SOCS2    | rs3782415  | TT    | 24 | 5996±166 |        | 73  | 5608±143 |        |
|          |            | CT    | 30 | 6910±214 | 0.110  | 105 | 5409±120 | 0.219  |
|          |            | CC    | 47 | 6538±147 | 0.161  | 48  | 5604±145 | 0.854  |
|          |            | CC+CT | 77 | 6683±176 | 0.086  | 153 | 5470±128 | 0.326  |
|          |            | Trend |    |          | 0.237  |     |          | 0.720  |
| SOCS2    | rs3816997  | AA    | 64 | 6680±174 |        | 141 | 5521±131 |        |
|          |            | AC    | 32 | 6481±177 | 0.405  | 80  | 5468±136 | 0.639  |
|          |            | CC    | 7  | 5143±866 | 0.001  | 9   | 5433±152 | 0.922  |
|          |            | CC+AC | 39 | 6241±171 | 0.114  | 89  | 5464±137 | 0.644  |
|          |            | Trend |    |          | 0.014  |     |          | 0.689  |
| SOCS2    | rs10745657 | AA    | 69 | 6306±166 |        | 136 | 5524±136 |        |
|          |            | AG    | 31 | 6842±179 | 0.084  | 70  | 5484±135 | 0.711  |
|          |            | GG    | 3  | 7900±238 | 0.172  | 24  | 5396±107 | 0.480  |
|          |            | GG+AG | 34 | 6935±183 | 0.055  | 94  | 5462±128 | 0.953  |
|          |            | Trend |    |          | 0.039  |     |          | 0.758  |
| SOCS3    | rs8069976  | CC    | 70 | 6514±160 |        | 166 | 5443±134 |        |
|          |            | AC    | 32 | 6591±201 | 0.800  | 53  | 5677±130 | 0.631  |
|          |            | AA    | 1  | 4000     | 0.001  | 11  | 5473±122 | 0.230  |



|        |            |       |     |          |        |     |          |       |
|--------|------------|-------|-----|----------|--------|-----|----------|-------|
|        |            | AA+AC | 33  | 6512±202 | 0.923  | 64  | 5642±128 | 0.940 |
|        |            | Trend |     |          | 0.814  |     |          | 0.715 |
| SOCS3  | rs4969168  | GG    | 41  | 6339±186 |        | 61  | 5428±127 |       |
|        |            | AG    | 39  | 6713±168 | 0.508  | 123 | 5565±140 | 0.328 |
|        |            | AA    | 23  | 6487±163 | 0.779  | 46  | 5415±121 | 0.560 |
|        |            | AA+AG | 62  | 6629±165 | 0.557  | 169 | 5524±135 | 0.340 |
|        |            | Trend |     |          | 0.699  |     |          | 0.510 |
| SOCS3  | rs4969170  | AA    | 78  | 6415±182 |        | 181 | 5525±134 |       |
|        |            | AG    | 18  | 6872±158 | 0.039  | 45  | 5427±132 | 0.500 |
|        |            | GG    | 7   | 6686±114 | 0.392  | 3   | 4900±985 | 0.578 |
|        |            | GG+AG | 25  | 6820±145 | 0.046  | 48  | 5394±130 | 0.446 |
|        |            | Trend |     |          | 0.103  |     |          | 0.405 |
| SOCS3  | rs8074003  | CC    | 81  | 6612±187 |        | 163 | 5496±138 |       |
|        |            | CT    | 20  | 6215±109 | 0.163  | 65  | 5463±115 | 0.992 |
|        |            | TT    | 2   | 5500±0   | <0.001 | 2   | 6850±247 | 0.092 |
|        |            | TT+CT | 22  | 6150±106 | 0.083  | 67  | 5504±119 | 0.842 |
|        |            | Trend |     |          | 0.030  |     |          | 0.660 |
| WDHD1  | rs1209087  | TT    | 69  | 6512±177 |        | 139 | 5412±132 |       |
|        |            | CT    | 31  | 6497±176 | 0.830  | 80  | 5583±132 | 0.534 |
|        |            | CC    | 3   | 6733±850 | 0.208  | 10  | 6010±150 | 0.235 |
|        |            | CC+CT | 34  | 6518±169 | 0.752  | 90  | 5630±134 | 0.383 |
|        |            | Trend |     |          | 0.652  |     |          | 0.263 |
| SOCS4  | rs1952438  | GG    | 100 | 6553±173 |        | 203 | 5488±130 |       |
|        |            | AG    | 3   | 5200±190 | 0.108  | 27  | 5581±153 | 0.948 |
| SOCS4  | rs11851178 | AA    | 70  | 6497±176 |        | 143 | 5426±130 |       |
|        |            | AG    | 32  | 6563±174 | 0.686  | 77  | 5592±134 | 0.500 |
|        |            | GG    | 1   | 6100     | 0.998  | 9   | 6056±158 | 0.333 |
|        |            | GG+AG | 33  | 6548±171 | 0.689  | 86  | 5641±137 | 0.382 |
|        |            | Trend |     |          | 0.695  |     |          | 0.295 |
| SOD1   | rs202445   | TT    | 87  | 6423±175 |        | 224 | 5502±133 |       |
|        |            | CT    | 16  | 7006±160 | 0.314  | 4   | 5700±860 | 0.977 |
| SOD1   | rs10432782 | TT    | 33  | 6324±194 |        | 81  | 5712±159 |       |
|        |            | GT    | 47  | 6566±167 | 0.566  | 113 | 5380±111 | 0.548 |
|        |            | GG    | 23  | 6678±161 | 0.439  | 35  | 5423±129 | 0.808 |
|        |            | GG+GT | 70  | 6603±164 | 0.481  | 148 | 5390±115 | 0.577 |
|        |            | Trend |     |          | 0.433  |     |          | 0.705 |
| SOD1   | rs1041740  | CC    | 55  | 6656±170 |        | 63  | 5640±150 |       |
|        |            | CT    | 31  | 6203±177 | 0.474  | 122 | 5449±113 | 0.424 |
|        |            | TT    | 17  | 6618±183 | 0.808  | 43  | 5453±158 | 0.243 |
|        |            | TT+CT | 48  | 6350±178 | 0.644  | 165 | 5450±126 | 0.297 |
|        |            | Trend |     |          | 0.964  |     |          | 0.236 |
| SFRS15 | rs2833475  | AA    | 32  | 6356±196 |        | 82  | 5682±160 |       |
|        |            | AG    | 48  | 6540±166 | 0.626  | 112 | 5399±110 | 0.768 |
|        |            | GG    | 23  | 6678±161 | 0.468  | 35  | 5423±129 | 0.907 |
|        |            | GG+AG | 71  | 6585±163 | 0.536  | 147 | 5405±114 | 0.785 |
|        |            | Trend |     |          | 0.468  |     |          | 0.854 |
| SOD2   | rs5746136  | CC    | 29  | 6655±148 |        | 74  | 5741±156 |       |
|        |            | CT    | 45  | 6653±193 | 0.846  | 104 | 5374±121 | 0.282 |
|        |            | TT    | 29  | 6155±165 | 0.166  | 51  | 5425±114 | 0.529 |

|       |            |       |    |          |       |     |          |       |
|-------|------------|-------|----|----------|-------|-----|----------|-------|
|       |            | TT+CT | 74 | 6458±183 | 0.394 | 155 | 5391±119 | 0.299 |
|       |            | Trend |    |          |       |     |          | 0.462 |
| SOD2  | rs2758331  | CC    | 78 | 6362±174 |       | 168 | 5507±121 |       |
|       |            | AC    | 22 | 7132±166 | 0.044 | 58  | 5502±164 | 0.540 |
|       |            | AA    | 3  | 5933±151 | 0.252 | 3   | 5600±854 | 0.399 |
|       |            | AA+AC | 25 | 6988±166 | 0.122 | 61  | 5507±160 | 0.602 |
|       |            | Trend |    |          |       |     |          | 0.695 |
| SOD2  | rs2758352  | GG    | 39 | 6346±165 |       | 92  | 5388±114 |       |
|       |            | AG    | 56 | 6693±189 | 0.424 | 107 | 5600±148 | 0.374 |
|       |            | AA    | 8  | 6075±709 | 0.703 | 31  | 5477±128 | 0.943 |
|       |            | AA+AG | 64 | 6616±179 | 0.425 | 138 | 5572±143 | 0.475 |
|       |            | Trend |    |          |       |     |          | 0.770 |
| SOD3  | rs2284659  | TT    | 45 | 6473±151 |       | 106 | 5394±132 |       |
|       |            | GT    | 47 | 6789±196 | 0.609 | 103 | 5537±117 | 0.560 |
|       |            | GG    | 11 | 5500±128 | 0.093 | 21  | 5838±195 | 0.340 |
|       |            | GG+GT | 58 | 6545±191 | 0.962 | 124 | 5588±133 | 0.380 |
|       |            | Trend |    |          |       |     |          | 0.301 |
| SOD3  | rs758946   | TT    | 88 | 6525±172 |       | 200 | 5470±129 |       |
|       |            | CT    | 13 | 6446±195 | 0.863 | 30  | 5693±153 | 0.817 |
|       |            | CC    | 2  | 6450±176 | 0.829 |     |          |       |
|       |            | CC+CT | 15 | 6447±187 | 0.843 | 30  | 5693±153 | 0.817 |
|       |            | Trend |    |          |       |     |          | 0.817 |
| GLS   | rs13035504 | CC    | 97 | 6564±177 |       | 211 | 5490±134 |       |
|       |            | CG    | 6  | 5700±727 | 0.095 | 17  | 5659±117 | 0.370 |
| STAT1 | rs1400657  | TT    | 47 | 6638±187 |       | 176 | 5503±131 |       |
|       |            | GT    | 41 | 6441±176 | 0.509 | 42  | 5324±116 | 0.981 |
|       |            | GG    | 14 | 6336±130 | 0.661 | 8   | 5250±147 | 0.874 |
|       |            | GG+GT | 55 | 6415±164 | 0.503 | 50  | 5312±120 | 0.966 |
|       |            | Trend |    |          |       |     |          | 0.924 |
| STAT1 | rs4853533  | TT    | 54 | 6683±177 |       | 113 | 5588±131 |       |
|       |            | CT    | 41 | 6266±173 | 0.203 | 95  | 5521±139 | 0.724 |
|       |            | CC    | 8  | 6638±158 | 0.455 | 21  | 4976±996 | 0.062 |
|       |            | CC+CT | 49 | 6327±170 | 0.182 | 116 | 5422±134 | 0.440 |
|       |            | Trend |    |          |       |     |          | 0.171 |
| STAT1 | rs13395505 | AA    | 33 | 6752±195 |       | 80  | 5649±129 |       |
|       |            | AG    | 55 | 6571±161 | 0.787 | 113 | 5468±142 | 0.739 |
|       |            | GG    | 15 | 5780±159 | 0.012 | 37  | 5268±106 | 0.461 |
|       |            | GG+AG | 70 | 6401±163 | 0.375 | 150 | 5419±134 | 0.616 |
|       |            | Trend |    |          |       |     |          | 0.481 |
| STAT1 | rs2066804  | GG    | 30 | 6047±150 |       | 63  | 5273±115 |       |
|       |            | AG    | 49 | 6698±169 | 0.022 | 117 | 5579±142 | 0.186 |
|       |            | AA    | 24 | 6721±204 | 0.073 | 50  | 5594±129 | 0.386 |
|       |            | AA+AG | 73 | 6705±180 | 0.015 | 167 | 5584±138 | 0.184 |
|       |            | Trend |    |          |       |     |          | 0.337 |
| STAT1 | rs7562024  | TT    | 82 | 6541±173 |       | 179 | 5499±139 |       |
|       |            | CT    | 13 | 6462±202 | 0.457 | 47  | 5504±112 | 0.678 |
|       |            | CC    | 7  | 5957±120 | 0.047 | 2   | 5750±148 | 0.193 |
|       |            | CC+CT | 20 | 6285±176 | 0.154 | 49  | 5514±111 | 0.571 |
|       |            | Trend |    |          |       |     |          | 0.459 |

|       |            |       |    |          |       |     |          |       |
|-------|------------|-------|----|----------|-------|-----|----------|-------|
| STAT1 | rs12693591 | CC    | 54 | 6357±205 |       | 133 | 5556±132 |       |
|       |            | AC    | 42 | 6731±131 | 0.293 | 86  | 5413±136 | 0.190 |
|       |            | AA    | 7  | 6414±129 | 0.302 | 11  | 5473±112 | 0.911 |
|       |            | AA+AC | 49 | 6686±130 | 0.228 | 97  | 5420±133 | 0.217 |
|       |            | Trend |    |          | 0.197 |     |          | 0.310 |
| STAT1 | rs10173099 | TT    | 30 | 6477±209 |       | 106 | 5506±141 |       |
|       |            | CT    | 42 | 6457±175 | 0.794 | 86  | 5376±125 | 0.495 |
|       |            | CC    | 27 | 6515±129 | 0.983 | 33  | 5652±108 | 0.484 |
|       |            | CC+CT | 69 | 6480±158 | 0.840 | 119 | 5452±121 | 0.767 |
|       |            | Trend |    |          | 0.961 |     |          | 0.795 |
| STAT1 | rs1467199  | GG    | 35 | 6963±210 |       | 68  | 5634±155 |       |
|       |            | CG    | 43 | 6367±158 | 0.313 | 108 | 5387±122 | 0.377 |
|       |            | CC    | 25 | 6136±132 | 0.125 | 53  | 5575±121 | 0.859 |
|       |            | CC+CG | 68 | 6282±148 | 0.180 | 161 | 5449±122 | 0.573 |
|       |            | Trend |    |          | 0.123 |     |          | 0.939 |
| STAT1 | rs6751855  | GG    | 89 | 6511±180 |       | 160 | 5495±135 |       |
|       |            | AG    | 11 | 6509±150 | 0.761 | 55  | 5291±121 | 0.450 |
|       |            | AA    | 2  | 6250±71  | 0.194 | 7   | 6657±106 | 0.001 |
|       |            | AA+AG | 13 | 6469±137 | 0.971 | 62  | 5445±126 | 0.934 |
|       |            | Trend |    |          | 0.840 |     |          | 0.479 |
| STAT4 | rs16833177 | TT    | 31 | 6371±142 |       | 67  | 5581±118 |       |
|       |            | CT    | 53 | 6532±178 | 0.870 | 119 | 5445±125 | 0.073 |
|       |            | CC    | 19 | 6695±211 | 0.742 | 43  | 5547±172 | 0.393 |
|       |            | CC+CT | 72 | 6575±186 | 0.987 | 162 | 5472±138 | 0.089 |
|       |            | Trend |    |          | 0.768 |     |          | 0.277 |
| STAT4 | rs7558921  | GG    | 74 | 6428±157 |       | 163 | 5448±139 |       |
|       |            | CG    | 27 | 6670±216 | 0.407 | 64  | 5586±117 | 0.325 |
|       |            | CC    | 2  | 7550±134 | 0.089 | 3   | 6400±608 | 0.201 |
|       |            | CC+CG | 29 | 6731±211 | 0.291 | 67  | 5622±116 | 0.256 |
|       |            | Trend |    |          | 0.194 |     |          | 0.193 |
| STAT4 | rs6740131  | AA    | 58 | 6595±150 |       | 138 | 5519±142 |       |
|       |            | AG    | 36 | 6319±205 | 0.650 | 82  | 5420±121 | 0.919 |
|       |            | GG    | 9  | 6767±197 | 0.802 | 10  | 5870±690 | 0.023 |
|       |            | GG+AG | 45 | 6409±202 | 0.760 | 92  | 5468±117 | 0.782 |
|       |            | Trend |    |          | 0.947 |     |          | 0.424 |
| STAT4 | rs3024912  | CC    | 27 | 6833±235 |       | 65  | 5695±156 |       |
|       |            | AC    | 50 | 6566±152 | 0.549 | 110 | 5358±123 | 0.274 |
|       |            | AA    | 26 | 6081±132 | 0.150 | 54  | 5570±120 | 0.959 |
|       |            | AA+AC | 76 | 6400±146 | 0.353 | 164 | 5428±122 | 0.444 |
|       |            | Trend |    |          | 0.156 |     |          | 0.973 |
| STAT4 | rs3024896  | CC    | 44 | 6548±144 |       | 78  | 5571±122 |       |
|       |            | CT    | 46 | 6457±192 | 0.504 | 113 | 5381±123 | 0.061 |
|       |            | TT    | 13 | 6600±209 | 0.918 | 38  | 5732±177 | 0.955 |
|       |            | TT+CT | 59 | 6488±194 | 0.609 | 151 | 5470±138 | 0.149 |
|       |            | Trend |    |          | 0.895 |     |          | 0.617 |
| STAT4 | rs925847   | CC    | 29 | 6476±148 |       | 54  | 5589±131 |       |
|       |            | CT    | 51 | 6586±179 | 0.610 | 126 | 5375±117 | 0.105 |
|       |            | TT    | 23 | 6400±198 | 0.711 | 50  | 5712±167 | 0.682 |
|       |            | TT+CT | 74 | 6528±184 | 0.594 | 176 | 5471±133 | 0.184 |

|       |            |       |    |          |       |     |          |       |
|-------|------------|-------|----|----------|-------|-----|----------|-------|
|       |            | Trend |    |          | 0.680 |     |          | 0.660 |
| STAT4 | rs16833215 | AA    | 27 | 6652±149 |       | 69  | 5713±122 |       |
|       |            | AG    | 35 | 6620±198 | 0.412 | 108 | 5380±126 | 0.015 |
|       |            | GG    | 38 | 6292±164 | 0.091 | 51  | 5478±158 | 0.312 |
|       |            | GG+AG | 73 | 6449±181 | 0.143 | 159 | 5411±137 | 0.030 |
|       |            | Trend |    |          | 0.093 |     |          | 0.222 |
| STAT4 | rs4853540  | GG    | 81 | 6616±176 |       | 188 | 5444±124 |       |
|       |            | GT    | 20 | 6115±172 | 0.609 | 40  | 5720±168 | 0.587 |
|       |            | TT    | 2  | 6350±354 | 0.433 | 2   | 6250±778 | 0.563 |
|       |            | TT+GT | 22 | 6136±164 | 0.572 | 42  | 5745±165 | 0.540 |
|       |            | Trend |    |          | 0.534 |     |          | 0.492 |
| STAT4 | rs3024861  | AA    | 29 | 7010±172 |       | 74  | 5595±120 |       |
|       |            | AT    | 32 | 6028±162 | 0.003 | 110 | 5365±134 | 0.106 |
|       |            | TT    | 29 | 6500±182 | 0.163 | 44  | 5645±150 | 0.855 |
|       |            | TT+AT | 61 | 6252±172 | 0.014 | 154 | 5445±139 | 0.257 |
|       |            | Trend |    |          | 0.160 |     |          | 0.904 |
| STAT4 | rs3024851  | AA    | 76 | 6624±173 |       | 184 | 5460±126 |       |
|       |            | AT    | 19 | 6158±176 | 0.517 | 24  | 5933±183 | 0.398 |
|       |            | TT    | 1  | 6600     | 0.939 | 2   | 6250±778 | 0.616 |
|       |            | TT+AT | 20 | 6180±171 | 0.522 | 26  | 5958±177 | 0.359 |
|       |            | Trend |    |          | 0.531 |     |          | 0.338 |
| STAT4 | rs10168266 | CC    | 46 | 6678±167 |       | 95  | 5704±129 |       |
|       |            | CT    | 49 | 6278±181 | 0.157 | 108 | 5287±129 | 0.080 |
|       |            | TT    | 8  | 7013±163 | 0.904 | 25  | 5728±150 | 0.645 |
|       |            | TT+CT | 57 | 6381±179 | 0.199 | 133 | 5370±134 | 0.189 |
|       |            | Trend |    |          | 0.404 |     |          | 0.679 |
| STAT4 | rs6434435  | GG    | 85 | 6495±175 |       | 196 | 5444±125 |       |
|       |            | AG    | 17 | 6706±172 | 0.400 | 31  | 5845±172 | 0.337 |
|       |            | AA    | 1  | 4800     | 0.024 | 3   | 5467±146 | 0.644 |
|       |            | AA+AG | 18 | 6600±173 | 0.459 | 34  | 5812±168 | 0.438 |
|       |            | Trend |    |          | 0.571 |     |          | 0.611 |
| STAT4 | rs11693480 | AA    | 27 | 6926±174 |       | 65  | 5578±131 |       |
|       |            | AC    | 54 | 6359±181 | 0.168 | 122 | 5445±132 | 0.417 |
|       |            | CC    | 22 | 6386±154 | 0.201 | 43  | 5530±140 | 0.683 |
|       |            | CC+AC | 76 | 6367±172 | 0.130 | 165 | 5467±133 | 0.446 |
|       |            | Trend |    |          | 0.180 |     |          | 0.618 |
| STAT4 | rs7574865  | GG    | 64 | 6655±172 |       | 100 | 5580±131 |       |
|       |            | GT    | 28 | 6143±197 | 0.117 | 101 | 5380±129 | 0.425 |
|       |            | TT    | 10 | 6570±110 | 0.428 | 28  | 5679±152 | 0.604 |
|       |            | TT+GT | 38 | 6255±178 | 0.106 | 129 | 5445±134 | 0.643 |
|       |            | Trend |    |          | 0.132 |     |          | 0.939 |
| STAT4 | rs16833260 | CC    | 29 | 6962±172 |       | 69  | 5535±130 |       |
|       |            | CG    | 50 | 6342±183 | 0.067 | 111 | 5432±135 | 0.406 |
|       |            | GG    | 24 | 6329±151 | 0.115 | 50  | 5596±133 | 0.754 |
|       |            | GG+CG | 74 | 6338±172 | 0.050 | 161 | 5483±134 | 0.633 |
|       |            | Trend |    |          | 0.098 |     |          | 0.842 |
| STAT4 | rs6752770  | AA    | 54 | 6513±179 |       | 124 | 5657±135 |       |
|       |            | AG    | 35 | 6723±165 | 0.676 | 82  | 5352±126 | 0.065 |
|       |            | GG    | 14 | 5993±174 | 0.283 | 23  | 5152±135 | 0.060 |

|        |            |       |    |          |       |     |          |       |
|--------|------------|-------|----|----------|-------|-----|----------|-------|
|        |            | GG+AG | 49 | 6514±169 | 0.871 | 105 | 5309±128 | 0.023 |
|        |            | Trend |    |          | 0.477 |     |          | 0.019 |
| STAT4  | rs1551443  | CC    | 53 | 6649±186 |       | 111 | 5638±138 |       |
|        |            | CT    | 45 | 6393±167 | 0.290 | 102 | 5437±123 | 0.370 |
|        |            | TT    | 5  | 6160±945 | 0.818 | 17  | 4959±144 | 0.060 |
|        |            | TT+CT | 50 | 6370±160 | 0.292 | 119 | 5369±127 | 0.173 |
|        |            | Trend |    |          | 0.339 |     |          | 0.068 |
| STAT4  | rs10189819 | TT    | 84 | 6443±170 |       | 182 | 5490±129 |       |
|        |            | CT    | 16 | 7056±192 | 0.406 | 45  | 5460±137 | 0.351 |
|        |            | CC    | 3  | 5600±156 | 0.072 |     |          |       |
|        |            | CC+CT | 19 | 6826±191 | 0.719 | 45  | 5460±137 | 0.351 |
|        |            | Trend |    |          | 0.897 |     |          | 0.351 |
| STAT4  | rs11685878 | CC    | 28 | 6889±205 |       | 68  | 5606±153 |       |
|        |            | CT    | 51 | 6243±158 | 0.181 | 121 | 5532±123 | 0.822 |
|        |            | TT    | 24 | 6650±162 | 0.568 | 40  | 5245±123 | 0.258 |
|        |            | TT+CT | 75 | 6373±160 | 0.239 | 161 | 5461±124 | 0.835 |
|        |            | Trend |    |          | 0.521 |     |          | 0.352 |
| STAT4  | rs1031509  | GG    | 44 | 6323±197 |       | 116 | 5423±136 |       |
|        |            | GT    | 49 | 6665±156 | 0.319 | 86  | 5640±132 | 0.089 |
|        |            | TT    | 10 | 6610±151 | 0.398 | 28  | 5379±120 | 0.762 |
|        |            | TT+GT | 59 | 6656±154 | 0.274 | 114 | 5575±129 | 0.136 |
|        |            | Trend |    |          | 0.276 |     |          | 0.313 |
| STAT4  | rs12327969 | GG    | 44 | 6323±197 |       | 115 | 5443±137 |       |
|        |            | CG    | 49 | 6665±156 | 0.319 | 87  | 5611±131 | 0.134 |
|        |            | CC    | 10 | 6610±151 | 0.398 | 28  | 5379±120 | 0.795 |
|        |            | CC+CG | 59 | 6656±154 | 0.274 | 115 | 5555±128 | 0.191 |
|        |            | Trend |    |          | 0.276 |     |          | 0.379 |
| STAT4  | rs16833437 | TT    | 26 | 6735±158 |       | 59  | 5269±120 |       |
|        |            | GT    | 51 | 6325±156 | 0.344 | 108 | 5535±126 | 0.288 |
|        |            | GG    | 26 | 6662±219 | 0.807 | 62  | 5673±153 | 0.323 |
|        |            | GG+GT | 77 | 6439±179 | 0.451 | 170 | 5585±136 | 0.236 |
|        |            | Trend |    |          | 0.806 |     |          | 0.325 |
| STAT4  | rs1031507  | AA    | 27 | 6741±155 |       | 59  | 5269±120 |       |
|        |            | AC    | 50 | 6314±157 | 0.330 | 108 | 5535±126 | 0.288 |
|        |            | CC    | 26 | 6662±219 | 0.812 | 62  | 5673±153 | 0.323 |
|        |            | CC+AC | 76 | 6433±180 | 0.440 | 170 | 5585±136 | 0.236 |
|        |            | Trend |    |          | 0.800 |     |          | 0.325 |
| STAT4  | rs13022931 | AA    | 72 | 6526±180 |       | 164 | 5615±138 |       |
|        |            | AG    | 27 | 6559±170 | 0.585 | 58  | 5260±115 | 0.031 |
|        |            | GG    | 4  | 5975±772 | 0.324 | 7   | 4929±989 | 0.065 |
|        |            | GG+AG | 31 | 6484±161 | 0.506 | 65  | 5225±113 | 0.014 |
|        |            | Trend |    |          | 0.424 |     |          | 0.008 |
| STAT2  | rs2066808  | AA    | 98 | 6543±177 |       | 212 | 5493±133 |       |
|        |            | AG    | 5  | 5940±462 | 0.127 | 18  | 5561±137 | 0.885 |
| STAT5A | rs16967637 | CC    | 61 | 6559±187 |       | 151 | 5572±142 |       |
|        |            | AC    | 39 | 6379±149 | 0.474 | 68  | 5357±117 | 0.705 |
|        |            | AA    | 3  | 7333±231 | 0.311 | 10  | 5480±760 | 0.722 |
|        |            | AA+AC | 42 | 6448±155 | 0.635 | 78  | 5373±112 | 0.756 |
|        |            | Trend |    |          | 0.942 |     |          | 0.831 |

|        |            |       |    |          |        |     |          |       |
|--------|------------|-------|----|----------|--------|-----|----------|-------|
| STAT5A | rs12601982 | AA    | 39 | 6185±184 |        | 120 | 5501±141 |       |
|        |            | AG    | 43 | 6598±174 | 0.253  | 92  | 5547±131 | 0.590 |
|        |            | GG    | 12 | 6617±159 | 0.650  | 17  | 5294±781 | 0.646 |
|        |            | GG+AG | 55 | 6602±170 | 0.268  | 109 | 5507±124 | 0.682 |
|        |            | Trend |    |          | 0.376  |     |          | 0.845 |
| STAT3  | rs2293152  | CC    | 35 | 6611±191 |        | 63  | 5657±121 |       |
|        |            | CG    | 44 | 6439±180 | 0.468  | 112 | 5455±124 | 0.348 |
|        |            | GG    | 24 | 6508±138 | 0.754  | 54  | 5426±161 | 0.271 |
|        |            | GG+CG | 68 | 6463±165 | 0.519  | 166 | 5446±137 | 0.248 |
|        |            | Trend |    |          | 0.695  |     |          | 0.266 |
| STAT3  | rs7217655  | CC    | 41 | 6605±189 |        | 98  | 5543±145 |       |
|        |            | CT    | 52 | 6346±163 | 0.528  | 104 | 5485±132 | 0.990 |
|        |            | TT    | 10 | 7010±169 | 0.557  | 27  | 5381±855 | 0.575 |
|        |            | TT+CT | 62 | 6453±164 | 0.671  | 131 | 5463±123 | 0.883 |
|        |            | Trend |    |          | 0.997  |     |          | 0.726 |
| STAT3  | rs6503695  | TT    | 42 | 6431±193 |        | 103 | 5522±143 |       |
|        |            | CT    | 52 | 6525±160 | 0.684  | 103 | 5537±132 | 0.918 |
|        |            | CC    | 9  | 6833±169 | 0.354  | 24  | 5233±769 | 0.172 |
|        |            | CC+CT | 61 | 6570±160 | 0.562  | 127 | 5480±124 | 0.842 |
|        |            | Trend |    |          | 0.414  |     |          | 0.489 |
| STAT3  | rs17593222 | CC    | 99 | 6549±172 |        | 221 | 5498±134 |       |
|        |            | CG    | 4  | 5625±215 | <0.001 | 8   | 5663±107 | 0.158 |
| STAT3  | rs3785898  | CC    | 42 | 6431±193 |        | 103 | 5522±143 |       |
|        |            | AC    | 52 | 6525±160 | 0.684  | 103 | 5537±132 | 0.918 |
|        |            | AA    | 9  | 6833±169 | 0.354  | 24  | 5233±769 | 0.172 |
|        |            | AA+AC | 61 | 6570±160 | 0.562  | 127 | 5480±124 | 0.842 |
|        |            | Trend |    |          | 0.414  |     |          | 0.489 |
| STAT3  | rs12949918 | TT    | 39 | 6569±193 |        | 98  | 5543±145 |       |
|        |            | CT    | 54 | 6381±161 | 0.592  | 105 | 5488±131 | 0.988 |
|        |            | CC    | 10 | 7010±169 | 0.548  | 27  | 5381±855 | 0.575 |
|        |            | CC+CT | 64 | 6480±163 | 0.731  | 132 | 5466±123 | 0.882 |
|        |            | Trend |    |          | 0.947  |     |          | 0.725 |
| STAT5B | rs9900213  | GG    | 56 | 6329±183 |        | 134 | 5428±141 |       |
|        |            | GT    | 37 | 6697±162 | 0.233  | 88  | 5610±124 | 0.178 |
|        |            | TT    | 9  | 6656±164 | 0.634  | 8   | 5450±590 | 0.448 |
|        |            | TT+GT | 46 | 6689±160 | 0.228  | 96  | 5597±120 | 0.171 |
|        |            | Trend |    |          | 0.286  |     |          | 0.171 |
| STAT5B | rs6503691  | CC    | 64 | 6370±178 |        | 138 | 5411±140 |       |
|        |            | CT    | 31 | 6713±170 | 0.222  | 83  | 5664±124 | 0.103 |
|        |            | TT    | 8  | 6888±159 | 0.315  | 8   | 5450±590 | 0.333 |
|        |            | TT+CT | 39 | 6749±166 | 0.160  | 91  | 5645±119 | 0.097 |
|        |            | Trend |    |          | 0.140  |     |          | 0.094 |
| NAB2   | rs324020   | AA    | 46 | 6615±183 |        | 113 | 5495±127 |       |
|        |            | AC    | 49 | 6306±159 | 0.442  | 95  | 5557±140 | 0.806 |
|        |            | CC    | 8  | 7200±206 | 0.420  | 21  | 5314±134 | 0.794 |
|        |            | CC+AC | 57 | 6432±167 | 0.702  | 116 | 5513±138 | 0.890 |
|        |            | Trend |    |          | 0.879  |     |          | 0.965 |
| STAT6  | rs703817   | CC    | 50 | 6458±174 |        | 134 | 5559±129 |       |
|        |            | CT    | 48 | 6508±172 | 0.994  | 81  | 5506±143 | 0.867 |

|        |            |       |    |          |       |     |          |       |
|--------|------------|-------|----|----------|-------|-----|----------|-------|
|        |            | TT    | 5  | 7120±213 | 0.214 | 14  | 4964±921 | 0.290 |
|        |            | TT+CT | 53 | 6566±175 | 0.771 | 95  | 5426±137 | 0.913 |
|        |            | Trend |    |          | 0.500 |     |          | 0.616 |
| STAT6  | rs324015   | CC    | 26 | 6854±177 |       | 74  | 5589±130 |       |
|        |            | CT    | 52 | 6206±149 | 0.070 | 119 | 5453±141 | 0.558 |
|        |            | TT    | 25 | 6800±210 | 0.760 | 36  | 5497±111 | 0.909 |
|        |            | TT+CT | 77 | 6399±172 | 0.176 | 155 | 5463±134 | 0.607 |
|        |            | Trend |    |          | 0.722 |     |          | 0.783 |
| STAT6  | rs3024974  | GG    | 71 | 6630±180 |       | 128 | 5393±128 |       |
|        |            | AG    | 30 | 6193±154 | 0.260 | 92  | 5617±139 | 0.365 |
|        |            | AA    | 2  | 7200±240 | 0.937 | 9   | 5756±130 | 0.334 |
|        |            | AA+AG | 32 | 6256±157 | 0.275 | 101 | 5630±138 | 0.297 |
|        |            | Trend |    |          | 0.307 |     |          | 0.245 |
| STAT6  | rs3024971  | TT    | 95 | 6514±176 |       | 196 | 5496±133 |       |
|        |            | GT    | 8  | 6513±148 | 0.347 | 31  | 5423±127 | 0.176 |
|        |            | GG    |    |          |       | 3   | 6433±171 | 0.040 |
|        |            | GG+GT | 8  | 6513±148 | 0.347 | 34  | 5512±132 | 0.367 |
|        |            | Trend |    |          | 0.347 |     |          | 0.692 |
| STAT6  | rs167769   | CC    | 51 | 6625±180 |       | 135 | 5508±131 |       |
|        |            | CT    | 47 | 6519±169 | 0.697 | 83  | 5611±138 | 0.287 |
|        |            | TT    | 5  | 5320±135 | 0.052 | 11  | 4645±706 | 0.027 |
|        |            | TT+CT | 52 | 6404±169 | 0.431 | 94  | 5498±135 | 0.559 |
|        |            | Trend |    |          | 0.192 |     |          | 0.861 |
| STAT6  | rs324013   | CC    | 42 | 6743±179 |       | 83  | 5548±130 |       |
|        |            | CT    | 46 | 6276±164 | 0.200 | 111 | 5509±138 | 0.643 |
|        |            | TT    | 15 | 6600±190 | 0.627 | 35  | 5383±124 | 0.413 |
|        |            | TT+CT | 61 | 6356±170 | 0.218 | 146 | 5479±134 | 0.518 |
|        |            | Trend |    |          | 0.383 |     |          | 0.409 |
| STAT6  | rs11172106 | CC    | 49 | 6588±179 |       | 104 | 5513±130 |       |
|        |            | CG    | 44 | 6427±164 | 0.752 | 102 | 5536±138 | 0.936 |
|        |            | GG    | 10 | 6530±203 | 0.514 | 23  | 5322±126 | 0.722 |
|        |            | GG+CG | 54 | 6446±170 | 0.599 | 125 | 5497±136 | 0.975 |
|        |            | Trend |    |          | 0.505 |     |          | 0.834 |
| TICAM1 | rs11667699 | GG    | 84 | 6554±176 |       | 174 | 5528±133 |       |
|        |            | AG    | 16 | 6250±174 | 0.838 | 51  | 5461±129 | 0.747 |
|        |            | AA    | 2  | 7300±169 | 0.453 | 5   | 4880±164 | 0.297 |
|        |            | AA+AG | 18 | 6367±172 | 0.976 | 56  | 5409±132 | 0.570 |
|        |            | Trend |    |          | 0.788 |     |          | 0.420 |
| TICAM1 | rs11085101 | AA    | 33 | 6791±149 |       | 79  | 5729±142 |       |
|        |            | AG    | 56 | 6498±188 | 0.105 | 110 | 5376±128 | 0.037 |
|        |            | GG    | 14 | 5921±165 | 0.017 | 41  | 5383±124 | 0.194 |
|        |            | GG+AG | 70 | 6383±183 | 0.037 | 151 | 5378±126 | 0.035 |
|        |            | Trend |    |          | 0.012 |     |          | 0.102 |
| TICAM1 | rs1107009  | CC    | 30 | 6423±173 |       | 73  | 5310±123 |       |
|        |            | CG    | 48 | 6475±186 | 0.631 | 91  | 5500±129 | 0.534 |
|        |            | GG    | 25 | 6696±155 | 0.130 | 64  | 5750±145 | 0.059 |
|        |            | GG+CG | 73 | 6551±175 | 0.335 | 155 | 5603±136 | 0.170 |
|        |            | Trend |    |          | 0.138 |     |          | 0.061 |
| TICAM1 | rs1046673  | GG    | 83 | 6463±177 |       | 179 | 5543±131 |       |

|               |            |       |    |          |       |     |          |       |
|---------------|------------|-------|----|----------|-------|-----|----------|-------|
|               |            | AG    | 19 | 6753±163 | 0.192 | 46  | 5346±136 | 0.384 |
|               |            | AA    | 1  | 6200     | 0.319 | 4   | 5525±177 | 0.852 |
|               |            | AA+AG | 20 | 6725±159 | 0.183 | 50  | 5360±138 | 0.381 |
|               |            | Trend |    |          | 0.180 |     |          | 0.432 |
| <i>TICAM1</i> | rs4807650  | TT    | 26 | 6950±156 |       | 61  | 5598±122 |       |
|               |            | CT    | 60 | 6387±175 | 0.024 | 127 | 5469±141 | 0.085 |
|               |            | CC    | 17 | 6294±192 | 0.036 | 42  | 5445±124 | 0.326 |
|               |            | CC+CT | 77 | 6366±178 | 0.013 | 169 | 5463±136 | 0.091 |
|               |            | Trend |    |          | 0.026 |     |          | 0.242 |
| <i>TICAM1</i> | rs4807651  | AA    | 29 | 6707±178 |       | 69  | 5310±126 |       |
|               |            | AG    | 55 | 6291±182 | 0.433 | 127 | 5520±140 | 0.559 |
|               |            | GG    | 19 | 6863±137 | 0.247 | 34  | 5803±112 | 0.008 |
|               |            | GG+AG | 74 | 6438±172 | 0.774 | 161 | 5580±135 | 0.238 |
|               |            | Trend |    |          | 0.413 |     |          | 0.026 |
| <i>TICAM1</i> | rs11667267 | AA    | 31 | 6884±149 |       | 65  | 5591±123 |       |
|               |            | AG    | 57 | 6375±181 | 0.029 | 130 | 5477±139 | 0.136 |
|               |            | GG    | 15 | 6273±190 | 0.033 | 34  | 5412±129 | 0.343 |
|               |            | GG+AG | 72 | 6354±182 | 0.013 | 164 | 5463±137 | 0.124 |
|               |            | Trend |    |          | 0.016 |     |          | 0.222 |
| <i>TLR10</i>  | rs4513579  | CC    | 24 | 6250±151 |       | 73  | 5548±152 |       |
|               |            | CT    | 55 | 6556±189 | 0.454 | 128 | 5596±124 | 0.993 |
|               |            | TT    | 24 | 6679±161 | 0.243 | 29  | 4945±106 | 0.006 |
|               |            | TT+CT | 79 | 6594±180 | 0.328 | 157 | 5476±123 | 0.475 |
|               |            | Trend |    |          | 0.244 |     |          | 0.042 |
| <i>TLR10</i>  | rs10856839 | TT    | 68 | 6437±172 |       | 150 | 5503±138 |       |
|               |            | GT    | 33 | 6691±184 | 0.354 | 72  | 5486±128 | 0.840 |
|               |            | GG    | 2  | 6200±0   | 0.919 | 8   | 5538±705 | 0.065 |
|               |            | GG+GT | 35 | 6663±178 | 0.364 | 80  | 5491±123 | 0.896 |
|               |            | Trend |    |          | 0.386 |     |          | 0.574 |
| <i>TLR10</i>  | rs7653908  | GG    | 42 | 6640±169 |       | 53  | 5202±119 |       |
|               |            | CG    | 44 | 6564±181 | 0.966 | 121 | 5562±124 | 0.051 |
|               |            | CC    | 16 | 5938±163 | 0.144 | 55  | 5640±160 | 0.062 |
|               |            | CC+CG | 60 | 6397±177 | 0.495 | 176 | 5586±136 | 0.032 |
|               |            | Trend |    |          | 0.223 |     |          | 0.064 |
| <i>TLR1</i>   | rs3924112  | TT    | 22 | 6209±159 |       | 65  | 5620±152 |       |
|               |            | CT    | 55 | 6547±184 | 0.565 | 126 | 5588±128 | 0.722 |
|               |            | CC    | 26 | 6700±166 | 0.258 | 39  | 5008±103 | 0.011 |
|               |            | CC+CT | 81 | 6596±177 | 0.393 | 165 | 5451±125 | 0.271 |
|               |            | Trend |    |          | 0.255 |     |          | 0.022 |
| <i>TLR6</i>   | rs1039559  | AA    | 60 | 6365±166 |       | 146 | 5437±141 |       |
|               |            | AG    | 38 | 6782±187 | 0.342 | 73  | 5574±116 | 0.264 |
|               |            | GG    | 5  | 6260±170 | 0.191 | 11  | 5818±129 | 0.889 |
|               |            | GG+AG | 43 | 6721±184 | 0.512 | 84  | 5606±117 | 0.323 |
|               |            | Trend |    |          | 0.890 |     |          | 0.457 |
| <i>TLR6</i>   | rs5743794  | CC    | 37 | 6646±188 |       | 47  | 5360±119 |       |
|               |            | CT    | 51 | 6469±170 | 0.851 | 126 | 5502±131 | 0.528 |
|               |            | TT    | 15 | 6340±157 | 0.549 | 56  | 5604±149 | 0.294 |
|               |            | TT+CT | 66 | 6439±166 | 0.714 | 182 | 5533±136 | 0.397 |
|               |            | Trend |    |          | 0.581 |     |          | 0.294 |



|      |            |       |    |          |        |     |          |       |
|------|------------|-------|----|----------|--------|-----|----------|-------|
| TLR6 | rs6531670  | TT    | 45 | 6513±167 |        | 118 | 5653±136 |       |
|      |            | CT    | 45 | 6724±186 | 0.246  | 99  | 5384±125 | 0.325 |
|      |            | CC    | 13 | 5785±141 | 0.384  | 13  | 4969±144 | 0.098 |
|      |            | CC+CT | 58 | 6514±180 | 0.503  | 112 | 5336±128 | 0.165 |
|      |            | Trend |    |          | 0.842  |     |          | 0.081 |
| TLR2 | rs13150331 | AA    | 32 | 6778±191 |        | 67  | 5613±123 |       |
|      |            | AG    | 50 | 6084±139 | 0.136  | 116 | 5470±135 | 0.140 |
|      |            | GG    | 20 | 7125±205 | 0.727  | 45  | 5469±142 | 0.193 |
|      |            | GG+AG | 70 | 6381±166 | 0.334  | 161 | 5470±136 | 0.097 |
|      |            | Trend |    |          | 0.951  |     |          | 0.150 |
| TLR2 | rs3804100  | TT    | 48 | 6588±182 |        | 118 | 5558±139 |       |
|      |            | CT    | 47 | 6545±167 | 0.852  | 90  | 5443±125 | 0.428 |
|      |            | CC    | 8  | 5888±168 | 0.084  | 21  | 5457±131 | 0.661 |
|      |            | CC+CT | 55 | 6449±167 | 0.551  | 111 | 5446±126 | 0.597 |
|      |            | Trend |    |          | 0.236  |     |          | 0.901 |
| TLR2 | rs7656411  | GG    | 35 | 6140±149 |        | 59  | 5605±134 |       |
|      |            | GT    | 43 | 7040±180 | 0.003  | 121 | 5423±132 | 0.590 |
|      |            | TT    | 25 | 6132±178 | 0.678  | 49  | 5594±133 | 0.746 |
|      |            | TT+GT | 68 | 6706±183 | 0.031  | 170 | 5472±132 | 0.787 |
|      |            | Trend |    |          | 0.460  |     |          | 0.790 |
| TLR3 | rs956239   | CC    | 82 | 6684±176 |        | 159 | 5476±131 |       |
|      |            | CT    | 20 | 5900±153 | 0.146  | 60  | 5490±129 | 0.932 |
|      |            | TT    | 1  | 4800     | <0.001 | 9   | 5622±121 | 0.525 |
|      |            | TT+CT | 21 | 5848±151 | 0.100  | 69  | 5507±128 | 0.822 |
|      |            | Trend |    |          | 0.057  |     |          | 0.701 |
| TLR3 | rs4861699  | GG    | 43 | 6609±184 |        | 109 | 5442±120 |       |
|      |            | AG    | 51 | 6580±168 | 0.789  | 97  | 5558±141 | 0.605 |
|      |            | AA    | 8  | 5700±157 | 0.230  | 24  | 5517±154 | 0.841 |
|      |            | AA+AG | 59 | 6461±168 | 0.567  | 121 | 5550±143 | 0.611 |
|      |            | Trend |    |          | 0.342  |     |          | 0.688 |
| TLR3 | rs5743303  | AA    | 59 | 6427±161 |        | 163 | 5536±135 |       |
|      |            | AT    | 41 | 6607±195 | 0.588  | 60  | 5470±131 | 0.733 |
|      |            | TT    | 3  | 6933±138 | 0.526  | 7   | 4886±615 | 0.252 |
|      |            | TT+AT | 44 | 6630±190 | 0.534  | 67  | 5409±127 | 0.577 |
|      |            | Trend |    |          | 0.472  |     |          | 0.428 |
| TLR3 | rs5743305  | TT    | 59 | 6642±182 |        | 124 | 5531±134 |       |
|      |            | AT    | 39 | 6344±167 | 0.270  | 82  | 5494±139 | 0.983 |
|      |            | AA    | 5  | 6320±130 | 0.820  | 23  | 5391±101 | 0.834 |
|      |            | AA+AT | 44 | 6341±162 | 0.280  | 105 | 5471±131 | 0.937 |
|      |            | Trend |    |          | 0.336  |     |          | 0.882 |
| TLR3 | rs7657186  | GG    | 87 | 6537±175 |        | 186 | 5577±135 |       |
|      |            | AG    | 15 | 6393±178 | 0.609  | 34  | 5141±129 | 0.067 |
|      |            | AA    | 1  | 6300     | 0.568  | 10  | 5260±706 | 0.425 |
|      |            | AA+AG | 16 | 6388±172 | 0.596  | 44  | 5168±118 | 0.059 |
|      |            | Trend |    |          | 0.585  |     |          | 0.076 |
| TLR3 | rs13126816 | GG    | 82 | 6356±170 |        | 174 | 5542±139 |       |
|      |            | AG    | 17 | 7218±190 | 0.089  | 53  | 5349±111 | 0.430 |
|      |            | AA    | 4  | 6750±141 | 0.224  | 2   | 5550±176 | 0.885 |
|      |            | AA+AG | 21 | 7129±180 | 0.054  | 55  | 5356±111 | 0.445 |
|      |            |       |    |          |        |     |          |       |

|      |            |       |     |          |       |       |          |       |
|------|------------|-------|-----|----------|-------|-------|----------|-------|
|      |            | Trend |     |          | 0.055 |       |          | 0.472 |
| TLR3 | rs3775291  | CC    | 56  | 6438±170 |       | 120   | 5469±128 |       |
|      |            | CT    | 42  | 6495±175 | 0.802 | 92    | 5542±146 | 0.689 |
|      |            | TT    | 5   | 7520±211 | 0.083 | 18    | 5472±895 | 0.671 |
|      |            | TT+CT | 47  | 6604±179 | 0.807 | 110   | 5531±138 | 0.645 |
|      |            | Trend |     |          |       | 0.422 |          | 0.615 |
| TLR3 | rs4862633  | CC    | 83  | 6565±181 |       | 191   | 5554±136 |       |
|      |            | CT    | 19  | 6300±142 | 0.282 | 31    | 5261±123 | 0.441 |
|      |            | TT    | 1   | 6300     | 0.472 | 8     | 5088±681 | 0.146 |
|      |            | TT+CT | 20  | 6300±138 | 0.274 | 39    | 5226±114 | 0.279 |
|      |            | Trend |     |          |       | 0.272 |          | 0.184 |
| TLR3 | rs4608848  | TT    | 38  | 6424±183 |       | 100   | 5518±131 |       |
|      |            | CT    | 38  | 6884±180 | 0.813 | 91    | 5523±135 | 0.753 |
|      |            | CC    | 27  | 6119±145 | 0.081 | 37    | 5265±117 | 0.480 |
|      |            | CC+CT | 65  | 6566±169 | 0.525 | 128   | 5448±130 | 0.991 |
|      |            | Trend |     |          |       | 0.105 |          | 0.643 |
| TLR4 | rs10759930 | TT    | 35  | 6297±140 |       | 79    | 5480±140 |       |
|      |            | CT    | 49  | 6784±206 | 0.221 | 110   | 5430±119 | 0.637 |
|      |            | CC    | 19  | 6216±128 | 0.807 | 41    | 5720±154 | 0.383 |
|      |            | CC+CT | 68  | 6625±188 | 0.289 | 151   | 5509±129 | 0.483 |
|      |            | Trend |     |          |       | 0.591 |          | 0.386 |
| TLR4 | rs10759932 | TT    | 41  | 6302±143 |       | 108   | 5487±129 |       |
|      |            | CT    | 26  | 6238±185 | 0.788 | 90    | 5416±125 | 0.746 |
|      |            | CC    | 36  | 6953±192 | 0.060 | 32    | 5772±163 | 0.352 |
|      |            | CC+CT | 62  | 6653±191 | 0.298 | 122   | 5509±136 | 0.874 |
|      |            | Trend |     |          |       | 0.079 |          | 0.507 |
| TLR4 | rs2149356  | GG    | 40  | 6390±154 |       | 80    | 5489±139 |       |
|      |            | GT    | 46  | 6748±202 | 0.292 | 111   | 5409±118 | 0.697 |
|      |            | TT    | 17  | 6171±130 | 0.958 | 38    | 5774±159 | 0.434 |
|      |            | TT+GT | 63  | 6592±186 | 0.379 | 149   | 5502±130 | 0.546 |
|      |            | Trend |     |          |       | 0.673 |          | 0.441 |
| TLR4 | rs5030728  | GG    | 102 | 6526±174 |       | 226   | 5502±134 |       |
|      |            | AG    | 1   | 5200     | 0.048 | 4     | 5325±699 | 0.158 |
| TLR4 | rs11536889 | GG    | 66  | 6633±175 |       | 131   | 5444±139 |       |
|      |            | CG    | 33  | 6358±174 | 0.425 | 89    | 5563±125 | 0.301 |
|      |            | CC    | 4   | 5825±162 | 0.082 | 10    | 5650±126 | 0.472 |
|      |            | CC+CG | 37  | 6300±171 | 0.233 | 99    | 5572±124 | 0.263 |
|      |            | Trend |     |          |       | 0.124 |          | 0.253 |
| TLR4 | rs1927906  | TT    | 77  | 6464±168 |       | 201   | 5503±135 |       |
|      |            | CT    | 22  | 6459±182 | 0.852 | 29    | 5469±118 | 0.329 |
|      |            | CC    | 3   | 8300±258 | 0.061 |       |          |       |
|      |            | CC+CT | 25  | 6680±195 | 0.629 | 29    | 5469±118 | 0.329 |
|      |            | Trend |     |          |       | 0.303 |          | 0.329 |
| TLR4 | rs1554973  | TT    | 73  | 6501±168 |       | 175   | 5495±139 |       |
|      |            | CT    | 28  | 6461±191 | 0.877 | 49    | 5582±111 | 0.922 |
|      |            | CC    | 2   | 7700±155 | 0.108 | 6     | 4933±836 | 0.033 |
|      |            | CC+CT | 30  | 6543±189 | 0.661 | 55    | 5511±109 | 0.671 |
|      |            | Trend |     |          |       | 0.427 |          | 0.343 |
| TLR4 | rs7044464  | TT    | 93  | 6555±176 |       | 197   | 5511±137 |       |

|                 |            |       |     |          |        |     |          |       |
|-----------------|------------|-------|-----|----------|--------|-----|----------|-------|
|                 |            | AT    | 10  | 6130±154 | 0.557  | 30  | 5457±103 | 0.698 |
|                 |            | AA    |     |          |        | 1   | 5200     | 0.307 |
|                 |            | AA+AT | 10  | 6130±154 | 0.557  | 31  | 5448±102 | 0.681 |
|                 |            | Trend |     |          | 0.557  |     |          | 0.660 |
| <i>PTK9L</i>    | rs11717574 | TT    | 103 | 6514±174 |        | 225 | 5496±133 |       |
|                 |            | CT    |     |          |        | 5   | 5600±114 | 0.872 |
| <i>PTK9L</i>    | rs353547   | CC    | 44  | 6782±160 |        | 67  | 5510±148 |       |
|                 |            | CT    | 44  | 6161±186 | 0.049  | 119 | 5433±127 | 0.668 |
|                 |            | TT    | 15  | 6760±166 | 0.985  | 44  | 5659±124 | 0.430 |
|                 |            | TT+CT | 59  | 6314±182 | 0.116  | 163 | 5494±126 | 0.956 |
|                 |            | Trend |     |          | 0.444  |     |          | 0.536 |
| <i>TNFRSF18</i> | rs9729550  | CC    | 70  | 6481±178 |        | 158 | 5524±135 |       |
|                 |            | AC    | 31  | 6681±167 | 0.381  | 64  | 5478±131 | 0.969 |
|                 |            | AA    | 2   | 5050±106 | 0.219  | 5   | 5320±106 | 0.691 |
|                 |            | AA+AC | 33  | 6582±167 | 0.514  | 69  | 5467±129 | 0.977 |
|                 |            | Trend |     |          | 0.784  |     |          | 0.907 |
| <i>TNFSF18</i>  | rs975074   | AA    | 80  | 6465±177 |        | 214 | 5511±132 |       |
|                 |            | AC    | 23  | 6683±166 | 0.818  | 14  | 4986±926 | 0.144 |
| <i>TNFSF18</i>  | rs2236876  | AA    | 76  | 6580±178 |        | 154 | 5501±138 |       |
|                 |            | AG    | 22  | 6273±170 | 0.388  | 64  | 5359±108 | 0.701 |
|                 |            | GG    | 5   | 6560±140 | 0.246  | 11  | 5891±127 | 0.543 |
|                 |            | GG+AG | 27  | 6326±163 | 0.296  | 75  | 5437±111 | 0.867 |
|                 |            | Trend |     |          | 0.230  |     |          | 0.938 |
| <i>TNFSF18</i>  | rs723858   | AA    | 72  | 6586±179 |        | 148 | 5449±137 |       |
|                 |            | AT    | 29  | 6262±165 | 0.184  | 71  | 5541±125 | 0.485 |
|                 |            | TT    | 2   | 7550±354 | 0.367  | 11  | 5891±127 | 0.491 |
|                 |            | TT+AT | 31  | 6345±163 | 0.251  | 82  | 5588±125 | 0.412 |
|                 |            | Trend |     |          | 0.398  |     |          | 0.371 |
| <i>TNFSF18</i>  | rs7537126  | TT    | 85  | 6446±174 |        | 224 | 5464±131 |       |
|                 |            | CT    | 16  | 6850±178 | 0.684  | 6   | 6783±125 | 0.012 |
|                 |            | CC    | 1   | 7900     | 0.529  |     |          |       |
|                 |            | CC+CT | 17  | 6912±174 | 0.665  | 6   | 6783±125 | 0.012 |
|                 |            | Trend |     |          | 0.642  |     |          | 0.012 |
| <i>TNFSF9</i>   | rs12151125 | TT    | 58  | 6410±160 |        | 120 | 5329±113 |       |
|                 |            | GT    | 34  | 6347±188 | 0.977  | 88  | 5709±154 | 0.530 |
|                 |            | GG    | 11  | 7573±177 | 0.048  | 20  | 5365±102 | 0.791 |
|                 |            | GG+GT | 45  | 6647±191 | 0.447  | 108 | 5645±146 | 0.633 |
|                 |            | Trend |     |          | 0.143  |     |          | 0.858 |
| <i>TNFSF9</i>   | rs348337   | CC    | 67  | 6457±170 |        | 130 | 5398±119 |       |
|                 |            | CT    | 34  | 6429±169 | 0.764  | 81  | 5665±156 | 0.947 |
|                 |            | TT    | 2   | 9850±212 | <0.001 | 19  | 5479±109 | 0.703 |
|                 |            | TT+CT | 36  | 6619±182 | 0.453  | 100 | 5630±148 | 0.858 |
|                 |            | Trend |     |          | 0.183  |     |          | 0.760 |
| <i>TNFSF9</i>   | rs348390   | AA    | 68  | 6491±169 |        | 146 | 5613±136 |       |
|                 |            | AG    | 33  | 6461±181 | 0.754  | 74  | 5318±127 | 0.023 |
|                 |            | GG    | 2   | 8150±261 | 0.243  | 10  | 5170±118 | 0.446 |
|                 |            | GG+AG | 35  | 6557±185 | 0.960  | 84  | 5300±125 | 0.022 |
|                 |            | Trend |     |          | 0.752  |     |          | 0.053 |
| <i>TOLLIP</i>   | rs3750919  | GG    | 46  | 6546±184 |        | 119 | 5592±136 |       |

|               |            |       |    |          |       |     |          |       |
|---------------|------------|-------|----|----------|-------|-----|----------|-------|
|               |            | AG    | 49 | 6512±174 | 0.600 | 95  | 5454±130 | 0.193 |
|               |            | AA    | 8  | 6338±121 | 0.772 | 16  | 5075±122 | 0.036 |
|               |            | AA+AG | 57 | 6488±167 | 0.589 | 111 | 5399±129 | 0.081 |
|               |            | Trend |    |          | 0.616 |     |          | 0.029 |
| <i>TOLLIP</i> | rs3829223  | CC    | 44 | 6366±160 |       | 90  | 5340±139 |       |
|               |            | CT    | 49 | 6512±176 | 0.868 | 104 | 5548±118 | 0.451 |
|               |            | TT    | 10 | 7170±219 | 0.320 | 35  | 5789±154 | 0.251 |
|               |            | TT+CT | 59 | 6624±184 | 0.691 | 139 | 5609±128 | 0.302 |
|               |            | Trend |    |          | 0.470 |     |          | 0.229 |
| <i>TOLLIP</i> | rs3793964  | CC    | 44 | 6702±185 |       | 62  | 5644±139 |       |
|               |            | CT    | 39 | 6308±170 | 0.595 | 100 | 5523±122 | 0.635 |
|               |            | TT    | 20 | 6500±157 | 0.859 | 67  | 5324±143 | 0.178 |
|               |            | TT+CT | 59 | 6373±165 | 0.743 | 167 | 5443±131 | 0.357 |
|               |            | Trend |    |          | 0.984 |     |          | 0.175 |
| <i>TOLLIP</i> | rs11042484 | GG    | 83 | 6560±176 |       | 196 | 5490±135 |       |
|               |            | AG    | 18 | 6339±168 | 0.420 | 33  | 5536±122 | 0.355 |
|               |            | AA    | 2  | 6150±233 | 0.727 |     |          |       |
|               |            | AA+AG | 20 | 6320±168 | 0.386 | 33  | 5536±122 | 0.355 |
|               |            | Trend |    |          | 0.403 |     |          | 0.355 |
| <i>TOLLIP</i> | rs5743899  | TT    | 48 | 6575±184 |       | 105 | 5620±139 |       |
|               |            | CT    | 49 | 6518±169 | 0.970 | 99  | 5339±117 | 0.343 |
|               |            | CC    | 6  | 5983±139 | 0.589 | 26  | 5615±159 | 0.517 |
|               |            | CC+CT | 55 | 6460±166 | 0.895 | 125 | 5397±126 | 0.565 |
|               |            | Trend |    |          | 0.768 |     |          | 0.988 |
| <i>TOLLIP</i> | rs5743867  | AA    | 50 | 6484±186 |       | 112 | 5619±137 |       |
|               |            | AG    | 47 | 6613±166 | 0.703 | 92  | 5324±117 | 0.312 |
|               |            | GG    | 6  | 5983±139 | 0.665 | 25  | 5652±162 | 0.453 |
|               |            | GG+AG | 53 | 6542±163 | 0.791 | 117 | 5394±128 | 0.558 |
|               |            | Trend |    |          | 0.957 |     |          | 0.965 |
| <i>TRAM1</i>  | rs2622653  | GG    | 58 | 6538±185 |       | 111 | 5378±123 |       |
|               |            | AG    | 36 | 6186±149 | 0.242 | 96  | 5644±151 | 0.681 |
|               |            | AA    | 8  | 7425±146 | 0.062 | 22  | 5527±857 | 0.690 |
|               |            | AA+AG | 44 | 6411±154 | 0.574 | 118 | 5622±141 | 0.643 |
|               |            | Trend |    |          | 0.787 |     |          | 0.623 |
| <i>TRAM1</i>  | rs268626   | GG    | 58 | 6538±185 |       | 111 | 5401±124 |       |
|               |            | AG    | 37 | 6197±147 | 0.292 | 96  | 5591±148 | 0.995 |
|               |            | AA    | 8  | 7800±159 | 0.026 | 22  | 5645±105 | 0.659 |
|               |            | AA+AG | 45 | 6482±160 | 0.765 | 118 | 5601±140 | 0.897 |
|               |            | Trend |    |          | 0.514 |     |          | 0.766 |
| <i>TRAM1</i>  | rs268593   | TT    | 48 | 6631±186 |       | 90  | 5328±122 |       |
|               |            | CT    | 39 | 6192±166 | 0.240 | 106 | 5648±147 | 0.618 |
|               |            | CC    | 16 | 6944±147 | 0.303 | 33  | 5521±108 | 0.638 |
|               |            | CC+CT | 55 | 6411±163 | 0.574 | 139 | 5618±138 | 0.576 |
|               |            | Trend |    |          | 0.757 |     |          | 0.582 |
| <i>TRAM1</i>  | rs268594   | CC    | 73 | 6526±180 |       | 110 | 5405±127 |       |
|               |            | CT    | 22 | 5986±134 | 0.110 | 93  | 5535±141 | 0.848 |
|               |            | TT    | 8  | 7850±154 | 0.004 | 24  | 5650±100 | 0.489 |
|               |            | TT+CT | 30 | 6483±161 | 0.736 | 117 | 5559±134 | 0.972 |
|               |            | Trend |    |          | 0.407 |     |          | 0.715 |

|              |            |       |     |          |       |     |          |        |
|--------------|------------|-------|-----|----------|-------|-----|----------|--------|
| <i>TRAM1</i> | rs13271014 | AA    | 102 | 6513±174 |       | 225 | 5488±134 |        |
|              |            | AG    | 1   | 6600     | 0.051 | 4   | 5488±134 | <0.001 |
|              |            | GG    |     |          |       |     |          |        |
|              |            | GG+   | 1   | 6600     | 0.051 | 4   | 6025±580 | <0.001 |
|              |            | Trend |     |          | 0.051 |     |          | <0.001 |
| <i>TSLP</i>  | rs764916   | GG    | 58  | 6695±174 |       | 90  | 5424±113 |        |
|              |            | CG    | 33  | 6124±166 | 0.204 | 104 | 5481±140 | 0.697  |
|              |            | CC    | 12  | 6708±191 | 0.893 | 35  | 5623±141 | 0.993  |
|              |            | CC+CG | 45  | 6280±172 | 0.335 | 139 | 5517±140 | 0.750  |
|              |            | Trend |     |          | 0.660 |     |          | 0.887  |
| <i>TSLP</i>  | rs764917   | AA    | 48  | 6267±165 |       | 117 | 5364±128 |        |
|              |            | AC    | 38  | 6729±194 | 0.446 | 93  | 5676±135 | 0.010  |
|              |            | CC    | 16  | 6694±152 | 0.890 | 17  | 5294±110 | 0.923  |
|              |            | CC+AC | 54  | 6719±181 | 0.504 | 110 | 5617±132 | 0.021  |
|              |            | Trend |     |          | 0.720 |     |          | 0.105  |
| <i>TSLP</i>  | rs1837253  | TT    | 37  | 6470±162 |       | 90  | 5537±125 |        |
|              |            | CT    | 35  | 6509±195 | 0.892 | 99  | 5466±134 | 0.711  |
|              |            | CC    | 30  | 6613±168 | 0.785 | 39  | 5379±136 | 0.545  |
|              |            | CC+CT | 65  | 6557±182 | 0.822 | 138 | 5441±134 | 0.586  |
|              |            | Trend |     |          | 0.785 |     |          | 0.531  |
| <i>TSLP</i>  | rs1898671  | CC    | 92  | 6457±177 |       | 209 | 5532±135 |        |
|              |            | CT    | 10  | 6960±148 | 0.137 | 20  | 5165±107 | 0.276  |
|              |            | TT    |     |          |       | 1   | 5200     | 0.385  |
|              |            | TT+CT | 10  | 6960±148 | 0.137 | 21  | 5167±104 | 0.267  |
|              |            | Trend |     |          | 0.137 |     |          | 0.259  |
| <i>TSLP</i>  | rs11466741 | CC    | 60  | 6352±157 |       | 123 | 5381±118 |        |
|              |            | CT    | 36  | 6939±198 | 0.193 | 96  | 5595±150 | 0.274  |
|              |            | TT    | 7   | 5714±147 | 0.024 | 11  | 5973±122 | 0.263  |
|              |            | TT+CT | 43  | 6740±194 | 0.534 | 107 | 5634±147 | 0.198  |
|              |            | Trend |     |          | 0.724 |     |          | 0.154  |
| <i>TSLP</i>  | rs2289277  | CC    | 48  | 6265±161 |       | 89  | 5487±118 |        |
|              |            | CG    | 43  | 6823±176 | 0.147 | 118 | 5500±145 | 0.991  |
|              |            | GG    | 12  | 6400±209 | 0.485 | 22  | 5527±124 | 0.985  |
|              |            | GG+CG | 55  | 6731±183 | 0.403 | 140 | 5504±142 | 0.988  |
|              |            | Trend |     |          | 0.973 |     |          | 0.985  |
| <i>TSLP</i>  | rs2289278  | CC    | 70  | 6624±193 |       | 141 | 5542±140 |        |
|              |            | CG    | 24  | 6333±108 | 0.985 | 83  | 5401±120 | 0.608  |
|              |            | GG    | 9   | 6133±157 | 0.543 | 5   | 6140±106 | 0.245  |
|              |            | GG+CG | 33  | 6279±121 | 0.803 | 88  | 5443±120 | 0.755  |
|              |            | Trend |     |          | 0.665 |     |          | 0.971  |
| <i>TSLP</i>  | rs11466749 | AA    | 86  | 6445±172 |       | 192 | 5579±134 |        |
|              |            | AG    | 17  | 6859±181 | 0.534 | 36  | 5086±117 | 0.126  |
|              |            | GG    |     |          |       | 2   | 5250±162 | <0.001 |
|              |            | GG+AG | 17  | 6859±181 | 0.534 | 38  | 5095±117 | 0.079  |
|              |            | Trend |     |          | 0.534 |     |          | 0.043  |
| <i>TSLP</i>  | rs11466750 | GG    | 86  | 6445±172 |       | 190 | 5584±135 |        |
|              |            | AG    | 17  | 6859±181 | 0.534 | 36  | 5086±117 | 0.125  |
|              |            | AA    |     |          |       | 2   | 5250±162 | <0.001 |
|              |            | AA+AG | 17  | 6859±181 | 0.534 | 38  | 5095±117 | 0.078  |

|       |           |       |    |          |       |     |          |        |
|-------|-----------|-------|----|----------|-------|-----|----------|--------|
|       |           | Trend |    |          | 0.534 |     |          | 0.042  |
| VCAM1 | rs1582091 | GG    | 30 | 6403±143 |       | 90  | 5738±140 |        |
|       |           | GT    | 57 | 6656±191 | 0.342 | 107 | 5407±129 | 0.104  |
|       |           | TT    | 16 | 6213±165 | 0.631 | 32  | 5172±115 | 0.025  |
|       |           | TT+GT | 73 | 6559±185 | 0.539 | 139 | 5353±126 | 0.046  |
|       |           | Trend |    |          | 0.855 |     |          | 0.019  |
| VCAM1 | rs1041163 | TT    | 73 | 6512±154 |       | 163 | 5667±130 |        |
|       |           | CT    | 26 | 6804±214 | 0.612 | 62  | 5127±134 | 0.011  |
|       |           | CC    | 4  | 4650±145 | 0.025 | 5   | 4620±646 | 0.004  |
|       |           | CC+CT | 30 | 6517±217 | 0.887 | 67  | 5090±131 | 0.004  |
|       |           | Trend |    |          | 0.379 |     |          | 0.001  |
| VCAM1 | rs3176860 | AA    | 34 | 6403±140 |       | 103 | 5693±136 |        |
|       |           | AG    | 53 | 6675±196 | 0.359 | 95  | 5446±137 | 0.260  |
|       |           | GG    | 16 | 6213±165 | 0.584 | 31  | 5052±945 | 0.007  |
|       |           | GG+AG | 69 | 6568±189 | 0.582 | 126 | 5349±128 | 0.088  |
|       |           | Trend |    |          | 0.836 |     |          | 0.015  |
| VCAM1 | rs3917010 | AA    | 54 | 6461±188 |       | 147 | 5510±141 |        |
|       |           | AC    | 34 | 6532±172 | 0.876 | 70  | 5479±119 | 0.434  |
|       |           | CC    | 15 | 6660±127 | 0.676 | 11  | 5564±113 | 0.832  |
|       |           | CC+AC | 49 | 6571±158 | 0.778 | 81  | 5490±118 | 0.504  |
|       |           | Trend |    |          | 0.709 |     |          | 0.621  |
| VCAM1 | rs3176867 | CC    | 79 | 6558±163 |       | 151 | 5703±132 |        |
|       |           | CT    | 17 | 6753±213 | 0.783 | 74  | 5082±117 | 0.001  |
|       |           | TT    | 7  | 5429±178 | 0.175 | 4   | 4425±550 | <0.001 |
|       |           | TT+CT | 24 | 6367±209 | 0.617 | 78  | 5049±116 | <0.001 |
|       |           | Trend |    |          | 0.329 |     |          | <0.001 |
| VCAM1 | rs3917012 | TT    | 57 | 6342±165 |       | 125 | 5665±133 |        |
|       |           | GT    | 38 | 6892±183 | 0.318 | 89  | 5380±136 | 0.237  |
|       |           | GG    | 7  | 5686±166 | 0.399 | 16  | 4863±839 | 0.001  |
|       |           | GG+GT | 45 | 6704±184 | 0.616 | 105 | 5301±130 | 0.077  |
|       |           | Trend |    |          | 0.977 |     |          | 0.012  |
| VCAM1 | rs3176869 | AA    | 98 | 6536±171 |       | 216 | 5528±134 |        |
|       |           | AT    | 5  | 6080±237 | 0.558 | 11  | 5136±101 | 0.047  |
|       |           | TT    |    |          |       | 1   | 3200     | <0.001 |
|       |           | TT+AT | 5  | 6080±237 | 0.558 | 12  | 4975±111 | 0.016  |
|       |           | Trend |    |          | 0.558 |     |          | 0.003  |
| VCAM1 | rs3181088 | CC    | 78 | 6515±167 |       | 175 | 5536±136 |        |
|       |           | CT    | 22 | 6473±204 | 0.970 | 48  | 5513±125 | 0.286  |
|       |           | TT    | 3  | 6767±179 | 0.652 | 7   | 4471±547 | 0.050  |
|       |           | TT+CT | 25 | 6508±198 | 0.856 | 55  | 5380±123 | 0.577  |
|       |           | Trend |    |          | 0.758 |     |          | 0.950  |
| VCAM1 | rs3176874 | AA    | 60 | 6933±181 |       | 124 | 5574±133 |        |
|       |           | AG    | 36 | 5969±143 | 0.006 | 84  | 5446±131 | 0.248  |
|       |           | GG    | 7  | 5714±165 | 0.014 | 21  | 5319±141 | 0.345  |
|       |           | GG+AG | 43 | 5928±145 | 0.003 | 105 | 5421±132 | 0.175  |
|       |           | Trend |    |          | 0.002 |     |          | 0.190  |
| VCAM1 | rs3917018 | AA    | 34 | 6432±169 |       | 74  | 5401±129 |        |
|       |           | AG    | 38 | 6600±190 | 0.485 | 107 | 5688±140 | 0.048  |
|       |           | GG    | 31 | 6497±163 | 0.523 | 49  | 5233±119 | 0.879  |

|            |            |       |    |          |        |     |          |       |
|------------|------------|-------|----|----------|--------|-----|----------|-------|
|            |            | GG+AG | 69 | 6554±177 | 0.433  | 156 | 5545±135 | 0.115 |
|            |            | Trend |    |          | 0.529  |     |          | 0.613 |
| <i>XDH</i> | rs10490361 | CC    | 35 | 6549±211 |        | 85  | 5371±124 |       |
|            |            | CG    | 44 | 6425±157 | 0.939  | 101 | 5435±125 | 0.688 |
|            |            | GG    | 24 | 6625±148 | 0.793  | 44  | 5893±160 | 0.112 |
|            |            | GG+CG | 68 | 6496±153 | 0.959  | 145 | 5574±137 | 0.692 |
|            |            | Trend |    |          | 0.818  |     |          | 0.188 |
| <i>XDH</i> | rs207432   | AA    | 51 | 6420±201 |        | 113 | 5435±123 |       |
|            |            | AC    | 41 | 6520±143 | 0.914  | 92  | 5445±127 | 0.541 |
|            |            | CC    | 11 | 6927±145 | 0.206  | 25  | 5988±182 | 0.292 |
|            |            | CC+AC | 52 | 6606±143 | 0.553  | 117 | 5561±141 | 0.952 |
|            |            | Trend |    |          | 0.322  |     |          | 0.571 |
| <i>XDH</i> | rs9308919  | CC    | 94 | 6607±177 |        | 199 | 5521±133 |       |
|            |            | CT    | 9  | 5533±812 | 0.013  | 27  | 5200±127 | 0.042 |
|            |            | TT    |    |          |        | 4   | 6425±939 | 0.324 |
|            |            | TT+CT | 9  | 5533±812 | 0.013  | 31  | 5358±129 | 0.108 |
|            |            | Trend |    |          | 0.013  |     |          | 0.289 |
| <i>XDH</i> | rs17038412 | TT    | 36 | 6556±175 |        | 87  | 5647±128 |       |
|            |            | AT    | 57 | 6596±181 | 0.719  | 113 | 5404±121 | 0.783 |
|            |            | AA    | 10 | 5890±121 | 0.128  | 30  | 5423±181 | 0.711 |
|            |            | AA+AT | 67 | 6491±174 | 0.991  | 143 | 5408±135 | 0.722 |
|            |            | Trend |    |          | 0.481  |     |          | 0.692 |
| <i>XDH</i> | rs1429376  | CC    | 72 | 6803±183 |        | 161 | 5504±135 |       |
|            |            | AC    | 28 | 5929±130 | 0.043  | 58  | 5566±135 | 0.899 |
|            |            | AA    | 3  | 5033±929 | 0.052  | 11  | 5064±680 | 0.068 |
|            |            | AA+AC | 31 | 5842±128 | 0.020  | 69  | 5486±127 | 0.792 |
|            |            | Trend |    |          | 0.011  |     |          | 0.478 |
| <i>XDH</i> | rs12621192 | CC    | 26 | 5796±111 |        | 71  | 5331±145 |       |
|            |            | CT    | 63 | 6624±178 | 0.001  | 113 | 5585±125 | 0.309 |
|            |            | TT    | 14 | 7350±207 | 0.067  | 44  | 5623±131 | 0.315 |
|            |            | TT+CT | 77 | 6756±185 | <0.001 | 157 | 5596±126 | 0.253 |
|            |            | Trend |    |          | 0.011  |     |          | 0.286 |
| <i>XDH</i> | rs2163059  | AA    | 36 | 6625±179 |        | 85  | 5569±128 |       |
|            |            | AG    | 58 | 6553±178 | 0.711  | 113 | 5433±119 | 0.953 |
|            |            | GG    | 9  | 5811±111 | 0.071  | 31  | 5584±185 | 0.854 |
|            |            | GG+AG | 67 | 6454±172 | 0.530  | 144 | 5465±135 | 0.990 |
|            |            | Trend |    |          | 0.226  |     |          | 0.898 |
| <i>XDH</i> | rs6718606  | CC    | 77 | 6748±178 |        | 159 | 5450±134 |       |
|            |            | CG    | 25 | 5820±145 | 0.008  | 60  | 5703±136 | 0.393 |
|            |            | GG    | 1  | 5800     | 0.199  | 11  | 5082±687 | 0.086 |
|            |            | GG+CG | 26 | 5819±142 | 0.007  | 71  | 5607±129 | 0.660 |
|            |            | Trend |    |          | 0.010  |     |          | 0.940 |
| <i>XDH</i> | rs3769618  | CC    | 45 | 6669±175 |        | 106 | 5451±125 |       |
|            |            | CT    | 50 | 6496±179 | 0.488  | 98  | 5586±124 | 0.158 |
|            |            | TT    | 8  | 5750±118 | 0.043  | 25  | 5408±189 | 0.985 |
|            |            | TT+CT | 58 | 6393±173 | 0.299  | 123 | 5550±139 | 0.241 |
|            |            | Trend |    |          | 0.121  |     |          | 0.548 |
| <i>XDH</i> | rs206849   | AA    | 35 | 6669±202 |        | 73  | 5433±124 |       |
|            |            | AG    | 52 | 6558±164 | 0.854  | 110 | 5597±142 | 0.203 |

|            |           |       |    |          |       |     |          |       |
|------------|-----------|-------|----|----------|-------|-----|----------|-------|
|            |           | GG    | 15 | 6007±139 | 0.258 | 45  | 5384±124 | 0.863 |
|            |           | GG+AG | 67 | 6434±160 | 0.641 | 155 | 5535±137 | 0.303 |
|            |           | Trend |    |          | 0.359 |     |          | 0.703 |
| <i>XDH</i> | rs206855  | AA    | 50 | 6894±192 |       | 85  | 5387±120 |       |
|            |           | AT    | 42 | 6250±147 | 0.140 | 103 | 5668±143 | 0.068 |
|            |           | TT    | 11 | 5791±148 | 0.104 | 41  | 5334±127 | 0.902 |
|            |           | TT+AT | 53 | 6155±147 | 0.074 | 144 | 5573±139 | 0.143 |
|            |           | Trend |    |          | 0.057 |     |          | 0.566 |
| <i>XDH</i> | rs206858  | GG    | 46 | 6822±189 |       | 86  | 5395±120 |       |
|            |           | CG    | 44 | 6407±160 | 0.317 | 102 | 5664±144 | 0.084 |
|            |           | CC    | 13 | 5785±143 | 0.072 | 41  | 5334±127 | 0.946 |
|            |           | CC+CG | 57 | 6265±157 | 0.153 | 143 | 5569±140 | 0.172 |
|            |           | Trend |    |          | 0.074 |     |          | 0.610 |
| <i>XDH</i> | rs206860  | AA    | 18 | 5772±118 |       | 67  | 5334±122 |       |
|            |           | AG    | 53 | 6398±167 | 0.144 | 116 | 5616±137 | 0.101 |
|            |           | GG    | 32 | 7122±194 | 0.008 | 44  | 5364±124 | 0.967 |
|            |           | GG+AG | 85 | 6671±180 | 0.032 | 160 | 5547±133 | 0.218 |
|            |           | Trend |    |          | 0.008 |     |          | 0.824 |
| <i>XDH</i> | rs494852  | CC    | 88 | 6467±175 |       | 199 | 5482±132 |       |
|            |           | CT    | 15 | 6787±168 | 0.284 | 31  | 5606±139 | 0.501 |
| <i>XDH</i> | rs1429372 | AA    | 46 | 6978±189 |       | 91  | 5542±133 |       |
|            |           | AG    | 48 | 6242±159 | 0.039 | 104 | 5563±137 | 0.704 |
|            |           | GG    | 9  | 5589±917 | 0.001 | 34  | 5224±120 | 0.425 |
|            |           | GG+AG | 57 | 6139±151 | 0.014 | 138 | 5479±133 | 0.948 |
|            |           | Trend |    |          | 0.003 |     |          | 0.642 |
| <i>XDH</i> | rs206811  | AA    | 39 | 6867±194 |       | 83  | 5511±140 |       |
|            |           | AG    | 50 | 6468±163 | 0.442 | 105 | 5581±134 | 0.641 |
|            |           | GG    | 14 | 5693±120 | 0.030 | 42  | 5269±114 | 0.706 |
|            |           | GG+AG | 64 | 6298±157 | 0.199 | 147 | 5492±129 | 0.820 |
|            |           | Trend |    |          | 0.053 |     |          | 0.848 |
| <i>XDH</i> | rs4952236 | GG    | 50 | 6860±192 |       | 98  | 5609±144 |       |
|            |           | GT    | 47 | 6289±152 | 0.252 | 103 | 5456±128 | 0.590 |
|            |           | TT    | 6  | 5383±962 | 0.004 | 29  | 5276±104 | 0.396 |
|            |           | TT+GT | 53 | 6187±149 | 0.122 | 132 | 5417±123 | 0.493 |
|            |           | Trend |    |          | 0.031 |     |          | 0.405 |

<sup>1</sup> Models were adjusted for age, sex, current smoking, current alcohol drinking, BMI, recent infections, and in exposed workers in air benzene exposure and in air toluene exposure in the month prior to phlebotomy.

There are two controls without BMI data and they are excluded from the statistical analysis.

<sup>2</sup> Unadjusted total WBC count (/ul) as mean ± standard deviation.



Supplementary Table 3. Association between selected genetic polymorphism and WBC subtype and platelet counts in benzene-exposed workers and controls <sup>1</sup>.

| Gene         |       | Granulocytes |        | Lymphocytes |        | CD4 <sup>+</sup> -T cells |        | CD8 <sup>+</sup> -T cells |       | Ratio       |        | B Cells |       | NK cells |        | Monocytes |        | Platelets |       |
|--------------|-------|--------------|--------|-------------|--------|---------------------------|--------|---------------------------|-------|-------------|--------|---------|-------|----------|--------|-----------|--------|-----------|-------|
|              |       | Count        | P      | Count       | P      | Count                     | P      | Count                     | P     | Count       | P      | Count   | P     | Count    | P      | Count     | P      | Count     | P     |
| <i>MBP</i>   | AA    | 3337±1033    |        | 1919±518    |        | 615±184                   |        | 555±218                   |       | 1.206±0.421 |        | 168±81  |       | 532±278  |        | 208±86    |        | 203±53.8  |       |
| rs470261     | AG    | 3663±825     | 0.380  | 2450±421    | <0.001 | 851±113                   | <0.001 | 587±231                   | 0.668 | 1.611±0.509 | 0.015  | 204±116 | 0.807 | 738±289  | 0.017  | 325±116   | <0.001 | 220±26.4  | 0.015 |
| <i>VCAM1</i> | TT    | 3437±979     |        | 2006±550    |        | 637±186                   |        | 575±230                   |       | 1.214±0.437 |        | 177±83  |       | 556±296  |        | 224±92    |        | 208±55.0  |       |
| rs1041163    | CT    | 3153±1146    | 0.087  | 1789±419    | 0.004  | 591±194                   | 0.108  | 510±180                   | 0.028 | 1.221±0.378 | 0.436  | 151±82  | 0.084 | 516±235  | 0.767  | 185±76    | 0.006  | 189±45.0  | 0.104 |
|              | CC    | 2900±604     | 0.077  | 1560±195    | 0.018  | 595±117                   | 0.454  | 510±186                   | 0.800 | 1.388±0.784 | 0.954  | 118±43  | 0.013 | 283±103  | 0.004  | 160±55    | 0.087  | 221±61.9  | 0.914 |
|              | CC/CT | 3134±1114    | 0.049  | 1772±410    | 0.002  | 591±188                   | 0.096  | 510±179                   | 0.033 | 1.234±0.414 | 0.487  | 148±80  | 0.042 | 498±236  | 0.369  | 184±75    | 0.003  | 191±46.7  | 0.116 |
|              | Trend |              | 0.027  |             | 0.001  |                           | 0.093  |                           | 0.063 |             | 0.594  |         | 0.019 |          | 0.145  |           | 0.002  |           | 0.153 |
| rs3176867    | CC    | 3459±994     |        | 2021±559    |        | 635±189                   |        | 581±236                   |       | 1.205±0.444 |        | 179±84  |       | 567±297  |        | 223±93    |        | 209±55.5  |       |
|              | CT    | 3100±959     | 0.012  | 1788±412    | 0.001  | 601±186                   | 0.213  | 512±173                   | 0.019 | 1.234±0.371 | 0.190  | 147±74  | 0.019 | 499±238  | 0.132  | 195±79    | 0.028  | 190±44.3  | 0.051 |
|              | TT    | 2750±580     | 0.011  | 1525±206    | 0.009  | 587±133                   | 0.415  | 484±205                   | 0.521 | 1.478±0.875 | 0.816  | 123±48  | 0.043 | 247±75   | <0.001 | 150±58    | 0.023  | 224±71.1  | 0.949 |
|              | TT/CT | 3082±944     | 0.006  | 1774±407    | <0.001 | 600±183                   | 0.193  | 510±173                   | 0.017 | 1.247±0.404 | 0.196  | 146±72  | 0.011 | 486±239  | 0.048  | 192±79    | 0.013  | 192±46.0  | 0.060 |
|              | Trend |              | 0.002  |             | <0.001 |                           | 0.175  |                           | 0.024 |             | 0.256  |         | 0.006 |          | 0.013  |           | 0.006  |           | 0.087 |
| <i>ALOX5</i> | TT    | 3422±1027    |        | 1984±535    |        | 632±193                   |        | 572±232                   |       | 1.212±0.44  |        | 170±85  |       | 560±282  |        | 216±89    |        | 204±54.6  |       |
| rs4948671    | CT    | 3144±1013    | 0.018  | 1796±463    | 0.010  | 599±168                   | 0.181  | 502±158                   | 0.048 | 1.262±0.398 | 0.542  | 165±78  | 0.416 | 469±264  | 0.032  | 200±91    | 0.106  | 200±47.4  | 0.238 |
|              | CC    | 2800±854     | 0.103  | 1833±603    | 0.404  | 530±166                   | 0.217  | 604±204                   | 0.490 | 0.88±0.079  | <0.001 | 160±74  | 0.842 | 600±339  | 0.873  | 200±0     | 0.472  | 253±63.8  | 0.168 |
|              | CC/CT | 3126±1002    | 0.011  | 1798±465    | 0.009  | 596±167                   | 0.139  | 508±160                   | 0.064 | 1.242±0.397 | 0.747  | 165±77  | 0.412 | 476±266  | 0.039  | 200±89    | 0.101  | 202±49.1  | 0.421 |
|              | Trend |              | 0.007  |             | 0.010  |                           | 0.104  |                           | 0.114 |             | 0.948  |         | 0.420 |          | 0.064  |           | 0.099  |           | 0.758 |
| rs7099684    | TT    | 3431±1024    |        | 1985±536    |        | 633±194                   |        | 572±233                   |       | 1.215±0.44  |        | 171±85  |       | 562±282  |        | 217±89    |        | 204±54.7  |       |
|              | AT    | 3069±828     | 0.004  | 1806±457    | 0.015  | 602±169                   | 0.224  | 508±156                   | 0.088 | 1.252±0.401 | 0.669  | 162±70  | 0.362 | 472±265  | 0.034  | 204±91    | 0.141  | 199±46.6  | 0.229 |
|              | AA    | 2733±850     | 0.059  | 1533±757    | 0.084  | 473±174                   | 0.053  | 488±296                   | 0.404 | 1.113±0.482 | 0.478  | 158±76  | 0.769 | 476±423  | 0.362  | 167±58    | 0.150  | 248±70.8  | 0.186 |
|              | AA/AT | 3051±825     | 0.002  | 1791±471    | 0.007  | 595±170                   | 0.137  | 507±162                   | 0.068 | 1.244±0.402 | 0.775  | 162±70  | 0.354 | 472±270  | 0.026  | 202±89    | 0.109  | 201±48.7  | 0.417 |
|              | Trend |              | 0.001  |             | 0.004  |                           | 0.076  |                           | 0.067 |             | 0.918  |         | 0.359 |          | 0.026  |           | 0.081  |           | 0.748 |
| <i>MPO</i>   | TT    | 3254±935     |        | 1916±532    |        | 609±185                   |        | 549±220                   |       | 1.215±0.443 |        | 163±80  |       | 537±280  |        | 212±90    |        | 201±52.1  |       |
| rs2071409    | GT    | 3694±1304    | 0.019  | 2021±468    | 0.110  | 687±186                   | 0.022  | 594±216                   | 0.113 | 1.235±0.351 | 0.617  | 193±94  | 0.005 | 535±273  | 0.745  | 200±74    | 0.867  | 212±52.4  | 0.464 |
|              | GG    | 4950±896     | <0.001 | 2275±465    | 0.026  | 754±191                   | 0.057  | 596±95                    | 0.007 | 1.305±0.472 | 0.685  | 225±82  | 0.026 | 698±407  | 0.155  | 325±96    | <0.001 | 262±83.2  | 0.162 |
|              | GG/GT | 3826±1317    | 0.002  | 2047±468    | 0.043  | 694±185                   | 0.008  | 594±206                   | 0.061 | 1.242±0.358 | 0.566  | 197±93  | 0.002 | 552±287  | 0.504  | 213±84    | 0.607  | 217±57.0  | 0.248 |

| Gene        |       | Granulocytes |                  | Lymphocytes |       | CD4 <sup>+</sup> -T cells |              | CD8 <sup>+</sup> -T cells |       | Ratio       |       | B Cells |              | NK cells |       | Monocytes |       | Platelets |              |
|-------------|-------|--------------|------------------|-------------|-------|---------------------------|--------------|---------------------------|-------|-------------|-------|---------|--------------|----------|-------|-----------|-------|-----------|--------------|
|             |       | Count        | P                | Count       | P     | Count                     | P            | Count                     | P     | Count       | P     | Count   | P            | Count    | P     | Count     | P     | Count     | P            |
|             | Trend |              | <b>&lt;0.001</b> |             | 0.017 |                           | <b>0.005</b> |                           | 0.029 |             | 0.545 |         | <b>0.001</b> |          | 0.331 |           | 0.251 |           | 0.155        |
| <i>RAC2</i> | GG    | 3422±1066    |                  | 1972±529    |       | 631±192                   |              | 566±216                   |       | 1.208±0.434 |       | 171±86  |              | 553±283  |       | 219±90    |       | 208±53.6  |              |
| rs2239773   | AG    | 2990±718     | <b>0.005</b>     | 1772±465    | 0.071 | 588±162                   | 0.133        | 511±226                   | 0.134 | 1.279±0.406 | 0.623 | 157±65  | 0.779        | 470±258  | 0.480 | 179±77    | 0.083 | 181±45.5  | <b>0.001</b> |
| <i>CRP</i>  | CC    | 3327±1034    |                  | 1937±526    |       | 621±190                   |              | 559±221                   |       | 1.21±0.43   |       | 169±84  |              | 543±281  |       | 213±91    |       | 202±51.9  |              |
| rs1800947   | CG    | 3742±834     | <b>0.002</b>     | 1958±489    | 0.195 | 668±131                   | 0.121        | 513±149                   | 0.932 | 1.388±0.39  | 0.294 | 166±67  | 0.429        | 463±257  | 0.716 | 200±60    | 0.398 | 235±67.4  | 0.040        |

<sup>1</sup> P values from GEE models adjusted for age, sex, current smoking, current alcohol drinking, BMI, recent infections, In air benzene exposure, and In air toluene exposure in the month prior to phlebotomy.
